# Supplementary material for: Integrated Metabolomics and Transcriptomics Analyses Reveal the Metabolic Differences and Molecular Basis of Nutritional Quality in Landraces and Cultivated Rice
Source: Metabolites. 2022 Apr 22;12(5):384. doi: 10.3390/metabo12050384 (PMC9142891; doi:10.3390/metabo12050384)
Supplement: Supplementary file 1 [file metabolites-12-00384-s001.zip › Supplementary Tables.xlsx]

## Sheet: Table S1
Table S1. The information of rice varieties used in this study.
ID	Name	Original producing area	Variety Group
SR01	hong dao 8 hao	Yunnan Agricultural University	landrace
SR02	dian hong 151	Yunnan Agricultural University	landrace
SR03	dian hong 1615	Yunnan Agricultural University	landrace
SR04	dian zi nuo 4 hao	Yunnan Agricultural University	landrace
SR05	dian xiang zi 1 hao	Yunnan Agricultural University	landrace
SR06	hong yang 3 hao	Yunnan Agricultural University	landrace
SR07	hu chang 1 hao	Yunnan Agricultural University	landrace
SR08	he jia tai	Yunnan Agricultural University	landrace
SR09	kui neng zi mi	Hainan University	landrace
SR10	yao shan hong mi	Hainan University	landrace
SR11	hei nuo 16	Hainan University	landrace
SR12	qian jiang nan	Hainan University	landrace
SR13	si chuan hei dao	Hainan University	landrace
SR14	ji yang hei mi	Hainan University	landrace
SR15	hu xi zi mi	Hainan University	landrace
SR16	hei xiang nuo	Hainan University	landrace
SR17	tian dao hei 6 hao	Hainan University	landrace
SR18	tai guo xiang pai xiang mi	Hainan University	landrace
SR20	tian dao hong 2 hao	Hainan University	landrace
SR21	yong chuan xiang mi	Hainan University	landrace
SR22	19ZF2-15	Hainan University	landrace
SR24	19ZF2-16 hong mi 2 hao	Hainan University	landrace
SR26	19ZF2-12	Hainan University	landrace
SR27	19ZP55	Hainan University	landrace
SR28	19ZP69	Hainan University	landrace
SR31	19LD009	Hainan University	landrace
SR32	19LD019	Hainan University	landrace
SR36	19LD062	Hainan University	landrace
SR39	19LD091	Hainan University	landrace
SR44	19LD136	Hainan University	landrace
SR45	19LD140	Hainan University	landrace
SR47	19LD142	Hainan University	landrace
SR49	19LD145	Hainan University	landrace
SR50	19LD131	Hainan University	landrace
SR51	19LD146	Hainan University	landrace
NR03	2018WH806	Huazhong Agricultural University	cultivated rice
NR04	2018WH807	Huazhong Agricultural University	cultivated rice
NR05	2018WH842	Huazhong Agricultural University	cultivated rice
NR09	CSJ 89-21	Huazhong Agricultural University	cultivated rice
NR10	CSJ 89-30	Huazhong Agricultural University	cultivated rice
NR100	Rg 59-6 一	Huazhong Agricultural University	cultivated rice
NR101	Rg 67-M	Huazhong Agricultural University	cultivated rice
NR102	Rg 69-mix	Huazhong Agricultural University	cultivated rice
NR103	Rg 70-M	Huazhong Agricultural University	cultivated rice
NR104	Rg 71-M	Huazhong Agricultural University	cultivated rice
NR105	RH353-3	Huazhong Agricultural University	cultivated rice
NR106	RI 251(12-15)JC	Huazhong Agricultural University	cultivated rice
NR108	RI 483	Huazhong Agricultural University	cultivated rice
NR109	RI330-12,13JC	Huazhong Agricultural University	cultivated rice
NR110	RI43	Huazhong Agricultural University	cultivated rice
NR111	RI484	Huazhong Agricultural University	cultivated rice
NR113	RI493-2,3,4	Huazhong Agricultural University	cultivated rice
NR114	RI499-2,3,4	Huazhong Agricultural University	cultivated rice
NR116	RJ 1405-1 2019 .WH	Huazhong Agricultural University	cultivated rice
NR117	RJ 1400-1 2019 CCH	Huazhong Agricultural University	cultivated rice
NR118	SYY RJ1400-2	Huazhong Agricultural University	cultivated rice
NR119	SYY RJ1400-3 2019 WH	Huazhong Agricultural University	cultivated rice
NR122	ZS	Huazhong Agricultural University	cultivated rice
NR123	黄华占	Huazhong Agricultural University	cultivated rice
NR18	Ind c135 R290	Huazhong Agricultural University	cultivated rice
NR19	Ind c139 R500	Huazhong Agricultural University	cultivated rice
NR24	Ind w203 R502	Huazhong Agricultural University	cultivated rice
NR35	Jap w024 R304	Huazhong Agricultural University	cultivated rice
NR36	Jap w057 R532	Huazhong Agricultural University	cultivated rice
NR38	Jap w116 R481	Huazhong Agricultural University	cultivated rice
NR40	Jap w193 R253	Huazhong Agricultural University	cultivated rice
NR41	Jap w250 R257	Huazhong Agricultural University	cultivated rice
NR42	Jap w324 R529	Huazhong Agricultural University	cultivated rice
NR43	Jap w326 R528	Huazhong Agricultural University	cultivated rice
NR45	MA165	Huazhong Agricultural University	cultivated rice
NR46	MA176	Huazhong Agricultural University	cultivated rice
NR48	NA1178	Huazhong Agricultural University	cultivated rice
NR49	NA364	Huazhong Agricultural University	cultivated rice
NR50	NA437	Huazhong Agricultural University	cultivated rice
NR57	Rg 1539-16	Huazhong Agricultural University	cultivated rice
NR58	Rg 1558-1	Huazhong Agricultural University	cultivated rice
NR60	Rg 1559-3	Huazhong Agricultural University	cultivated rice
NR61	Rg 1559-4	Huazhong Agricultural University	cultivated rice
NR62	Rg 1560-1	Huazhong Agricultural University	cultivated rice
NR63	Rg 1560-2	Huazhong Agricultural University	cultivated rice
NR64	Rg 1560-2	Huazhong Agricultural University	cultivated rice
NR66	Rg 1562-2	Huazhong Agricultural University	cultivated rice
NR67	Rg 1564-1	Huazhong Agricultural University	cultivated rice
NR68	Rg 1564-3	Huazhong Agricultural University	cultivated rice
NR69	Rg 157-4,5	Huazhong Agricultural University	cultivated rice
NR70	Rg 158-2.4.10	Huazhong Agricultural University	cultivated rice
NR71	Rg 1638-1,2	Huazhong Agricultural University	cultivated rice
NR72	Rg 1664-M	Huazhong Agricultural University	cultivated rice
NR73	Rg 1670-M	Huazhong Agricultural University	cultivated rice
NR74	Rg 1671-m	Huazhong Agricultural University	cultivated rice
NR75	Rg 1675-MIX	Huazhong Agricultural University	cultivated rice
NR76	Rg 1677-m	Huazhong Agricultural University	cultivated rice
NR77	Rg 1680-M	Huazhong Agricultural University	cultivated rice
NR78	Rg 1681-1	Huazhong Agricultural University	cultivated rice
NR79	Rg 1696-3	Huazhong Agricultural University	cultivated rice
NR80	Rg 1696-4	Huazhong Agricultural University	cultivated rice
NR81	Rg 1696-5	Huazhong Agricultural University	cultivated rice
NR82	Rg 1698-1	Huazhong Agricultural University	cultivated rice
NR83	Rg 202-2	Huazhong Agricultural University	cultivated rice
NR84	Rg 202-2	Huazhong Agricultural University	cultivated rice
NR85	Rg 203 混	Huazhong Agricultural University	cultivated rice
NR88	Rg 205-4	Huazhong Agricultural University	cultivated rice
NR90	Rg 205-4	Huazhong Agricultural University	cultivated rice
NR91	Rg 47-13	Huazhong Agricultural University	cultivated rice
NR94	Rg 59-3 mix	Huazhong Agricultural University	cultivated rice
NR95	Rg 59-3 一	Huazhong Agricultural University	cultivated rice
NR96	Rg 59-5 5ix	Huazhong Agricultural University	cultivated rice
NR97	Rg 59-5 Mix	Huazhong Agricultural University	cultivated rice
NR99	Rg 59-6 mix	Huazhong Agricultural University	cultivated rice
MH	MH	Huazhong Agricultural University	cultivated rice
HHZ	黄华占	Huazhong Agricultural University	cultivated rice
NIP	日本晴	Huazhong Agricultural University	cultivated rice
ZH11	中花11	Huazhong Agricultural University	cultivated rice
DJ	东京	Huazhong Agricultural University	cultivated rice

## Sheet: Table S2
Table S2. Scheduled MRM transitions for widely targeted metabolite analysis in landraces seed.
ID	Ion mode	precursor ions(Q1)	product ions(Q3)	retention time	fragment	Compounds	class	identify
sp001	Positive	74	57	0.81	57, 59.0065, 56.1055, 56.88, 65.9973, 72.0279, 54.4433,	1-methylguanidine	Nucleotide and its derivates	putatively annotated
sp005	Positive	86.1	69.2	1.28	69.2, 68.9566, 67.9385, 70.9696, 84.4181,		unknown
sp006	Positive	90.048	44	0.79	44, 90.0331, 70.0157, 66.72,	L-Alanine	Amino acids	putatively annotated
sp007	positive	94.1	81.9647	0.69	81.9647, 93.9556, 71.0736, 91.115, 77.07, 86.0007, 61.9822, 56.77,		unknown
sp009	Positive	103	86	0.77	86, 102.9471, 60.918, 69.024, 84.9741, 76.9133, 70.0581, 79.1282,	1,5-Diaminopentane	Phenolamides	putatively annotated
sp010	Positive	104	58	0.8	58, 57.9467, 86.4115, 87.9442, 55.7693, 100.08,	2-Aminoisobutyric acid	Amino acid derivatives	putatively annotated
sp011	Positive	104	86	0.79	86, 57.9847, 60.9097, 86.0928, 71.1364, 56.02, 87.88, 62.9314,	N,N-Dimethylglycine	Amino acid derivatives	putatively annotated
sp012	Positive	106	60	0.8	60, 91.0031, 98.9296, 87.9472, 97.9125, 74.8514, 106.0306, 84.3092,	L-Serine	Amino acids	putatively annotated
sp013	positive	107.1	77.0315	1.67	77.0315, 91.0714, 79.0323, 104.9945, 65.048, 74.9677, 72.8676, 88.8821,		unknown
sp015	Positive	112	95	0.85	95, 78.9895, 70.0088, 111.1205, 67.0885, 77.0208, 84.0231, 68.9635,	Cytosine	Nucleotide and its derivates	putatively annotated
sp017	Positive	112.1	94	2.65	94, 69.982, 71.9227, 94.9468, 67.9018, 72.93, 84.96, 97.5467,	Pyrrole-2-carboxylic acid	Amino acid derivatives	putatively annotated
sp018	Positive	174.105	86	3.29	86, 132.1381, 117.1771, 130.053, 118.2939, 144.1434, 145.2284, 115.0571,		unknown
sp019	Positive	114.059	86	0.68	86, 68.04, 98.1072, 74.8149, 71.7643, 59.8513, 73.68, 81.12,	Creatinine	Organic acids	putatively annotated
sp020	Positive	116.1	70.1	0.83	70.1, 69.984,74.9884,99.0133,72.8914,68.875,76.0122,67.7914,	L-Proline	Amino acids	putatively annotated
sp022	Positive	118	72	0.86	72, 116.1137, 117.1358, 91.0962, 115.0604, 72.9133, 89.0194, 89.9455,	Dl-Norvaline	Amino acids	putatively annotated
sp023	Positive	118	91	2.18	91, 72.9076, 76.9555, 71.9333, 89.8662, 59.01, 91.1849, 67.8353,	Indole	Indole derivatives	putatively annotated
sp024	Positive	118.1	59	0.81	59, 57.9941, 70.048, 59.0337, 55.94, 102.1429, 76.8672, 99.9661,	Betaine	Alkaloids	putatively annotated
sp025	Positive	119.03	101	0.69	101, 76.9772, 59.0009, 60.9495, 58.0108, 74.955, 62.9368, 102.9,		unknown
sp026	Positive	120	74	0.8	74, 91.0267, 64.8506, 102.885, 93.0333, 106.0815, 61.0133, 79.0634,	L-Threonine	Amino acids	putatively annotated
sp027	Positive	121	94	1.07	94, 77.9992, 92.0338, 77.0082, 102.9285, 91.0522, 60.9688, 119.2248,		unknown
sp028	Positive	121	94	1.67	94, 77.0365, 102.9193, 64.984, 93.0048, 70.8667, 104.9564, 91.0729,	Purine	Nucleotide and its derivates	putatively annotated
sp029	Positive	138.084	103	1.31	103, 121.1709, 77.0586, 81.8736, 55.8324, 91.0185, 102.8594, 67.484,	L-Tyramine	Amino acids	putatively annotated
sp030	Positive	121.042	93.058	2.79	93.058, 91.0662, 105.1127, 93.1426, 79.0529, 102.9806, 64.9608, 119.0558,		unknown
sp031	Positive	121.042	93.058	12.3	93.058, 64.8929, 76.9284, 93.0465, 90.9775, 78.9956, 103.0187, 104.91,		unknown
sp032	Positive	122	105	1.66	105,103.9757,60.952,71.8977,105.0952,107.1952,106.1178,78.8918,		unknown
sp033	Positive	122	105	2.19	105,76.98,103.9562,78.9752,60.951,80.9681,94.0229,107.1522,	Benzamide	Others	putatively annotated
sp034	Positive	122.1	105	2.19	105,77.0293,102.9372,79.0913,61.0175,80.8667,104.0536,94.0807,	Phenethylamine	Others	putatively annotated
sp035	Positive	122.1	105	2.75	105,78.96,72.8949,105.1072,95.0839,106.9317,81.892,55.9043,		unknown
sp036	Positive	123.037	79	4.19	79,79.023,77.0233,95.0829,107.1092,67.0034,82.0425,108.0612,	Benzoic acid	Benzoic acid derivatives	putatively annotated
sp038	Positive	123.04	95	3.28	95,77.0233,79.0374,81.1889,95.0319,61.0054,67.1224,105.1161,	4-Hydroxybenzaldehyde	Benzoic acid derivatives	putatively annotated
sp039	Positive	123.1	79.9	1.35	79.9,79.9742,82.9983,96.1184,76.8643,101.0354,94.96,68.0122,	Niacinamide	Vitamine	standard
sp041	Positive	150	61	1.04	61,60.9572,72.8967,102.1077,122.3356,134.2012,104.1106,83.836,	L-Methionine	Amino acids	putatively annotated
sp042	Positive	126	108	0.86	108,84.9389,79.9911,82.8059,83.9457,80.913,97.9313,111.0097,	2-Aminoethanesulfonic acid	Organic acids	putatively annotated
sp043	Positive	126	108	1.03	108,108.0712,70.022,84.0572,98.0337,84.8445,111.1671,79.9726,		unknown
sp044	Positive	126.1	96	0.83	96,102.8737,70.3913,97.98,80.0179,109.2956,65.8978,124.1713,		unknown
sp045	Positive	126.1	109	1.05	109,98.9964,80.9746,86.0048,79.0329,95.0858,66.9442,68.06,	5-Methylcytosine	Nucleotide and its derivates	putatively annotated
sp046	Positive	287.1	153	5.01	153,153.0523,226.7991,161.1109,269.1133,157.1353,111.2487,214.5522,	Luteolin	Flavonoid	putatively annotated
sp047	Positive	127	110	0.86	110,		unknown
sp048	Positive	127	110	1.38	110,99.001,109.1609,80.9427,57.8569,84.1168,85.8606,82.0933,	Thymine	Nucleotide and its derivates	putatively annotated
sp050	Positive	127	110	1.79	110,81.0142,99.0029,109.1044,57.8666,84.0424,70.9233,82.1616,		unknown
sp051	Positive	127.1	81.2	0.82	81.2,109.079,68.9731,97.08,99.099,84.9991,71.0137,83.088,		unknown
sp052	Positive	127.1	81.2	4.36	81.2,80.8861,57.9012,62.9088,109.0425,84.6609,59.8909,100.94,		unknown
sp053	Positive	129.1	84	1.31	84,127.0523,111.1824,117.0608,82.9855,76.94,91.1224,68.925,	5,6-Dihydro-5-methyluracil	Nucleotide and its derivates	putatively annotated
sp054	Positive	189.2	84	1.22	84,189.1316,133.1028,83.9942,129.1145,172.1662,105.1993,130.1227,	Nα-Acetyl-L-glutamine	Amino acid derivatives	putatively annotated
sp055	Positive	129.1	84	0.85	84,68.9836,72.8878,78.9055,83.9854,55.8313,71.9211,86.4086,		unknown
sp056	Positive	130	84	0.89	84,70.0354,89.0791,68.1722,74.7322,111.96,60.9234,59.8513,		unknown
sp057	Positive	130.1	103.3	4.38	103.3,70.8879,72.8677,103.024,77.0224,69.8352,60.9554,69.035,	Isoquinoline	Alkaloids	putatively annotated
sp058	Positive	131.1	114.1	0.71	114.1,72.8884,89.958,60.9177,102.9134,113.0677,131.0498,77.0618,		unknown
sp059	Positive	131.1	114.1	0.85	114.1,90.8577,103.9851,72.8493,67.8574,71.8413,131.9933,114.0562,		unknown
sp060	Positive	118.1	72.1	0.86	72.1,72.0235,57.9858,59.0886,81.2335,77,100.0601,56.5029,	L-Valine	Amino acids	putatively annotated
sp063	Positive	132.1	86.1	1.06	86.1,86.0341,90.83,71.8506,114.12,89.9813,62.8743,69.045,		unknown
sp065	Positive	134.1	74	0.81	74,88.0525,70.0245,71.0841,98.024,116.1729,64.8088,58.4047,	L-Aspartic acid	Amino acids	putatively annotated
sp066	Positive	110	92	0.86	92,68.9471,70.9004,93.9677,67.9733,69.984,67.074,84.1322,	2-Aminoethanesulfinic acid	Organic acids	putatively annotated
sp067	Positive	136.1	118.9	1.05	118.9,121.2275,77.995,108.1877,109.1164,91.0435,70.9314,77.0182,		unknown
sp068	Positive	136.1	118.9	1.63	118.9,109.1159,107.9733,91.9674,91.064,93.9938,118,107.03,		unknown
sp071	Positive	137	110	1.08	110,122.0489,119.0203,66.0031,64.9861,77.0242,91.0776,81.0953,	Hypoxanthine	Nucleotide and its derivates	putatively annotated
sp072	Positive	137.3	94.2	2.92	94.2,94.0551,122.0683,119.0079,65.9947,64.8736,108.9621,77.04,	p-Aminobenzoate	Benzoic acid derivatives	putatively annotated
sp073	Positive	138	94.01	0.81	94.01,92.0188,77.9419,64.96,96.1173,93.0229,136.182,110.2665,	Trigonelline	Alkaloids	putatively annotated
sp074	Positive	138.05	78	3.22	78,108.1149,78.9933,72.8861,124.049,79.9371,96.0771,67.9461,	Nicotinic Acid Methyl Ester (Methyl Nicotinate)	Vitamine	putatively annotated
sp075	Positive	162.05	117.994	3.28	117.994,116.12,89.023,107.1039,134.2286,77.0025,106.1553,146.2051,		unknown
sp076	Positive	138.091	121.1	1.28	121.1,122.1288,123.1709,108.12,94.0429,120.1523,81.9405,121.0696,	Hydroxyphenethylamine	Others	putatively annotated
sp077	Positive	138.091	121.1	1.79	121.1,123.0999,72.9056,108.1253,94.1969,120.0762,121.0842,64.9775,		unknown
sp078	Positive	139.03	95	2.81	95,76.9501,95.0291,64.9907,92.9378,68.9311,111.2215,66.9877,	4-Hydroxybenzoic acid	Organic acids	putatively annotated
sp079	Positive	139.03	95	0.83	95,93.1103,94.0545,78.9467,65.9951,97.0931,91.9362,65.0832,		unknown
sp080	Positive	175	84	0.85	84,116.0573,130.1646,158.2023,112.1258,157.1338,71.9878,60.0522,		unknown
sp081	positive	139.1	122.103	1.19	122.1026,68.9733,83.0621,79.0506,76.9333,91.0567,65.904,94.052,		unknown
sp082	Positive	140	94	1.34	94,71.8986,56.9371,73.9232,96,94.4803,100.656,128.0113,	6-hydroxynicotinic acid	Vitamine	putatively annotated
sp084	Positive	142.1	83.1	0.67	83.1,113.9849,71.8754,101.0245,124.1157,69.909,142.0884,132,	Histidinol	Others	putatively annotated
sp085	positive	142.1	77.9971	6.29	77.9971,113.9917,71.8565,100.9733,132.1256,68.8376,141.1897,57.9228,		unknown
sp086	positive	142.1	115.101	2.18	115.1009,71.8783,140.162,89.2125,69.8579,131.8954,82.9654,100.92,		unknown
sp087	Positive	144.1	113.2	0.68	113.2,84.9468,101.9524,102.8939,126.0853,82.9218,60.9768,100.8965,		unknown
sp088	Positive	144.1	113.2	0.81	113.2,60.9389,121.0542,84.0228,113.0461,72.9278,112.0418,73.8662,		unknown
sp090	Positive	144.1	113.2	2.16	113.2,60.9102,102.8982,126.1554,117.1496,143.1615,112.0722,115.0407,	4-Methyl-5-thiazoleethanol	Others	putatively annotated
sp091	Positive	167.027	121	1.78	121,104.0438,120.1397,151.1654,102.93,78.034,77.1089,125.9792,		unknown
sp092	Positive	146.1	117	4.21	117,91.0506,146.071,117.1009,60.9591,128.0936,64.9898,102.9375,	Indole-3-carboxaldehyde	Indole derivatives	putatively annotated
sp094	Positive	146.2	72.2	0.84	72.2,85.9576,84.9875,71.8735,60.8709,146.1424,84.048,104.0748,		unknown
sp095	Positive	147	84	0.73	84,130.1136,67.0142,111.9005,82.0885,72.7467,102.6579,64.9059,	L-(+)-Lysine	Amino acids	putatively annotated
sp097	Positive	147.12	87.2	0.86	87.2,119.1331,83.9948,74.9763,88.0138,87.0845,130.4444,64.908,	Acetylcholine	Cholines	putatively annotated
sp098	Positive	148.1	84	0.81	84,130.1067,102.0343,85.9749,112.1063,92.1868,119.9701,82.185,	L-Glutamic acid	Amino acids	putatively annotated
sp099	Positive	197.074	151	3.06	151,156.0915,151.1986,112.0294,70.907,72.9405,132.9886,197.0247,		unknown
sp100	Positive	149.052	103.01	1.67	103.01,121.0593,133.0671,72.9465,74.9607,65.0184,89.9893,91.066,		unknown
sp1006	Positive	544.4	485.2	8.36	485.2,485.2589,104.1368,486.3528,147.0559,339.4364,361.3869,86.1164,		unknown
sp101	Positive	149.2	107.1	5.7	107.1,149.1216,77.0301,121.0951,91.0685,102.9558,131.2154,132.9126,	3,4-Dihydrocoumarin	Coumarins	putatively annotated
sp1010	positive	545.1	486.257	8.55	486.2569,340.3322,147.0104,361.2439,104.1751,527.1407,536.28,214.8,		unknown
sp1015	positive	548.1	184.193	8	184.1928,502.3229,520.3253,104.0612,518.304,335.21,281.7741,125.0456,		unknown
sp1018	positive	549.1	188.096	1.82	188.0957,162.1781,206.1427,332.0886,530.8873,224.1351,109.0848,123.1538,		unknown
sp102	Positive	268.097	152	1.53	152,124.095,136.1246,195.1564,180.1977,240.2,198.2346,247.4128,	Deoxyguanosine	Nucleotide and its derivates	putatively annotated
sp1022	positive	550.1	522.33	8.54	522.33,504.3822,184.144,104.1625,540.9916,282.0617,519.2562,312.1088,		unknown
sp1024	Positive	550.37	184	9.34	184,184.155,490.2448,532.2874,125.0378,458.2778,104.14,133.176,	LysoPC 20:1 (2n isomer)	lipids	putatively annotated
sp1028	positive	552.1	184.152	2.19	184.1516,166.1416,188.1385,162.2082,534.0815,148.055,207.1043,120.0922,		unknown
sp1029	positive	552.1	184.164	6.42	184.1639,534.4236,104.1073,518.1731,125.1408,314.0538,151.0801,492.0174,		unknown
sp1030	positive	552.1	268.083	1.77	268.0833,390.1148,124.0663,533.94,394.1286,288.3065,423.0913,384.0913,		unknown
sp1031	positive	552.1	492.295	3.65	492.295,453.3318,371.4664,480.4818,381.1201,286.1262,188.1487,343.9553,		unknown
sp1032	positive	553.1	303.196	4.52	303.1957,535.39,268.0897,122.0465,250.9814,493.091,147.1855,424.9045,		unknown
sp1039	positive	557.1	177.127	6.19	177.1275,145.1836,303.0092,117.1515,345.0109,169.1857,285.107,127.2255,		unknown
sp104	Positive	137	110	1.3	110,118.9577,122.1244,65.971,64.9755,80.9491,77.0289,109.1331,		unknown
sp1041	Positive	557.2	331	4.24	331,557.1516,329.0911,528.8183,315.1371,406.7859,537.4513,527.0183,	Tricin 4'-O-(syringyl glyceryl)ether	Flavonoid	putatively annotated
sp1043	positive	558.1	177.124	6.18	177.1242,145.1474,169.1646,303.5243,117.082,541.2468,271.2089,216.1773,		unknown
sp1044	positive	558.1	299.041	9.02	299.0411,429.3738,192.2929,209.16,270.0546,533.3777,540.12,304.1713,		unknown
sp1048	positive	563.1	137.043	0.76	137.0434,219.0045,464.9771,203.0232,300.888,480.9665,382.94,398.97,		unknown
sp105	Positive	152	135	1.06	135,111.076,124.0644,109.03,110.1862,137.0659,119.112,134.04,	Guanine	Nucleotide and its derivates	putatively annotated
sp1052	Positive	565.1	433.3	3.35	433.3,547.111,457.0513,444.9874,499.0671,469.0669,480.9689,529.0916,	C-hexosyl-apigenin C-pentoside	Flavonoid	putatively annotated
sp1053	Positive	565.1	433.3	3.42	433.3,547.1138,427.1021,529.0882,493.1947,511.1018,469.0991,379.154,	C-hexosyl-apigenin O-pentoside	Flavonoid	putatively annotated
sp1054	Positive	565.1	433.3	3.62	433.3,547.0802,511.1907,529.0984,409.0988,397.1468,499.1433,379.0775,		unknown
sp1056	Positive	565.155	499.2	3.19	499.2,547.0825,499.0558,529.0185,397.1358,445.0952,457.0754,468.9652,		unknown
sp1057	Positive	565.155	499.2	3.35	499.2,547.1033,529.1081,511.1122,427.2343,457.1044,445.1149,498.9545,		unknown
sp1058	Positive	565.155	499.2	3.43	499.2,565.1468,432.9922,547.1341,287.0461,403.0656,393.1359,535.264,	C-pentosyl-C-hexosyl-apigenin	Flavonoid	putatively annotated
sp1059	positive	566.1	557.427	4.62	557.4274,114.1464,341.1405,500.8856,228.198,548.3457,453.0588,322.2574,		unknown
sp1061	positive	567.1	405.185	1.87	405.1851,387.2281,525.5769,460.9669,176.7508,489.4092,357.1194,442.0583,		unknown
sp1067	positive	569.1	551.216	4.3	551.2159,301.1957,319.2226,283.2638,533.2457,251.0474,440.2104,122.0889,		unknown
sp107	Positive	170.1	124	1.13	124,128.0766,91.9396,168.1619,85.98,113.9449,115.06,154.0964,		unknown
sp1070	positive	570.1	408.088	1.21	408.0884,389.1323,422.4528,346.9371,534,551.9673,158.1313,355.4183,		unknown
sp1074	Positive	195.058	117	3.88	117,177.0938,108.069,135.0797,107.0483,145.1462,154.1151,153.1322,		unknown
sp1079	positive	579.1	219.044	0.77	219.0445,137.0398,234.9784,316.9337,480.9504,300.9419,398.9893,496.899,		unknown
sp108	Positive	152.1	135	0.86	135,110.2418,134.0832,80.2446,136.08,106.6671,109.0286,91.0049,	2-Hydroxy-6-aminopurine	Nucleotide and its derivates	putatively annotated
sp1080	positive	579.1	271.041	4.06	271.0405,433.1783,380.9724,474.0093,341.073,355.1225,84.9382,357.2401,		unknown
sp1081	Positive	579.1	331.1	4.47	331.1,331.0932,561.1981,547.6227,519.1666,357.0524,322.0513,563.0146,	Tricin O-malonylhexoside	Flavonoid	putatively annotated
sp1088	Positive	581.1	431.3	3.18	431.3,545.1125,485.1263,413.1309,473.1084,515.0729,467.1343,461.1546,	6-C-hexosyl luteolin O-pentoside	Flavonoid	putatively annotated
sp1089	Positive	581.1	515.4	2.99	515.4,411.106,286.9944,288.0667,277.0876,413.1453,563.059,323.1383,	C-hexosyl-luteolin C-pentoside	Flavonoid	putatively annotated
sp1091	positive	582.1	268.071	1.7	268.071,420.175,124.0751,114.1138,525.4977,498.9102,401.988,430.0421,		unknown
sp1092	positive	582.1	546.192	3.2	546.1915,564.1226,444.1978,426.1886,396.0343,510.0312,462.1189,438.2705,		unknown
sp1095	Positive	584.2	325	2.2	325,325.0905,454.11,566.0745,422.2033,495.5686,530.1481,483.1242,	N',N",N"'-p-coumaroyl-cinnamoyl-caffeoyl spermidine	Phenolamides	putatively annotated
sp1096	positive	585.1	567.063	0.68	567.0629,524.9024,507.218,501.2569,452.3738,528.1749,543.9749,436.1514,		unknown
sp1099	positive	589.1	322.012	1.68	322.0119,456.9989,250.0316,261.93,208.0688,571.0219,340.2824,453.963,		unknown
sp110	Positive	153	110	1.57	110, 135.07, 110.1065, 125.1365, 79.0902, 83.9511, 111.0867, 66.0089,		unknown
sp1105	Positive	595.1	301.4	4.14	301.4, 433.0728, 313.1166, 415.0969, 336.9656, 576.9926, 397.0265, 367.0529,	Chrysoeriol O-hexosyl-O-pentoside	Flavonoid	putatively annotated
sp1106	Positive	595.2	415	3.54	415, 433.1016, 313.0486, 415.0855, 337.0636, 367.05, 397.0742, 379.0646,		unknown
sp1108	positive	599.1	581.16	2.26	581.16, 437.1895, 170.051, 419.1307, 152.1, 411.2496, 569.5742, 268.0418,		unknown
sp1110	positive	603.1	441.192	8.47	441.1925, 423.324, 176.9378, 417.12, 547.0513, 507.4801, 543.49, 351.24,		unknown
sp1112	Positive	605.1	271.6	0.83	271.6,		unknown
sp1114	positive	609.1	480.172	1.94	480.1717, 534.185, 463.2896, 301.0183, 591.107, 548.9883, 377.1986, 359.7065,		unknown
sp1115	Positive	609.1	463.3	4.09	463.3,463.1423,429.3313,510.024,436.0583,474.2605,343.08,518.1183,		unknown
sp1116	Positive	609.4	301	4.04	301,609.1045,463.0763,591.3804,281.28,325.3774,303.1243,151.1214,	Chrysoeriol 7-O-rutinoside	Flavonoid	putatively annotated
sp1117	Positive	609.4	301	4.17	301,301.0357,463.0974,500.8815,573.2,547.0583,151.17,519,		unknown
sp1118	positive	610.1	286.08	1.96	286.0803,355.0315,481.1279,592.0995,268.0748,430.1126,489.17,448.1707,		unknown
sp112	Positive	199.053	140	3.19	140,158.0411,98.9526,125.0841,95.0533,77.0066,181.2246,117.0942,	Syringic acid	Hydroxycinnamoyl derivatives	putatively annotated
sp1123	Positive	611.1	317.1	0.75	317.1,287.0439,356.0554,449.0565,355.1145,431.0637,269.0245,592.9077,		unknown
sp1124	Positive	611.1	431.3	3.27	431.3,287.0076,449.1082,356.087,355.0452,431.1546,482.135,592.8957,		unknown
sp1125	Positive	291.079	139	2.82	139,123.0884,147.1367,291.0316,165.174,161.1859,207.1163,119.1055,	Catechin	Catechin derivatives	putatively annotated
sp1126	Positive	611.153	303	3.72	303,302.9835,356.0926,449.1297,286.8986,551.1556,221.0647,465.1176,	Quercetin 3-O-rutinoside (Rutin)	Flavonoid	putatively annotated
sp1127	Positive	611.2	303.1	3.71	303.1,355.0656,281.1182,221.1063,593.0897,268.9071,285.9984,594.876,	Quercetin 7-O-rutinoside	Flavonoid	putatively annotated
sp113	Positive	153.06	136.1	1.59	136.1,135.0909,125.0206,111.1583,110.1434,107.081,137.0469,79.0982,	1,4-dihydro-1-Methyl-4-oxo-3-pyridinecarboxamide	Pyridine derivatives	putatively annotated
sp1130	Positive	121	104	1.66	104,70.9024,64.8121,93.0499,60.9731,106.0914,91.0633,105.0093,	Benzamidine	Others	putatively annotated
sp1136	Positive	625	463	3.62	463,343.0943,445.1179,397.1489,427.153,367.1299,313.0975,409.1111,		unknown
sp114	Positive	155	109	1.54	109,135.1122,125.0412,107.1263,83.8306,79.001,76.9005,109.9035,		unknown
sp1141	Positive	625.2	607.1	0.69	607.1,565.1329,375.4041,543.2045,504.7865,593.0121,363.24,459.3313,		unknown
sp1143	positive	627.1	447.258	8.26	447.2578,465.3692,609.3235,566.1094,489.2786,216.0913,585.3309,473.5543,		unknown
sp1144	Positive	627.1	465	0.84	465,567.1241,188.0831,609.045,581.0004,524.5429,422.4776,597.284,		unknown
sp1146	Positive	627.1	465.2	8.11	465.2,609.1791,465.0685,520.2842,494.0894,567.0124,477.0729,292.982,		unknown
sp1148	positive	629.1	467.303	8.71	467.3033,611.0649,449.1674,474.24,203.3491,575.52,415.2913,411.84,		unknown
sp115	Positive	155	109	2.2	109,127.11,153.1089,71.8843,68.9617,98.9487,81.0409,69.9543,		unknown
sp1157	Positive	639.1	331.4	4.17	331.4,493.0765,621.2561,314.9967,578.8873,473.3483,494.7383,534.9009,	Tricin 5-O-rutinoside	Flavonoid	putatively annotated
sp1158	Positive	641.1	479.1	0.83	479.1,623.0195,396.9499,542.6968,400.4987,453.1494,608.8694,513.3068,		unknown
sp1159	Positive	641.1	622.8	0.69	622.8,637.1714,207.1742,595.0182,619.2263,625.0874,579.3633,513.0328,		unknown
sp1160	positive	642.1	335.201	4.29	335.2011,317.2204,308.0502,179.0633,624.18,299.1938,281.1767,162.1287,		unknown
sp1162	positive	642.1	539.188	8.55	539.1876,262.0707,303.958,582.1813,202.9859,343.9611,624.1434,559.0583,		unknown
sp1163	positive	643.1	114.117	0.88	114.1166,188.0611,162.2099,481.2368,531.96,178.1143,583.2214,462.9718,		unknown
sp1170	positive	649.1	487.171	7.34	487.1706,631.2557,577.0825,359.04,421.08,555.36,343.2,571.32,		unknown
sp1172	Positive	655	207	4.61	207,291.2117,329.1793,321.3313,119.1791,365.1738,137.0113,251.28,	Luteolin O-sinapoylhexoside	Flavonoid	putatively annotated
sp1175	Positive	655.2	207.2	3.83	207.2,291.2109,329.1078,637.32,458.1189,534.12,498.3313,595.0126,		unknown
sp1178	Positive	655.2	331.2	3.43	331.2,331.1027,637.2034,625.3642,493.04,575.4243,595.2786,646.1232,	Tricin 7-O-hexosyl-O-hexoside	Flavonoid	putatively annotated
sp118	Positive	156.1	110	0.73	110,71.8619,69.8524,132.0555,82.9824,155.1325,85.5601,101.0006,	L-Histidine	Amino acids	putatively annotated
sp1189	Positive	664.2	136.2	1.06	136.2,515.6609,496.4015,501.0984,608.5552,646.4533,537.36,568.0513,		unknown
sp119	Positive	157	111	1.16	111,72.8535,116.029,115.027,73.9381,70.9257,71.928,134.0163,	Orotic acid	Vitamine	putatively annotated
sp1195	Positive	669.1	331.4	5.04	331.4,330.9966,507.1303,639.0298,641.4525,637.0929,300.9109,362.8216,	Tricin 7-O-feruloylhexoside	Flavonoid	putatively annotated
sp1200	positive	674.1	347.173	8.22	347.1735,593.377,512.3287,338.1411,656.1849,393.2518,147.12,454.32,		unknown
sp1202	positive	677.1	515.342	8.22	515.3422,588.84,		unknown
sp1204	positive	680.1	518.067	1.87	518.0672,308.0527,181.0607,162.1067,500.248,167.196,662.115,211.1583,		unknown
sp1205	positive	680.1	662.077	4.18	662.0767,518.1177,580.8983,620.5064,626.3871,591.9262,605.3102,644.3311,		unknown
sp1208	positive	683.1	521.181	2.22	521.1805,170.1644,162.1353,503.0782,152.1686,665.1252,134.1458,188.0774,		unknown
sp1209	positive	683.1	537.187	1.94	537.1867,519.1366,521.3569,170.1183,449.2301,152.0688,488.6872,664.97,		unknown
sp121	Positive	157	130	2.18	130,142.1726,128.2103,115.0546,129.199,82.9433,97.0036,95.0894,		unknown
sp1212	positive	689.1	527.045	2.38	527.045,680.0493,671.3014,653.0113,586.947,479.0183,551.4059,430.8037,		unknown
sp1215	Positive	689.2	331	4.86	331,689.1528,329.063,509.0356,491.1645,527.0264,671.1408,151.0777,	Tricin 4'-O-(β-guaiacylglyceryl) ether O-hexoside	Flavonoid	putatively annotated
sp1216	Positive	689.2	331.1	4.38	331.1,671.0576,329.0359,527.1343,508.9473,658.726,661.3735,653.0401,		unknown
sp1217	Positive	689.2	331.1	4.52	331.1,689.1775,329.0229,491.187,509.129,527.3788,671.1365,590.0493,		unknown
sp1219	Positive	689.2	331.2	4.41	331.2,535.0696,679.105,517.2032,649.2966,667.228,331.1271,345.0229,		unknown
sp122	Positive	157	130	2.4	130,141.1645,98.9294,129.0876,72.8695,115.04,116.19,71.8863,	3-Indoleacetonitrile	Indole derivatives	putatively annotated
sp1224	positive	698.1	359.184	7.9	359.1836,617.47,536.4247,278.16,657.2183,637.7655,261.12,437.04,		unknown
sp1225	positive	699.1	188.101	1.8	188.1014,162.1323,681.094,501.216,537.2281,205.9969,519.1304,211.1652,		unknown
sp1226	Positive	699.2	331.1	4.83	331.1,	Tricin O-sinapoylhexoside	Flavonoid	putatively annotated
sp1227	positive	700.1	538.307	1.81	538.3073,520.139,682.2284,152.0984,162.1232,170.1995,188.04,502.2192,		unknown
sp123	positive	158.1	77.0136	6.29	77.0136,98.9687,117.0375,143.1812,57.8487,115.0333,135.0343,141.1453,		unknown
sp1231	positive	702.1	540.328	7.9	540.3283,407.7,354.7654,604.08,684.1586,597.72,679.32,474.12,		unknown
sp1233	positive	703.1	541.105	2.33	541.1045,685.22,622.1707,661.1022,643.2562,524.0435,397.56,669.8401,		unknown
sp124	Positive	146.085	87	0.87	87,87.048,128.1693,69.0053,111.079,83.0333,84.2945,102.8801,	4-Guanidinobutyric acid	Organic acids	putatively annotated
sp1244	positive	711.1	549.141	1.77	549.1415,162.1933,188.0932,495.0892,513.2188,693.2278,531.1281,332.1,		unknown
sp1245	positive	711.1	635.117	2.86	635.1168,617.181,188.1118,693.0565,268.1154,630.0912,548.8232,124.0435,		unknown
sp1246	positive	713.1	551.164	2.1	551.1639,184.2,188.1047,162.0923,166.2041,533.2267,695.1489,332.0493,		unknown
sp125	Positive	161.1	144	2.74	144,144.1706,102.9404,145.1408,105.0768,115.1225,60.9573,127.9482,	L-Tryptamine	Tryptamine derivatives	putatively annotated
sp1251	positive	719.1	224.125	8.32	224.1246,489.9347,701.1964,666.2852,602.16,660.4378,636.9945,165.2057,		unknown
sp1258	positive	735.1	206.111	2.29	206.111,188.1035,162.191,350.1216,699.03,572.9795,178.1834,332.0018,		unknown
sp126	positive	161.1	83.0195	0.69	83.0195,100.9468,143.0902,125.0422,145.5922,119.0323,105.16,98.76,		unknown
sp1265	positive	737.1	207.165	4.18	207.1649,175.0834,351.1124,369.1249,679.5568,147.1408,719.1511,575.1824,		unknown
sp1267	Positive	741.2	147.3	3.99	147.3,463.2134,753.2622,609.0486,301.0588,419.1213,588.1505,717.3959,	C-hexosyl-apigenin O-p-coumaroylhexoside	Flavonoid	putatively annotated
sp1269	positive	747.1	409.217	4.24	409.2171,585.1443,379.23,513.36,577.08,738.12,465.9741,729.0141,		unknown
sp127	positive	161.1	133.101	1.24	133.1008,104.0681,101.04,160.1118,60.8967,118.98,146.7019,78.892,		unknown
sp1272	positive	763.1	515.433	8.15	515.4327,104.1253,606.9532,485.9013,478.6357,313.859,240.2041,359.28,		unknown
sp1274	positive	766.1	766.085	2.08	766.0851,748.265,705.9438,622.1264,601.6583,613.887,604.0543,757.2177,		unknown
sp1275	positive	770.1	193.139	9.38	193.1388,149.0639,582.24,341.0401,140.4,505.9414,621.96,717.48,		unknown
sp1277	positive	770.1	496.312	8.31	496.3116,104.1276,478.3581,184.212,549.2319,416.928,342.3828,652.235,		unknown
sp1279	Positive	771.1	463.2	3.3	463.2,433.1149,415.103,313.0217,177.1643,339.0681,337.0675,378.9579,		unknown
sp1281	positive	772.1	434.202	4.05	434.2022,177.0676,314.0981,416.1829,754.2097,592.1844,145.1418,338.0857,		unknown
sp1282	Positive	772.1	496.2	8.09	496.2,753.1622,618.1598,606.1462,723.2012,741.2534,725.3665,711.087,		unknown
sp1283	Positive	772.1	496.2	8.26	496.2,	PC 19:2/16:0	lipids	putatively annotated
sp1284	positive	775.1	713.055	1.8	713.055,765.9117,757.0916,613.2965,562.5668,288.96,697.32,374.16,		unknown
sp1286	positive	777.1	717.466	4.18	717.4656,535.127,774.5721,759.2303,768.532,741.24,745.2045,684.48,		unknown
sp1288	positive	787.1	768.725	0.69	768.7246,744.8585,679.0801,726.8687,661.92,771.2118,611.4798,640.1926,		unknown
sp129	Positive	189.2	126	0.85	126,		unknown
sp1293	positive	794.1	632.269	2.45	632.2695,265.1006,177.1281,188.0639,776.1495,596.561,248.0504,144.9523,		unknown
sp1299	Positive	801	207.1	3.92	207.1,463.0963,321.0327,207.0818,639.1719,167.1213,783.0132,149.2722,	8-C-hexosyl-chrysoeriol O-feruloylhexoside	Flavonoid	putatively annotated
sp130	Positive	162	74	1.05	74,144.2753,121.1073,134.1433,116.1038,74.028,84.084,100.0161,	N-Acetylthreonine	Amino acid derivatives	putatively annotated
sp1300	Positive	801	301.2	4.46	301.2,357.0309,504.9829,356.0968,281.4929,729.24,341.04,415.1029,	8-C-hexosyl-apigenin O-sinapoylhexoside	Flavonoid	putatively annotated
sp1301	positive	801.1	301.01	4.51	301.0103,463.1962,321.12,207.0912,339.1555,175.2973,354.9874,167.1294,		unknown
sp1302	Positive	801.1	445.3	3.96	445.3,719.8528,355.0688,791.9112,696.0913,703.2528,764.8726,474.9278,	6-C-hexosyl-chrysoeriol O-feruloylhexoside	Flavonoid	putatively annotated
sp1303	positive	802.1	301.023	4.51	301.0231,464.0877,784.2144,207.1306,793.2422,742.8177,321.9768,167.4659,		unknown
sp1304	positive	804.1	786.245	2.63	786.2448,636.2716,618.3734,614.1046,641.9736,189.1376,623.0544,431.1623,		unknown
sp1305	positive	809.1	520.39	8	520.3896,184.224,577.9583,125.0707,630.9526,502.8846,681.5226,749.0679,		unknown
sp1309	positive	824.1	188.137	2.18	188.1372,422.1574,350.1096,162.12,458.1454,205.1467,332.1047,404.1563,		unknown
sp131	Positive	162.05	117.994	4.14	117.994,116.0617,134.1681,147.1337,118.1143,106.2382,89.0438,91.0055,		unknown
sp1313	Positive	831	207.1	4.42	207.1,527.1378,331.0387,639.1105,817.0174,491.1118,689.0649,787.1069,		unknown
sp1318	positive	842.1	617.108	3.12	617.108,635.1461,268.2067,162.159,188.1077,824.223,455.1501,124.3172,		unknown
sp132	Positive	505.169	163	0.83	163,130.9903,147.1706,487.259,489.0492,445.1056,161.027,423.0126,	D(+)-Melezitose	Carbohydrates	putatively annotated
sp1321	positive	858.1	617.087	2.74	617.0872,635.1292,840.2105,659.0483,822.12,162.0697,188.1422,581.2855,		unknown
sp1329	positive	887.1	797.21	2.89	797.2096,725.1191,779.2225,635.055,617.0566,268.0702,868.9242,581.0404,		unknown
sp133	Positive	162.1	97.9	0.82	97.9,102.8993,144.1684,69.9862,126.1711,101.9766,116.152,87.1097,	2-Aminoadipic acid (L-Homoglutamic acid)	Amino acids	putatively annotated
sp1339	Positive	933.1	914.8	0.69	914.8,914.7526,854.868,872.8734,896.8737,813.0102,790.7257,788.6431,		unknown
sp1345	positive	957.1	490.228	7.44	490.2285,431.201,104.1975,482.4,897.12,		unknown
sp1346	positive	962.1	468.315	7.44	468.3145,104.1143,870.3024,935.5884,767.9786,728.16,493.5383,660.12,		unknown
sp135	positive	164.1	123.001	0.68	123.0014,63.844,78.9368,119.9856,141.0439,104.9976,146.1,72.8069,		unknown
sp1357	Positive	271.292	105	12.22	105,163.1905,149.232,161.2325,121.2887,80.9943,187.158,147.217,	1-Octadecanol	lipids	putatively annotated
sp136	Positive	165.047	119	3.67	119,119.1363,91.0243,82.9316,124.0345,65.0145,77.0245,123.1024,	p-Coumaric acid	Hydroxycinnamoyl derivatives	putatively annotated
sp1360	Positive	279.2	95.1	9.64	95.1,95.0596,109.1388,66.9586,78.9706,123.2132,149.1671,261.2378,	α-Linolenic acid	lipids	putatively annotated
sp1365	Positive	353.2	261.3	9.14	261.3,243.2367,135.2215,131.1818,79.0713,335.2114,149.1623,161.2686,	MAG (18:3) isomer1	lipids	putatively annotated
sp1367	Positive	387.1	331.1	7.12	331.1,225.9733,326.9124,256.9823,312.9668,351.3656,333.1865,305.3818,	Cholesterol	lipids	putatively annotated
sp1370	Positive	426.26	285.24	7.35	285.24,408.2769,426.2451,365.3032,254.157,155.0682,89.16,216.1692,	lysoPE 14:0 (sn-1)	lipids	putatively annotated
sp1371	Positive	440.28	299.26	7.78	299.26,164.2629,328.0147,184.2768,283.2523,212.2022,156.3174,202.3104,	LysoPE 15:0	lipids	putatively annotated
sp1372	Positive	440.3	184.1	6.53	184.1,422.0346,308.7789,398.8568,341.8182,233.7543,320.4001,314.6851,	LysoPC 12:0	lipids	putatively annotated
sp1373	Positive	452.27	311.26	7.6	311.26,137.1007,301.0303,433.1227,331.127,289.5894,352.9673,298.86,	LysoPE 16:1	lipids	putatively annotated
sp1374	Positive	454.2	313.3	8.23	313.3,451.2163,339.2631,391.1856,283.1593,169.1294,88.9848,133.2575,	lysoPE 16:0 (sn-1)	lipids	putatively annotated
sp1375	Positive	466.29	325.27	7.92	325.27,	LysoPC 14:1	lipids	putatively annotated
sp1377	Positive	468.1	184.4	7.39	184.4,450.3216,125.0413,86.068,104.04,285.2217,386.093,300.12,	lysoPC 14:0 (sn-1)	lipids	putatively annotated
sp1378	Positive	468.3	184	7.22	184,133.1461,451.2955,212.176,134.2514,184.2625,177.2516,450.1822,	lysoPC 14:0 (sn-2)	lipids	putatively annotated
sp1379	Positive	468.3	327.3	8.68	327.3,184.1498,450.3329,104.1165,125.0444,285.1841,86.175,391.2169,	lysoPE 17:0 (sn-1)	lipids	putatively annotated
sp1380	Positive	476.28	335.26	7.32	335.26,	LysoPE 18:3	lipids	putatively annotated
sp1381	Positive	476.3	44.05	7.46	44.05,	LysoPE(18:3)	lipids	putatively annotated
sp1382	Positive	478.25	306.28	7.74	306.28,121.1006,65.0102,91.0636,107.1246,77.0255,151.0927,93.0215,	lysoPE 18:2 (sn-2)	lipids	putatively annotated
sp1383	Positive	478.3	337.3	7.9	337.3,121.0919,151.1504,107.1439,64.9969,93.0309,76.9696,105.0812,	lysoPE 18:2 (sn-1)	lipids	putatively annotated
sp1384	Positive	478.6	460.6	7.9	460.6,121.0967,90.9643,64.9911,76.9519,151.0604,93.08,105.0508,	LysoPE 18:2 (2n isomer)	lipids	putatively annotated
sp1385	Positive	480.1	184.5	7.35	184.5,104.061,462.3037,125.0147,85.9926,269.9701,463.56,86.9297,	lysoPC 15:1 (sn-1)	lipids	putatively annotated
sp1386	Positive	480.15	339.29	8.3	339.29,	lysoPE 18:1 (sn-2)	lipids	putatively annotated
sp1387	Positive	480.3	184.1	7.19	184.1,	lysoPC 16:0p	lipids	putatively annotated
sp1388	Positive	480.31	339.29	8.45	339.29,	lysoPE 18:1 (sn-1)	lipids	putatively annotated
sp139	Positive	166	102	0.69	102,125.1291,83.0026,102.0407,124.1088,80.9069,122.0762,101.0568,	Methionine sulfoxide	Amino acid derivatives	putatively annotated
sp1390	Positive	482.3	184.1	7.82	184.1,464.1656,147.1652,458.4205,137.1242,286.459,365.391,473.427,	lysoPC 15:0 (sn-1)	lipids	putatively annotated
sp1391	Positive	482.3	184.1	7.65	184.1,382.0874,350.88,283.48,148.2,321.84,363.24,365.3215,	lysoPC 15:0 (sn-2)	lipids	putatively annotated
sp1392	Positive	492.3	184	7.19	184,184.1412,474.0589,460.1993,432.5145,161.7323,477.1201,464.0504,	LysoPC 16:2 (2n isomer)	lipids	putatively annotated
sp1393	Positive	492.308	184	7.19	184,	LPC(1-acyl 16:2)	lipids	putatively annotated
sp1394	Positive	492.31	184.07	7.04	184.07,184.1631,432.2627,104.1634,474.1956,256.0583,451.185,379.7311,	LysoPC 16:2	lipids	putatively annotated
sp1395	Positive	494.33	184.07	7.48	184.07,463.8188,431.2092,472.8064,449.25,478.3611,104.1528,184.182,	lysoPC 16:1 (sn-2)	lipids	putatively annotated
sp1396	Positive	494.37	184.07	7.64	184.07,453.2453,434.1673,476.22,297.12,210.1772,184.188,330.2187,	lysoPC 16:1 (sn-1)	lipids	putatively annotated
sp1398	Positive	496.33	184	8.12	184, 184.1576, 478.3309, 104.1295, 124.9, 313.3756, 86.0682, 258.0343,	lysoPC 16:0 (sn-2)	lipids	putatively annotated
sp1399	Positive	500.3	359.3	7.76	359.3,	lysoPE 20:5 (sn-1)	lipids	putatively annotated
sp1400	Positive	500.3	359.3	7.89	359.3,	lysoPE 20:5 (sn-2)	lipids	putatively annotated
sp1401	Positive	508.3	184.07	7.9	184.07,	lysoPC 17:1 (sn-2)	lipids	putatively annotated
sp1402	Positive	508.3	184.1	8.07	184.1,	lysoPC 17:1 (sn-1)	lipids	putatively annotated
sp1403	Positive	510.1	184.4	8.72	184.4,492.2651,125.0237,424.92,487.6268,327.4568,104.1975,452.2583,	lysoPC 17:0 (sn-1)	lipids	putatively annotated
sp1405	Positive	518.2	184.1	7.35	184.1,500.2845,331.0647,104.1717,173.2369,321.6232,481.153,354.1263,	lysoPC 18:3 (sn-2)	lipids	putatively annotated
sp1406	Positive	518.323	184.1	7.49	184.1,459.3058,462.2319,313.3145,147.0819,364.2,444.1488,321.225,	lysoPC 18:3 (sn-1)	lipids	putatively annotated
sp1407	Positive	520.15	184.05	7.8	184.05,86.2029,124.9237,71.04,502.2,	lysoPC 18:2 (sn-2)	lipids	putatively annotated
sp1409	Positive	522.12	184.07	8.48	184.07,504.3527,104.1082,125.064,339.6171,86.0344,455.1459,258.0639,	lysoPC 18:1 (sn-1)	lipids	putatively annotated
sp141	Positive	191.095	128	0.82	128,174.21,148.152,162.0999,161.1822,128.1651,160.1249,188.28,	2,6-Diaminooimelic acid	Amino acid derivatives	putatively annotated
sp1411	Positive	522.33	184.07	8.32	184.07,504.3393,125.0888,86.0976,185.248,104.1696,445.08,240.24,	lysoPC 18:1 (sn-2)	lipids	putatively annotated
sp1413	Positive	524.36	184.07	9	184.07,506.2995,184.1348,104.0278,186.1619,185.1635,105.0453,106.1262,	lysoPC 18:0 (sn-2)	lipids	putatively annotated
sp1415	Positive	544.4	485.2	8.5	485.2,485.2167,339.2875,147.073,361.2908,104.054,535.68,86.1,	LysoPC 20:4	lipids	putatively annotated
sp1416	Positive	548.37	184.07	8.72	184.07,	lysoPC 20:2 (sn-1)	lipids	putatively annotated
sp1417	Positive	550.37	184	9.16	184,490.4353,458.3148,448.0733,489.2756,446.2845,104.0458,532.2525,	lysoPC 20:1 (sn-2)	lipids	putatively annotated
sp1421	Positive	666.44	184.07	9.06	184.07,651.0771,177.0969,633.1978,506.9739,621.237,605.0756,151.1862,	2-[(8-Carboxyoctanoyl)oxy]-3-(palmitoyloxy)propyl 2-(trimethylammonio)ethyl phosphate	lipids	putatively annotated
sp143	Positive	167.1	121.1	1.67	121.1,149.078,76.9783,133.0541,126.0124,107.0341,84.9681,123.0792,		unknown
sp1431	Positive	774.6	184.01	8.26	184.01,664.1274,684.6596,606.2974,687.0671,697.0095,617.4324,531.9389,	PC 19:1/16:0 or 20:1/15:0	lipids	putatively annotated
sp1435	Positive	204.1	85.05	0.84	85.05,163.1441,164.063,102.9073,123.024,78.9291,149.1764,87.0178,	Acylcarnitine 2:0	lipids	putatively annotated
sp1436	Positive	480.3	184.1	7.34	184.1,	lysoPC 15:1 (sn-1)	lipids	putatively annotated
sp1437	Positive	480.3	184.1	7.19	184.1,	lysoPC 16:0p	lipids	putatively annotated
sp1438	Positive	496.3	184.1	8.08	184.1,455.2211,478.3342,184.1573,185.266,104.1251,105.1622,433.0934,	lysoPC 16:0 (sn-2)	lipids	putatively annotated
sp1439	Positive	494.3	184.1	7.48	184.1,476.2184,184.1639,104.1151,453.1423,435.1662,243.065,150.9924,	lysoPC 16:1 (sn-2)	lipids	putatively annotated
sp1440	Positive	510.4	184.1	8.54	184.1,184.187,104.112,285.0531,331.0972,373.974,390.5865,177.1201,	lysoPC 17:0 (sn-2)	lipids	putatively annotated
sp1442	Positive	508.3	184.1	8.06	184.1,	lysoPC 18:0p	lipids	putatively annotated
sp1444	Positive	522.4	184.1	8.34	184.1,269.9796,184.1923,504.3742,481.2754,268.9786,281.2199,437.0105,	lysoPC 18:1 (sn-2)	lipids	putatively annotated
sp1445	Positive	520.3	184.1	7.8	184.1,502.3737,104.0949,337.443,86.0638,443.177,125.0035,185.0443,	lysoPC 18:2 (sn-2)	lipids	putatively annotated
sp1446	Positive	518.3	184.1	7.35	184.1,184.1705,477.0858,353.8065,486.1212,467.2071,147.0816,338.0338,	lysoPC 18:3 (sn-2)	lipids	putatively annotated
sp1449	Positive	548.4	184.1	8.57	184.1,	lysoPC 20:2 (sn-2)	lipids	putatively annotated
sp1452	Positive	426.3	285.3	7.18	285.3,	lysoPE 14:0 (sn-2)	lipids	putatively annotated
sp1453	Positive	454.3	313.3	8.05	313.3,282.3214,413.1031,394.1713,94.9006,436.1938,124.7015,380.28,	lysoPE 16:0 (sn-2)	lipids	putatively annotated
sp1454	Positive	482.3	341.3	8.44	341.3,184.1396,464.3771,283.1079,422.2122,314.29,408.0962,124.9371,	lysoPE 18:0 (sn-2)	lipids	putatively annotated
sp1455	Positive	480.3	339.3	8.3	339.3,	lysoPE 18:1 (sn-2)	lipids	putatively annotated
sp1456	Positive	478.3	337.3	7.75	337.3,121.1122,64.9825,151.1018,91.0256,133.0644,92.9987,77.0198,	lysoPE 18:2 (sn-2)	lipids	putatively annotated
sp1457	Positive	500.3	359.3	7.89	359.3,	lysoPE 20:5 (sn-2)	lipids	putatively annotated
sp1458	Positive	289.2	85.05	0.8	85.05,153.1284,163.1801,271.187,135.0869,159.0845,137.2887,197.0648,	Acylcarnitine 8:0	lipids	putatively annotated
sp1459	Positive	373.3	85.05	7.96	85.05,357.0121,268.9515,313.2817,157.095,271.0263,171.159,337.189,	Acylcarnitine 14:0	lipids	putatively annotated
sp146	positive	168.1	120.185	1.67	120.1849,102.9753,127.0238,105.1889,84.8646,76.9694,93.1929,		unknown
sp1464	Positive	104.1	60.1	0.771	60.1,57.9924,87.0516,68.904,85.9515,56.084,61.04,71.3314,	Choline	Vitamine	standard
sp1472	Positive	118.2	59	0.807	59,100.906,90.9333,68.9806,60.9508,58.0087,102.975,78,	Betaine	Alkaloids	standard
sp1476	Positive	121.1	104.1	1.63	104.1,105.1253,80.9715,103.97,107.1745,76.98,106.105,78.9698,	Benzamidine	Others	standard
sp1477	Positive	122	105	2.14	105,76.94,106.0541,77.9788,92.1133,94.06,104.1267,120.2411,	Cysteine	Amino acids	standard
sp1479	Positive	124.04	80.0502	1.04	80.0502,108.0947,67.95,79.9371,78.0789,97.9236,65.8752,56.885,	Nicotinic acid	Vitamine	standard
sp148	Positive	169.042	65	3.08	65,151.0787,128.0323,141.0976,92.948,153.1444,111.0984,154.288,	Vanillic acid	Hydroxycinnamoyl derivatives	putatively annotated
sp1480	Positive	130	69.9	0.85	69.9,84.093,60.9887,72.8817,88.9594,71.8827,69.9964,68.3384,	Homoproline	Amino acids	standard
sp1481	Positive	130.086	84.0814	0.877	84.0814,102.9811,83.9931,77.0412,70.9117,72.8204,101.9842,88.9059,	Pipecolinic acid	Others	standard
sp1482	Positive	130.1	84.2	0.87	84.2,84.0271,69.9491,128.0865,102.8987,76.928,86.055,88.4671,	1-Amino-1-cyclopentanecarboxylic acid	Amino acid derivatives	putatively annotated (by GGM)
sp1483	Positive	132.1	86.1	1.11	86.1,69.0176,72.8973,66.9752,90.8812,114.1335,71.8338,89.976,	L-Leucine	Amino acids	standard
sp1485	Positive	132.2	86.2	1.11	86.2,69.0003,72.8996,66.9673,71.9271,114.335,90.99,60.9601,	L-Isoleucine	Amino acids	standard
sp1488	Positive	133	70.1	0.785	70.1,72.9104,115.0282,117.9891,116.188,105.1858,82.9697,90.92,	Ornithine	Amino acids	putatively annotated (by GGM)
sp149	Positive	169.09	134	0.79	134,134.1221,152.1193,66.0207,126.159,96.012,124.0689,128.0332,	4-(Aminomethyl)-5-(hydroxymethyl)-2-methylpyridin-3-ol	Others	putatively annotated
sp1490	Positive	134	73.9	0.786	73.9,106.0523,74.3262,72.92,76.129,64.8821,113.0113,94.5601,	beta-Homothreonine	Amino acids	putatively annotated
sp1493	Positive	136.1	119.1	1.05	119.1,92.0214,109.1187,94.0094,64.9837,108.0146,76.9553,78.104,	Adenine	Nucleotide and its derivates	standard
sp1494	Positive	137.3	94.2	1.07	94.2,137.058,81.0047,102.94,94.508,76.9583,109.1477,79.0329,	1-Methylnicotinamide	Vitamine	putatively annotated
sp1495	Positive	138.055	108	3.25	108,123.2098,108.1103,121.1173,93.0613,106.934,93.9723,79.0303,	Methyl Nicotinate	Others	standard
sp1497	Positive	138.091	121.1	1.26	121.1,123.2367,72.93,108.1566,93.9387,121.1481,120.1109,82.0566,	L-Tyramine	Amino acids	standard
sp1499	Positive	138.1	94.2	0.813	94.2,123.1564,108.105,121.2094,94.02,107.1153,72.8233,93.1168,	Trigonelline	Alkaloids	standard
sp1500	Positive	139	122	1.16	122,93.044,69.0493,123.2333,97.0776,77.04,90.9913,82.9657,	p-Nitroaniline	Others	putatively annotated
sp1502	Positive	144.1	113.1	2.19	113.1,127.1726,115.1905,79.28,125.1956,106.992,104.8804,141.16,	4-Methyl-5-thiazoleethanol	Vitamine	putatively annotated (by GGM)
sp1503	Positive	146	86	0.851	86,104.9154,86.0803,75.9389,118.0172,113.9359,89.8875,103.7769,	Acetylcholine	Vitamine	standard
sp1504	Positive	146.1	118.1	2.15	118.1,91.0553,60.9524,117.0617,118.0639,76.9338,102.9041,103.92,	Indole-3-carboxaldehyde	Amino acid derivatives	standard
sp1505	Positive	146.1	86.1	0.85	86.1,128.0942,104.0358,118.0873,91.0095,117.15,102.96,121.136,	beta-Homoisoleucine	Amino acids	putatively annotated (by GGM)
sp1506	Positive	146.1	100.2	0.81	100.2,76.9829,91.043,128.0661,118.1606,117.1971,104.0229,102.9891,	4-Guanidinobutanoate	Amino acid derivatives	putatively annotated
sp1508	Positive	147	88	0.85	88,119.1464,105.0076,64.9595,106.154,115.095,131.1271,103.0397,	Carbachol	Vitamine	putatively annotated
sp1512	Positive	148.06	84.1	0.795	84.1,130.106,101.9885,112.0845,86.024,67.7233,82.239,93.9833,	O-Acetyl-L-serine	Others	putatively annotated
sp1515	Positive	150.2	61.2	0.876	61.2,60.9434,86.9052,102.0533,122.1689,85.0968,104.1371,94.0326,	L-Methionine	Amino acids	standard
sp1517	Positive	152	135	1.35	135,110.0559,134.0679,109.128,110.9362,79.9434,108.04,124.2375,	Guanine	Nucleic acid	standard
sp1518	Positive	153	110	1.12	110,136.1077,80.8996,134.9592,81.8958,117.1218,125.038,83.9,	Xanthine	Nucleic acid	standard
sp1519	Positive	153.054	65.1	3.57	65.1,83.8767,111.1475,135.0867,110.1217,79.0309,91.0222,76.9867,	Vanillin	Polyphenol	putatively annotated
sp152	Positive	170.1	124	0.87	124,128.0357,152.1446,91.936,153.2363,109.9259,85.9244,	1-Methylhistidine	Amino acid derivatives	putatively annotated
sp1520	Positive	153.127	81.1	10.1	81.1,65.8728,83.8734,98.9845,96.9148,153.0818,112.0469,70.9869,	(-)-trans-Carveol	Others	putative
sp1523	Positive	157	130	1.32	130,115.0403,72.909,73.9396,70.8354,134.0422,71.9267,113.0357,	3-Indoleacetonitrile	Phytohormone	putatively annotated (by GGM)
sp1524	Positive	161.107	144.2	2.7	144.2,145.1236,133.1157,131.0568,160.12,159.0574,120.1399,91.0339,	L-Tryptamine	Amino acids	standard
sp1526	Positive	162.1	74.1	1.04	74.1,146.1498,121.14,161.0329,135,118.92,145.16,160.1673,	Carnitine	Others	putatively annotated
sp1527	Positive	165.054	95.1	1.04	95.1,95.0493,77.0131,119.0912,91.0726,147.106,83.0382,102.9694,	p-Coumaric acid	Polyphenol	putative
sp1528	Positive	165.2	147	1.08	147,95.0297,77.0113,90.984,147.1126,119.1074,83.021,102.9892,	4-Coumaric acid	Polyphenol	standard
sp1529	Positive	165.2	147	10.1	147,119.1424,105.1314,79.0225,91.0704,81.117,137.1761,67.0312,	4-Coumaric acid	Polyphenol	standard
sp1530	Positive	166.2	120.1	1.62	120.1,102.9779,77.003,93.1089,91.08,78.8712,124.9255,107.0429,	L-Phenylalanine	Amino acids	standard
sp1532	Positive	170.1	134.1	1.04	134.1,129.0956,111.0594,93.1556,85.8854,96.9742,69.9493,67.8332,	Pyridoxine	Vitamine	standard
sp1534	Positive	174.2	114	0.844	114,132.2169,158.22,130.1657,117.1527,118.1661,159.2206,145.1965,	N-Acetyl-L-leucine	Amino acid derivatives	putatively annotated (by GGM)
sp1535	Positive	175.2	116.1	0.718	116.1,70.0593,116.1151,114.995,130.1474,82.9282,157.1751,72.9527,	L-Arginine	Amino acids	standard
sp1537	Positive	176.1	130	4.36	130,116.1909,148.1229,115.1529,133.2355,92.1103,132.0508,98.9664,	IAA	Phytohormone	standard
sp1538	Positive	177.2	160.2	1.66	160.2,135.0733,115.0764,117.0637,177.1438,137.0563,132.1694,104.947,	Serotonin	Amino acid derivatives	standard
sp154	Positive	189.105	97	4.25	97,174.1605,125.1637,161.1039,171.1729,173.1983,105.1352,159.2055,	Azelaic acid	Organic acids	putatively annotated
sp1540	Positive	177.2	160.1	1.66	160.1,135.11,117.0613,115.0749,177.1271,132.18,137.0852,159.0835,	N-hydroxy tryptamine	Amino acid derivatives	putatively annotated (by GGM)
sp1544	Positive	181	163	8.84	163,152.1171,134.1306,120.1337,92.1135,138.0043,179.1314,80.9232,	Caffeic acid	Polyphenol	standard
sp1546	Positive	181.1	135.1	5.9	135.1,123.2095,163.2176,121.1266,180.1429,125.0271,124.1493,90.9984,	Guanine derivative	Nucleotide and its derivates	putatively annotated
sp1547	Positive	182.2	91.2	1.07	91.2,91.0696,119.0658,123.1272,95.0246,147.1252,165.1666,77.0318,	L-Tyrosine	Amino acids	standard
sp1549	Positive	183	136.9	1.07	136.9,137.1676,92.083,140.9494,120.1383,159.0682,76.92,124.12,	Ethyl 3,4-dihydroxybenzoate	Polyphenol	putatively annotated
sp1550	Positive	184	125	8.08	125,104.1567,98.9844,86.0366,101.9417,111.0928,70.9973,106.0263,	O-Phosphocholine	Vitamine	standard
sp1551	Positive	190	130	0.939	130,	N-Acetyl-DL-glutamic acid	Amino acid derivatives	putatively annotated
sp1552	Positive	190.05	144	0.81	144,84.0615,144.2025,151.0575,131.1646,149.16,73.1,87.8113,	Kynurenic acid	Amino acid derivatives	standard
sp1553	Positive	191.103	84.1	0.8	84.1,128.1407,174.1877,98.9812,130.1012,173.1355,111.0012,127.1318,	DL-alpha,epsilon-Diaminopimelic acid	Others	putative
sp1555	Positive	192.065	146.06	3.31	146.0596,149.0667,132.9644,130.9917,98.94,72.892,85.0438,135.135,	2-(5-hydroxy-1H-indol-3-yl)acetic acid	Others	putatively annotated
sp1556	Positive	193.1	111	0.56	111,107.1496,149.1344,175.2538,105.0045,109.0991,133.0592,123.1809,	Quinic acid	Polyphenol	standard
sp1557	Positive	195.1	145	3.9	145,145.1249,117.1109,89.0245,136.1251,149.1672,135.1449,134.0586,	Ferulic acid	Polyphenol	standard
sp1559	Positive	203.1	143.9	4.46	143.9,115.1032,175.2,185.126,172.153,160.1743,147.1123,131.1026,	N-Acetyltryptamine	Amino acid derivatives	putatively annotated (by GGM)
sp156	Positive	291	139	2.81	139,123.1431,147.1797,165.1374,161.1418,207.1297,119.0421,111.2205,	L-Epicatechin	Catechin derivatives	putatively annotated
sp1560	Positive	203.2	84.1	0.677	84.1,82.9944,102.9018,162.0562,161.1326,101.0256,115.0672,121.0286,	Spermine	Polyamine	standard
sp1561	Positive	204.065	162	8.45	162,185.2591,175.203,145.1214,146.2125,105.0103,133.1733,142.234,	4-Hydroxy-6-methylquinoline-3-carboxylic acid	Amino acid derivatives	putative
sp1562	Positive	205.2	146.2	2.15	146.2,121.1005,149.1465,135.157,93.0069,175.1555,105.0942,187.1596,	L-Tryptophan	Amino acids	standard
sp1564	Positive	206	160	2.16	160,147.1232,188.0935,124.0442,191.12,135.6788,108.164,119.1262,	Methoxy indoleacetic acid	Phytohormone	putatively annotated (by GGM)
sp1565	Positive	206	178	0.597	178,	Xanthurenic acid	Amino acid derivatives	putatively annotated (by GGM)
sp1566	Positive	209	106	1.46	106,91.006,149.1059,106.0538,177.1572,163.1937,148.2095,78.0514,	Nicotinoylcholine	Vitamin derivative	putatively annotated (by GGM)
sp1569	Positive	213.2	79	5.7	79,151.1405,137.0479,135.0407,110.0784,121.1608,125.0746,131.0713,	Vanillactic acid	Others	putatively annotated
sp157	Positive	132	86	1.09	86,72.901,90.842,89.8662,114.0144,69.0831,71.8245,69.98,	L-Isoleucine	Amino acids	putatively annotated
sp1570	Positive	217.2	144	2.69	144,155.1304,145.048,159.1228,83.1454,98.9302,128.2338,161.1991,	Lycoperodine	Others	putatively annotated
sp1571	Positive	220.118	202.1	1.85	202.1,133.1381,205.2168,175.9056,204.1855,160.7047,158.7309,135.1467,	D-Pantothenic acid	Others	standard
sp1573	Positive	221	143	0.656	143,83.9566,203.2036,221.065,175.152,74.0894,157.22,92.0728,	4, 7, 10-Trioxa-1,13-tridecanediamine	Others	putatively annotated
sp1574	Positive	221.1	158.4	1.35	158.4,137.0179,179.0921,139.0682,135.17,178.125,116.9766,119.013,	N-Hydroxy-L-tryptophan	Amino acid derivatives	putatively annotated (by GGM)
sp1575	Positive	223.1	88.1	0.787	88.1,173.1102,209.0788,88.9405,145.1221,191.0774,207.0274,211.0647,	Cystathionine	Amino acid derivatives	putatively annotated (by GM)
sp1576	Positive	225.076	147.1	3.9	147.1,209.1105,211.08,207.0857,91.1486,92.1083,137.16,94.0745,	Sinapic acid	Polyphenol	standard
sp1578	Positive	230.3	212.1	6.43	212.1,199.2269,185.1693,211.1112,187.6028,159.2743,186.2665,201.3114,	Dodecyl (dimethyl) amine oxide	Others	putatively annotated
sp1579	Positive	230.3	186.1	0.843	186.1,119.0581,159.24,192.998,173.2446,145.1753,133.2033,111.1509,	Ergothioneine	Amino acids	putatively annotated
sp158	Positive	175.1	83	3.58	83,115.0179,115.9777,72.854,133.0481,134.02,71.9954,91.1,	Suberic acid	Organic acids	putatively annotated
sp1580	Positive	235.1	147.2	2.45	147.2,119.1426,118.1018,115.0665,218.172,91.0335,133.1147,175.0774,	N-p-Coumaroylputrescine	Polyamine	putatively annotated
sp1581	Positive	235.1	179.1	8.23	179.1,118.1303,217.2385,161.1785,95.0278,91.05,80.9838,107.1463,	Polygodial	Polyphenol	putatively annotated
sp1583	Positive	235.169	179.2	8.23	179.2,235.1083,189.1361,115.0544,192.9696,132.9843,174.9986,217.1829,	Polygodial	Terpenoid	putative
sp1584	Positive	235.3	118.1	0.815	118.1,136.9515,196.0385,172.9788,116.06,155.1315,117.3464,177.0649,	Lysine butyrate	Amino acid derivatives	putatively annotated
sp1585	Positive	244.094	112.1	0.854	112.1,112.1005,114.9529,157.1831,147.0941,128.16,198.0157,133.0768,	Cytidine	Nucleotide and its derivates	putative
sp1587	Positive	247.107	130.1	0.846	130.1,201.2261,159.375,135.054,91.005,131.2032,191.1011,145.2692,	N-(3-Indolylacetyl)-L-alanine	Amino acid derivatives	standard
sp1588	Positive	251.139	163.2	2.14	163.2,233.1092,193.0871,151.1723,84.117,191.1256,177.215,195.0168,	N-Caffeoylputrescine	Phenolamides	putative
sp1589	Positive	252.1	136.1	1.75	136.1,237.1783,177.9788,222.075,236.07,234.21,224.1541,211.2114,	2'-Deoxyadenosine monohydrate	Nucleotide and its derivates	putatively annotated
sp1592	Positive	258.2	104.2	0.792	104.2,125.025,258.1339,184.1515,86.0413,166.1804,98.965,71.0165,	sn-Glycero-3-phosphocholine	Vitamin derivative	standard
sp1593	Positive	265.1	122.1	0.796	122.1,144.1355,265.0312,145.1376,81.0538,193.0259,163.0677,205.1221,	Thiamin	Vitamine	standard
sp1594	Positive	265.1	177.1	2.7	177.1,145.0332,117.108,248.1688,88.9992,149.1387,72.0255,247.08,	N-Feruloyl putrescine	Polyamine	putatively annotated
sp1595	Positive	265.1	144	6.2	144,181.0434,247.1964,207.2084,165.1265,208.0843,193.5638,	N-Benzoyltryptamine	Amino acid derivatives	putatively annotated
sp1598	Positive	268.1	136.1	1.65	136.1,184.1438,232.1292,202.1297,106.1585,186.1486,109.0357,248.1703,	Adenosine	Nucleotide and its derivates	standard
sp160	Positive	176	134	1.25	134,135.0282,158.1917,106.2394,153.0166,170.9716,73.0776,116.984,	N-Acetylaspartate	Amino acid derivatives	putatively annotated
sp1600	Positive	269	137	1.65	137,136.1498,120.0444,209.0767,138.1846,250.9553,139.783,241.92,	Inosine	Nucleic acid	standard
sp1601	Positive	269.1	135.9	1.65	135.9,136.1161,269.0905,119.1129,241.9765,223.1923,166.228,213.0786,	Homocystine	Amino acid derivatives	standard (by GGM)
sp1605	Positive	275.2	105.1	6.8	105.1,257.1321,105.0898,147.2322,159.2256,213.1892,133.1822,119.0931,	Apo-13-zeaxanthinone	Others	putative
sp1606	Positive	276.119	84.1	0.831	84.1,104.9962,135.36,121.071,93.2208,165.18,	Gamma-glutamyl Glutamine	Amino acid derivatives	putatively annotated (by GGM)
sp1607	Positive	277.1	84.1	0.829	84.1,105.097,78.9648,147.2452,93.0645,95.0369,107.1223,119.2391,	Saccharopine	Amino acid derivatives	standard (by GGM)
sp1609	Positive	277.216	93.1	8.37	93.1,107.1667,93.0836,135.1951,121.1885,79.0012,133.2045,91.0493,	14,15-Dehydrocrepenynic acid	lipids	putative
sp161	Positive	176.1	113	0.81	113,117.1294,98.982,170.9488,152.9694,130.0251,144.2078,158.1015,	L-Citrulline	Amino acids	putatively annotated
sp1610	Positive	279.171	86.0964	3.17	86.0964,149.1312,261.2053,201.106,219.1751,197.1435,203.1489,221.1577,	4beta-Hydroxy-11-O-(2'-pyrolylcarboxy)epilupinine	Alkaloids	putatively annotated
sp1612	Positive	279.232	95.0864	8.22	95.0864,81.0912,95.0807,66.9938,149.1585,79.0383,109.1363,135.097,	α-Linolenic acid	lipids	standard
sp1614	Positive	280.1	177.1	8.22	177.1,263.2014,109.0983,95.0519,81.0616,149.2179,105.1435,135.2489,	Feruloyl putrescine derivative	Polyamine	putatively annotated (by GGM)
sp1615	Positive	281.1	162.2	2.12	162.2,221.0109,161.0717,269.7493,99.0491,246.6074,251.9747,237.5817,	N-(9H-Purin-6-ylcarbamoyl)threonine	Nucleotide and its derivates	putative
sp1617	Positive	281.3	81.1	9.37	81.1,264.1993,246.2901,95.0443,81.0145,123.2079,109.252,67.0255,	Linoleic acid	lipids	standard
sp1618	Positive	281.3	160.1	4.85	160.1,265.1341,95.2816,263.2764,266.9366,81.0422,245.1683,136.5497,	N-Benzoylserotonin	Amino acid derivatives	putatively annotated (by GGM)
sp162	positive	176.1	71.029	0.75	71.029,117.1523,131.1852,159.1597,98.9929,73.0462,59.8862,113.0965,		unknown
sp1622	Positive	284.1	152.1	1.39	152.1,269.9062,231.2951,242.979,267.9767,250.8445,98.9136,271.9186,	Crotonoside	Nucleic acid	putatively annotated
sp1623	Positive	285	153	8.69	153,99.0113,267.1784,125.0565,135.1313,121.1219,268.9894,145.1498,	Xanthosine	Nucleic acid	standard
sp1624	Positive	289.071	163	4.87	163,153.1935,185.2131,163.158,243.1751,229.8288,247.9514,145.1184,	Spermidine derivative	Phenolamides	putative
sp1626	Positive	291.149	143.9	6.73	143.9,105.0879,135.2182,117.0706,227.1806,145.1149,91.1175,109.1382,	N-Cinnamoyltryptamine	Amino acid derivatives	putatively annotated (by GGM)
sp1628	Positive	292.202	147.1	2.81	147.1,135.5644,149.22,147.18,166.2033,91.0662,247.5231,171.1143,	N-p-Coumaroylspermidine	Phenolamides	putative
sp1629	Positive	293.162	163.2	9.39	163.2,81.0682,66.9628,79.123,109.1381,261.1774,149.1357,93.0337,	N-Caffeoylagmatine	Phenolamides	putative
sp163	positive	176.1	130.134	3.81	130.1342,146.1693,118.1242,160.1462,134.9261,98.9216,158.0218,148.1818,		unknown
sp1631	Positive	295.2	150.2	2.39	150.2,234.8945,192.9748,295.0811,136.2196,151.1025,166.1029,84.0509,	N-[Methyl(7H-purin-6-yl)carbamoyl]-L-threonine	Nucleotide and its derivates	putatively annotated (by GGM)
sp1633	Positive	298.096	136.1	2.68	136.1,262.2509,257.0669,148.174,244.2455,147.229,282.0387,98.9537,	5'-Deoxy-5'-(methylthio)adenosine	Nucleotide and its derivates	putative
sp1636	Positive	301.1	286	5.64	286,286.0086,272.8864,209.1203,283.0494,259.04,258.0782,181.0412,	Chrysoeriol	Flavonoid	standard
sp1637	Positive	301.2	283.3	7.51	283.3,240.2833,241.2658,88.0729,106.2497,149.1545,214.2363,266.1721,	Oryzalexin C	Terpenoid	putatively annotated
sp1639	Positive	303.195	137.2	6.93	137.2,137.1129,285.1175,243.152,153.1058,177.1667,145.1438,131.1795,	18-Nor-4,15-dihydroxyabieta-8,11,13-trien-7-one	Terpenoid	putative
sp164	positive	176.1	130.179	4.41	130.1787,134.9914,120.1951,170.9965,146.2023,116.9755,99.014,106.3439,		unknown
sp1640	Positive	304.15	185.3	0.789	185.3,285.2538,149.1204,88.0878,106.1512,255.2957,267.1693,145.1952,	Nicotianamine	Others	putative
sp1641	Positive	307.1	147.1	5.77	147.1,271.1614,151.2077,215.1299,289.1867,159.2209,205.381,265.029,	N-p-Coumaroyltryptamine	Amino acid derivatives	putatively annotated (by GGM)
sp1642	Positive	310	251	3.17	251,160.0023,268.872,98.9015,188.9366,226.9317,102.123,292.2711,	Sinapoylcholine	Vitamin derivative	putatively annotated (by GGM)
sp1643	Positive	310.113	292.3	0.807	292.3,137.0835,226.1832,292.1062,274.1346,112.8171,245.8661,84.9757,	N-acetylneuraminic acid	Others	putatively annotated
sp1645	Positive	312.3	180.2	2.02	180.2,151.1154,253.1394,159.2452,197.1447,225.18,267.1837,280.9754,	N2, N2-Dimethyguanosine	Nucleic acid	putatively annotated
sp1647	Positive	314.138	177.053	4.8	177.0529,285.9965,296.024,226.0955,258.1424,297.8183,129.2893,240.2307,	N-Feruloyltyramine	Amino acid derivatives	putatively annotated
sp1648	Positive	315.2	159.3	4.48	159.3,159.1319,257.24,255.2247,161.1604,165.1366,269.0862,177.192,	Progesterone	Terpenoid	putatively annotated
sp1649	Positive	315.2	271.2	7.78	271.2,253.2076,299.0763,107.1434,159.2133,149.16,256.0633,145.1072,	Momilactone A	Terpenoid	standard
sp165	Positive	177.2	160.3	1.72	160.3,159.2453,161.1977,149.2031,121.1964,90.9641,162.2215,147.1282,	N-hydroxy tryptamine	Tryptamine derivatives	putatively annotated
sp1653	Positive	318.3	256.263	6.46	256.2627,256.2823,300.259,102.0698,88.1358,69.952,146.1415,132.3107,	4-Hydroxysphinganine	Others	putatively annotated
sp1656	Positive	322.212	177.2	3.18	177.2,147.1138,303.0133,275.027,260.9483,157.0759,145,214.7614,	N-Feruloylspermidine	Phenolamides	putative
sp1657	Positive	323.139	147.043	4.6	147.0434,221.2531,119.149,179.1855,163.1775,107.1114,123.18,95.1559,	N-p-Coumaroylserotonin	Amino acid derivatives	putatively annotated (by GGM)
sp1658	Positive	324.2	162.1	0.853	162.1,325.0657,265.1244,145.13,117.1652,135.2243,307.0062,192.1052,	4,6-Dihydroxyquinoline O-hexoside	Amino acid derivatives	putative
sp166	Positive	178	161	1.7	161,91.0792,137.0105,161.1953,160.1445,56.8958,135.1309,100.7925,	N-formylmethionine	Amino acid derivatives	putatively annotated
sp1660	Positive	331.1	315	5.61	315,270.0792,313.14,286.0611,277.44,285.1346,118.9809,242.1939,	Tricin	Flavonoid	standard
sp1661	Positive	331.1	269.2	7.18	269.2,270.0263,286.995,242.191,312.8374,286.0383,299.0475,285.0796,	Momilactone B	Terpenoid	putatively annotated
sp1663	Positive	332.1	314.2	1.07	314.2,108.1301,152.1721,136.1991,124.1314,170.1469,134.136,154.14,	Zinolol	Polyphenol	putatively annotated
sp1664	Positive	332.134	314.1	1.06	314.1,188.1367,254.1934,272.9169,270.0559,137.6569,316.053,286.1319,	(-)-Norepinephrine N-hexoside	Others	putative
sp1665	Positive	332.134	314.2	1.06	314.2,74.0374,296.2514,270.2589,268.3051,122.16,88.0862,150.2534,	Pyridoxine O-glucoside	Vitamine	putative
sp1666	Positive	332.2	271.2	7.79	271.2,314.1834,316.0182,133.1443,134.1283,287.707,286.1441,146.0724,	Tricalysiamide B	Terpenoid	putatively annotated
sp1669	Positive	335.221	147.1	6.78	147.1,300.1942,282.1945,148.2207,147.2282,174.2712,264.1712,173.3133,	Kolavic acid	Terpenoid	putative
sp167	Positive	179	123	3.05	123,123.1027,133.1057,137.1489,108.0084,119.1282,76.9834,91.0964,		unknown
sp1670	Positive	337.09	163	9.65	163,95.1147,263.2092,66.9855,79.0603,245.2868,109.0922,161.1617,	Caffeoyl shikimic acid	Polyphenol	putative
sp1673	Positive	339.072	153	10.1	153,121.171,81.0315,265.272,173.0308,247.1424,135.1674,163.2425,	Arabidopyl ketoadipic acid	Others	putative
sp1676	Positive	341.2	207.1	2.12	207.1,	Fructose 1, 6-diphosphate	Saccharides	putatively annotated
sp1677	Positive	342.2	109.1	2.42	109.1,	Methyl di-alpha-L-rhamnoside	Others	putatively annotated
sp168	Positive	179	123	4.3	123,123.0652,133.1156,108.0859,119.0667,76.9821,137.2435,89.0431,		unknown
sp1680	Positive	346	184.1	1.39	184.1,166.1134,148.1749,304.7522,254.0253,327.8082,207.719,310.408,	4-Pyridoxic acid O-hexoside	Vitamine	putatively annotated
sp1683	Positive	349.1	137	6.26	137,285.1257,145.1402,109.1012,137.28,257.0646,331.1778,185.7093,	Inosine 5'-monophosphate	Nucleotide and its derivates	standard
sp1687	Positive	351	147	9.47	147,333.1444,169.2542,81.0167,151.1091,133.0769,111.3326,119.0723,	Spermidine derivative	Phenolamides	putative
sp1688	Positive	351.4	334.2	0.845	334.2,147.1338,333.2425,294.9432,165.1873,277.2786,139.295,235.3124,	Strychnine N-Oxide	Others	putatively annotated
sp1689	Positive	353.086	153	8.38	153,335.1848,279.0545,311.9979,165.2167,251.0569,270.7501,257.0569,	Arabidopyl shikimic acid	Others	putative
sp169	positive	180.1	135.167	1.25	135.1672,152.1463,110.0335,163.1194,157.032,137.2759,161.1002,80.1724,		unknown
sp1690	Positive	353.151	177.2	4.7	177.2,335.1933,111.0831,171.2648,152.7549,165.1747,261.2034,307.3111,	N-Feruloylserotonin	Polyphenol	putative
sp1694	Positive	357.118	177.1	3.18	177.1,269.0334,337.0811,201.1744,147.1769,267.039,72.9524,272.9261,	Ferulic acid O-hexoside	Polyphenol	putative
sp1697	Positive	360.1	145	0.822	145,202.1433,152.1925,234.2313,320.1645,328.0732,318.0657,220.1653,	Sucrose	Saccharides	standard
sp1698	Positive	365.105	203.3	0.826	203.3,234.1312,204.1883,170.1313,347.9879,285.1932,305.9786,292.0637,	Trehalose	Saccharides	putatively annotated
sp1700	Positive	369.119	207.1	4.2	207.1,175.1587,147.0936,119.1,351.1216,360.3346,327.0876,291.0408,	Phellodenol H	Polyphenol	putative
sp1702	Positive	374.108	198.2	1.78	198.2,177.23,270.0151,313.3004,358.0095,268.0777,269.0257,72.9472,	DIMBOA glucoside	Others	putative
sp1704	Positive	377.2	243.1	3.13	243.1,321.2357,343.254,268.9997,281.2668,333.5604,351.2111,267.0379,	Vitamin B2	Vitamine	putative
sp1706	Positive	382.17	220.2	1.9	220.2,162.1864,234.0732,188.148,136.0638,192.1537,148.1156,206.17,	trans-zeatin N-glucoside	Nucleotide and its derivates	putative
sp1708	Positive	384.115	252	1.86	252,134.0993,87.9798,234.9178,367.2369,250.0773,325.2697,192.908,	Succinyladenosine	Nucleotide and its derivates	putative
sp171	Positive	182.1	136.1	1.09	136.1,141.0097,136.1953,90.9986,123.0644,159.0724,119.1157,164.088,	L-(-)-Tyrosine	Amino acids	putatively annotated
sp1711	Positive	387.2	105	6.6	105,161.0699,207.161,258.0661,369.1228,188.5641,274.0583,325.1102,	2-Propenyl (sinigrin)	Others	putatively annotated
sp1713	Positive	387.201	207.2	3.21	207.2,175.0929,387.1726,147.1216,119.16,369.2113,327.04,129.1251,	Roseoside	Others	putatively annotated
sp1716	Positive	398.2	147.1	1.8	147.1,357.768,381.0343,256.976,250.9247,323.2338,346.3321,187.0869,	N-p-Coumaroylputrescine derivative	Phenolamides	putative
sp1717	Positive	400.2	136.1	1.79	136.1,400.1715,268.082,119.17,137.4771,358.8789,383.2636,337.9414,	Adenosine O-ribose	Nucleotide and its derivates	putative
sp1718	Positive	403.1	367.1	4.88	367.1,385.1112,313.0771,282.8949,337.0365,343.0901,325.112,284.0757,	Apigenin C-pentoside	Flavonoid	putatively annotated (by GM)
sp1720	Positive	404.3	193.2	3.29	193.2,284.0862,312.018,330.1325,329.013,385.1785,373.0665,341.2761,	Hedyotoside	Polyphenol	putatively annotated
sp1723	Positive	413.1	162.1	2.34	162.1,395.1158,301.1767,170.9759,283.32,230.3713,187.0789,248.0173,	Threonyl carbamoyl adenosine	Nucleotide and its derivates	putatively annotated
sp1724	Positive	413.141	162.1	2.34	162.1,109.0892,97.1715,395.3143,259.1452,163.2114,284.2583,173.1005,	Threonyl carbamoyl adenosine	Nucleotide and its derivates	putative
sp1726	Positive	414.9	119.2	7.21	119.2,415.2007,117.1385,90.951,132.9582,151.1774,115.1426,160.4113,	Diosgenin	Others	standard
sp173	positive	182.1	124.139	1.65	124.1389,106.0769,77.9923,98.9809,86.1331,150.1509,141.06,136.1012,		unknown
sp1730	Positive	427.1	177.1	1.89	177.1,409.2361,133.1473,293.1726,203.309,283.2173,345.2756,149.2267,	Feruloyl putrescine O-hexoside	Polyamine	putatively annotated (by GGM)
sp1732	Positive	427.2	177.1	1.89	177.1,409.4363,175.2368,165.487,107.2455,391.231,293.2977,211.1257,	Feruloyl putrescine O-hexoside	Polyamine	putatively annotated (by GGM)
sp1733	Positive	427.2	150.2	2.8	150.2,409.3571,293.0942,295.1779,201.1505,133.2621,269.1974,189.2828,	(2S,3R)-2-{[{9-[(2R,3R,4S,5R)-3,4-Dihydroxy-5-(hydroxymethyl)tetrahydro-2-furanyl]-9H-purin-6-yl}(methyl)carbamoyl]amino}-3-hydroxybutanoic acid (non-preferred name)	Nucleotide and its derivates	putatively annotated
sp1737	Positive	433.113	283.1	3.78	283.1,283.0199,415.0862,379.0668,397.1514,367.0669,337.0786,323.0878,	Apigenin 6-C-glucoside	Flavonoid	standard
sp1738	Positive	433.113	271.1	4.03	271.1,283.075,337.086,433.1013,367.0826,379.0594,415.1343,397.1323,	Apigenin 7-O-glucoside	Flavonoid	standard
sp174	Positive	183	83	0.69	83,105.1174,76.9775,80.9338,100.95,127.0871,153.0951,168.1691,	D-Sorbitol	Alcohols and polyols	putatively annotated
sp1740	Positive	435.1	273.1	1.91	273.1,414.8423,352.1423,328.9765,373.0127,236.9098,327.0673,344.8541,	Naringenin 7-O-glucoside	Flavonoid	standard
sp1742	Positive	437.2	420.2	4.34	420.2,331.0704,322.1974,155.1489,209.2961,403.1176,315.0053,329.5224,	Putrescine derivative	Polyamine	putatively annotated
sp1745	Positive	447.1	297.1	3.88	297.1,365.1097,429.1615,149.1395,431.1139,326.9842,386.9342,331.0788,	O-methylapigenin C-hexoside	Flavonoid	putatively annotated (by GM)
sp175	Positive	183.058	123.047	0.68	123.047,140.1574,95.0173,98.9533,155.1362,125.0588,123.1029,100.9469,		unknown
sp1752	Positive	449.1	299.1	3.43	299.1,431.1275,419.1463,147.1135,303.0457,413.1026,285.9599,371.3228,	Luteolin 6-C-glucoside	Flavonoid	standard
sp1754	Positive	449.109	299.2	3.43	299.2,329.0907,298.9724,431.0467,353.0595,413.0713,395.0872,383.062,	Luteolin C-hexoside derivative	Flavonoid	putative
sp1756	Positive	453.3	291.1	2.38	291.1,287.0228,289.0482,288.0136,409.9479,409.0219,433.1439,332.9918,	IAA-Asp-N-Glc	Phytohormone	putatively annotated (by GM)
sp1757	Positive	460.4	119	7.2	119,378.96,375.9308,215.0184,211.049,256.9566,193.0247,442.8698,	Rhodomyrtone	Others	putatively annotated
sp1759	Positive	463.1	313.1	3.88	313.1,445.2737,402.984,331.2778,430.1273,431.2077,417.3543,422.06,	Chrysoeriol C-hexoside	Flavonoid	putatively annotated (by GM)
sp1766	Positive	463.124	313.1	3.88	313.1,343.0273,313.0601,367.0994,445.1433,427.176,397.1682,409.1081,	Chrysoeriol C-hexoside	Flavonoid	putative
sp1768	Positive	465	303	0.846	303,345.0957,447.0841,369.0836,315.0823,429.16,399.111,343.1631,	Tricetin O-hexoside	Flavonoid	putative
sp1769	Positive	465.1	303.1	0.847	303.1,301.0256,302.0505,287.9894,421.0015,251.0461,287.16,304.2674,	Hesperetin 5-O-glucoside	Flavonoid	standard
sp177	Positive	183.058	123.047	3.73	123.047,100.9275,77.1206,141.1709,81.0113,105.0541,165.138,142.1426,		unknown
sp1770	Positive	465.1	303	0.846	303,387.0663,403.0385,257.1904,447.1418,419.0945,151.2785,345.0402,	Quercetin 5-O-hexoside	Flavonoid	putative
sp1772	Positive	465.2	303.1	0.846	303.1,235.104,98.1791,250.1161,447.1237,218.1055,157.152,176.0867,		unknown
sp1774	Positive	474.2	327	2.11	327,327.0999,345.1197,456.14,259.1216,346.6817,284.1172,132.0961,	10-Formyl-THF	Amino acid derivatives	putatively annotated (by GGM)
sp1775	Positive	477.1	297.2	3.98	297.2,459.2347,338.6739,432.1796,162.1388,363.8289,151.2938,417.222,	C-hexosyl-methylchrysoeriol	Flavonoid	putatively annotated
sp1776	Positive	477.139	297.2	3.98	297.2,460.8209,330.9673,315.0773,343.135,373.0596,417.2123,398.9568,	methylChrysoeriol C-hexoside	Flavonoid	putative
sp1777	Positive	479	329.1	3.98	329.1,461.2917,352.9429,371.03,418.9691,462.9984,325.2285,355.1973,	Selgin C-hexoside derivative	Flavonoid	putative
sp1778	Positive	479	317.1	3.1	317.1,437.8436,344.5198,461.0646,377.2618,419.81,418.8166,403.0759,	methylQuercetin O-hexoside	Flavonoid	putative
sp1779	Positive	479.118	317.1	4.2	317.1,316.9199,419.0723,461.1725,435.3972,437.0377,197.1177,272.982,	Selgin 5-O-hexoside	Flavonoid	putative
sp178	Positive	271.053	153.01	5.52	153.01,183.1426,211.106,153.1443,181.1924,169.1643,221.1137,173.1808,	Apigenin	Flavonoid	putatively annotated
sp1780	Positive	479.118	329.1	3.98	329.1,197.0415,298.9231,136.9927,227.0421,256.976,461.067,280.9399,	Selgin C-hexoside	Flavonoid	putative
sp1781	Positive	479.2	317.2	4.2	317.2,479.063,419.0629,461.0675,443.1562,355.1865,296.9713,320.9622,	O-methylQuercetin O-hexoside	Flavonoid	putatively annotated (by GM)
sp1782	Positive	479.3	317.1	4.2	317.1,317.0331,461.1746,137.0957,451.1653,433.5399,419.1463,397.3017,	Selgin O-hexoside	Flavonoid	putatively annotated
sp1783	Positive	480.2	121.1	8.3	121.1,	Luzonoid A	Terpenoid	putatively annotated
sp1785	Positive	492.308	184	7.19	184,432.0367,184.153,474.1843,462.1017,404.14,436.2257,475.8669,	LPC(1-acyl 16:2)	lipids	putative
sp1787	Positive	493.1	331.1	4.28	331.1,493.0763,475.11,137.0543,432.9703,285.3185,369.0362,331.9543,	Tricin 5-O-hexoside	Flavonoid	putatively annotated (by GM)
sp179	Positive	183.058	137	1.12	137,81.0595,95.0178,137.1731,100.99,105.1822,123.1889,127.0604,		unknown
sp1790	Positive	493.134	331.1	4.27	331.1,493.1866,475.104,457.1,426.6504,449.09,355.0532,333.2172,	Tricin 7-O-hexoside	Flavonoid	putatively annotated
sp1791	Positive	494.324	184.2	7.64	184.2,184.1446,476.2748,452.946,434.6943,104.1405,431.0533,420.2129,	LPC(1-acyl 16:1)	lipids	putative
sp1795	Positive	497.1	331	5.68	331,479.1144,225.0657,149.1835,433.1653,451.1917,226.1297,315.0951,	Tricin 4'-O-(syringyl alcohol)ether	Flavonoid	putatively annotated
sp1799	Positive	497.311	335.3	0.879	335.3,331.0262,456.132,474.1762,317.0865,147.087,286.983,335.2387,	Polypodine B	Terpenoid	putative
sp1801	Positive	500.5	236	8.86	236,	N-Feruloylspermidine derivative	Phenolamides	putative
sp1805	Positive	509.131	347.1	0.826	347.1,509.1488,355.0256,491.1902,322.3684,342.9566,389.2299,137.02,	Limocitrin O-hexoside	Flavonoid	putative
sp1807	Positive	511.2	331.1	0.84	331.1,493.18,153.094,495.1987,403.1713,395.3252,502.08,319.6037,	Tricin 4'-O-(syringyl alcohol)ether derivative	Flavonoid	putative
sp1809	Positive	515.1	177.1	5.51	177.1,499.2133,481.1974,177.1786,469.2425,201.2296,355.1467,325.0591,	2'', 6''-O-Diacetyloninin	Flavonoid	putatively annotated
sp181	Positive	183.058	137	3.79	137,137.0469,120.1103,92.0283,123.1432,151.0845,148.1477,90.8771,		unknown
sp1811	Positive	520.3	184.2	7.91	184.2,504.1341,270.2162,353.096,281.0701,282.0185,326.28,502.347,	LPC(1-acyl 18:2)	lipids	putatively annotated
sp1817	Positive	527.1	331	5.74	331,509.2021,490.4649,467.0622,270.1241,177.1606,185.1372,329.0314,	Tricin 4'-O-(β-guaiacylglyceryl) ether	Flavonoid	putatively annotated
sp1819	Positive	531.5	369	3.3	369,517.0728,247.1224,177.1099,313.1085,409.1053,383.0692,327.7564,	Phellodenol H O-hexoside	Polyphenol	putative
sp182	Positive	183.058	137	5.14	137,137.146,165.1682,153.0331,155.1679,119.1055,80.979,141.1837,		unknown
sp1823	Positive	535.2	499.3	3.64	499.3,516.96,247.0076,475.0407,286.9658,177.1655,409.11,437.0288,	di-C,C-pentosyl-apigenin	Flavonoid	putatively annotated (by GM)
sp183	Positive	183.08	69	0.8	69,95.0565,137.2599,81.0101,123.1165,165.2618,109.1747,66.9825,	D-Mannitol	Alcohols and polyols	putatively annotated
sp1830	Positive	557.2	177.1	6.14	177.1,557.139,145.0777,303.0016,345.0538,169.0738,284.9949,117.0126,	Epicatechin O-hexoside derivative	Polyphenol	putatively annotated
sp1837	Positive	579.134	331.1	4.52	331.1,409.0943,247.0362,127.0893,287.0043,271.0771,123.0919,427.0183,	Tricin O-malonylhexoside	Flavonoid	putative
sp1838	Positive	579.2	271.2	4.02	271.2,409.14,123.142,435.1161,453.1112,286.9899,427.084,247.0415,	Apigenin 7-O-rutinoside	Flavonoid	standard
sp1842	Positive	593.1	345.1	12.2	345.1,	3’,4’,5’-Tricetin O-malonylhexoside	Flavonoid	putative
sp1844	Positive	595.166	409.2	3.54	409.2,	di-C,C-hexosyl-apigenin	Flavonoid	putative
sp1849	Positive	595.2	271.1	3.29	271.1,433.0828,313.0716,415.1035,337.0152,367.0695,282.9933,397.0656,		unknown
sp185	Positive	184	125	0.8	125,125.0313,86.0326,99.012,70.9784,166.118,59.9905,109.8071,	O-Phosphocholine	Cholines	standard
sp1850	Positive	595.2	397.1	3.53	397.1,577.1835,559.093,457.1097,439.1438,511.082,541.3008,336.9766,	C-pentosyl-chrysoeriol O-hexoside	Flavonoid	putatively annotated (by GM)
sp1851	Positive	595.3	449.1	3.71	449.1,	Kaempferol 3-O-glucoside-2‘-O-rhamnoside	Flavonoid	standard
sp1854	Positive	607.2	443.1	12.2	443.1,	C-hexosyl-(apigenin 7,4'-dimethyl ether) O-rhamnoside	Flavonoid	putative
sp1855	Positive	609.181	301.1	4.09	301.1,609.0958,463.1573,471.0001,549.2439,207.0729,303.5783,161.28,	Chrysoeriol 7-O-rutinoside	Flavonoid	putative
sp1857	Positive	609.4	301	4.09	301,301.0457,446.6859,591.2012,364.3777,457.5601,302.1643,504.5126,		unknown
sp1858	Positive	611.161	299	3.27	299,	C-hexosyl-luteolin O-hexoside	Flavonoid	putative
sp186	Positive	184	125	7.22	125,86.0417,98.9827,104.1683,71.0286,166.1446,101.9309,60.1094,		unknown
sp1860	Positive	611.2	465.1	4.1	465.1,355.0668,593.4255,415.9621,266.88,281.9986,327.5838,594.82,	C-hexosyl-tricetin O-pentoside	Flavonoid	putative
sp1861	Positive	611.2	303.1	3.7	303.1,355.0709,415.2098,593.4056,282.06,489.895,595.7952,529.0057,	Delphinidin 3-O-rutinoside	unknown
sp1862	Positive	613.2	177.2	0.845	177.2,390.0655,595.0175,450.0713,358.1338,356.1185,357.1448,355.0148,	N', N'', N'''-DiFeruloyl, p-Cinnamoylagamtine	Phenolamides	putative
sp1864	Positive	625	463	7.62	463,565.0741,607.16,593.0472,595.0272,301.1374,616.0883,533.1363,	C-hexosyl-chrysoeriol O-hexoside	Flavonoid	putatively annotated
sp1868	Positive	625.2	177.2	4.8	177.2,477.1122,607.3729,583.848,505.3234,564.9846,132.9662,335.1121,	Luteolin C-feruloylhexoside	Flavonoid	putative
sp1870	Positive	625.2	607.2	0.655	607.2,526.3083,565.1398,536.9105,325.115,456,255.2401,543.3785,	di-C,C-hexosyl-chrysoeriol	Flavonoid	putatively annotated
sp1871	Positive	625.3	317	4.03	317,607.1289,301.0807,331.0624,442.3084,565.3421,151.128,535.0313,	Petunidin 3-O-rutinoside	unknown
sp1872	Positive	627.1	465.2	8.07	465.2,465.12,609.1119,591.1251,594.916,561.3072,177.061,596.9885,	Tricetin 5-O-hexosyl-O-hexoside	Flavonoid	putatively annotated (by GM)
sp1873	Positive	631.3	469	0.81	469,493.0889,301.1508,332.28,431.4699,307.1829,316.0801,474.96,	Selgin O-hexoside derivative	Flavonoid	putatively annotated
sp1875	Positive	639.191	330.6	4.18	330.6,542.916,479.0618,623.04,436.9536,551.0057,393.2653,379.0295,	Tricin 7-O-rutinoside	Flavonoid	putative
sp1878	Positive	655.1	331.1	3.47	331.1,637.2117,595.0735,619.3937,347.1453,557.3599,147.1131,491.1036,	Tricin O-hexosyl-O-hexoside	Flavonoid	putatively annotated (by GM)
sp188	Positive	184	125	7.8	125,86.0973,98.9827,104.1471,71.0507,166.1782,101.9061,111.0039,		unknown
sp1884	Positive	655.2	207.2	3.85	207.2,655.131,347.1493,287.023,493.02,332.1188,637.1281,535.7136,	Luteolin C-sinapoylhexoside	Flavonoid	putative
sp1885	Positive	655.2	331.1	3.48	331.1,655.0753,347.0616,287.0704,213.0918,574.1801,493.0639,611.1384,	Tricin O-hexosyl-O-hexoside	Flavonoid	putatively annotated
sp1888	Positive	655.3	331.1	3.47	331.1,	Tricin O-caffeoyl-4'-O-(coniferyl alcohol) ether	Flavonoid	putatively annotated (by GGM)
sp1889	Positive	664.15	136.05	0.853	136.05,	beta-Nicotinamide adenine dinucleotide	Nucleotide and its derivates	standard (by GGM)
sp1890	Positive	669.1	331	5.06	331,507.1075,651.24,489.0618,315.0764,633.1177,341.6878,355.4181,	Tricin O-glucuronide-O-hexoside	Flavonoid	putatively annotated
sp1891	Positive	669.183	331	5.05	331,689.146,329.0269,491.0329,671.1653,509.1448,527.0457,493.095,	Tricin O-sinapoylpentoside	Flavonoid	putative
sp1894	Positive	689.1	331	4.53	331,689.1598,329.0398,491.1292,509.1281,671.0391,459.1619,527.1929,	Tricin 4'-O-(β-guaiacylglyceryl) ether O-hexoside	Flavonoid	putatively annotated
sp190	Positive	184	125	8.35	125,86.0636,98.9059,103.7779,70.925,104.6188,166.0269,110.9985,		unknown
sp1902	Positive	699.194	331.1	4.84	331.1,331.0908,681.1171,663.2314,207.1989,537.0378,503.3328,651.1522,	Tricin O-sinapoylhexoside	Flavonoid	putative
sp1906	Positive	727.188	419	3.86	419,	C-pentosyl-luteolin O-p-coumaroylhexoside	Flavonoid	putative
sp1907	Positive	727.2	419.1	3.85	419.1,503.0416,415.1012,429.0362,341.0808,355.0844,298.8683,149.1046,	C-pentosyl-apigenin O-rhamnosyl-O-hexoside	Flavonoid	putative
sp1909	Positive	741	595	3.23	595,740.9097,503.101,429.0211,340.995,415.0729,355.1657,680.8795,	Luteolin O-rahmnosyl-O-rutinoside	Flavonoid	putatively annotated
sp191	Positive	184.05	148	1.45	148,166.113,110.9527,120.1152,138.1002,99.0213,124.8,143.2904,	4-Pyridoxic acid	Pyridine derivatives	putatively annotated
sp1912	Positive	771.2	177.2	4	177.2,433.1061,313.0687,177.1294,415.0937,367.1754,337.0759,145.0714,	C-pentosyl-chrysoeriol O-feruloylhexoside	Flavonoid	putatively annotated (by GM)
sp1915	Positive	771.213	177.1	3.99	177.1,433.0891,415.1258,313.0876,177.0419,397.0857,753.0905,160.2,	C-hexosyl-apigenin O-feruloylhexoside	Flavonoid	putatively annotated (by GM)
sp1916	Positive	771.4	625.2	3.31	625.2,496.3509,104.1408,184.1865,552.3282,655.6494,478.2931,654.2787,	Chrysoeriol O-hexosyl-O-rutinoside	Flavonoid	putatively annotated (by GM)
sp1917	Positive	787.208	449.1	4.17	449.1,329.1236,449.0425,430.9818,352.907,383.1575,778.4128,177.1582,	C-hexosyl-luteolin O-feruloylhexoside	Flavonoid	putative
sp1918	Positive	801	301.1	4.46	301.1,357.0035,503.183,222.1309,281.1269,402.12,295.08,342.96,	Chrysoeriol O-feruloylhexosyl-O-hexoside	Flavonoid	putative
sp192	positive	184.1	111.001	0.65	111.0011,166.0712,99.0179,143.0302,124.994,83.0528,161.0454,68.9287,		unknown
sp1921	Positive	801.224	177.1	3.97	177.1,463.1048,445.0923,783.1624,367.0901,145.0407,343.0674,397.2785,	C-hexosyl-chrysoeriol O-feruloylhexoside	Flavonoid	putative
sp193	positive	185.1	60.9228	4.73	60.9228,76.9628,81.1561,78.993,98.0364,74.89,102.9137,144.075,		unknown
sp194	positive	185.1	102.924	0.69	102.9245,112.0455,144.0028,141.0468,154.9758,125.0284,167.0188,70.6018,		unknown
sp195	Positive	189	144	0.77	144,174.2259,79.0264,81.0207,173.1812,159.1614,133.2,91.0255,	H-HomoArg-OH	Amino acid derivatives	putatively annotated
sp196	Positive	189	144	2.18	144,119.1018,118.0946,145.1625,144.1854,146.117,116.1393,143.1309,		unknown
sp197	Positive	152.1	135	1.4	135,110.1423,133.9626,79.8771,81.99,107.2513,83.1202,106.1213,		unknown
sp198	Positive	123.037	79	3.19	79,81.0384,76.9877,107.0013,108.1132,95.0598,67.0527,105.1274,		unknown
sp200	Positive	126.1	109	0.84	109,111.0982,95.0076,96.1361,83.0625,110.1785,81.7414,98.0075,		unknown
sp201	Positive	190.043	144	2.26	144,		unknown
sp202	Positive	190.043	144	2.65	144,151.0626,116.16,149.1015,133.063,114.9464,72.9,89.037,	Kynurenic acid	Organic acids	putatively annotated
sp203	Positive	268.097	136	1.65	136,226.129,198.2322,184.7892,225.2371,227.1449,212.1244,209.1932,	Adenosine	Nucleotide and its derivates	putatively annotated
sp204	Positive	190.1	127	0.82	127,130.1056,148.1564,102.1235,151.0691,149.1021,133.0848,143.9253,	L-Homocitrulline	Amino acids	putatively annotated
sp205	Positive	117.011	71	0.83	71,58.0429,76.8764,77.9783,98.6446,54.9257,57,56.184,		unknown
sp206	Positive	192.06	146	0.82	146,133.129,146.104,174.1684,150.0405,102.9099,160.1425,114.9964,		unknown
sp207	Positive	192.06	146	1.7	146,128.1013,146.1368,84.0023,133.1539,85.0633,156.1623,174.1991,		unknown
sp208	Positive	192.06	146	3.02	146,146.1627,133.1609,128.1145,150.0764,151.06,114.9714,118.0832,	5-Hydroxyindole-3-acetic acid	Indole derivatives	putatively annotated
sp209	Positive	192.06	146	3.32	146,146.1457,133.1191,115.0013,128.1649,103.0092,151.0084,132.088,		unknown
sp211	Positive	195.058	117	3.9	117,108.1671,107.1263,135.1338,112.9844,154.1135,153.0744,149.3712,	3-Hydroxy-4-methoxycinnamic acid	Hydroxycinnamoyl derivatives	putatively annotated
sp212	Positive	153.047	93	3.59	93,135.0614,125.1629,111.8135,65.9063,107.157,110.3416,136.0892,	Vanillin	Benzoic acid derivatives	putatively annotated
sp213	Positive	195.1	145.3	3.07	145.3,136.1219,145.1402,117.0884,89.0407,135.1841,107.1316,108.1247,	Hydroxy-methoxycinnamate	Hydroxycinnamoyl derivatives	putatively annotated
sp214	positive	195.1	81.0474	5.73	81.0474,78.9704,91.0464,135.1941,93.083,159.14,149.1588,107.1633,		unknown
sp215	Positive	160.126	114	0.85	114,142.1082,70.0291,96.0989,78.9758,100.8933,68.9616,85.934,		unknown
sp217	Positive	183.058	137	7.06	137,98.9993,91.0618,119.1289,135.1446,107.1189,94.9664,123.116,		unknown
sp218	positive	200.1	98.9293	0.7	98.9293,159.1046,118.0114,141.051,156.0648,115.065,129.0836,164.5561,		unknown
sp220	Positive	203	83	0.69	83,100.9903,143.1273,162.0676,161.0378,180.1217,102.9011,120.9578,	Spermine	Phenolamides	putatively annotated
sp221	Positive	203	144	4.44	144,115.1288,161.0947,102.9535,175.1532,127.9842,160.08,145.1577,	N-Acetyl tryptamine	Phenolamides	putatively annotated
sp222	positive	203.1	157.194	1.34	157.1937,140.2099,186.1747,102.9933,145.1593,131.125,162.0382,114.8954,		unknown
sp227	Positive	205.1	146	2.18	146,118.1056,188.1632,144.1957,143.2103,132.1743,117.0787,159.2223,	L-Tryptophan	Amino acids	putatively annotated
sp230	Positive	206.1	147.5	2.18	147.5,	Methoxyindoleacetic acid	Indole derivatives	putatively annotated
sp232	Positive	206.1	177.981	2.04	177.9812,		unknown
sp234	positive	206.1	162.147	1.24	162.1474,144.1292,188.1364,132.1273,116.1429,134.233,106.9954,146.1967,		unknown
sp235	Positive	221.1	204	0.81	204,179.1008,99.021,139.1371,131.4231,133.2,162.117,		unknown
sp236	Positive	206.13	76	0.85	76,132.1255,162.1436,145.9462,165.0747,144.1413,106.0862,164.01,		unknown
sp237	Positive	207.1	85	3.03	85,207.1286,119.1726,147.1288,149.1765,123.11,91.0565,189.2645,	6-Hydroxymethylherniarin	Hydroxycinnamoyl derivatives	putatively annotated
sp238	Positive	207.1	85	3.56	85,166.0685,189.1557,119.0737,147.1623,85.0073,123.2533,91.0011,		unknown
sp241	positive	208.1	162.143	2.1	162.1426,144.1687,149.1448,166.1077,107.1514,116.0679,		unknown
sp243	positive	212.1	83.0319	0.69	83.0319,115.0984,101.0342,171.1259,133.1501,124.1069,129.1826,127.1561,		unknown
sp244	Positive	335.1	123	0.81	123,197.0141,220.0437,179.096,137.0486,272.8937,201.3674,290.82,	β-Nicotinamide mononucleotide	Nucleotide and its derivates	putatively annotated
sp247	Positive	219	202	1.05	202,160.1502,115.0224,159.0816,201.1237,187.1781,131.0276,144.1613,	(5-L-Glutamyl)-L-amino acid	Amino acid derivatives	putatively annotated
sp249	Positive	220.2	202.1	1.88	202.1,220.1575,184.192,90.0288,124.111,174.1566,142.1713,69.9555,	D-Pantothenic acid	Vitamine	standard
sp250	Positive	221.1	204	1.15	204,137.0096,197.0715,119.1075,135.0464,179.1013,136.0995,139.1242,		unknown
sp251	Positive	221.1	204	1.34	204,202.2525,162.2681,119.1824,105.0714,106.1448,161.1568,146.0238,		unknown
sp252	Positive	124.03	106	1.06	106,108.1485,66.01,107.0529,109.1307,79.9688,122.4995,64.8667,	2-Picolinic acid	Organic acids	putatively annotated
sp253	Positive	222	144	0.83	144,91.0644,107.0978,119.208,204.1912,178.2019,118.1684,98.9287,	N-Acetyl-D-glucosamine	Carbohydrates	putatively annotated
sp254	Positive	223	134	0.79	134,211.0841,191.1237,207.161,134.0462,193.0729,88.0332,179.1661,	L-Cystathionine	Amino acid derivatives	putatively annotated
sp257	Positive	224.1	136	2.31	136,211.0747,223.0966,207.1108,191.0961,164.7703,193.07,195.1218,	N-Acetyl-L-tyrosine	Amino acid derivatives	putatively annotated
sp261	Positive	235.1	118.3	0.83	118.3,84.1221,217.2087,172.1937,132.08,119.28,153.5667,57.8894,	Lysine butyrate	Amino acid derivatives	putatively annotated
sp262	Positive	235.1	147.2	2.47	147.2,118.1303,119.1017,115.0375,189.1934,91.1082,192.9325,175.1464,	N'-p-Coumaroyl putrescine	Phenolamides	putatively annotated
sp264	positive	236.1	136.139	1.31	136.1387,119.0951,105.9852,194.9734,177.0793,149.0351,154.1325,218.0938,		unknown
sp265	positive	236.1	148.112	2.47	148.1124,120.0561,131.1365,219.1871,92.04,113.0765,195.0104,		unknown
sp267	Positive	250	134	1.13	134,158.4392,235.1891,127.1076,122.7097,193.1635,210.2073,204.0509,	Pyridoxine 5'-phosphate	Vitamine	putatively annotated
sp272	positive	239.1	198.043	0.71	198.0433,137.0907,133.6573,179.2358,221.0176,215.0806,151.0111,		unknown
sp273	positive	240.1	124.156	3.25	124.156,180.1791,156.7723,77.886,199.0568,231.0913,141.0743,152.07,		unknown
sp274	Positive	241	152	0.81	152,185.1291,199.0912,159.1819,226.0961,135.4501,213.1846,131.2345,	L-(-)-Cystine	Amino acids	putatively annotated
sp275	Positive	241	152	1.06	152,149.1584,119.034,136.9691,211.121,147.1418,114.9368,102.8993,		unknown
sp276	positive	241.1	98.9886	0.7	98.9886,127.9926,211.1429,157.2937,131.4799,223.1764,		unknown
sp278	Positive	244.086	112	0.86	112,226.1292,198.2463,196.1755,179.973,96.984,	Cytidine	Nucleotide and its derivates	putatively annotated
sp279	Positive	245.1	113	1.1	113,69.973,163.0218,116.1972,203.0028,144.0943,95.9345,182.7937,	Uridine	Nucleotide and its derivates	putatively annotated
sp282	positive	247.1	98.9289	0.83	98.9289,146.1657,86.0414,114.0625,186.2604,142.17,88.1617,157.1067,		unknown
sp285	Positive	285.1	153	8.31	153,267.224,149.1271,123.2135,175.2914,147.2924,225.1778,121.1791,		unknown
sp286	positive	252.1	91.1867	2.94	91.1867,170.0933,134.056,187.8905,116.0577,74.028,87.96,228.9348,		unknown
sp290	Positive	253.1	137	1.73	137,170.0366,127.9775,119.16,188.1037,110.1888,234.054,211.1243,	2'-Deoxyinosine	Nucleotide and its derivates	putatively annotated
sp291	positive	255.1	114.001	1.17	114.0007,136.9867,110.9213,159.2862,72.96,237.0878,145.1177,156.9943,		unknown
sp292	positive	255.1	135.109	2.16	135.1088,153.1903,107.1392,179.2264,237.2113,125.0739,76.9642,130.9558,		unknown
sp294	positive	255.1	237.006	0.71	237.0055,214.1373,126.2718,173.12,136.9377,170.9945,123.5116,196.4812,		unknown
sp296	Positive	256.2	124.1	0.83	124.1,115.0273,256.0688,215.0134,174.0447,133.0222,138.3769,167.0875,	Nicotinate ribonucleoside	Nucleotide and its derivates	putatively annotated
sp301	Positive	113.027	70	1.15	70,69,79.1728,86.136,96.9564,71.36,95.7728,76.9964,	Uracil	Nucleotide and its derivates	putatively annotated
sp303	positive	261.1	171.179	3.86	171.1785,107.1587,243.1187,143.1422,199.2,155.1722,115.1544,157.19,		unknown
sp305	positive	261.1	201.135	0.7	201.1352,219.7257,175.169,216.2652,113.113,146.1088,236.982,243.1287,		unknown
sp309	positive	263.1	118.128	0.87	118.1276,146.1828,263.0783,245.1678,217.2362,199.2197,112.7026,128.0871,		unknown
sp314	positive	264.1	109.226	9.7	109.2259,145.7592,94.9694,119.4279,149.7637,246.2652,191.9869,91.0122,		unknown
sp316	Positive	265.1	122.1	0.82	122.1,176.9423,219.21,223.1491,209.1096,247.1029,	Thiamine	Vitamine	standard
sp318	Positive	217.1	158	0.86	158,105.1415,133.1856,119.2252,175.2846,91.0462,107.2698,173.2097,	Nα-Acetyl-L-arginine	Amino acid derivatives	putatively annotated
sp319	Positive	265.1	177.5	2.38	177.5,145.1326,117.1306,88.9881,149.1143,71.982,121.0714,219.06,	N'-Feruloyl putrescine	Phenolamides	putatively annotated
sp322	positive	266.1	104.064	0.78	104.0639,87.0369,127.0629,84.912,99.1307,97.0727,145.1802,73.2899,		unknown
sp323	positive	266.1	123.14	0.68	123.1397,248.0909,144.0572,220.2195,224.0078,81.0489,208.9824,161.9309,		unknown
sp328	positive	266.1	178.129	2.74	178.1292,146.1595,117.06,249.1818,149.6419,89.1044,223.95,135.0728,		unknown
sp329	positive	267.1	161.183	3.78	161.183,225.1163,107.0762,209.0861,169.2049,205.3512,249.1155,193.0897,		unknown
sp330	Positive	268	121	8.1	121,240.1539,98.9328,120.594,125.0996,163.021,148.7107,104.165,		unknown
sp331	Positive	133.054	74	0.8	74,133.0514,70.0029,87.0253,116.0914,72.8622,88.0703,97.6938,	L-Asparagine	Amino acids	putatively annotated
sp332	Positive	284.092	152	1.35	152,135.077,110.1408,136.1012,269.9093,182.7494,108.9794,154.08,	Guanosine	Nucleotide and its derivates	putatively annotated
sp334	positive	268.1	98.9637	8.14	98.9637,240.2025,250.3197,212.2759,244.1462,194.5411,185.3367,105.77,		unknown
sp335	Positive	152	135	1.53	135,110.1653,133.8829,107.4665,109.1956,121.025,105.9721,111.1768,		unknown
sp336	Positive	271	137	7.78	137,215.2191,131.1638,145.1854,159.1609,107.2122,253.2419,117.3185,		unknown
sp337	Positive	273.069	153	5.42	153,255.1584,181.1987,213.215,153.1293,157.1749,131.0305,143.1975,	Naringenin	Flavonoid	putatively annotated
sp338	positive	271.1	109.229	7.82	109.2294,155.1502,		unknown
sp339	positive	272.1	98.941	12.27	98.941,230.0494,189.1506,255.1033,213.1664,163.1416,136.2389,150.1642,		unknown
sp342	Positive	301.063	286.01	5.64	286.01,286.0142,258.0934,283.1939,161.0584,269.3164,175.2243,135.0594,	Chrysoeriol	Flavonoid	putatively annotated
sp343	Positive	273.07	153	5.42	153,99.0048,153.1229,213.1515,171.0239,181.101,255.1167,147.1906,	Naringenin chalcone	Flavonoid	putatively annotated
sp347	Positive	277	259	0.81	259,241.0129,98.9706,235.064,217.0797,157.0855,83.0009,143.4314,	L-Saccharopine	Amino acid derivatives	putatively annotated
sp348	Positive	277.1	114.7	0.84	114.7,199.1725,159.2825,259.3271,130.7893,241.1774,209.1167,123.0311,		unknown
sp351	positive	277.1	98.9868	12.27	98.9868,277.0727,235.0031,218.1827,159.2903,191.1218,179.0496,175,		unknown
sp353	Positive	277.2	93	5.68	93,107.091,135.2251,91.0264,259.1919,93.1294,95.1385,149.1819,		unknown
sp354	Positive	277.2	93	7.85	93,93.0918,121.1801,91.0138,78.9836,149.1385,107.1625,133.132,	Octadecadien-6-ynoic acid	lipids	putatively annotated
sp357	positive	278.1	186.248	4.69	186.2484,230.2996,88.0025,260.204,216.4174,132.1243,198.2257,162.2336,		unknown
sp358	positive	279.1	95.0515	8.26	95.0515,81.0306,66.9898,109.1967,78.9754,173.2594,149.2212,123.2315,		unknown
sp359	positive	279.1	120.147	3.39	120.1467,149.095,201.1554,219.0992,98.9084,173.05,191.1091,261.0658,		unknown
sp360	positive	279.1	136.157	1.91	136.1575,279.0731,116.1508,149.0844,119.133,69.9989,201.1027,91.0652,		unknown
sp361	Positive	279.3	95.1	8.22	95.1,149.0905,201.1128,219.1006,173.1426,167.2278,261.194,121.1682,		unknown
sp362	Positive	279.3	95.1	8.4	95.1,149.0982,201.1292,173.0936,219.1247,165.2567,137.2663,167.2154,		unknown
sp363	Positive	279.3	95.1	8.92	95.1,95.0494,81.0222,66.959,109.0246,79.0213,135.1752,123.1255,	Punicic acid	lipids	putatively annotated
sp365	Positive	280	177	3.14	177,177.1313,178.205,221.1174,117.0747,99.0144,118.1255,100.0293,		unknown
sp368	positive	280.1	81.0136	8.26	81.0136,95.033,67.0065,78.9699,124.2647,109.2156,174.2365,93.0056,		unknown
sp370	positive	280.1	120.138	1.66	120.1381,280.0308,176.0993,234.04,149.1292,220.1046,251.0172,238.0441,		unknown
sp373	Positive	161.2	90	0.81	90,145.1826,159.2157,131.1491,120.3957,118.2133,128.1357,91.4413,	D-Alanyl-D-Alanine	Amino acid derivatives	putatively annotated
sp374	Positive	281.3	166	2.23	166,265.0299,120.1696,266.9891,249.0123,211.0026,263.0867,221.04,	Asp-phe	Amino acid derivatives	putatively annotated
sp375	Positive	237.1	192	1.77	192,237.0145,177.0886,135.1,146.0669,117.1122,174.1478,195.1946,	N'-Formylkynurenine	Amino acid derivatives	putatively annotated
sp376	Positive	140	94	1.09	94,71.9054,94.072,56.9147,66.1,74.0599,112.3891,96.2933,		unknown
sp379	Positive	385	250	1.26	250,105.0057,342.8841,284.17,230.175,128.3438,172.1042,224.0839,	S-(5'-Adenosy)-L-homocysteine	Amino acid derivatives	putatively annotated
sp381	Positive	286	124	1.94	124,250.1259,106.0409,268.0829,80.0196,77.8764,244.9601,	Nicotinic acid-hexoside	Nucleotide and its derivates	putatively annotated
sp382	Positive	287.048	241	4.29	241,161.2112,269.1656,185.13,147.24,173.2584,203.2583,273.12,		unknown
sp384	Positive	517.3	499	3.65	499,499.1001,337.1611,481.0863,469.1008,451.1677,409.0708,433.0668,		unknown
sp386	Positive	289.063	153	3.75	153,135.1787,163.1079,229.1152,197.1396,271.086,139.0669,257.112,		unknown
sp387	Positive	289.063	153	4.23	153,163.1411,271.1317,145.1376,159.1247,243.1935,135.0619,117.1689,		unknown
sp388	Positive	289.063	153	4.87	153,184.161,121.0789,105.1103,177.2279,131.1643,133.2536,163.2032,	Eriodictyol	Flavonoid	putatively annotated
sp390	Positive	303	229	3.87	229,257.1002,153.1229,137.2992,285.1148,165.14,267.1224,201.1584,		unknown
sp391	Positive	147.069	84	0.74	84,130.113,66.9556,146.958,65.0183,87.0638,115.0734,61.0531,	L-Glutamine	Amino acids	putatively annotated
sp394	positive	292.1	140.142	2.84	140.142,124.1293,148.1511,166.2019,162.0984,116.1169,208.0709,118.8975,		unknown
sp395	positive	293.1	80.9989	9.41	80.9989,95.0864,131.0791,67.008,151.1771,109.1561,92.9969,133.3262,		unknown
sp397	positive	293.1	136.149	2.2	136.1495,293.0923,119.1178,165.0766,247.1348,83.9829,123.144,147.0918,		unknown
sp398	positive	293.1	293.073	4.28	293.0729,277.08,248.1114,205.3493,237.0962,220.1485,119.16,107.1956,		unknown
sp400	positive	295.1	120.119	2.41	120.1186,150.1266,166.2056,295.0627,278.1447,186.1905,136.1844,103.0673,		unknown
sp401	positive	295.1	120.155	1.73	120.1553,295.0093,211.0699,234.9073,252.9334,277.0303,171.0273,148.0544,		unknown
sp402	positive	295.1	120.155	2.21	120.1553,		unknown
sp404	positive	295.1	136.133	2.63	136.1335,119.1392,91.1049,276.9893,234.9932,133.0691,151.0897,249.1409,		unknown
sp405	Positive	295.2	179.2	8.44	179.2,277.1895,295.1425,135.1744,121.1886,105.1036,151.1735,161.2355,	9-Hydroxy-(10E,12Z,15Z)-octadecatrienoic acid	lipids	putatively annotated
sp408	Positive	298	163	2.64	163,256.9597,98.934,96.9433,281.9647,145.1864,163.2043,74.9856,	5'-Deoxy-5'-(methylthio)adenosine	Nucleotide and its derivates	putatively annotated
sp409	Positive	298.1	166.3	0.89	166.3,262.2457,244.2587,81.0028,109.14,135.1777,107.0469,257.0585,		unknown
sp410	Positive	298.1	166.3	1.06	166.3,262.2476,148.1469,147.1519,257.0309,244.1988,164.1976,81.0288,	N2-methylguanosine	Nucleotide and its derivates	putatively annotated
sp411	Positive	298.1	166.3	1.7	166.3,257.0262,282.0437,140.1133,253.7151,184.1109,148.6613,99.0247,		unknown
sp412	Positive	298.1	166.3	8.85	166.3,		unknown
sp413	positive	300.1	124.116	2.27	124.1157,152.1678,106.068,281.9791,108.1341,129.8393,84.9675,265.9099,		unknown
sp416	Positive	301.1	286	4.03	286,286.0417,258.0779,122.7383,133.3742,167.52,153.3781,229.0513,	Kaempferide	Flavonoid	putatively annotated
sp417	positive	302.1	159.234	3.15	159.2343,224.9633,263.9936,132.1388,170.1225,241.0227,206.9833,285.106,		unknown
sp421	Positive	303	229	3.7	229,257.0558,285.0563,153.0473,137.1231,173.2005,201.0269,242.6595,		unknown
sp422	Positive	303	229	7.1	229,285.1638,135.0508,267.2215,163.1757,243.1855,215.2449,187.1958,	Tricetin	Flavonoid	putatively annotated
sp423	Positive	303.079	153	5.51	153,177.122,145.0915,117.0143,179.175,137.1486,285.0731,219.1717,	Hesperetin	Flavonoid	putatively annotated
sp431	Positive	305.058	123	3.96	123,287.1345,165.1225,179.115,121.168,163.2413,189.2842,203.1604,	Dihydroquercetin (Taxifolin)	Flavonoid	putatively annotated
sp432	positive	305.1	137.099	3	137.0986,305.0282,287.1059,202.9903,179.1674,151.177,245.3125,177.08,		unknown
sp434	positive	305.1	139.143	3.44	139.143,		unknown
sp435	positive	305.1	153.098	4	153.0984,259.1312,149.1147,231.1011,123.1723,305.0177,287.0374,195.1152,		unknown
sp438	positive	305.1	287.23	4.33	287.23,84.11,133.1914,130.1059,186.8627,155.2,301.1463,147.1127,		unknown
sp440	Positive	307.2	177.2	3.15	177.2,307.0082,231.0749,130.1209,247.0974,248.0431,235.0828,201.0939,		unknown
sp443	positive	309.1	147.135	3.04	147.1349,119.1461,291.0306,308.9953,177.1013,91.1477,145.0973,80.9946,		unknown
sp444	Positive	310	251	3.18	251,147.1392,175.1897,208.0583,178.0427,152.1289,245.9294,269.016,	Sinapoylcholine	Cholines	standard
sp445	Positive	312	180	2.03	180,109.8973,162.5423,270.95,251.9978,207.9504,223.2031,283.9196,	2-(dimethylamino)guanosine	Nucleotide and its derivates	putatively annotated
sp446	positive	312.1	223.113	1.68	223.1127,312.0082,180.2424,270.9853,136.2568,162.0483,220.0513,134.1128,		unknown
sp447	positive	313.1	225.056	0.69	225.0556,243.034,313.0536,201.1259,271.9525,140.8725,183.0771,261.0552,		unknown
sp448	Positive	314	177	4.78	177,151.09,177.0678,272.9707,296.1292,239.08,145.0715,272.0555,	N-Feruloyl tyramine	Phenolamides	putatively annotated
sp450	Positive	315.079	300	6.84	300,209.27,237.1647,279.12,199.2086,255.1289,183.2507,297.1714,	Kumatakenin	Flavonoid	putatively annotated
sp451	positive	315.1	271.193	7.82	271.1929,199.1484,297.1829,185.202,241.14,269.1707,143.1859,161.2211,		unknown
sp452	positive	316.1	136.151	1.57	136.1513,97.12,306.9822,279.1502,297.9862,164.17,273.9239,292.9713,		unknown
sp456	Positive	317.1	137.1	0.75	137.1,219.0034,234.9372,138.6,167.04,		unknown
sp458	Positive	317.2	299	7.45	299,106.1378,299.1684,271.1865,253.1995,256.2637,107.1973,69.9692,	Caffeyl alcohol	Hydroxycinnamoyl derivatives	putatively annotated
sp459	Positive	317.2	299	8.15	299,106.1325,299.1822,133.1631,147.14,289.0654,256.3206,149.9419,		unknown
sp470	Positive	319.1	283.7	6.7	283.7,301.1829,189.1627,265.2073,135.1624,187.2764,147.151,133.2124,	Phytocassane C	Terpenoid	putatively annotated
sp477	Positive	324	112	0.81	112,130.0869,68.9693,127.1196,97.0208,83.977,325.0274,147.1243,	Cytidine 5'-monophosphate (Cytidylic acid)	Nucleotide and its derivates	putatively annotated
sp478	positive	326.1	283.974	0.68	283.9738,325.999,243.0335,302.9918,208.9767,225.1156,258.1602,261.0185,		unknown
sp479	Positive	330	136	0.87	136,312.0646,270.6224,251.8715,288.899,267.1276,227.131,99.1061,		unknown
sp480	Positive	330	136	1.19	136,171.031,212.0862,208.8672,188.025,169.9823,268.1741,312.049,		unknown
sp482	Positive	330	136	1.74	136,312.01,294.135,240.9383,242.0063,216.486,223.035,119.9655,	Cyclic AMP	Nucleotide and its derivates	putatively annotated
sp484	positive	330.1	284.231	3	284.2313,239.1192,128.2876,199.1069,84.06,311.9952,168.5877,136.1379,		unknown
sp486	Positive	331.1	315	4.01	315,270.0689,313.2182,285.084,299.0985,287.1125,303.0379,119.1451,		unknown
sp487	Positive	331.1	315	5.58	315,316.1137,270.097,313.131,281.1223,285.119,147.1385,257.1778,	Tricin	Flavonoid	standard
sp490	Positive	332.1	314.3	0.86	314.3,108.1311,152.1104,134.1205,170.1649,136.1908,124.0701,106.2288,		unknown
sp491	Positive	332.1	314.3	1.06	314.3,270.2031,323.12,177.2847,286.058,188.3532,178.1723,291.1881,	Pyridoxine O-glucoside	Vitamine	putatively annotated
sp496	Positive	333.052	137.05	0.74	137.05,234.9672,250.8667,138.441,157.3091,144.9356,197.1074,142.9632,	2'-Deoxyinosine-5'-monophosphate	Nucleotide and its derivates	putatively annotated
sp497	positive	333.1	289.065	4.33	289.0652,316.1424,298.9034,227.2583,304.1229,189.0957,161.7975,147.1264,		unknown
sp502	Positive	129.1	84	1.95	84,127.1038,111.046,77.0714,69.0536,86.0724,117.0583,102.1762,		unknown
sp503	positive	335.1	125.059	4.9	125.0592,181.1586,153.1315,317.2383,299.1612,114.0698,99.1634,239.1835,		unknown
sp505	positive	336.1	125.061	4.9	125.0615,181.1648,153.1438,146.1048,318.2149,162.6077,300.096,98.9585,		unknown
sp511	Positive	337.2	207.3	9.55	207.3,263.2562,95.12,109.1507,245.225,79.0849,67.0046,121.0356,		unknown
sp514	Positive	339.1	145.4	3.16	145.4,247.2588,95.0658,121.1741,265.2872,81.0041,78.9864,109.0665,	O-Feruloyl 2-hydroxylcoumarin	Coumarins	putatively annotated
sp515	Positive	339.1	177.2	3.16	177.2,338.9978,145.1313,257.0219,321.0175,283.0547,117.001,98.9308,		unknown
sp516	Positive	339.1	177.2	3.78	177.2,321.0563,145.0808,137.0704,116.9913,307.006,256.948,311.233,	O-Feruloyl 4-hydroxylcoumarin	Coumarins	putatively annotated
sp517	positive	339.1	177.134	3.2	177.1337,114.0668,145.0909,227.16,256.9717,321.0524,283.1084,117.0733,		unknown
sp520	Positive	343.1	240.7	6.36	240.7,283.0655,125.2583,326.6688,245.1459,255.0983,163.2913,307.44,	Cocamidopropyl betaine	Others	putatively annotated
sp522	positive	344.1	344.098	0.88	344.0976,326.0548,197.1443,269.0494,225.1058,162.2286,241.184,280.1263,		unknown
sp525	Positive	345.2	177.2	6.13	177.2,145.0848,345.1192,313.1008,117.055,169.1875,127.0655,285.0915,	Ayanin	Flavonoid	putatively annotated
sp526	Positive	346	184.1	1.45	184.1,258.0407,328.0858,184.191,309.9652,127.032,198.144,220.2002,	4-Pyridoxic acid O-hexoside	Vitamine	putatively annotated
sp535	positive	347.1	330.119	1.96	330.1193,318.0667,302.121,276.1585,315.0893,287.0791,146.0312,289.2414,		unknown
sp537	Positive	348.1	136.1	0.86	136.1,348.08,306.9063,330.1067,331.1001,209.2956,213.9789,129.1014,	Adenosine 3'-monophosphate	Nucleotide and its derivates	putatively annotated
sp540	positive	348.1	172.262	7.67	172.2622,177.0964,330.089,136.2218,237.9313,215.1496,72.8255,320.3783,		unknown
sp541	Positive	348.2	136	1.05	136,347.9977,329.9789,148.0583,197.0491,287.8547,298.3269,126.0522,	Adenosine 5'-monophosphate	Nucleotide and its derivates	standard
sp542	Positive	349.1	137.3	1.06	137.3,306.8065,288.9396,307.9154,232.035,136.1684,204.9544,137.176,		unknown
sp543	positive	349.1	303.243	6.3	303.2431,331.1836,213.6142,211.1113,233.0736,137.1138,285.0585,267.15,		unknown
sp544	positive	350.1	295.155	10.13	295.1546,131.0907,231.222,223.1508,112.1616,313.2695,81.0522,95.2446,		unknown
sp546	Positive	351.4	334.3	0.88	334.3,147.1192,333.2335,81.099,310.1927,151.1723,119.0624,91.1257,		unknown
sp547	Positive	351.4	334.3	1.06	334.3,		unknown
sp551	Positive	353.1	177.1	4.68	177.1,145.0941,335.1755,117.0695,317.148,149.2213,288.9692,191.1602,	N-Feruloyl serotonin	Tryptamine derivatives	putatively annotated
sp552	positive	353.1	177.119	4.73	177.1185,145.141,335.2112,117.05,163.52,317.2376,160.4227,299.1704,		unknown
sp554	positive	353.1	261.222	9.18	261.222,243.2602,335.2708,81.0097,173.2549,93.1131,131.1852,135.2211,		unknown
sp556	Positive	353.3	261.1	7.25	261.1,261.2007,243.2473,135.2178,335.2224,93.104,121.1384,149.193,	MAG (18:3) isomer5	lipids	putatively annotated
sp557	Positive	353.3	261.1	7.7	261.1,261.2032,279.1529,121.1509,147.192,243.2084,165.1545,135.1469,		unknown
sp558	Positive	353.3	261.1	9.03	261.1,261.2203,279.1869,317.1667,243.24,336.2784,147.1821,335.1564,		unknown
sp559	Positive	353.3	261.1	9.14	261.1,261.2294,279.1719,183.2255,135.1879,243.2661,95.1248,81.1019,		unknown
sp560	Positive	353.3	261.4	8.39	261.4,261.2069,147.1301,335.1751,243.1961,131.149,173.2615,121.0737,	MAG (18:3) isomer3	lipids	putatively annotated
sp567	Positive	357.2	265.4	8.38	265.4,339.1753,265.2427,121.1222,269.065,324.962,125.1562,247.2115,	MAG (18:1) isomer2	lipids	putatively annotated
sp576	positive	362.1	184.153	2.52	184.1528,		unknown
sp577	positive	362.1	184.153	2.87	184.1528,104.1337,179.1818,344.0787,86.1038,125.1248,149.1453,123.1242,		unknown
sp581	positive	363.1	201.072	2.46	201.072,317.1131,345.1255,98.9882,159.1173,243.108,225.1227,155.1732,		unknown
sp584	Positive	364.1	152.1	0.86	152.1,151.1026,346.1127,150.063,318.078,137.2638,149.1422,178.125,		unknown
sp588	positive	365.1	347.277	8.45	347.2771,		unknown
sp590	positive	366.1	204.165	0.86	204.1653,138.1861,186.139,312.2396,84.225,126.1154,348.18,282.1068,		unknown
sp591	positive	366.1	220.163	1.13	220.1635,202.127,188.184,117.1116,130.1316,237.1278,291.0641,347.9789,		unknown
sp593	Positive	366.2	204.1	0.84	204.1,322.2554,204.1715,344.1993,203.1242,138.1818,186.201,185.1246,	iP7G	Nucleotide and its derivates	putatively annotated
sp595	positive	368.1	206.092	1.84	206.0921,188.033,162.1595,178.1614,368.0982,164.2298,132.2418,248.1646,		unknown
sp597	Positive	369.1	177.1	2.75	177.1,369.0737,147.127,119.1524,177.1457,175.1824,351.0206,327.06,	3-O-Feruloyl quinic acid	Quinate and its derivatives	putatively annotated
sp599	positive	369.1	327.089	0.68	327.0891,351.0037,187.0061,139.1956,161.8335,306.9246,284.8839,165.15,		unknown
sp600	Positive	369.119	207.1	2.88	207.1,175.0831,369.0458,147.1097,119.1368,327.1313,351.0881,308.6704,		unknown
sp601	Positive	369.119	207.1	3.19	207.1,175.2103,327.0658,147.1348,308.9004,351.0609,119.1264,211.1432,		unknown
sp602	Positive	369.119	207.1	4.19	207.1,327.0812,351.1313,175.1125,147.1508,308.8057,264.6281,270.4609,		unknown
sp603	positive	370.1	208.143	2.92	208.1427,176.1738,370.0464,147.1807,120.1468,191.2329,159.2509,130.1523,		unknown
sp605	positive	370.1	334.161	5.75	334.161,352.2298,252.1296,212.099,208.1192,270.1227,196.1314,328.117,		unknown
sp607	positive	371.1	136.138	1.07	136.1383,355.0876,268.9718,218.1382,73.0251,285.0182,97.068,281.0547,		unknown
sp608	positive	372.1	136.113	3.96	136.1126,356.0308,269.9273,72.9887,286.02,354.0299,281.9934,263.1642,		unknown
sp609	Positive	373.121	343	7.03	343,355.16,268.9252,357.1129,358.0585,147.0876,330.7872,341.249,	Tangeretin	Flavonoid	putatively annotated
sp610	Positive	374.1	198.2	1.54	198.2,124.0837,180.1403,106.1002,141.1222,216.0724,355.9934,94.9007,		unknown
sp611	Positive	374.1	198.2	1.8	198.2,374.062,216.1409,198.1833,124.0683,356.1,106.0795,358.0259,		unknown
sp613	positive	374.1	319.201	9.7	319.2007,131.0571,197.2025,337.2467,81.0729,109.2099,95.1504,263.2827,		unknown
sp616	Positive	377	243	3.12	243,359.1319,172.1665,216.1705,198.187,201.1742,341.104,151.0901,	Riboflavin	Vitamine	putatively annotated
sp618	positive	378.1	337.208	9.41	337.2081,133.1944,147.2217,160.222,355.1688,360.1852,214.219,183.9972,		unknown
sp623	positive	382.1	250.009	1.68	250.0089,322.0435,208.08,221.232,192.0447,364.1166,136.0409,298.0862,		unknown
sp625	Positive	384.115	252	1.92	252,384.1068,162.0555,136.0629,188.1794,234.1399,342.7451,192.18,	Succinyladenosine	Nucleotide and its derivates	putatively annotated
sp626	Positive	206.13	76	1.56	76,133.01,188.1313,146.1533,162.1991,145.1234,191.0735,165.0097,		unknown
sp627	positive	385.1	176.124	1.65	176.124,367.0471,339.0921,238.1946,149.0767,120.2113,165.1169,321.0648,		unknown
sp628	Positive	387.1	331.1	7.11	331.1,175.092,137.0649,369.0938,151.1193,351.1492,337.0787,269.0487,	Cholesterol	Others	putatively annotated
sp629	positive	387.1	105.111	6.64	105.1107,151.129,369.3332,79.0547,345.9236,327.2569,133.1662,103.0007,		unknown
sp632	positive	392.1	113.067	6.45	113.0665,69.0097,374.1768,356.3527,351.0678,157.2035,174.2113,115.31,		unknown
sp633	positive	392.1	120.205	3	120.2049,231.1804,392.04,134.1357,186.1655,374.0801,250.0532,116.1352,		unknown
sp649	positive	399.1	137.026	0.77	137.026,219.0109,235.059,300.8815,317.0027,203.0056,174.7417,324.96,		unknown
sp654	positive	400.1	268.104	1.65	268.1039,136.1881,178.1635,232.2452,159.9727,302.1006,382.1008,250.1037,		unknown
sp658	Positive	403.1	367	4.23	367,313.0524,385.0672,337.0699,343.0615,355.231,339.1146,297.1057,	Apigenin 8-C-pentoside	Flavonoid	putatively annotated
sp659	Positive	403.1	367.1	3.98	367.1,385.08,313.0809,284.0663,330.1395,329.0525,343.1262,283.0246,	Apigenin 6-C-pentoside	Flavonoid	putatively annotated
sp661	positive	403.1	124.105	2.63	124.1048,188.1564,106.1558,152.1166,394.1516,134.0632,250.0313,170.1329,		unknown
sp662	Positive	403.132	373	6.6	373,284.0647,330.0875,311.9616,329.0504,373.0773,256.1027,255.0417,	Nobiletin	Flavonoid	putatively annotated
sp663	positive	404.1	91.0214	3.32	91.0214,193.1564,403.9723,141.2078,344.92,361.9829,137.0492,155.7158,		unknown
sp666	Positive	405.1	331.2	5.15	331.2,316.2157,315.15,270.1778,387.2034,286.8982,224.9783,329.16,	Tricin O-glycerol	Flavonoid	putatively annotated
sp669	positive	410.1	124.075	2.49	124.0754,410.018,268.0807,329.131,217.034,390.2057,106.1268,350.4518,		unknown
sp672	Positive	412.3	184	5.65	184,184.1877,394.1925,265.7829,323.1245,366.1399,324.6166,124.6542,	LysoPC 10:0	lipids	putatively annotated
sp684	positive	425.1	193.243	2.1	193.2432,340.1433,407.0249,219.1495,287.1018,379.1082,383.976,121.2181,		unknown
sp685	positive	426.1	408.065	0.68	408.0651,327.817,385.1268,309.7243,284.7992,366.9819,322.8001,305.2864,		unknown
sp686	Positive	426.3	285.2	7.17	285.2,285.2272,408.244,328.292,254.2562,348.1708,342.1071,385.0552,		unknown
sp687	Positive	426.3	285.2	7.34	285.2,426.1406,254.2677,408.359,108.9393,352.0228,366.0269,417.72,	LysoPE 14:0	lipids	putatively annotated
sp688	positive	427.1	177.108	1.92	177.1084,265.1505,145.068,117.0623,248.1264,307.1816,328.7055,410.9206,		unknown
sp693	Positive	433	271	4.02	271,416.9123,415.056,243.06,391.4061,344.5165,312.9085,326.88,		unknown
sp694	Positive	433.1	271	0.8	271,397.0732,271.1193,283.0433,336.8864,401.1044,345.0182,308.8333,		unknown
sp696	Positive	433.1	271.1	4.01	271.1,283.0715,313.076,337.0785,397.0711,415.084,367.1187,379.1214,	Apigenin 7-C-glucoside (Cosmosiin)	Flavonoid	standard
sp697	Positive	433.1	271.1	4.19	271.1,283.0569,313.0561,337.0778,415.1553,397.1374,379.1035,308.967,		unknown
sp698	Positive	433.1	271.1	4.43	271.1,415.0652,337.0557,183.1844,313.1223,285.0913,379.0954,367.0499,		unknown
sp699	Positive	579.164	271	4.1	271,579.1162,331.074,433.1756,561.2666,543.265,533.0183,518.7632,	Apigenin 7-O-neohesperidoside (Rhoifolin)	Flavonoid	putatively annotated
sp700	Positive	433.106	283	3.54	283,415.1843,401.1544,137.0966,271.0227,283.0149,337.0689,373.0757,	Isovitexin	Flavonoid	putatively annotated
sp701	Positive	433.113	283.1	3.74	283.1,313.0167,415.0993,337.0497,367.0208,379.2376,397.1294,416.8976,	Apigenin C-glucoside	Flavonoid	putatively annotated
sp702	Positive	433.113	283.1	3.99	283.1,283.0603,415.0808,313.0172,337.058,367.0972,379.1794,397.0867,		unknown
sp705	Positive	435.1	285.1	3.53	285.1,415.0952,313.1035,397.1328,283.0286,367.056,307.0292,191.1525,	Naringenin C-hexoside	Flavonoid	putatively annotated
sp708	Positive	435.3	330.8	5.35	330.8,331.0491,315.0503,403.1381,316.1419,312.136,284.0225,270.0862,	Tricin O-phenylformic acid	Flavonoid	putatively annotated
sp710	positive	439.1	114.124	0.84	114.1238,277.0109,379.026,421.0875,210.9581,199.1088,217.056,259.0026,		unknown
sp711	positive	441.1	176.181	1.98	176.1811,193.2057,424.1407,158.1,200.2634,218.2825,398.7467,375.4069,		unknown
sp712	positive	441.1	184.057	6.57	184.0566,355.215,418.2913,422.9586,267.2401,217.0744,112.8913,99.1201,		unknown
sp720	Positive	447.1	297.1	3.86	297.1,404.2497,428.9579,149.0974,340.9233,161.5495,431.0836,382.795,	Acacetin C-hexoside	Flavonoid	putatively annotated
sp721	positive	448.1	124.153	2.03	124.1526,268.1124,106.0612,344.1273,250.121,285.9792,430.1663,149.9414,		unknown
sp724	Positive	449.1	299.1	3.43	299.1,431.2262,298.9021,137.16,389.0202,413.1121,329.1534,403.1736,	Luteolin 6-C-glucoside	Flavonoid	putatively annotated
sp725	Positive	449.1	299.2	3.27	299.2,124.1449,431.1243,251.1155,269.1416,285.8175,388.9689,355.4183,	Luteolin C-hexoside	Flavonoid	putatively annotated
sp726	positive	449.1	287.041	3.88	287.0408,373.4123,109.3391,289.3201,124.0925,136.92,353.16,387.0439,		unknown
sp727	positive	449.1	287.078	2.01	287.0781,124.1084,431.0632,269.0781,106.08,315.0678,330.9383,231.0723,		unknown
sp728	positive	449.1	298.975	3.45	298.9746,329.0541,353.0627,431.0739,383.0869,413.1487,287.0556,395.0535,		unknown
sp729	positive	449.1	347.13	6.04	347.1298,371.2068,287.0871,431.1936,353.0377,343.5056,413.1156,341.1313,		unknown
sp730	positive	449.1	406.218	7.4	406.2181,388.1911,286.3053,431.14,121.3795,195.2798,182.1129,277.0593,		unknown
sp731	positive	452.1	128.173	1.33	128.1734,317.2635,290.1753,368.1067,376.733,398.359,155.0957,86.6422,		unknown
sp732	positive	452.1	311.228	7.65	311.2281,434.2821,155.1326,317.1855,280.1678,237.1784,217.2036,391.2903,		unknown
sp735	positive	453.1	130.094	2.41	130.0939,291.0515,172.1798,134.0897,273.1233,116.0674,405.412,417.0955,		unknown
sp736	positive	453.1	210.248	7.01	210.2479,436.3409,156.0441,417.408,337.933,270.9904,227.1533,133.3771,		unknown
sp738	positive	454.1	184.083	7	184.0826,436.2649,286.1812,251.8778,118.2001,327.5838,413.0863,311.4554,		unknown
sp740	Positive	454.2	313.3	8.23	313.3,391.1902,433.262,373.1417,419.3817,283.1812,268.9994,301.1168,	LysoPE 16:0	lipids	standard
sp746	Positive	458.1	116.3	0.82	116.3,439.3767,284.3222,135.2071,200.1508,283.224,201.3769,337.5184,	Aspartic acid di-O-glucoside	Amino acid derivatives	putatively annotated
sp749	positive	459.1	453.383	4.37	453.3834,114.1425,228.22,341.2469,208.7534,232.1241,415.3839,322.224,		unknown
sp753	Positive	463.1	313.1	3.5	313.1,445.1774,137.1767,431.1508,403.2364,371.1154,321.1782,434.9705,		unknown
sp754	Positive	463.1	313.1	3.87	313.1,331.0659,445.1638,137.1,403.1117,151.1333,161.19,315.0607,		unknown
sp755	Positive	463.1	313.2	3.63	313.2,367.1004,343.0883,397.0943,445.0768,427.0676,409.1812,391.0569,	Chrysoeriol 8-C-hexoside	Flavonoid	putatively annotated
sp756	Positive	463.1	331.2	4.64	331.2,344.814,403.0364,378.0553,387.054,446.9323,382.6873,348.29,	Chrysoeriol C-hexoside	Flavonoid	putatively annotated
sp757	Positive	463.1	331.2	4.99	331.2,150.9948,445.1884,389.1344,449.1445,207.0559,407.2162,119.0141,		unknown
sp758	Positive	463.1	331.2	5.1	331.2,151.0648,445.311,449.1873,389.245,207.0473,119.0518,407.1407,		unknown
sp760	positive	463.1	301.015	4.31	301.0151,463.0906,286.0023,419.0832,355.0513,265.6454,380.8007,433.32,		unknown
sp762	Positive	463.2	301.1	4.33	301.1,463.1071,444.9559,367.0714,403.7624,375.12,151.098,302.209,	Chrysoeriol 7-O-hexoside	Flavonoid	putatively annotated
sp763	positive	464.1	184.173	6.52	184.1728,104.1055,446.2332,125.0212,302.0187,189.2806,85.8501,337.9463,		unknown
sp764	positive	464.1	302.039	4.31	302.0392,446.1833,287.1,387.2401,422.9529,372.0983,227.164,183.1479,		unknown
sp765	positive	464.1	403.151	7.4	403.1511,421.2345,446.4825,137.0671,192.9843,234.7221,161.7066,321.7015,		unknown
sp768	Positive	465.1	303	0.88	303,345.0505,446.9794,429.0215,315.1095,405.047,313.16,369.0172,		unknown
sp770	positive	467.1	369.221	5.74	369.2213,349.08,333.12,449.08,351.1835,251.2027,211.1733,269.0063,		unknown
sp771	Positive	468.1	184.4	7.22	184.4,104.1817,450.2685,427.3494,407.3697,408.27,150.0787,85.9421,		unknown
sp772	Positive	468.1	184.4	7.38	184.4,450.3571,104.0975,125.1026,86.04,391.2766,285.2447,185.2,	LysoPC 14:0	lipids	standard
sp777	Positive	468.3	184	7.24	184,184.1346,408.0361,450.3041,300.276,332.9978,202.2014,350.1383,		unknown
sp778	Positive	468.3	184	7.4	184,212.3351,230.2755,283.2633,408.2057,425.2492,268.1014,244.0513,	LysoPC 14:0 (2n isomer)	lipids	putatively annotated
sp780	positive	470.1	308.023	2.02	308.0232,185.1419,203.103,395.0165,159.3059,162.1714,452.2408,166.1442,		unknown
sp781	positive	470.1	308.109	0.87	308.1088,290.1357,272.4152,248.0889,128.2029,452.2847,218.2101,434.0196,		unknown
sp785	positive	472.1	251.118	2.27	251.1182,349.3346,454.0867,359.7709,346.1693,224.0413,430.7811,437.5471,		unknown
sp786	positive	473.1	112.949	0.77	112.9488,292.865,210.9456,374.9747,176.9463,226.907,104.2869,193.1316,		unknown
sp788	positive	474.1	327.142	2.14	327.1423,345.1381,456.1247,284.1026,259.0836,242.1029,132.0626,347.7762,		unknown
sp790	Positive	474.2	327	2.11	327,210.0916,327.0889,399.165,313.0312,212.2372,381.9772,129.1825,	10-Formyl-THF	Others	putatively annotated
sp792	positive	476.1	195.062	8.05	195.0622,420.2491,177.0493,459.2437,282.3109,434.9927,402.1953,307.0009,		unknown
sp794	positive	477.1	327.118	4.01	327.1185,459.128,381.1404,357.1327,441.1049,411.117,423.1332,405.0996,		unknown
sp796	positive	477.1	434.253	8.27	434.2535,416.2053,314.3176,459.0702,195.0711,238.0609,250.08,149.2328,		unknown
sp797	Positive	477.2	258	1.88	258,279.03,458.9169,315.0351,188.0396,164.6765,370.7657,328.8402,	D-Pantothenic dcid	Organic acids	putatively annotated
sp798	Positive	477.2	315	0.83	315,446.8772,222.7033,303.2726,459.0487,468.5079,205.8824,262.0686,		unknown
sp799	Positive	478.1	306.6	7.92	306.6,460.2522,251.1505,442.1229,419.4626,418.1492,199.1543,395.9811,		unknown
sp801	Positive	478.6	460.6	7.9	460.6,149.0982,201.1292,173.0936,219.1247,165.2567,137.2663,167.2154,		unknown
sp802	Positive	479	317.1	3.89	317.1,461.1647,177.1445,137.2332,189.1818,149.1023,449.1767,355.1566,	methylQuercetin O-hexoside	Flavonoid	putatively annotated
sp804	Positive	479.1	383.5	3.98	383.5,461.1044,449.2852,313.0617,299.0084,433.084,411.1029,325.136,		unknown
sp805	Positive	479.118	317.1	3.09	317.1,460.8879,377.2898,378.9478,361.14,381.075,320.2419,314.4869,	Selgin 5-O-hexoside	Flavonoid	putatively annotated
sp806	Positive	479.2	317.2	0.88	317.2,316.9383,298.9236,197.05,137.0418,257.0318,227.0158,209.0838,		unknown
sp807	Positive	479.2	317.2	3.89	317.2,479.0901,359.0676,419.4024,329.0738,294.6779,390.9765,461.184,	Isorhamnetin 5-O-hexoside	Flavonoid	putatively annotated
sp809	Positive	480.1	184.5	7.35	184.5,462.3479,206.1796,444.4216,125.1328,283.1834,408.2021,350.6188,	LysoPC 15:1	lipids	putatively annotated
sp810	Positive	480.1	339.9	8.46	339.9,462.2763,308.2812,265.3427,155.0276,197.9225,419.3071,124.0513,	LysoPE 18:1	lipids	putatively annotated
sp811	Positive	480.5	339.2	7.76	339.2,480.2563,337.2202,338.2506,462.32,366.292,148.2968,398.1,		unknown
sp812	Positive	480.5	339.2	7.89	339.2,480.2528,462.3393,308.3048,265.2087,155.13,419.28,198.0986,		unknown
sp813	Positive	480.5	339.2	8.3	339.2,480.3412,462.2512,421.1684,420.1,109.2091,155.4807,85.9662,		unknown
sp814	Positive	480.5	339.2	8.45	339.2,480.3381,462.3277,308.1793,265.2606,154.9744,419.2585,135.2,	LysoPE 18:1 (2n isomer)	lipids	putatively annotated
sp815	positive	481.1	114.136	1.35	114.1363,162.1358,188.1222,282.614,340.4263,144.2118,96.1008,463.0992,		unknown
sp821	Positive	482.3	184.1	7.65	184.1,464.3415,104.1281,125.0585,299.2,283.1616,86.0618,405.0705,		unknown
sp822	Positive	482.3	184.1	7.82	184.1,211.1545,193.0928,151.1902,133.1286,179.1395,209.169,464.0125,	LysoPC 15:0	lipids	putatively annotated
sp823	positive	483.1	188.125	1.8	188.1255,465.2791,423.1839,162.1731,116.055,321.0356,440.3689,110.3431,		unknown
sp825	positive	484.1	184.154	3.47	184.1535,104.1622,466.2094,322.2071,424.0089,125.1557,234.0043,188.1188,		unknown
sp827	positive	484.1	273.996	7.4	273.9957,428.1451,353.2072,466.1424,460.5153,401.994,410.0693,364.1713,		unknown
sp828	positive	484.1	322.138	0.87	322.1376,355.0373,466.0901,188.1021,377.1173,424.4477,231.0667,393.894,		unknown
sp830	positive	484.1	322.183	1.12	322.183,355.0913,466.0458,442.2341,177.0732,304.0201,113.1071,235.0276,		unknown
sp832	Positive	485.1	323.1	4.03	323.1,323.0271,467.1772,425.103,437.0476,335.6493,420.9337,133.189,		unknown
sp833	positive	485.1	365.16	2.1	365.16,347.1078,467.2846,441.2023,227.6181,322.8416,305.0169,424.74,		unknown
sp838	positive	490.1	162.124	1.25	162.1238,188.084,401.9691,472.0133,127.1172,206.0568,386.7363,430.1687,		unknown
sp839	positive	492.1	124.098	4.27	124.0983,193.1656,316.1962,180.1647,198.0692,369.2542,91.0447,431.8783,		unknown
sp840	positive	492.1	337.219	7.96	337.2191,474.2498,320.2411,76.0225,431.9782,189.3056,199.2446,95.3005,		unknown
sp843	Positive	492.3	184	7.04	184,429.0922,473.066,268.1357,124.0642,455.1318,329.0375,162.1636,		unknown
sp844	Positive	492.3	184	7.19	184,183.091,184.1405,474.0655,444.8118,399.1349,468.7704,433.1198,	LysoPC 16:2 (2n isomer)	lipids	putatively annotated
sp845	Positive	492.3	184	7.59	184,184.1192,474.3852,104.1093,460.5706,380.1238,432.18,415.1333,		unknown
sp846	Positive	493.1	331	4.27	331,475.0903,432.8578,109.9428,435.1372,403.0472,409.2881,354.9434,		unknown
sp847	positive	493.1	338.293	7.96	338.2933,475.3343,321.3589,76.0263,109.2169,161.0679,95.1508,120.6687,		unknown
sp853	Positive	494.3	184.2	7.64	184.2,184.1316,476.2719,104.0562,453.1716,86.1024,311.3782,462.818,	LysoPC 16:1 (2n isomer)	lipids	standard
sp854	positive	495.1	213.04	0.9	213.0396,495.0043,276.965,332.9469,314.9754,272.9611,199.0524,397.0117,		unknown
sp855	positive	496.1	225.119	3.65	225.1186,179.126,478.1139,136.9781,149.189,161.7497,436.0753,351.062,		unknown
sp856	positive	496.1	367.14	2.14	367.1404,188.1008,349.1,478.1092,162.1277,129.168,450.1371,453.1405,		unknown
sp860	Positive	496.3	184.2	8.1	184.2,184.1038,104.0061,478.2412,86.08,313.32,124.8481,185.4043,		unknown
sp862	Positive	497.1	331.3	5.54	331.3,479.1645,298.4824,469.0819,465.0282,283.0846,461.1,451.0588,	Tricin 4'-O-syringyl alcohol	Flavonoid	putatively annotated
sp863	Positive	497.1	331.3	5.67	331.3,467.2746,479.1777,391.18,465.0781,339.0136,435.2711,256.9906,		unknown
sp864	positive	497.1	306.221	7.72	306.2206,460.14,479.2527,365.0057,437.0185,442.2787,362.1848,382.97,		unknown
sp866	positive	497.1	331.079	5.72	331.0788,479.0337,426.823,379.1809,335.4619,415.1721,311.1908,325.0513,		unknown
sp868	positive	497.1	479.356	8.14	479.3556,436.7251,184.1911,104.13,317.04,461.3825,133.1479,415.0498,		unknown
sp869	positive	498.1	313.195	8.26	313.1949,438.3192,417.3601,454.3358,480.0554,457.1201,258.8942,474.0345,		unknown
sp872	positive	498.1	332.104	5.72	332.1043,368.9512,480.188,456.6795,372.0622,316.3844,430.9608,335.1395,		unknown
sp875	positive	498.1	480.336	8.3	480.3361,236.16,457.1929,330.0542,475.1131,443.0183,185.1133,103.9958,		unknown
sp879	positive	500.1	439.174	7.94	439.1739,482.3436,184.2224,104.1235,187.1891,480.2627,470.1068,328.1035,		unknown
sp880	positive	501.1	203.13	6.25	203.13,451.1813,483.2207,387.24,441.0386,338.9034,349.8,273.912,		unknown
sp881	positive	501.1	458.29	7.95	458.2901,338.2574,360.2723,164.0618,120.9717,483.6128,439.9487,427.298,		unknown
sp882	Positive	124	78	0.94	78,108.1977,107.0866,109.1156,65.9842,106.0327,78.1084,79.9694,	Nicotinic acid	Nucleotide and its derivates	putatively annotated
sp886	Positive	507.1	331.2	3.95	331.2,489.2361,403.0141,401,470.8139,345.0988,326.993,151.0912,		unknown
sp887	Positive	507.1	331.2	4.11	331.2,489.0016,137.1401,131.1424,490.9685,163.0234,345.42,187.124,	Tricin O-glucuronic acid	Flavonoid	putatively annotated
sp888	positive	507.1	188.1	2.2	188.1,162.1814,277.9987,402.9398,332.0265,488.9972,395.7815,362.974,		unknown
sp889	Positive	508.1	152.4	3.41	152.4,177.0679,332.1518,472.1117,170.3682,152.1,403.975,464.5479,		unknown
sp894	Positive	509.3	347.1	0.84	347.1,347.2042,363.2466,468.3148,345.2505,291.0866,257.0177,165.339,		unknown
sp897	Positive	510.1	184.4	8.54	184.4,492.3509,104.1564,454.4015,254.1863,488.4286,469.3578,125.336,		unknown
sp907	positive	511.1	198.178	8.32	198.1775,343.14,493.2189,103.9957,139.128,314.2593,478.5927,86.0187,		unknown
sp909	positive	511.1	349.128	3.04	349.1281,421.086,413.025,451.8206,203.16,493.2461,185.2146,469.1153,		unknown
sp910	positive	512.1	184.205	7.38	184.2047,104.0696,494.1821,258.0972,452.1544,125.25,490.08,240.12,		unknown
sp911	positive	513.1	137.058	0.77	137.0576,235.0175,219.0124,316.9714,414.8864,250.9996,332.9186,430.9939,		unknown
sp912	positive	513.1	453.004	1.45	453.0043,477.1821,369.4011,472.1711,429.3225,188.3799,339.0318,401.0339,		unknown
sp914	positive	515.1	177.141	4.5	177.1414,145.101,303.0043,347.1961,173.1917,466.8098,497.0302,439.3232,		unknown
sp920	Positive	136	118.1	1.09	118.1,119.0643,107.139,65.0094,76.9264,109.0577,118.04,79.3062,	DL-homocysteine	Amino acids	putatively annotated
sp924	Positive	518.2	184.1	7.36	184.1,500.3664,104.1756,125.0244,257.9848,86.04,335.1275,462.2303,		unknown
sp925	Positive	518.2	184.1	7.49	184.1,104.097,500.3007,477.0292,125.0089,187.2061,457.2612,441.1442,	LysoPC 18:3 (2n isomer)	lipids	putatively annotated
sp926	Positive	518.3	459.3	8.1	459.3,104.1247,478.7487,457.6812,477.0389,435.8113,454.6058,475.0361,		unknown
sp929	Positive	520	184.5	7.81	184.5,502.1977,125.0294,258.224,86.1537,185.2241,104.088,166.1528,		unknown
sp932	Positive	520.3	502.2	7.8	502.2,502.3213,184.1809,104.1982,283.0911,325.2,504.155,423.1567,		unknown
sp938	positive	522.1	184.186	8.39	184.186,504.3476,86,124.9333,103.9449,186.3383,188.8583,70.68,		unknown
sp940	positive	522.1	268.113	1.91	268.1133,360.0094,402.3015,282.148,504.1872,420.9642,373.1705,430.3029,		unknown
sp941	positive	522.1	318.038	4.65	318.0384,506.1444,282.0383,374.6939,124.1172,468.2806,445.7465,344.7635,		unknown
sp943	positive	522.1	337.299	7.9	337.2986,504.222,263.2432,245.2165,155.1582,417.2624,350.2583,106.0964,		unknown
sp944	Positive	522.1	504.2	7.95	504.2,459.1248,486.2449,283.0699,368.957,341.9783,360.184,491.993,		unknown
sp945	Positive	522.1	504.2	8.35	504.2,359.933,341.9358,327.8802,268.514,480.9383,482.0184,419.8793,		unknown
sp946	Positive	522.1	504.2	8.5	504.2,370.8883,308.9783,316.8944,486.2196,345.1605,134.1371,284.0842,		unknown
sp948	Positive	522.4	184	8.34	184,184.1038,104.0061,478.2412,86.08,313.32,124.8481,185.4043,		unknown
sp949	Positive	522.4	184	8.49	184,184.1475,504.3365,104.1504,185.1913,186.1658,105.1543,125.1913,		unknown
sp950	positive	523.1	338.265	7.9	338.2654,199.0823,268.9908,505.3158,369.1067,439.1713,306.3049,350.7614,		unknown
sp955	positive	524.1	506.359	8.39	506.359,184.1707,186.207,104.0162,106.1914,127.1508,164.4121,463.3883,		unknown
sp956	Positive	524.1	184	8.49	184,506.3691,464.252,483.1804,432.226,150.9628,125.0911,86.053,		unknown
sp957	Positive	524.1	184	8.99	184,506.3973,104.0676,185.1931,186.1577,105.1735,106.1007,504.4608,	LysoPC 18:0 (2n isomer)	lipids	standard
sp958	Positive	524.36	184	8.36	184,506.2951,186.205,184.1595,185.1493,104.199,187.1885,504.3275,		unknown
sp959	Positive	524.36	184	9.02	184,184.1074,185.1433,186.1583,506.3984,124.9964,85.9875,339.3423,		unknown
sp961	positive	525.1	282.164	5.61	282.1644,300.0228,507.1995,342.12,483.3557,276.3383,391.0819,193.1628,		unknown
sp966	positive	527.1	269.202	9.18	269.2022,398.2494,310.1386,283.2417,509.3215,185.3713,466.32,219.6,		unknown
sp973	Positive	527.1	331	5.59	331,375.1467,153.0791,509.178,343.0612,137.0524,315.0965,181.0872,	Tricin 4'-O-β-guaiacylglycerol	Flavonoid	putatively annotated
sp974	Positive	527.1	331	5.73	331, 315.0583, 316.1618, 332.632, 269.88, 286.9615, 282.48, 285.1065,		unknown
sp975	Positive	527.2	331	4.15	331, 527.1273, 329.1881, 336.9245, 467.0771, 447.0983, 314.643, 316.11,		unknown
sp976	Positive	527.2	331	4.29	331, 348.2647, 347.2457, 509.2513, 403.26, 365.1568, 359.2179, 518.8795,		unknown
sp996	Positive	538.1	184.4	6.48	184.4, 520.3749, 104.0761, 502.3557, 125, 331.1072, 417.0134, 463.0643,		unknown
sp997	Positive	538.1	184.4	6.59	184.4, 520.1976, 341.0615, 280.9144, 497.4232, 456.1417, 396.8165, 529.1748,	LysoPC 19:0	lipids	putatively annotated
sp999	positive	541.1	379.11	3.19	379.1095, 361.0945, 203.1943, 352.9929, 402.9649, 412.9479, 333.1036, 397.2,		unknown
hua001	positive	287	213	2.55	213, 269, 231.1, 137,	Cyanidin	Anthocyanins	putatively annotated
hua002	positive	301.1	286	2.84	286,	Peonidin	Anthocyanins	putatively annotated
hua003	positive	303	229	2.45	229, 285.1, 257, 201,	Delphinidin	Anthocyanins	putatively annotated
hua004	positive	303	229	3.7	229, 285, 257.1, 229.1,	Delphinidin	Anthocyanins	standard
hua005	positive	303	229	3.86	229, 285, 257.1, 229.1,	Delphinidin	Anthocyanins	putatively annotated
hua006	positive	331.1	260.7	2.41	260.7, 314, 286, 260,	Malvidin	Anthocyanins	putatively annotated
hua007	positive	331.1	260.7	2.7	260.7, 314, 286, 260,	Malvidin	Anthocyanins	putatively annotated
hua008	positive	433.1	271	2.82	271, 415, 245, 286,	Pelargonidin 3-O-beta-D-glucoside（Callistephin chloride)	Anthocyanins	putatively annotated
hua009	positive	449.1	286.8	2.49	286.8,	Cyanidin 3-O-galactoside	Anthocyanins	putatively annotated
hua010	positive	449.1	287.3	2.49	287.3,	Cyanidin 3-O-glucoside (Kuromanin)	Anthocyanins	standard
hua011	positive	463.123	301	2.89	301, 286,	Peonidin O-hexoside	Anthocyanins	putatively annotated
hua012	positive	465.1	303	2.46	303, 397.9,	Delphinidin 3-O-glucoside (Mirtillin)	Anthocyanins	putatively annotated
hua013	positive	465.1	303	2.82	303,	Delphinidin 3-O-glucoside (Mirtillin)	Anthocyanins	putatively annotated
hua014	positive	479	317	2.79	317, 418, 298.8, 245.2,	Petunidin 3-O-glucoside	Anthocyanins	putatively annotated
hua015	positive	479	317	3.08	317, 461, 418, 376,	Petunidin 3-O-glucoside	Anthocyanins	putatively annotated
hua016	positive	535.1	287.5	3.02	287.5,	Cyanidin 3-O-malonylhexoside	Anthocyanins	putatively annotated
hua017	positive	577.1	425.3	1.97	425.3, 559, 541, 425,	Procyanidin A3	Proanthocyanidins
hua018	positive	595	270.9	3.22	270.9, 577, 433, 287,	Pelargonin	Anthocyanins	putatively annotated
hua019	positive	605.1	271.6	3.48	271.6,	Pelargonidin 3-O-malonyl-malonylhexoside	Anthocyanins	putatively annotated
hua020	positive	611	287	2.01	287, 592.9, 448.9, 574.8,	Cyanidin 3,5-O-diglucoside (Cyanin)	Anthocyanins	putatively annotated
hua021	positive	611	287	2.38	287, 314.8, 355.1, 271,	Cyanidin 3,5-O-diglucoside (Cyanin)	Anthocyanins	putatively annotated
hua022	positive	611	303	2.98	303,	Delphinidin 3-O-rutinoside (Tulipanin)	Anthocyanins	putatively annotated
hua023	positive	625.4	301	2.92	301, 261,	Peonidin 3, 5-diglucoside chloride	Anthocyanins	putatively annotated
hua024	positive	625.4	301	1.91	301, 261,	Peonidin 3, 5-diglucoside chloride	Anthocyanins	putatively annotated
hua025	positive	627.15	303.1	2.81	303.1, 501, 403.9, 188.2,	Delphin chloride	Anthocyanins	putatively annotated

## Sheet: Table S3
Table S3. Data matrix of 985 metabolites signals in 114 rice accessions.
name	SR01	SR02	SR03	SR04	SR05	SR06	SR07	SR08	SR09	SR10	SR11	SR12	SR13	SR14	SR15	SR16	SR17	SR18	SR20	SR21	SR22	SR24	SR26	SR27	SR28	SR31	SR32	SR36	SR39	SR44	SR45	SR47	SR49	SR50	SR51	NR03	NR04	NR05	NR09	NR10	NR100	NR101	NR102	NR103	NR104	NR105	NR106	NR108	NR109
hua001	6015.14	100	1912.52	65294.9	178952	1942.4	13819.3	104933	164233	100	25908.2	567.583	99607.9	245045	36680.7	28737.2	23821.7	721.256	100	100	100	100	5670	100	100	100	100	100	100	100	100	100	100	100	46451.2	100	100	100	100	100	100	100	100	100	100	100	100	100	100
hua002	96349.3	91845.6	81932.3	245365	314228	253762	49212.7	66127.8	298473	52410.7	92033.6	138152	122096	144656	128345	759096	68606.7	66351.4	79338.9	34830.8	34390.3	52535.5	58399.2	54421.5	52157.6	50768.4	32190.4	33421.6	36108.8	33576.6	91785.8	42219	62126.8	21450.9	149406	132568	91996.1	109505	103888	111462	150294	125155	213181	78742	130383	169614	266950	114782	101288
hua003	546.66	320.823	1168.79	22083.2	1364.09	100	4871.51	40781.7	26777	478.874	548.896	100	407.466	100	373.274	111324	1442.97	100	813.653	455.776	100	554.251	1928.46	175.929	656.123	530.951	471.391	532.098	144.1	339.789	390.424	359.195	557.079	2460.04	100	267.963	685.955	974.087	2981.59	1853.59	452.078	147.194	802.456	295.884	375.742	282.056	455.736	367.618	666.935
hua004	11961.5	9401.64	5030.63	188569	271263	12009	16743.5	1.45059e+06	466761	12519.9	27269.6	1796.8	118233	328847	245334	729480	38937.4	3815.76	5408.79	652.784	3406.91	2679.07	2360.86	989.831	743.176	328.804	956.624	1172.69	1039.88	158.929	1229.51	779.331	3109.83	915.149	257160	502.335	1107.92	460.45	701.496	73.6635	148.14	350.582	707.772	1351.04	1181.83	1380.09	699.687	465.951	830.608
hua005	33.9775	14583	1471.03	272.963	3097.6	6744.11	1159.43	2201.59	301.871	1098.97	6665.53	1074.51	3921.45	1536.36	761.598	3935.88	636.543	952.444	611.119	1146.68	527.746	967.069	2083.89	2097.76	7.87656	1035.99	778.905	794.2	2278.2	991.087	351.751	1379.47	1268.55	1554.49	335.723	358.29	1007.06	1267.65	1313.36	2.72001	1239.33	912.585	12.3222	5.27684	14.3578	1049.29	1232.35	2538.43	437.019
hua006	2104.48	3609.2	2759.62	6963.3	9390.33	495.875	400.03	1514.08	308.742	464.947	24337.9	8157.65	2600.77	6743.4	7634.75	6654.74	3204.27	1066.66	1532.8	425.784	590.047	848.072	3509.24	1117.19	11949.1	558.061	978.864	555.235	110.382	209.006	1526.38	883	860.022	1221.18	389.612	1062.37	2526.86	804.235	438.131	2143.05	1330.77	3700.12	794.573	574.877	1920.07	755.937	733.503	705.02	576.95
hua007	301.303	217.136	338.69	424.151	558.33	574.16	354.66	257.736	815.602	1469.19	171.19	570.89	1277.18	487.623	151.382	304.542	687.942	519.907	811.918	280.594	386.254	1556.16	601.82	183.326	188.839	485.861	603.269	731.138	394.317	726.882	346.578	500.041	169.352	371.811	587.093	792.595	1522.56	743.996	96.784	474.817	94.8739	550.88	831.566	596.148	406.303	334.136	981.36	644.411	762.308
hua008	28007.5	108422	57971.3	34029.2	19288.9	19961.4	28571.2	43757.5	26771	15204.4	100713	1.13193e+06	9308.57	24380.2	34250.4	180134	38424.1	53689.7	87137.8	49270.6	14825.1	22795.7	44801.3	47078.8	31529.5	48599.6	46505	45107.3	117998	29952.3	89026	96399.5	51752.1	44965	53249.4	311668	172985	218768	173286	154747	299386	201276	340038	104216	141047	200934	644095	282746	212584
hua009	100	3279.49	1858.54	25655	100	6807.97	100	100	100	6133.29	27357.5	8350.69	100	100	100	100	100	100	3483.84	2202.79	10431.7	100	12384.8	505.376	1331.86	5456.84	5476.35	15781.4	12925.3	1870.18	1261.73	768.662	1709.59	2348.1	100	4130.11	100	5957.56	1328.87	100	100	100	100	12371	13460.4	19041.7	5425.12	3850.57	2418.82
hua010	11801.3	100	1419.73	100	94295.4	8878.49	4169	100	100	12895.4	9483.43	10814.7	100	100	100	100	18357.3	37530.2	9041.78	3879.91	2393.52	8192.04	1997.37	2252.5	3950.43	100	10308.5	17021.4	14979.8	2144.68	613.558	9034.44	1774.24	9126.56	100	100	3688.81	3998.99	4786.17	567.46	6221.68	100	12609.9	16119.8	22282.9	27521.2	4481.82	7677.51	1843.98
hua011	175748	322296	269920	569415	796525	91715.3	157810	100	66162	37186.9	400482	724493	96673.5	162348	185229	455248	209360	277745	199221	121834	53170.9	99103.2	115866	182308	186972	187767	114505	79902.3	149014	109525	413640	198335	131729	91440.2	237091	654222	511272	545312	510639	525695	631083	575454	962922	322821	608334	797374	1.29964e+06	570603	526963
hua012	4857.61	1537.11	2161.19	636209	100	3099.18	3105.21	100	100	1299.52	134061	1188.13	100	2.87194e+06	100	7.94203e+06	34494.5	1452.77	651.826	349.304	1822.73	787.675	8654.16	636.481	1302.9	1221.63	1241.42	1057	1072.42	11571.5	1075.54	153.8	855.006	960.785	100	2047.26	2526.36	2618.47	1856.7	2351.66	6318.82	474.556	1023.64	940.217	1963.71	2118.69	1489.09	2870.3	303.359
hua013	50929.6	7323.16	6537.04	553126	1.32069e+06	24987.5	8979.39	1.06124e+07	4.24642e+06	19984.3	745829	6319.45	3.25282e+06	6.63833e+06	1.80415e+06	2.07996e+06	242068	2476.68	2101.47	3389.72	3114.57	4339.68	3508.1	3735.75	2063.62	5654.46	2732.57	3310.06	1475.01	1517.97	4448.41	1932.97	6136.91	1649.44	6.05594e+06	4708.59	6163.64	4109.44	1999.96	5153.89	5493.55	3958.19	8483.14	6075.94	3031.03	5189.32	5277.79	4155.75	2127.24
hua014	20100.6	57240.6	68385.6	74313.9	87254.7	51882.4	64895.3	217415	276385	13896.5	140609	153395	86526.8	100	179111	139254	93880	52256.7	17821.1	14513	15567	21853.1	23459.9	36775.5	15945.1	37464.7	17465.5	30596.6	40109.9	14424.6	101059	46352.7	15495.9	35246.6	179272	181350	136500	135404	113315	123329	216739	129857	292405	85444.9	104603	127827	312978	106459	73578.8
hua015	87206.6	35582.1	24790.2	1.14435e+06	1.73406e+06	147736	39274.3	1.61054e+07	4.38226e+06	75088.7	1.71868e+06	13058	4.23928e+06	8.5088e+06	914757	1.49699e+06	731874	4211.75	30597.5	8058.21	27464.9	16269.4	32918.8	16866.3	17595.8	8281.86	7832.8	6782.52	8811.92	3289.04	6600.04	7760.21	40561.4	4853.67	1.39629e+07	19343.6	12269.2	24507.8	11805.4	7741.48	100	9561.61	100	9263.43	25317.8	30227.3	100	22495.8	8037.81
hua016	95.1288	115.52	75.9048	463.06	174.892	290.496	181.78	203.709	887.183	100.399	197.118	138.989	125.878	249.643	63.7314	307.208	67.1785	87.6113	137.975	124.561	49.7755	120.18	172.19	76.8244	292.554	153.616	115.909	303.841	111.254	151.878	56.267	29.9843	108.766	52.3326	195.892	50.9373	158.798	102.641	220.531	121.76	413.47	76.1895	290.314	64.1298	214.857	196.016	18.5412	252.883	173.687
hua017	3799.8	15136.1	8249.33	2300.69	7191.16	6417.25	46887.3	8528.56	2847.57	4548.93	169.203	94.017	3666.41	5517.58	1187.45	2219.52	1114.16	21.701	31572	105.099	15875.2	1800.17	21667.1	5227.48	9199.14	308.077	154.205	27.5303	73.1142	51.6328	75.6821	109.138	4700.87	264.932	1610.85	103.704	121.882	213.605	155.551	76.6133	46.7736	30.1048	44.3924	52.3951	203.868	95.2238	99.872	97.5738	45.0479
hua018	130.754	539.523	96.7173	50.2185	88.722	101.327	226.663	249.859	350.255	130.949	110.648	156.857	38.6744	239.598	355.947	218.885	102.053	108.97	161.941	339.571	99.561	105.502	188.66	104.685	311.135	411.517	517.101	114.73	96.3131	326.313	235.3	172.013	36.2886	53.6544	90.5971	625.195	166.625	289.437	130.809	112.086	678.765	129.835	193.607	216.341	185.619	769.159	190.183	1326.19	338.003
hua019	49535.2	52136.9	50523.9	74280.6	52940.2	60691.5	86290.9	35860.1	26493.2	59161.9	55141.6	39812.4	42219.6	85298.3	24658.4	49325.8	60398.5	64766	30989.3	32715.6	51572.4	29759.3	66423.9	42797.6	38604.4	65622.3	51673.6	46919.5	52927	28656.4	43712	64736.6	42360.5	25947.3	38827.3	28369.4	21791.3	30146.1	34089	33951.8	36512.8	33511.1	62497.7	50079.5	27491.9	65645.2	83433.9	48710	48896.4
hua020	49558.4	100	100	3.14118e+06	8.75905e+06	3560.89	2285.28	4.88367e+07	3.71445e+07	14190.7	2.69397e+06	4659.04	5.43295e+06	1.70787e+07	2.44263e+07	1.05e+08	644757	7314.34	1340.55	1842.13	900.735	860.004	729.205	990.776	807.698	1704.33	855.589	2357.26	1665.67	913.037	3910.64	1135.21	1557.07	1069.18	4.67863e+06	2615.39	2222.92	2974.12	1473.93	1049.87	1035.58	1247.73	2619.59	1540.56	655.833	784.929	579.292	760.392	681.775
hua021	1105.26	561.465	560.607	100	100	287.91	956.543	100	3116.63	382.627	2289.56	47.6348	100	2480.37	1241.38	3088.89	100	774.478	254.724	1156.08	427.201	538.471	264.376	485.423	657.769	58.0198	591.818	356.92	112.23	85.1902	413.474	204.177	377.213	291.667	100	178.646	107.601	187.894	713.853	466.291	190.34	134.479	320.62	436.18	203.748	967.665	508.018	560.464	431.127
hua022	32672.7	43811.4	42639.1	170832	221430	49328.5	27116	179947	138154	7159.78	111768	79168.3	11965.4	34024.9	40502.6	82714.5	57610.9	34333.1	26759.2	19595.2	10451.2	20621.1	25287.7	25324.8	27994.1	22503.1	13612.7	7883.29	16403.7	17321.9	55033.1	19391.3	13938.6	9656.21	84265.9	71736.6	46991.5	54573.9	48947.6	49326.3	81960.8	59463.7	106854	32880.5	61306.6	72960.2	148669	53249.2	54014.1
hua023	222.282	1498.33	2590.79	44387.8	52992.8	2212.07	326.669	27702.3	21060	6790.36	9842.53	3360.96	38660.6	45356	7010.49	15214.8	10860.7	351.483	404.571	631.936	1754.69	604.681	1870.32	1669.32	1176.81	512.974	628.244	1373.34	998.786	296.984	2027.67	1437	767.991	534.619	24846.1	334.356	529.499	1744.36	2380.28	1378.11	1998.93	1438.17	3437.42	456.972	4411.76	4423.09	4368.94	1932.94	1872.46
hua024	56.0078	165.048	62.8573	149663	215248	75.4415	54.0582	336893	100	128.635	563.418	607.205	71395.8	131338	177850	85948.3	136.587	85.1361	19.449	49.2554	12.3377	116.63	27.9595	234.88	61.7523	59.5111	11.7544	117.187	291.007	136.677	70.4919	41.7098	94.7338	22.3863	186279	15.3463	148.136	131.064	99.1028	500.297	246.747	12.7949	62.4309	142.017	109.564	241.29	31.0322	40.6423	27.345
hua025	1388.03	441.115	263.926	10476.6	30794.2	276.28	286.831	157065	31673.6	790.335	17557.2	487.365	61932.6	122936	21186.9	22145.9	855.554	1225.59	659.379	352.55	383.5	228.599	123.857	310.721	658.453	1444.44	363.497	42.7796	724.146	157.095	153.526	643.251	519.222	440.798	123734	611.292	254.899	484.839	382.221	114.541	2560.45	396.014	99.6013	809.37	354.606	1522.19	464.803	1445.62	948.172
sp001	289745	338178	324066	245376	389030	407651	410550	336273	366082	302868	651525	619412	371800	354376	342263	398684	212319	334816	266510	276264	356099	221307	368444	519113	635238	332436	345007	315431	647338	295162	218088	443748	378670	281520	179277	311498	585168	469137	235129	558642	420844	656029	343158	206721	317160	582567	604446	394482	215273
sp005	238962	97737.4	88432.8	518789	864494	359039	120048	161899	200044	659282	1.13837e+06	518152	298223	413091	2.21746e+06	543110	136397	287872	58962.9	137528	85896.3	73658.1	84558.7	101088	167492	131700	336172	162605	229836	266397	54100.9	623357	91278.9	140614	169444	149948	298658	209181	190213	188980	287758	374285	150310	452086	645820	591669	198941	183311	91111.5
sp006	3.57224e+06	3.36677e+06	4.91686e+06	2.63671e+06	4.05493e+06	5.63557e+06	6.06786e+06	4.54818e+06	6.05898e+06	1.1666e+07	1.00523e+07	1.45894e+07	5.71231e+06	5.99055e+06	6.82883e+06	1.52821e+07	4.37512e+06	3.32617e+06	4.16764e+06	3.15528e+06	6.65421e+06	2.94338e+06	8.02071e+06	4.57939e+06	4.83337e+06	5.28086e+06	7.84178e+06	1.1498e+07	8.30266e+06	4.15385e+06	2.40947e+06	6.12061e+06	4.27601e+06	9.53456e+06	2.90645e+06	4.51361e+06	4.63804e+06	4.73215e+06	4.42037e+06	3.44037e+06	7.20093e+06	4.76084e+06	4.89731e+06	5.13731e+06	6.09636e+06	6.14008e+06	6.07896e+06	5.25733e+06	3.32616e+06
sp007	85246.9	79546.3	87092.1	114297	92695.8	89924.4	76066	107129	125953	77531.2	116295	85529.6	96065.9	96308.5	92228.5	136821	96800.7	69852.3	71899.3	84501.4	77500.5	76811.9	40485.5	114279	119205	102089	92559.3	41328.3	74865.6	82858.3	77860.8	62176.7	35741.5	30359.1	66641	89232.3	78210.9	64087.5	75205.1	83083.2	100326	85528.2	108966	159081	147226	189623	54071.2	82713.8	83464.5
sp009	54514.6	116143	362403	426142	984777	274395	14324.7	69780.3	60974.2	59776.5	733416	293749	286389	245977	665362	792399	441272	71891.1	6135.15	502170	52300.4	105581	51374.8	137361	793482	20403.2	177578	176656	167870	60401.5	26991.8	107898	94691.1	151201	19332.5	77215.2	150435	139127	135797	169574	67511.2	109022	76451.7	17403.1	225122	229581	134321	122333	25678.8
sp010	838459	1.86577e+06	1.18622e+06	2.84773e+06	2.12431e+06	985903	1.04533e+06	1.76626e+06	2.83069e+06	1.33561e+06	2.66663e+06	2.7299e+06	1.52728e+06	1.32547e+06	3.01525e+06	2.76337e+06	2.95078e+06	1.31075e+06	1.4426e+06	898202	1.63291e+06	2.02527e+06	1.44412e+06	1.31736e+06	1.51336e+06	1.38514e+06	1.72864e+06	2.8166e+06	1.9392e+06	1.1981e+06	1.00811e+06	2.66606e+06	1.08317e+06	2.43601e+06	2.32992e+06	1.3368e+06	1.07646e+06	979362	1.18525e+06	1.19523e+06	1.18292e+06	1.40467e+06	1.37998e+06	1.33858e+06	1.38224e+06	1.546e+06	1.54877e+06	1.26152e+06	1.26774e+06
sp011	2.01297e+06	3.61379e+06	2.18914e+06	5.2893e+06	4.35034e+06	2.82408e+06	2.57007e+06	3.92522e+06	5.15119e+06	4.1031e+06	7.96814e+06	9.84873e+06	3.78022e+06	3.46143e+06	6.59758e+06	8.24602e+06	5.10543e+06	2.52238e+06	2.59215e+06	2.26539e+06	3.44214e+06	3.99071e+06	3.16689e+06	2.59078e+06	3.87434e+06	2.65016e+06	4.47883e+06	5.60253e+06	4.50904e+06	2.03438e+06	2.07021e+06	5.18284e+06	2.02399e+06	5.44053e+06	4.74639e+06	2.54266e+06	3.15332e+06	3.8234e+06	2.43023e+06	2.71553e+06	3.1903e+06	3.3486e+06	3.16251e+06	3.68611e+06	4.20047e+06	3.88574e+06	3.2358e+06	3.27695e+06	2.07751e+06
sp012	2.89059e+06	6.19024e+06	3.61082e+06	4.07764e+06	4.20834e+06	5.95678e+06	4.97565e+06	5.34844e+06	5.92914e+06	3.75191e+06	8.21468e+06	9.17468e+06	5.16291e+06	4.75294e+06	7.47497e+06	7.83447e+06	7.36713e+06	6.5004e+06	5.6541e+06	4.20136e+06	4.01787e+06	4.80901e+06	4.0941e+06	6.47146e+06	7.50712e+06	6.94243e+06	8.06245e+06	1.03027e+07	1.29755e+07	3.97233e+06	3.29692e+06	1.26045e+07	4.39136e+06	9.15499e+06	5.22231e+06	8.3506e+06	8.67195e+06	9.07638e+06	8.63716e+06	9.33877e+06	7.55463e+06	1.22381e+07	7.531e+06	9.40793e+06	1.12142e+07	1.03515e+07	1.07715e+07	8.47519e+06	6.73823e+06
sp013	653172	760039	599453	1.08194e+06	671685	677013	1.34325e+06	1.19587e+06	1.05284e+06	589750	4.96449e+06	5.15147e+06	1.37019e+06	1.03231e+06	1.26064e+06	1.17614e+06	1.03591e+06	955031	857646	901397	928976	502239	883079	2.0376e+06	3.30072e+06	833187	918917	678605	1.21894e+06	389769	494127	766459	502485	780671	525409	767308	1.25891e+06	1.31621e+06	586678	1.52071e+06	1.20147e+06	2.74079e+06	778060	1.46734e+06	2.13644e+06	1.43262e+06	1.6495e+06	1.66101e+06	423788
sp015	2.95676e+06	2.53089e+06	4.60498e+06	3.8554e+06	3.93125e+06	3.26594e+06	4.28387e+06	8.45846e+06	6.01955e+06	4.93649e+06	1.02858e+07	1.13625e+07	7.82256e+06	7.92318e+06	7.88189e+06	3.86298e+06	3.44377e+06	2.80789e+06	2.96977e+06	3.09958e+06	2.24914e+06	3.70659e+06	3.6699e+06	3.93178e+06	2.44881e+06	2.40112e+06	4.83112e+06	3.40448e+06	3.40443e+06	2.52911e+06	2.53781e+06	2.04624e+06	2.11415e+06	4.33157e+06	3.72776e+06	2.76304e+06	3.32725e+06	3.87849e+06	3.63892e+06	3.80097e+06	4.43932e+06	4.42265e+06	3.18596e+06	3.43433e+06	3.31126e+06	3.73012e+06	2.80872e+06	3.7337e+06	3.49281e+06
sp017	74071.8	69939.1	61536	93469.7	84105.4	59022.3	42551.5	37600.7	94524.4	23969.3	68739.2	73606	39909.1	15151.3	134347	12294	4388.1	18988.1	13499.1	14909.2	34068.9	20981.2	14236.9	21382.7	31682.7	12018.2	21680.7	36101.6	34825.9	18243.5	14508.7	81285.9	81594.8	22197.1	55053.3	29987.3	16916.3	17618.4	16924.5	6686.46	24019.6	31896.1	6514.44	26173.4	32823.7	36941.5	37411.4	26038	14655.5
sp018	20386.5	14413.5	35539	26402.4	14448.6	13010.1	34653.8	26668.9	16686	26974.9	176813	275715	13918.2	14571.2	29566	24064.5	23338.6	10035.8	5570.67	27537.8	4818.78	19021.6	25021.2	9119.16	45314	36799.4	21109.5	15603.4	46026	24006.7	21393.1	28395	6911.33	8279.19	8733.33	6977.35	33176.6	9365.45	13642.4	23875	41840.8	28566.2	41875.9	26713	43008.6	59395.4	17721.7	55959.7	6218.67
sp019	311704	422502	360629	514325	283078	336002	542616	410592	412769	355337	499972	273529	401930	436139	405093	668976	373247	441486	382337	382502	368738	361875	226663	433992	484471	452964	456944	283600	392283	248324	346711	349117	284452	207842	451528	306650	308346	318297	365937	349306	441305	392643	445713	599914	702299	596212	205569	384210	372923
sp020	2.85412e+07	2.93114e+07	1.43936e+07	1.9207e+07	2.86971e+07	4.10171e+07	4.28858e+07	2.12947e+07	3.01033e+07	5.27288e+07	1.04416e+08	1.10972e+08	3.32562e+07	2.90256e+07	4.7607e+07	7.14936e+07	1.93677e+07	1.85943e+07	2.0565e+07	2.26995e+07	2.8486e+07	2.1977e+07	3.11517e+07	5.09596e+07	1.06405e+08	2.20355e+07	3.99947e+07	2.88904e+07	3.88455e+07	2.35953e+07	1.10905e+07	3.29788e+07	2.95893e+07	2.35446e+07	1.21217e+07	5.50782e+07	5.23741e+07	1.41123e+08	7.09295e+07	7.81421e+07	1.06261e+08	1.02292e+08	8.92205e+07	1.3009e+08	1.98889e+08	1.92799e+08	6.53575e+07	1.05741e+08	7.44584e+07
sp022	1.71422e+07	2.81134e+07	2.43846e+07	2.64385e+07	2.25496e+07	5.91063e+07	4.17351e+07	3.22794e+07	4.94144e+07	2.44236e+07	9.84297e+07	1.14369e+08	4.07959e+07	4.13142e+07	3.34531e+07	2.80248e+07	2.72109e+07	2.84229e+07	2.31756e+07	2.7439e+07	2.2826e+07	2.02399e+07	3.35238e+07	4.93836e+07	6.33392e+07	2.66137e+07	2.40411e+07	2.60781e+07	6.04016e+07	2.28938e+07	1.65566e+07	2.87798e+07	2.07694e+07	2.08765e+07	1.98241e+07	2.18094e+07	2.60159e+07	3.21188e+07	2.09537e+07	3.31195e+07	3.29121e+07	5.32851e+07	1.71278e+07	3.10115e+07	4.81923e+07	3.73031e+07	3.66584e+07	3.33775e+07	1.9347e+07
sp023	1.81067e+06	3.41415e+06	2.63214e+06	6.26966e+06	4.09654e+06	2.02703e+06	9.07884e+06	5.44675e+06	3.39272e+06	2.5086e+06	6.20621e+06	5.84943e+06	4.79048e+06	4.83783e+06	1.95735e+06	7.79082e+06	3.92719e+06	2.92325e+06	7.37793e+06	4.81346e+06	9.22775e+06	2.35624e+06	6.20716e+06	5.02689e+06	5.36772e+06	2.3226e+06	1.12701e+07	4.38247e+06	5.83798e+06	2.87159e+06	2.56263e+06	5.84931e+06	1.11944e+07	4.74608e+06	2.84851e+06	1.86029e+06	3.08712e+06	2.09943e+06	2.34049e+06	2.92322e+06	3.69639e+06	4.43629e+06	3.11837e+06	9.30539e+06	1.08629e+07	1.03205e+07	3.10093e+06	6.26034e+06	4.28142e+06
sp024	2.45397e+07	3.29302e+07	2.83263e+07	3.12082e+07	3.98956e+07	3.47757e+07	3.23421e+07	7.46362e+07	2.28312e+07	2.426e+07	5.23644e+07	3.24968e+07	3.10118e+07	4.4917e+07	4.00115e+07	5.38949e+07	3.03375e+07	2.65508e+07	2.4733e+07	4.70375e+07	3.05856e+07	4.63465e+07	2.67086e+07	2.85843e+07	5.78893e+07	4.78422e+07	4.17137e+07	2.33116e+07	3.24814e+07	3.05768e+07	1.81721e+07	2.85494e+07	3.05405e+07	2.7358e+07	2.65582e+07	3.99551e+07	5.01015e+07	4.14058e+07	3.37024e+07	4.04852e+07	3.48735e+07	4.27301e+07	3.70342e+07	3.77587e+07	1.96607e+07	1.71965e+07	4.28312e+07	3.73887e+07	3.27392e+07
sp025	1.15379e+06	666008	2.13307e+06	1.69641e+06	1.84297e+06	880040	1.40304e+06	880471	2.54015e+06	1.2209e+06	1.99645e+06	2.65503e+06	973259	1.24408e+06	626738	2.41988e+06	6.22607e+06	645152	770952	2.55294e+06	1.08076e+06	1.10487e+06	2.0049e+06	2.11013e+06	3.05237e+06	1.48374e+06	1.96171e+06	790359	796360	601326	1.11953e+06	2.40858e+06	397689	560348	486749	504875	2.15689e+06	1.98936e+06	934801	1.6681e+06	977378	684938	1.37301e+06	1.65905e+06	4.42694e+06	2.14046e+06	705719	1.50547e+06	2.5979e+06
sp026	2.93873e+06	2.94185e+06	3.40845e+06	2.63115e+06	2.33186e+06	4.43048e+06	4.48574e+06	3.92197e+06	4.20449e+06	3.48417e+06	7.56289e+06	8.01748e+06	3.76351e+06	3.72767e+06	5.51693e+06	5.13628e+06	3.40873e+06	3.88495e+06	2.92632e+06	3.24885e+06	4.02651e+06	2.76095e+06	4.0037e+06	5.17793e+06	6.7156e+06	4.16417e+06	3.43962e+06	4.11999e+06	9.14654e+06	3.44272e+06	2.37593e+06	5.74519e+06	3.73871e+06	3.82664e+06	2.71406e+06	4.19036e+06	6.69313e+06	5.78405e+06	4.14151e+06	5.76225e+06	4.74993e+06	7.6776e+06	4.66179e+06	5.43002e+06	6.1162e+06	5.79912e+06	6.32226e+06	5.41845e+06	3.36087e+06
sp027	21360.2	27333.3	14797.5	38593.6	23288.8	23619.4	49334.3	48151.1	26853.6	24734.6	89843.4	360101	5656.34	38281	28812.2	337788	26571.9	54279.2	38222	31410.3	42630.9	32305.5	85153.5	98070.9	107764	37705.6	390798	54028.9	118465	23413.7	33929.8	380018	13867.5	33178.8	21928.7	100099	138917	186563	77190	115618	122826	146847	86374.1	166385	251067	177752	155312	80982.6	146716
sp028	111441	151513	92874.5	143389	121848	103201	222079	219529	157688	110402	822671	828947	223739	200665	197091	166477	160671	123684	129376	155673	153967	76846.6	170022	325138	573461	127428	140052	116362	183252	73203.4	87688.2	146618	59253	117551	101567	139222	187300	208185	95764.3	250798	204623	410900	116240	296237	397306	219655	306178	274186	75607.9
sp029	29206.2	11642.2	23217.5	62240	138526	32938.2	24111.2	939683	247615	33587.1	763465	223958	213103	297940	222884	42313.6	111932	100371	58326	47243.1	24503.1	75164.9	60147.6	70923.2	55125.4	26241.1	32820.6	57778.9	48786	19263.1	18306.1	184736	17743.5	37886.8	525089	42035.2	45564.3	81997.4	17350.4	11237.5	25549.5	38250.9	12800.2	24710.8	48300	31514.6	31632.9	7510.18	4807.51
sp030	125017	160566	100385	223771	185942	180224	138815	127897	265159	211993	238736	306266	97923.1	111846	285982	251687	80301	104329	23864.1	130120	39144.6	130783	121540	23417.6	91455.9	390969	333399	368313	437439	319817	185555	361943	268557	424158	124967	275400	332591	368747	271366	337150	329163	404146	212685	310164	301970	337539	272157	226865	185040
sp031	211372	206746	222004	206132	204608	224967	216053	212608	211050	207123	184844	198804	204979	211659	197810	200427	197056	203691	211020	209403	214641	229172	231103	232448	226671	218945	217397	264813	245720	244379	237291	246705	214078	230481	214878	205113	214968	222134	219224	199855	190398	187618	180416	172676	165820	148081	166886	168480	178482
sp032	58928.1	85082.8	56650.4	130021	79956.9	87659.8	145057	119968	137450	53670.3	593814	583882	164415	136124	149961	116359	107123	67106.3	80140.3	106507	115571	59452.9	83227	232887	363450	75318	113502	102253	150908	37816.9	53860.6	107018	44151.9	94199.6	63613.5	75190	151688	105056	56094.1	148713	128954	288176	67335.6	171372	178768	172562	169297	188985	64362.1
sp033	2480.39	27596.8	12096.7	36526.2	51813.3	12138.7	16458.4	14712.5	25028.1	17250.4	382595	68042.6	39767.7	24790	39229.6	34977.2	22196.6	11463.5	15401.2	48481	55022	16826.6	92425.5	44609.2	63395.4	18712.6	67828	11263.2	32354.1	6187.34	12751.9	30089.5	9740.93	11844.2	17766.6	11759.2	6398.59	21907.9	7896.76	16407	18451.7	37843.1	5884.18	26643.8	36066.7	14218.2	22802	32816	5142.27
sp034	29761.3	73039.8	27545.5	126552	155412	56708.2	28742.9	57459.7	111236	46312.4	1.08957e+06	231266	139401	72111.7	132408	88660.3	53341.4	33340.8	35080.8	118336	105025	48954.8	317573	51594.2	155679	27927.6	212437	39368.3	71095.7	26284.9	45617	112459	7030.07	29637.3	66987.9	43502	42708	68525	21441.2	37418.3	48279.9	121868	19158.5	72080.1	99529.1	95684.7	108623	102856	8363.33
sp035	5885.3	45039	30185.1	41813	18884.2	11329.2	22734.2	15964	7120.06	17604.6	8134.68	37582	21335.6	12354.2	13551.2	9783.08	12397.2	9976.1	8843.43	168.922	7030.84	15739.6	3856.25	15950	18438.1	22115.5	43419.2	15442.7	8367.19	2847	15061	15004.4	22336.7	22905.8	11848.9	27881.6	43317.1	27459.2	22108.7	55181.3	42579.5	47363.1	16928.5	12523.1	53647.2	37341	38132.1	50635.1	26441.4
sp036	205946	292875	130871	266152	232592	412397	287671	213760	470219	333657	376104	584155	227612	166096	312011	465261	210030	211376	179554	269557	258454	177933	302634	168219	217952	224695	345109	348980	230769	275096	230246	261062	164951	279421	61986.1	375785	364885	304877	348362	439999	398747	372716	291064	549285	469415	392035	316182	331719	174145
sp038	1.6285e+06	2.99332e+06	1.47658e+06	2.83332e+06	2.1427e+06	2.09269e+06	1.58285e+06	881204	1.99294e+06	1.69002e+06	1.3162e+06	2.18132e+06	859079	992674	1.80783e+06	1.68337e+06	936704	1.19037e+06	1.13252e+06	1.04331e+06	1.21099e+06	1.16226e+06	861397	1.06281e+06	1.11678e+06	2.33315e+06	3.07984e+06	3.91066e+06	3.67324e+06	2.78052e+06	1.71635e+06	3.60729e+06	2.08763e+06	2.65116e+06	1.2303e+06	3.79912e+06	3.3503e+06	3.57159e+06	3.17549e+06	4.22684e+06	3.7447e+06	4.62157e+06	3.16001e+06	3.05027e+06	3.53725e+06	3.5989e+06	2.7968e+06	3.2411e+06	2.54839e+06
sp039	461929	983713	921529	1.24071e+06	987584	716516	843422	2.1124e+06	733852	581212	1.24608e+06	1.19012e+06	824412	974311	1.51226e+06	801387	1.23326e+06	1.13721e+06	1.15798e+06	573116	589554	624578	528124	719172	995142	792169	858027	694992	958723	527340	743197	867420	630782	527331	1.0006e+06	1.72531e+06	1.37382e+06	1.58902e+06	1.01548e+06	951927	862908	1.40483e+06	820175	825835	1.0211e+06	733982	1.40396e+06	940002	815583
sp041	1.19131e+06	1.08187e+06	1.43861e+06	2.4826e+06	1.45872e+06	1.42583e+06	1.85621e+06	1.8021e+06	1.41163e+06	1.78408e+06	7.17233e+06	5.92093e+06	3.30264e+06	3.63891e+06	2.95059e+06	1.22009e+06	2.17878e+06	2.36907e+06	1.43423e+06	3.14387e+06	3.01439e+06	1.66656e+06	1.86904e+06	4.52312e+06	5.18336e+06	1.88432e+06	2.98957e+06	1.81697e+06	3.16791e+06	866922	1.19104e+06	2.70158e+06	1.43361e+06	1.38117e+06	1.33465e+06	1.85154e+06	1.952e+06	1.33663e+06	1.09872e+06	3.36869e+06	1.28959e+06	2.85926e+06	1.52222e+06	3.36123e+06	3.46447e+06	3.66892e+06	2.79345e+06	3.40985e+06	1.51717e+06
sp042	429299	317045	319231	331895	512613	347006	425566	602373	547238	412222	3.85699e+06	2.38204e+06	490165	493889	640264	361601	335353	380210	357543	337460	338611	450970	406141	376432	402565	509025	383483	398279	691253	290837	334022	509443	292514	206897	339679	623616	699406	1.06322e+06	789585	763717	795932	964932	571342	547994	742342	643590	969200	1.02393e+06	589946
sp043	68491.3	159900	60336.6	194741	130631	82050.5	134045	301976	294295	95013.9	5.88135e+06	1.98163e+06	260662	272814	467687	106419	48205	115665	57679.9	98523.5	81380	100	83590.2	305209	122515	232311	128510	118828	480402	101109	66782.3	285107	74214.7	61304.8	121287	208192	305936	537348	308575	393432	733919	837633	258213	544321	843004	508763	469104	681267	255016
sp044	580976	479382	289327	383720	449160	528239	608037	427021	346681	425054	260061	388224	313402	264559	316815	207606	246842	392149	340242	397453	486719	515936	502668	267937	251225	415727	341150	525973	438823	623961	421245	301778	422316	474492	490217	295066	329947	387747	346476	351802	272397	337367	281555	205153	184082	148980	333458	273964	410163
sp045	31179.7	15859.6	31763.7	51680.4	23007.2	25449.3	93314.5	163460	92228.5	43260.1	99595	59602.6	52333.8	47492.8	51431.6	30920.1	90937.3	44138.1	34656.4	19677	46334.4	100	36007.1	80887.1	38432	33717.4	27022.5	47240.7	33050.7	25041.8	31802.9	36341.4	40329.1	23271.1	25145	22109.8	24445.5	100	14167.3	67441.2	48237.3	44378.5	55590.6	100	57746.1	82668.8	100	45980	42247.1
sp046	60489.5	57684.4	44940.7	457803	416048	63161.6	68299.1	253247	328352	20275.2	130045	95612.3	213809	233186	146230	251907	56465.2	11437.2	30619.2	17055.3	29050.5	22880.6	33956.5	23263.8	16519.1	991.775	3514.79	15496.9	3792.21	4253.24	6768.09	5050.71	44831.3	13350.5	102996	7602.7	11603	4880.93	2202.89	10393.6	12139.3	50156.6	12770.5	7709.6	20922.6	5006.19	12869.6	285.835	2433.28
sp047	80915.1	143342	101578	91930.4	83031.4	104816	76224.4	99464.2	99803.5	88570.4	312909	162627	107692	73744.6	111526	96664.5	71805.2	86971.1	122170	74843.6	113996	187547	134928	140805	103919	84069.6	118860	60549.8	101904	74611.6	69082.4	105259	80304	83912.4	81733.8	81065.3	87482.3	116592	63675.2	74220	109809	120046	41074	159008	118564	69803.5	90080.5	104684	64989.8
sp048	64837.9	145910	35563	154201	127753	48675.5	158372	141988	69951.2	133637	537507	162344	17746.7	34364.6	113141	80811.8	244831	19438.3	39886.3	201027	99063.5	69696.9	219345	55539.9	66391.5	112144	152830	124459	96469.2	86562.7	42897	71362.6	211389	105294	50503.5	119694	129415	57305.9	129329	61786	72115.4	50013.9	59871.1	61184.4	65747.3	61495.7	30004.1	52531.5	56452.9
sp050	50908	75772	33733.4	38849.5	86648.5	62920.5	246273	242590	146582	135583	784895	414421	132448	111669	154713	122536	150820	50020.5	76864.8	65397.1	85167.1	79094.7	90341.6	47510.7	52241	180869	146609	153144	389789	37823.5	97989.6	218839	124416	116930	153311	78803.4	86180.8	117128	77881.2	62057.4	78778.9	90657.5	60284.3	47099.4	49700.1	47171.7	106835	68050.3	33355.7
sp051	6.81785e+06	7.11615e+06	6.61061e+06	7.14272e+06	6.18341e+06	6.49711e+06	7.67639e+06	6.64091e+06	6.98548e+06	7.47593e+06	6.80757e+06	6.02213e+06	7.50672e+06	8.18659e+06	5.37706e+06	7.95277e+06	8.07598e+06	8.30844e+06	6.98794e+06	6.13033e+06	7.16971e+06	7.55795e+06	7.39017e+06	7.11933e+06	7.1106e+06	9.1547e+06	8.58872e+06	8.89161e+06	8.75599e+06	7.95977e+06	8.47882e+06	9.06095e+06	8.28602e+06	8.87264e+06	8.28391e+06	6.6928e+06	6.5116e+06	6.50692e+06	7.08903e+06	7.44961e+06	7.42244e+06	8.03819e+06	7.90531e+06	8.37295e+06	9.41257e+06	9.37321e+06	7.58543e+06	7.86298e+06	8.10071e+06
sp052	45442.7	8800.3	95282.6	59867.6	116766	21451.9	47463.1	29715.1	1810.93	17970.2	66244.9	117432	67764.8	33434.2	24617.8	63777.6	35107.6	50544.5	53541.7	410.315	102393	29787.7	22475.8	27256.7	16656.5	41171.6	165049	116363	71011.5	24716.4	69624.6	38801.5	20933.4	55800.7	46644.1	13787.6	57417.2	19233.2	52617	214.48	60157.7	61510.7	50926.8	13997.6	40266.5	79272	14597.9	108694	29240.2
sp053	212617	276253	232723	247881	295829	192671	323472	249176	207827	345740	375934	476155	260998	276786	409736	329246	377275	340735	370129	281802	432730	529187	398247	516547	477911	226250	309770	329246	263600	363244	268134	279883	272004	240102	424178	306688	319776	367534	279300	306947	316701	353327	377485	555927	515797	571807	282026	282275	346679
sp054	485505	309133	199449	99347.6	1.12952e+06	140697	215988	142915	11664.9	114949	79213.5	100730	272466	100983	110670	819999	125086	102937	183941	233249	96942.3	364986	44584	519586	135523	190256	137094	138741	338015	290488	184106	120313	177250	236160	117776	1.0717e+06	1.20265e+06	1.00227e+06	544340	1.35238e+06	760359	1.18879e+06	1.16044e+06	1.93548e+06	1.85747e+06	1.5794e+06	850776	740246	814921
sp055	191519	165857	293708	266680	395103	219371	339486	182517	254375	265334	296919	391967	243398	286596	672728	315471	174978	172721	89030.1	213294	290688	143005	253089	175954	301407	232837	100	151793	271343	161571	174901	163893	120568	220025	295084	180125	308611	390503	181219	189462	289396	483663	153912	247432	239619	205503	314184	263822	231396
sp056	6.33158e+07	6.30207e+07	5.27727e+07	5.63302e+07	8.65079e+07	8.11423e+07	7.06209e+07	6.64173e+07	7.73574e+07	7.05011e+07	1.29851e+08	1.12723e+08	6.32259e+07	6.69054e+07	1.85456e+08	9.24784e+07	5.70443e+07	7.62158e+07	7.02095e+07	5.08997e+07	4.41045e+07	7.55051e+07	9.22121e+07	5.36413e+07	9.06621e+07	8.03027e+07	1.2868e+08	7.58373e+07	9.51406e+07	5.25303e+07	5.15476e+07	1.35005e+08	4.26181e+07	5.97396e+07	4.81295e+07	1.08382e+08	1.17706e+08	1.27335e+08	9.67817e+07	6.48919e+07	1.1125e+08	1.0908e+08	8.02351e+07	9.88806e+07	1.29028e+08	9.85372e+07	1.22159e+08	6.73954e+07	5.68863e+07
sp057	1.94395e+06	2.71321e+06	1.98033e+06	1.07064e+06	1.1594e+06	2.61404e+06	3.02427e+06	1.8137e+06	1.84052e+06	1.37654e+06	1.12061e+06	2.3172e+06	1.58162e+06	1.46117e+06	2.84982e+06	1.38457e+06	1.28605e+06	1.61159e+06	1.94193e+06	1.13945e+06	2.36818e+06	2.18322e+06	2.16889e+06	1.7111e+06	1.24073e+06	1.79094e+06	2.67528e+06	1.65511e+06	4.02975e+06	1.43756e+06	2.30125e+06	2.25681e+06	1.60937e+06	2.06105e+06	1.95141e+06	1.40514e+06	2.1957e+06	1.73746e+06	1.36079e+06	1.1763e+06	1.76116e+06	1.71422e+06	1.39252e+06	1.03898e+06	824666	741764	1.85241e+06	1.11317e+06	1.09015e+06
sp058	123709	129819	89583.6	160642	71120.6	100271	122052	126368	154124	69768.2	207897	234599	39021.4	42481.2	115752	169016	92969.8	135086	101406	200944	133317	126968	47868.4	99584.5	94147.1	125351	317919	370308	148957	196049	145188	571694	105056	283637	80549	67381	109370	42148	21834.1	47647.4	66337.8	24778.4	84033.7	16705.3	42227.7	44547.1	408038	21337.2	336394
sp059	9198.79	13658	16558.3	27247	10896	6320.69	11436.1	12933.9	100	11270.1	112496	95495.1	32554.4	100	38760.6	38938.4	16720.5	100	22790.3	28061.2	4159.39	13149.6	41574.7	20920.5	45724.5	19516.2	100	100	46990.4	100	32597	18231.5	13522.4	56241.1	32686.7	31008.9	18620.1	34121.8	100	22011.2	59547.7	28213	18327	20489.6	32958.6	23985.8	29972.2	25780.4	100
sp060	9.64393e+06	1.75774e+07	1.35999e+07	1.60399e+07	1.36529e+07	3.75784e+07	2.49301e+07	2.01449e+07	3.15694e+07	1.50468e+07	5.99894e+07	7.09499e+07	2.40472e+07	2.64293e+07	2.04572e+07	1.77749e+07	1.67729e+07	1.711e+07	1.38884e+07	1.61696e+07	1.33767e+07	1.21941e+07	2.06673e+07	3.10301e+07	4.07003e+07	1.67565e+07	1.45071e+07	1.46901e+07	3.69607e+07	1.35537e+07	1.07062e+07	1.80551e+07	1.3179e+07	1.24188e+07	1.07868e+07	1.33168e+07	1.59505e+07	2.00396e+07	1.40208e+07	1.8445e+07	2.04758e+07	3.18703e+07	1.04679e+07	1.88076e+07	2.83211e+07	2.2848e+07	2.19734e+07	1.98639e+07	1.17021e+07
sp063	2.32938e+07	3.17628e+07	4.38199e+07	4.8956e+07	2.54981e+07	2.94032e+07	5.38845e+07	5.11735e+07	3.73276e+07	2.68264e+07	1.65066e+08	1.66371e+08	4.88669e+07	4.25487e+07	4.92974e+07	3.14962e+07	4.4391e+07	3.39244e+07	2.52793e+07	4.45181e+07	3.18095e+07	2.19987e+07	3.46147e+07	6.42889e+07	7.63949e+07	3.68873e+07	2.89735e+07	2.3483e+07	6.04165e+07	2.15011e+07	2.30088e+07	3.51031e+07	2.64905e+07	2.14086e+07	2.13227e+07	2.73515e+07	3.38905e+07	2.99471e+07	2.44284e+07	4.24086e+07	3.59547e+07	5.75264e+07	2.79526e+07	4.65643e+07	5.32639e+07	3.94744e+07	4.4406e+07	4.98867e+07	1.56657e+07
sp065	1.50884e+07	3.56382e+07	3.25934e+07	2.94633e+07	1.73964e+07	2.71924e+07	2.33656e+07	2.07421e+07	2.06594e+07	1.33258e+07	2.41959e+07	2.91891e+07	2.57285e+07	2.48171e+07	4.85706e+07	9.44457e+06	2.46161e+07	3.22139e+07	2.96959e+07	3.32161e+07	3.06351e+07	2.91153e+07	1.82718e+07	2.78593e+07	2.08571e+07	3.56721e+07	2.30056e+07	1.65574e+07	2.77853e+07	2.23726e+07	2.45711e+07	4.09218e+07	2.39553e+07	1.76419e+07	3.11416e+07	4.56041e+07	3.70927e+07	2.63113e+07	5.57697e+07	5.29937e+07	3.93469e+07	4.61519e+07	4.16109e+07	5.27601e+07	5.1981e+07	6.56741e+07	3.32513e+07	4.25992e+07	4.22458e+07
sp066	24732.8	3236.12	8118.88	24108.5	94765.4	17994.5	38612.4	17777.2	31818.7	19715.2	29583.3	55845.9	18277.9	32606.9	69465.5	8035.74	37119.2	5523.27	19053.5	21345.4	19281	32386.4	49884.6	6131.31	34365.4	26897.1	29778.1	29006.2	20119	26127.5	16328.2	2350.09	24646	17919.2	14297.9	59798.6	90572.1	11949.7	50683.5	47857.2	45996.5	29382.7	40224.8	51274.3	26697	27619.1	35235.9	11946.9	47342.2
sp067	2.56801e+07	3.00981e+07	1.49572e+07	2.10182e+07	2.63081e+07	5.68557e+07	5.44575e+07	3.30328e+07	6.99023e+07	4.64398e+07	5.47128e+07	5.52847e+07	2.41463e+07	2.24645e+07	6.43279e+07	1.01095e+08	1.9782e+07	2.85558e+07	1.23593e+07	1.25757e+07	2.10448e+07	1.72064e+07	1.67677e+07	1.76688e+07	2.7455e+07	4.81349e+07	4.32288e+07	7.5592e+07	9.88464e+07	1.05081e+07	2.10541e+07	1.00277e+08	1.48573e+07	5.57078e+07	2.49109e+07	1.60433e+07	2.56877e+07	2.73852e+07	2.1401e+07	1.76561e+07	2.61869e+07	5.34169e+07	1.69986e+07	3.00715e+07	4.01279e+07	3.25858e+07	3.81988e+07	1.51171e+07	7.68708e+06
sp068	1.41832e+07	1.73407e+07	1.58098e+07	1.93466e+07	1.63036e+07	1.21351e+07	1.67503e+07	2.48587e+07	1.39022e+07	1.65379e+07	3.06139e+07	2.87442e+07	2.33768e+07	2.3956e+07	2.93852e+07	1.68369e+07	2.35723e+07	1.82515e+07	1.63284e+07	1.91244e+07	2.08492e+07	2.34231e+07	1.68363e+07	1.84646e+07	1.47529e+07	2.30025e+07	3.07522e+07	2.45642e+07	2.65293e+07	1.87933e+07	1.91062e+07	3.28096e+07	2.04334e+07	2.58078e+07	1.91115e+07	2.24067e+07	2.03463e+07	1.92353e+07	2.13146e+07	2.03174e+07	1.9704e+07	2.76877e+07	1.85946e+07	3.33125e+07	3.56651e+07	3.59256e+07	2.17132e+07	2.06478e+07	1.93529e+07
sp071	700397	1.84137e+06	1.34983e+06	1.61714e+06	1.41016e+06	1.61113e+06	1.52001e+06	2.08152e+06	1.48617e+06	9.35222e+06	6.57887e+06	5.56721e+06	1.27795e+06	1.66181e+06	4.68435e+06	2.54638e+06	1.24445e+06	634578	648748	2.26032e+06	1.48163e+06	355001	1.87324e+06	981300	1.49076e+06	3.0327e+06	1.54227e+06	3.08052e+06	5.65792e+06	920273	952758	1.46279e+06	1.11321e+06	1.99127e+06	1.70375e+06	371470	642439	819708	1.04251e+06	504740	1.41309e+06	1.35319e+06	468088	374571	604281	996259	1.01856e+06	475178	90478.5
sp072	145035	99906.6	56216.6	102715	65818.9	236265	210709	81930.5	128266	79799.2	97978.6	114683	170379	94748.5	78259	32159.8	42466.5	8977.88	77360.4	68816	91231.9	192578	85990.6	44676.8	14700.3	71918.9	25089.7	231689	156049	536377	16482.4	28014.5	218637	94357.5	66167.9	48116.2	30202.6	19067.1	19370.3	49542.4	58907.3	125056	49983.7	50208.5	94990.5	224338	21493.2	6323.85	42218
sp073	2.04059e+07	1.58741e+07	2.17644e+07	2.53326e+07	2.33272e+07	3.46236e+07	2.88846e+07	3.04853e+07	1.99745e+07	2.52311e+07	1.75554e+07	9.78968e+07	2.12179e+07	2.06067e+07	1.81619e+07	2.6455e+07	1.7805e+07	2.29265e+07	2.16516e+07	1.44953e+07	3.01325e+07	2.48776e+07	2.15179e+07	1.59247e+07	1.26021e+07	2.8603e+07	5.16515e+07	1.9933e+07	2.00464e+07	2.14223e+07	2.2116e+07	3.26488e+07	3.33067e+07	2.20267e+07	3.3341e+07	6.42799e+07	6.48741e+07	4.55663e+07	7.01574e+07	6.60958e+07	7.50476e+07	9.80275e+07	8.91447e+07	7.28787e+07	7.28966e+07	7.57441e+07	4.2356e+07	6.36932e+07	6.40467e+07
sp074	3.56924e+06	2.56063e+06	2.49324e+06	2.77607e+06	2.00256e+06	3.17527e+06	2.66455e+06	2.61286e+06	1.95411e+06	1.97613e+06	2.11383e+06	2.0676e+06	3.08179e+06	2.96958e+06	3.74046e+06	1.77155e+06	2.18207e+06	3.37248e+06	3.70264e+06	1.67944e+06	4.81641e+06	4.1213e+06	4.31819e+06	2.99683e+06	3.62904e+06	1.01033e+07	6.08881e+06	3.94548e+06	5.15542e+06	5.38602e+06	4.84868e+06	4.87829e+06	3.63064e+06	5.12791e+06	5.47705e+06	2.22429e+06	2.09095e+06	2.37157e+06	3.01029e+06	2.17955e+06	1.9775e+06	2.99122e+06	2.9639e+06	1.39075e+06	1.78853e+06	1.20628e+06	4.3714e+06	2.83605e+06	3.67379e+06
sp075	50388.9	19317.2	15106	5559.99	33504.5	21156.6	20832.6	54894	28859.2	33135.5	86036.2	58510	45906.5	30310.6	45175.2	12731.8	58132.8	36555.4	24015.8	32997.8	14966.2	47874.3	6356.91	36321.7	47640.7	18932	39446.6	25898.6	45334.1	38584.2	53394	17884.6	40523.7	45026.2	68962.7	37261.4	15382.8	13251.1	16668.3	28207.1	16080.4	32376.9	3705.36	20729.1	19795.6	16743	38266	24735.7	22019.2
sp076	16135.7	18202	31388.3	68190.4	77967	24369.5	21198.8	640214	145601	23263.8	477881	151784	139282	168698	193757	49228.1	69283.6	76822.6	31729.1	23296.2	33336.8	30200.6	33411.6	31150.4	35502.8	26788.9	18558.6	27370.9	29054.4	26688.8	17095.3	151112	27275.3	15475.9	298746	25759.9	22555.8	56175.1	30889.2	10708.2	27261	47699.7	25651.4	36763.7	50969.8	15679.1	11831.3	19443.6	3368.37
sp077	28349.2	8586.33	25275.3	34896	66726.8	16177.8	14671	12484.5	42734.3	8902.19	41447.5	244768	23539	23716.9	117419	475239	14156.9	180874	89405.8	23338.3	23427.7	71971.2	101944	115052	27332.2	51990.1	761643	61849.5	107524	26223.9	24384.6	423097	29520.8	46928.3	16237.9	121643	237489	287579	250601	212918	205693	201418	313776	225665	220997	156621	172796	276076	396358
sp078	172318	415127	180895	310647	380055	417334	346985	188460	350379	385160	477796	476302	212041	213246	340910	308074	222578	171157	227339	154241	263805	190880	255079	178199	210474	514899	429830	731794	722388	413691	345712	692201	408385	608250	209753	416422	415297	511980	445792	491394	626031	625280	496910	496168	427905	664055	357784	348853	299363
sp079	459227	435295	744933	566882	571983	895324	683371	795709	805973	637203	1.05795e+06	2.38256e+06	703005	513361	563100	794099	624533	834646	634966	510864	702199	961943	955065	776928	427793	864673	1.33621e+06	577877	658304	629625	608938	746902	853155	889148	873760	1.63166e+06	2.16676e+06	1.63218e+06	2.22926e+06	2.03517e+06	1.76016e+06	2.38293e+06	2.04046e+06	3.55073e+06	2.5402e+06	2.50752e+06	1.67727e+06	1.59106e+06	1.61156e+06
sp080	95647.6	266196	94722.2	203842	146575	199772	171760	220086	105716	256866	529808	621145	257613	422703	228982	351279	291656	240117	212843	187371	251883	375047	480000	242089	363536	207181	473779	266839	390291	232807	182678	299237	192153	198856	148282	596737	437823	353513	244501	472933	348628	458250	237560	382396	579761	333048	408632	320106	248896
sp081	21406.4	20366.6	25455	42018.8	32001.1	21031.2	43702.3	52768.8	31264.2	35282.1	35685.6	34815.8	47234.1	25884.8	27782	18155	41813.6	26628.3	52460.4	38048.8	36580	54486.2	45729.8	34883.2	17201.9	18202.7	53238.5	44743.5	41322.6	25445.4	39116.7	48935.9	39200.3	48957.4	29419.2	31672.9	26034	40028.2	23585.1	38086.8	36726.5	34673	25345.7	97622.4	53466.9	83835.3	37936.1	54034.1	44691.8
sp082	264229	251024	250380	242810	315835	213396	431178	510555	203440	223836	369669	238265	226162	248073	272512	179884	272987	114229	88239.3	148207	303468	126288	236884	176727	155636	327332	383998	284695	431824	252835	272022	353615	207006	337684	321078	330331	513591	413352	197871	173374	221297	378912	153600	42747.1	99930.4	64346.7	275211	117119	65643.7
sp084	2.46313e+07	2.33091e+07	2.28444e+07	3.38821e+07	1.79576e+07	2.58299e+07	1.88903e+07	3.10425e+07	2.93231e+07	3.43055e+07	4.54385e+07	1.57642e+07	2.47464e+07	3.52983e+07	2.14173e+07	4.84653e+07	3.71375e+07	2.07359e+07	2.2636e+07	3.38965e+07	2.45062e+07	2.2913e+07	1.48636e+07	4.07145e+07	4.24766e+07	3.45897e+07	2.02404e+07	1.2264e+07	2.9641e+07	2.20576e+07	2.12913e+07	3.0635e+07	1.37417e+07	1.68553e+07	2.17721e+07	2.33885e+07	1.84581e+07	2.75546e+07	3.03388e+07	2.29969e+07	3.07047e+07	1.90955e+07	3.01446e+07	3.71776e+07	3.61543e+07	4.50748e+07	1.25993e+07	1.873e+07	2.70787e+07
sp085	135504	138507	141414	163549	155249	135773	150943	154916	154521	161911	170209	133971	154239	136800	162227	139104	152153	173586	150657	149015	139670	169293	113312	141100	156480	149071	144423	137984	161465	143876	144662	166077	93406.8	159215	152095	169459	151568	133088	125868	160131	123652	158453	128758	150710	154204	170825	153507	161791	159591
sp086	324572	565716	402105	1.04106e+06	733138	310845	1.50523e+06	906296	583576	444190	966264	960793	867469	732232	322771	1.2992e+06	671282	447437	1.17287e+06	782341	1.56687e+06	395492	1.03873e+06	877691	907149	387691	1.97572e+06	718469	961204	444565	426147	1.1121e+06	2.08801e+06	727919	457263	332750	511467	366185	438146	509201	596611	786080	447662	1.52811e+06	1.73073e+06	1.722e+06	472419	1.12435e+06	595664
sp087	125467	109798	138557	299927	109652	172336	76699.4	298873	155705	119569	248484	116375	94168.8	126309	114830	285782	136375	87541.6	53517	159160	247202	91794.5	85990.8	330907	223620	141098	74381.3	53337.1	160383	246652	61702.2	156116	65039.7	95971.6	186969	122060	96260.8	153499	108015	94829.6	125314	116945	240924	333003	267814	230242	33988.5	62333.1	80051.9
sp088	793801	540995	1.0562e+06	929867	632681	905185	1.08041e+06	1.15925e+06	808273	939674	769339	1.2158e+06	1.62404e+06	1.44991e+06	815953	499279	1.80703e+06	1.79938e+06	1.65382e+06	2.04878e+06	1.03415e+06	1.27059e+06	1.2619e+06	1.42949e+06	752174	1.89732e+06	1.3413e+06	1.61174e+06	1.76834e+06	1.60782e+06	2.31814e+06	1.52973e+06	727449	1.43856e+06	951283	2.65379e+06	2.91798e+06	2.95243e+06	2.7164e+06	2.53775e+06	1.92518e+06	2.42464e+06	3.95489e+06	1.75836e+06	1.91386e+06	2.33446e+06	2.53001e+06	2.21285e+06	3.5042e+06
sp090	2.90265e+06	461981	557926	1.33418e+06	1.24577e+06	2.14264e+06	1.39517e+06	1.07871e+06	2.1103e+06	832975	999826	3.27044e+06	1.51922e+06	1.47711e+06	1.68435e+06	2.38175e+06	2.32403e+06	1.07869e+06	754439	725031	756024	2.99849e+06	1.43688e+06	1.76938e+06	750114	833626	2.59658e+06	1.06719e+06	1.41128e+06	948141	1.01432e+06	1.09747e+06	1.26121e+06	1.38027e+06	1.74498e+06	1.56517e+06	2.37387e+06	2.36662e+06	1.816e+06	3.01582e+06	1.85419e+06	3.3512e+06	1.70746e+06	5.39501e+06	3.92759e+06	3.70638e+06	2.42734e+06	2.83191e+06	2.47476e+06
sp091	984.484	8393.53	17298.8	100	100	25155.6	5760.56	100	1734.18	6495.82	100	17447.6	141431	21237.1	12460.8	100	5981.99	11972	100	4248.36	19178.2	13436.6	13643.2	7792.43	16972.5	70933.6	9826.1	7693.96	14932	19656.3	2557.32	39381.3	55521.3	12305.4	38592.4	95272.8	14703.1	36487.5	100	4904.14	121027	19438.6	9261.45	2263.25	100	119737	128415	100	14645.4
sp092	224200	500458	260237	582744	409258	307059	507823	195069	622901	303684	511891	632563	238885	210675	437488	546720	235792	168228	269421	134138	287382	248206	288539	194759	252109	272014	507293	480721	507639	224073	232892	460410	235866	438605	317086	309988	426871	325745	299988	415495	360084	581229	289427	387590	477143	489820	351459	341094	219264
sp094	135709	368640	194472	92697	102556	442733	103087	120698	30410.8	136701	333125	138517	128260	149319	149065	232537	325303	173661	234234	184293	169157	91406.6	214084	214878	175455	93519.4	163482	193635	410880	259674	188736	116309	101873	103040	116040	231024	680968	111190	422008	209867	208086	278000	139541	118037	234108	43090	248295	156714	72543.3
sp095	5.98436e+06	7.68485e+06	1.38082e+07	1.37125e+07	6.18652e+06	8.13353e+06	8.81926e+06	6.05389e+06	7.62723e+06	8.4722e+06	2.14546e+07	3.03048e+07	1.27162e+07	8.83504e+06	1.13354e+07	1.50349e+07	1.4433e+07	1.05406e+07	5.03178e+06	2.09277e+07	9.41565e+06	6.14023e+06	6.91628e+06	1.23002e+07	2.03002e+07	7.36734e+06	1.64307e+08	1.06508e+07	9.26196e+06	1.09166e+07	5.86713e+06	7.25676e+06	1.09287e+07	9.54618e+06	5.34777e+06	9.96522e+06	1.16319e+07	1.41381e+07	7.97779e+06	1.20867e+07	1.43519e+07	1.81348e+07	1.28472e+07	1.60185e+07	2.76068e+07	4.81794e+07	1.11444e+07	1.64139e+07	8.54308e+06
sp097	1.35208e+06	1.44725e+06	1.28583e+06	974263	1.25084e+06	1.73231e+06	1.44492e+06	1.625e+06	1.84839e+06	1.46124e+06	3.09811e+06	1.9037e+06	2.69694e+06	2.97615e+06	1.64278e+06	1.08747e+06	2.63249e+06	1.91491e+06	3.16871e+06	1.17955e+06	2.49085e+06	3.8893e+06	2.93693e+06	2.51595e+06	2.14019e+06	2.27431e+06	2.38906e+06	1.39124e+06	1.96692e+06	1.57755e+06	2.38555e+06	1.05369e+06	1.52389e+06	1.20575e+06	2.24301e+06	1.71353e+06	1.7256e+06	2.03723e+06	1.09562e+06	1.34728e+06	1.35931e+06	1.81986e+06	981502	1.87441e+06	1.80044e+06	1.37075e+06	1.2451e+06	1.33197e+06	925681
sp098	8.59138e+06	8.72355e+06	1.00155e+07	4.63656e+06	9.02086e+06	7.50805e+06	7.81944e+06	1.01769e+07	4.79958e+06	6.69955e+06	8.99207e+06	9.1782e+06	7.87539e+06	8.07484e+06	1.22543e+07	6.91267e+06	1.09285e+07	1.48054e+07	9.88095e+06	7.6944e+06	6.1433e+06	1.02846e+07	5.35161e+06	1.27682e+07	8.88212e+06	1.51792e+07	1.29391e+07	1.12218e+07	1.85237e+07	9.24563e+06	8.13592e+06	2.67505e+07	9.45379e+06	1.10437e+07	8.53908e+06	2.01445e+07	1.69024e+07	1.38563e+07	2.10537e+07	1.57108e+07	1.53293e+07	1.65384e+07	1.46796e+07	1.85857e+07	1.5855e+07	1.62352e+07	1.72997e+07	1.62608e+07	1.56798e+07
sp099	155802	109664	114104	81476.2	78745.5	204034	146648	22871.8	76921.8	121716	52671.6	77369.3	24756.5	34344.8	64882.3	30111.7	29825	82128.2	76846	65411	102355	127382	88021.2	78217.4	53419.3	286783	138270	210269	258541	333843	94393.5	188940	416522	102210	52014.9	104137	110588	113137	90595.3	126640	172083	209697	122605	128517	116065	186433	81957.3	112157	148040
sp100	559612	695839	409214	866981	636083	549932	1.02558e+06	1.0825e+06	1.08184e+06	546307	4.21554e+06	3.96648e+06	1.09751e+06	1.01183e+06	1.18157e+06	898035	832149	641329	605066	793059	726741	447474	776168	1.54133e+06	2.81246e+06	585420	811447	618191	1.05988e+06	585425	374733	629750	443660	620936	460369	650611	1.09336e+06	951010	577589	1.27797e+06	923097	1.98434e+06	494036	1.14308e+06	1.88468e+06	1.01993e+06	1.38817e+06	1.41102e+06	403495
sp1006	1.74851e+07	2.27412e+07	2.89607e+07	2.04054e+07	1.97444e+07	2.45568e+07	1.81291e+07	2.77394e+07	1.90075e+07	3.80829e+07	1.90293e+07	3.32751e+07	3.21092e+07	3.23366e+07	2.32136e+07	1.91809e+07	3.10785e+07	3.26683e+07	3.00489e+07	4.69249e+07	2.78933e+07	3.27147e+07	3.04038e+07	2.85233e+07	2.70198e+07	7.1565e+06	3.02251e+07	2.82439e+07	2.16287e+07	1.92241e+07	2.2645e+07	1.64929e+07	1.35258e+07	2.9014e+07	1.56071e+07	3.09155e+07	3.47871e+07	4.09724e+07	3.73795e+07	2.70311e+07	3.39482e+07	3.46611e+07	3.01903e+07	4.42535e+07	3.21243e+07	3.18361e+07	3.49142e+07	3.00381e+07	2.82718e+07
sp101	251315	1.68781e+06	409869	2.1936e+06	1.48915e+06	662028	559524	634489	2.76091e+06	690332	944238	1.08693e+06	410523	483244	2.02047e+06	3.30281e+06	1.07127e+06	184510	566093	209217	627985	472178	267426	225011	419822	632621	1.12465e+06	1.83582e+06	924499	350340	278179	1.69414e+06	162919	1.96709e+06	795967	800625	866907	749471	552314	1.02864e+06	834542	1.13614e+06	715902	1.387e+06	1.0374e+06	1.24076e+06	720161	788178	410701
sp1010	2.12658e+07	2.62016e+07	2.62128e+07	2.2147e+07	2.22002e+07	2.47819e+07	2.09761e+07	3.28989e+07	2.10376e+07	3.24147e+07	1.92033e+07	3.40313e+07	3.51809e+07	3.23878e+07	2.18432e+07	2.04667e+07	3.34085e+07	3.20512e+07	3.31202e+07	4.32523e+07	3.02926e+07	3.03771e+07	3.17114e+07	3.07207e+07	2.25645e+07	8.02632e+06	3.00342e+07	3.17112e+07	2.31715e+07	2.1441e+07	2.56009e+07	1.95967e+07	1.48965e+07	2.89e+07	1.61137e+07	2.75258e+07	4.17517e+07	4.05988e+07	3.92064e+07	2.63654e+07	3.27875e+07	3.64382e+07	3.08186e+07	4.60261e+07	3.17527e+07	3.06879e+07	3.34393e+07	2.97308e+07	3.06958e+07
sp1015	7.03668e+06	5.78837e+06	8.35635e+06	1.82358e+06	1.83682e+06	6.61508e+06	6.1154e+06	7.98265e+06	1.14795e+06	5.81076e+06	1.10185e+06	1.53578e+06	5.71034e+06	6.3633e+06	1.76145e+06	1.30587e+06	1.80546e+06	5.30599e+06	5.33106e+06	6.88856e+06	6.10002e+06	7.23874e+06	5.2687e+06	5.50118e+06	4.63127e+06	1.94153e+06	6.36462e+06	2.86683e+06	3.71375e+06	4.68579e+06	6.76141e+06	471071	2.78452e+06	2.80299e+06	1.96619e+06	6.51322e+06	6.2717e+06	6.16587e+06	5.05997e+06	4.28915e+06	5.28746e+06	4.88236e+06	4.02745e+06	3.46478e+06	3.47473e+06	2.59939e+06	4.72558e+06	4.23081e+06	3.75478e+06
sp1018	1.46903e+06	1.88937e+06	1.33172e+06	1.14986e+06	928762	1.86122e+06	2.05018e+06	1.75695e+06	1.08547e+06	4.62978e+06	3.10439e+06	2.78783e+06	2.85276e+06	2.41915e+06	644553	574548	2.09877e+06	1.12266e+06	5.53521e+06	2.44879e+06	4.5233e+06	4.25727e+06	4.5827e+06	3.33763e+06	2.97278e+06	1.29594e+06	5.3821e+06	3.31383e+06	2.85891e+06	2.07387e+06	1.91565e+06	2.56338e+06	1.59565e+06	3.51746e+06	1.7957e+06	660136	714285	788279	362166	594265	626460	866194	418755	676770	1.25204e+06	546653	833316	532029	529716
sp102	17570.3	71022.9	21563.9	28502.4	48726.9	26333.1	68774.6	108533	53671	3042.88	344159	188141	44574.9	16659.3	60180.7	81952.5	65189.3	9675.13	43754.4	3343.06	41375.6	26897.8	37020.5	22742.1	36991	55877.6	38555.9	38338.8	97922.4	19383.9	31682.6	94944.7	26549	19736.4	64191.4	1952.85	43390.6	47856.3	45871.6	27666.1	33245.5	8468.32	30592.4	25008.4	24378.4	19694.7	16494	17658	20661.9
sp1022	745590	974418	1.34811e+06	617601	728811	841509	518342	1.04487e+06	413531	1.70365e+06	479755	1.29449e+06	1.01505e+06	1.23903e+06	583694	396324	1.15946e+06	967142	1.17618e+06	1.60702e+06	1.25141e+06	1.08428e+06	1.03306e+06	859184	685452	107972	801265	930489	620602	498457	564927	430071	267821	811944	389584	880291	1.37062e+06	1.3477e+06	1.33566e+06	915700	641662	681793	593658	950969	671852	591101	668290	429801	448506
sp1024	1.0695e+06	3.20268e+06	2.1062e+06	1.9983e+06	1.98853e+06	1.65162e+06	1.49398e+06	3.80785e+06	2.23078e+06	2.60981e+06	859098	3.43614e+06	2.07577e+06	2.36987e+06	2.59585e+06	2.30082e+06	1.85647e+06	2.1315e+06	2.33374e+06	4.06188e+06	2.7186e+06	3.12026e+06	1.99207e+06	2.15716e+06	1.27257e+06	400770	2.05547e+06	2.35818e+06	1.92916e+06	871535	1.83134e+06	1.34323e+06	822672	2.63361e+06	1.73779e+06	2.65019e+06	3.99857e+06	3.527e+06	2.4255e+06	2.11711e+06	2.71534e+06	2.91401e+06	2.09757e+06	3.39504e+06	2.01572e+06	1.99034e+06	2.33479e+06	1.88449e+06	1.28882e+06
sp1028	565702	709311	582745	149581	93751.4	726387	818543	200343	396289	233692	432750	228089	351434	419597	216751	143189	293043	92898	362332	294651	437990	422047	116660	360673	403686	373256	335175	125535	109515	121733	306524	49519.6	40676.5	122421	323755	93752.4	141070	105078	45277.2	108290	31307.9	111091	104548	129437	235996	91380.2	93670.8	91285.4	92257.7
sp1029	272610	1.33797e+06	414732	1.54454e+06	1.51381e+06	293833	305770	1.00474e+06	671893	1.31664e+06	952644	3.14753e+06	1.00436e+06	803474	1.30075e+06	2.86056e+06	970956	1.07408e+06	841848	1.34607e+06	1.50464e+06	765924	1.38326e+06	941488	1.87368e+06	255982	842449	1.62021e+06	643970	320901	506516	3.10595e+06	115874	1.51937e+06	1.8106e+06	770744	958114	751999	1.67822e+06	756163	667104	714159	873746	1.1802e+06	787056	998363	1.08078e+06	1.27362e+06	918334
sp1030	434043	483627	911708	307820	157131	420114	326145	118094	210122	393288	157356	406035	137335	272702	373447	102877	291921	877082	134654	378970	197067	282840	123771	312683	251495	157295	281510	305914	355489	426276	272502	647921	638074	237300	377485	1.17933e+06	496986	552963	1.33397e+06	931418	430919	650897	851238	747629	408140	426261	360018	1.31352e+06	1.12586e+06
sp1031	1.65347e+06	1.8348e+06	2.67442e+06	3.2377e+06	3.1159e+06	1.99766e+06	2.09112e+06	3.09037e+06	2.17104e+06	2.3596e+06	2.65042e+06	2.76089e+06	2.92075e+06	2.28904e+06	3.05683e+06	2.68434e+06	2.92189e+06	2.68558e+06	2.42841e+06	2.40943e+06	2.78866e+06	3.00593e+06	2.69942e+06	2.64554e+06	2.33834e+06	3.00185e+06	3.06613e+06	1.97197e+06	1.91928e+06	2.38954e+06	2.70542e+06	2.87016e+06	3.17932e+06	1.95322e+06	3.25758e+06	5.07587e+06	3.47996e+06	3.74833e+06	3.80425e+06	3.27257e+06	2.045e+06	2.24365e+06	1.74615e+06	3.04932e+06	2.56186e+06	1.75197e+06	1.99438e+06	2.37669e+06	2.31229e+06
sp1032	5517.93	34346	45884.4	79968.8	136779	51672.3	6188.23	75669.6	11365.4	256332	1.47574e+06	425923	227513	122275	48249.5	291559	82528.1	7212.24	6880.69	714951	300547	723627	233834	185081	215681	121723	150694	20092.3	29323.2	32286.2	90317	7925.48	13408.3	33626.8	26169.7	91759.9	45009	106795	56261.6	79959	102790	148252	81390.1	379291	902263	565751	123640	453548	61845.1
sp1039	7.34745e+06	9.15961e+06	5.2974e+06	1.11443e+07	1.10752e+07	5.53782e+06	8.4102e+06	1.0899e+07	2.57165e+07	6.80217e+06	8.31197e+06	1.09506e+06	1.80371e+07	1.73006e+07	2.08433e+07	1.04316e+07	2.69042e+06	2.1273e+06	1.03605e+07	822929	6.50863e+06	9.82537e+06	6.74373e+06	6.15782e+06	6.29518e+06	2.17208e+06	2.54068e+06	1.45048e+06	1.75558e+06	3.35837e+06	1.1643e+06	3.04107e+06	7.78187e+06	1.59989e+06	1.05202e+07	3.04596e+06	2.63378e+06	2.54925e+06	3.31601e+06	2.69427e+06	2.21459e+06	5.08471e+06	2.83618e+06	2.9501e+06	4.18789e+06	2.70933e+06	1.8529e+06	3.41388e+06	1.35035e+06
sp104	1.12248e+06	3.1147e+06	1.0899e+06	2.07484e+06	1.05342e+06	1.08107e+06	1.63179e+06	2.37036e+06	1.19464e+06	2.36645e+06	3.54841e+06	4.44046e+06	1.74613e+06	2.56804e+06	3.64247e+06	1.37883e+06	655746	1.37823e+06	1.63545e+06	832308	1.08687e+06	886054	1.06733e+06	1.17043e+06	960703	2.30517e+06	2.88813e+06	1.7425e+06	4.75134e+06	655728	722732	1.05934e+06	610613	1.50266e+06	1.0968e+06	1.51235e+06	2.22012e+06	2.37284e+06	2.27703e+06	1.79914e+06	1.91936e+06	3.28188e+06	1.77977e+06	1.57339e+06	2.39069e+06	1.12818e+06	2.44146e+06	938170	686050
sp1041	3435.29	9631.39	18386	19037.3	7764.72	15025.1	15726	11947	9994.82	42105.7	19930.7	25098.7	9150.91	57763.2	34196.3	11868.4	5858.09	9891.15	19057.9	43154.8	7190.13	103621	7986.61	14962.9	34132.4	26327.2	31251.6	26189.6	28888.8	16217.6	12881.4	14719.5	13230.5	19081.5	144045	10662.5	47621.7	15816	22530.4	27746.6	11395	15722.3	46053.1	40690.7	50665.6	38489	38750.2	17832.4	14316.8
sp1043	1.56308e+06	1.95614e+06	1.02536e+06	1.95794e+06	2.34497e+06	1.31359e+06	1.83201e+06	2.34033e+06	4.95981e+06	1.62438e+06	1.66734e+06	243400	3.21104e+06	3.37367e+06	4.90485e+06	2.20586e+06	620530	405389	1.75447e+06	176852	1.311e+06	1.94271e+06	1.18179e+06	1.33176e+06	1.38974e+06	406005	503208	301680	340378	674818	220930	626054	1.70169e+06	333991	2.16376e+06	626166	571101	577082	700570	567564	508348	489792	515402	555838	771024	562983	418337	662456	289233
sp1044	35550.3	81751.1	68041.3	72488.2	52998.3	70775.8	69763.4	39598.7	84072.8	77436.8	79845	65260	37119.6	43713.2	95348.4	67400.2	37450.6	71280.1	74090.1	68097.1	56963.5	77144.3	87223.2	29894.8	97939.7	69308.6	37587.5	80383.1	88432.7	41325.3	73227.7	94367.9	85069.5	67990.7	61812.3	47274.9	92893.4	26413	95532.6	88544.2	76797.9	98995.2	111629	79957.2	59825.7	88439.8	75528.7	50354	64732.4
sp1048	37872	23366.3	35728.4	22192.8	30356.7	26410.4	44109.8	42759.8	35437.1	26100.8	30013.4	40159	47804.5	23984.4	29224	33770.2	18042.1	49703.5	48239	20119.5	36767.3	125527	51798	69011.4	43160.6	63811.6	72477.1	30949.5	23604.1	37475.3	59554.6	43774.1	79167.6	51498.8	35047.4	31319.4	53600.4	52317.3	35557.8	38362.3	54397.3	33675.1	20712.2	60470.4	63706.3	66359.1	42767.7	43118.4	61539.2
sp105	2.63232e+06	1.28847e+07	3.68911e+06	2.77285e+06	4.56437e+06	5.05787e+06	5.57883e+06	7.60182e+06	4.43961e+06	5.12943e+06	1.29589e+07	1.7304e+07	6.25966e+06	4.53515e+06	2.10511e+07	4.3789e+06	5.0267e+06	2.03424e+06	1.33572e+06	2.9805e+06	2.58002e+06	1.14678e+06	6.57785e+06	7.4502e+06	1.22955e+07	3.54797e+06	2.20493e+06	3.92593e+06	8.14511e+06	3.74945e+06	6.58229e+06	2.55788e+06	2.06432e+06	2.65797e+06	9.41931e+06	1.87384e+06	2.40366e+06	3.74102e+06	2.47133e+06	2.23325e+06	4.54548e+06	7.35202e+06	1.92629e+06	1.38296e+06	1.82252e+06	2.35905e+06	3.90833e+06	2.83062e+06	1.3764e+06
sp1052	3.83346e+06	523238	357818	587691	447907	706954	777605	703518	827351	722254	1.13203e+06	1.3943e+06	1.0962e+06	1.23607e+06	744774	592666	416962	611260	988127	820464	733432	1.30608e+06	1.03741e+06	933322	667866	868590	1.75613e+06	1.88596e+06	2.11079e+06	319199	602120	1.45869e+06	1.39049e+06	2.1271e+06	1.3671e+06	1.82659e+06	1.37579e+06	1.86602e+06	1.21807e+06	1.38395e+06	1.35442e+06	1.88389e+06	1.86742e+06	2.7507e+06	4.84558e+06	4.63454e+06	1.49709e+06	1.06785e+06	1.08797e+06
sp1053	133072	43931.4	50175.3	39051.5	21019.4	13103.6	43899.8	47784	37889.1	55156.3	82602.7	109587	99207.3	66496.4	91672.6	70251	55889.6	71895.5	82292.4	46137	25394.8	79833.3	80813.3	57493.1	37365.7	96247	126510	168792	118637	54329	14664.4	112836	57297.2	202973	94891.1	221601	190403	127151	125869	166076	65961	214914	146080	225277	299374	303349	132984	144207	95633.3
sp1054	19760.9	6902.71	429.223	9962.89	2253.44	1936.37	6185.33	3058.22	8816.35	4738.36	19828.3	5405.31	31182.1	16679.8	7960.66	12619.8	10082.2	3472.47	7742.97	4276.99	5600.56	13677.1	7064.5	5448.85	1892.5	2986.4	104963	71078.9	12545.6	3760.8	4289.96	603.519	3691.09	59304.1	25926.1	20982.6	6652.23	11835.8	4796.09	11695.8	7338.01	30246.5	6967.37	19945.2	20718.9	5361.62	6390.14	10211.6	2827.98
sp1056	839900	215500	193790	219973	153609	206395	255295	338629	273235	119021	349044	296109	421680	405167	448372	283711	204583	415777	251031	215472	102958	377713	170214	299314	177201	383975	451838	662607	661337	161469	334207	523751	267129	593627	469262	1.22692e+06	775265	782039	765454	780788	725537	959632	867562	679235	860624	975095	1.03526e+06	437078	339947
sp1057	7.5187e+06	1.01544e+06	974593	1.22481e+06	841252	1.11559e+06	1.79417e+06	1.43859e+06	1.42052e+06	1.48261e+06	2.07653e+06	2.21021e+06	2.06849e+06	2.00988e+06	1.87916e+06	1.10031e+06	966066	1.4212e+06	1.69636e+06	1.60046e+06	1.38717e+06	1.83685e+06	2.00033e+06	1.80105e+06	1.45984e+06	1.52923e+06	3.7063e+06	5.17146e+06	4.17759e+06	923036	1.14614e+06	2.40887e+06	2.95806e+06	3.88122e+06	3.26552e+06	3.80269e+06	3.37859e+06	3.23637e+06	3.77649e+06	2.62644e+06	2.17381e+06	3.25394e+06	2.90095e+06	6.13189e+06	7.01931e+06	7.10381e+06	2.73114e+06	2.46986e+06	1.71991e+06
sp1058	4.55473e+06	1.8713e+06	1.47765e+06	1.3228e+06	1.04565e+06	2.34164e+06	2.71255e+06	1.95165e+06	1.76337e+06	2.12464e+06	3.5794e+06	4.43851e+06	4.22839e+06	3.90208e+06	2.59211e+06	2.26923e+06	2.3815e+06	2.29497e+06	2.95745e+06	2.21176e+06	1.69213e+06	3.75536e+06	2.91359e+06	3.51218e+06	2.42849e+06	3.81168e+06	6.73654e+06	7.77318e+06	6.54372e+06	2.32814e+06	2.42229e+06	4.91365e+06	3.49162e+06	7.82364e+06	5.39601e+06	8.20195e+06	6.40611e+06	6.97897e+06	6.96135e+06	7.16069e+06	5.5436e+06	7.16935e+06	5.9587e+06	1.07021e+07	1.28428e+07	1.41622e+07	5.94502e+06	4.61462e+06	4.3479e+06
sp1059	109415	138000	168127	179031	90764.2	57815.7	113972	116920	115812	103090	131855	79955.2	106413	123041	67446.1	110485	76691.3	101284	146096	103859	104507	80860.2	105480	111650	93176.5	103240	108461	113891	97610.5	76465.8	82844.2	88341.8	161126	84556.9	116862	110110	171355	146323	110912	145813	61741.2	70547.5	89725.5	96188.1	117102	105337	73758	71743.8	76254.9
sp1061	2.81811e+06	2.50635e+06	1.95463e+06	1.1367e+06	523894	2.33652e+06	2.02136e+06	830679	778961	1.22864e+06	1.40552e+06	1.48269e+06	1.00976e+06	1.08033e+06	466060	813198	1.47816e+06	1.0382e+06	685489	1.59038e+06	1.96913e+06	2.02999e+06	1.27705e+06	2.33293e+06	3.0358e+06	2.52706e+06	2.13383e+06	1.44618e+06	1.20824e+06	1.28008e+06	1.67769e+06	709442	790066	1.22394e+06	1.21655e+06	482738	459428	498429	426470	484378	1.19072e+06	676265	1.09266e+06	2.26294e+06	3.88005e+06	2.83271e+06	682213	1.10289e+06	1.12172e+06
sp1067	66147.1	98933.7	382401	679878	453130	14042.3	103589	388168	71422.1	290580	2.62954e+06	501003	1.94903e+06	1.69785e+06	76593.6	691821	179487	111614	80287.1	916512	429287	165066	615438	623747	501679	180749	473313	13171.8	336608	94974.3	34394.2	38756.9	17927.2	43901.7	99053.9	168018	130858	112616	117885	189153	207576	313869	52061.7	484687	764240	566023	267792	861756	21099.3
sp107	564986	783001	922581	1.10324e+06	953726	646925	843386	746135	1.00333e+06	1.23976e+06	1.3382e+06	894667	1.68722e+06	1.53086e+06	1.75623e+06	829109	1.40827e+06	852095	970763	744655	779468	842621	617589	1.16276e+06	1.5253e+06	705117	842018	789913	857414	456594	649471	634520	483975	719036	741307	474093	627669	899628	366623	582511	815607	817735	485068	1.27727e+06	948099	882881	508514	495306	397308
sp1070	2.22891e+07	1.58248e+07	2.48632e+07	5.78711e+06	2.95495e+06	3.20935e+07	3.49463e+07	4.1185e+06	5.58819e+06	1.13106e+07	8.63397e+06	1.14708e+07	1.185e+07	1.27955e+07	5.06246e+06	4.26079e+06	5.23211e+06	1.09495e+07	1.35733e+07	1.29821e+07	1.38405e+07	1.55568e+07	1.7724e+07	1.84808e+07	1.92745e+07	1.8493e+07	1.30644e+07	1.71629e+07	1.52959e+07	1.04204e+07	1.64101e+07	1.39993e+07	5.67856e+06	1.0001e+07	8.96417e+06	7.6139e+06	5.09434e+06	3.29397e+06	3.05322e+06	3.48951e+06	9.83766e+06	6.57963e+06	1.07304e+07	5.96041e+06	1.38493e+07	5.30191e+06	9.98709e+06	7.93378e+06	8.131e+06
sp1074	2.40452e+06	1.89143e+06	3.54351e+06	1.71355e+06	1.24862e+06	3.03405e+06	2.72186e+06	1.6025e+06	2.42142e+06	2.83352e+06	3.49908e+06	2.81144e+06	1.83429e+06	2.18834e+06	2.67039e+06	2.90521e+06	1.64596e+06	2.70143e+06	2.30454e+06	1.87828e+06	2.80091e+06	2.71139e+06	3.11816e+06	3.64418e+06	3.53076e+06	3.30012e+06	2.37044e+06	2.91736e+06	3.06862e+06	2.31318e+06	1.89442e+06	2.43258e+06	2.65818e+06	2.93019e+06	1.7138e+06	2.82269e+06	2.56792e+06	2.17292e+06	2.19912e+06	2.21004e+06	1.8025e+06	2.12159e+06	1.85584e+06	3.72884e+06	3.29542e+06	2.37211e+06	2.23017e+06	2.71848e+06	2.15464e+06
sp1079	116289	79151.6	251767	64858.4	137268	158653	148762	87211.1	63298.7	75135.4	163995	84201.9	100797	139788	19480.1	59113.3	71982.7	41240.4	65284.7	62854.9	57933.4	356496	232254	271062	174730	127492	270216	30595.4	140216	127073	196881	84927.3	110380	152548	67806.7	74867.8	113285	213068	100085	138845	125322	135584	202337	138856	208320	39370.8	166300	178289	156976
sp108	628181	1.18724e+06	861477	765326	779189	861398	1.10734e+06	1.26074e+06	798459	784733	1.80335e+06	2.02786e+06	749888	503906	2.29287e+06	686912	1.04181e+06	429798	358103	854069	841398	307724	668896	798559	1.42074e+06	676565	571407	540048	971280	416108	612693	682288	411904	6107.63	1.0707e+06	403895	539651	465620	412188	609233	474285	836453	288031	291067	372578	367827	671443	615225	327469
sp1080	327828	2.02626e+06	746054	400750	272411	170422	484004	647705	261011	297907	1.51162e+06	2.50318e+07	233423	242770	423880	2.39569e+06	501761	863258	2.33473e+06	1.3691e+06	403063	386502	466910	956976	463607	812893	697335	729456	2.26684e+06	707109	2.41083e+06	1.82692e+06	1.76761e+06	1.26537e+06	944605	4.03248e+06	2.19901e+06	2.00072e+06	1.3808e+06	1.65474e+06	2.06397e+06	2.1632e+06	2.2376e+06	1.06802e+06	1.77039e+06	1.16325e+06	3.91024e+06	2.50013e+06	1.6236e+06
sp1081	84867.6	125098	43343.7	554451	802098	2562.93	186111	677962	102854	81999.1	220285	24161.5	614770	408719	60865.1	265867	404000	40014.2	144216	22465.2	100087	256422	30635	35014.5	44298.3	22887.3	293623	139576	146547	59317.4	150214	1.23309e+06	63650.4	166785	493008	279770	283241	155516	233450	188293	225719	269315	216269	374915	433473	574776	280834	177737	174559
sp1088	1.83113e+06	161349	115479	369941	385033	186967	263122	350935	886015	83526.1	107230	93097	604747	618904	869783	375827	64285.8	234843	111305	121767	41224.5	325647	47603.9	317181	232372	78800.3	247645	533035	184880	88832.7	485439	65499.6	76303.4	553028	341462	449036	413611	382919	343583	437497	436466	457799	465295	364771	1.01091e+06	326363	280094	107833	93921.8
sp1089	172797	37826.7	35527.2	32606.1	20366.2	29081.9	10906.8	13091.6	24872.9	4428.74	5309.35	10762.5	67665.1	47185.9	31447.2	43274.2	16921.7	70862.6	3738.14	5660.66	6980.54	10254.4	8361.52	57979.5	11279.7	11311.4	42445.1	65262.7	17616.8	5642.73	65979.8	8099.64	5783.09	69115.9	14448.4	119899	83096.3	78194.3	77980.9	47727.3	53056.9	126486	104723	85584.6	102737	70046.9	122717	23287	27074.6
sp1091	393134	312062	492813	239947	153524	202204	355613	60807	117315	155172	177824	90652.7	86399.6	137112	258727	104341	184700	222266	51781.1	85547.7	84763.7	146681	70288.4	172146	86051.5	68689.8	149271	65555.2	117226	196748	124607	136918	159967	41361.6	263076	207855	144742	142420	154051	202853	95946.7	134255	208637	123306	100672	94010.5	92170.1	204224	200279
sp1092	464821	16263.1	102227	167553	145624	74024.5	113013	123024	209532	40272.9	17093.4	12680	250516	271929	388016	153548	39211.7	116451	46399.5	25727.2	34954.5	108239	16148.9	107602	65392.5	60203.6	94124.6	204020	59782.1	31602.8	226330	12229.1	17752	284915	150874	207137	58348.6	100322	126630	201569	121808	48386.9	208412	168227	373100	287903	164450	49563.2	43087.8
sp1095	124360	473200	96492.4	194143	154254	257147	234927	296196	605199	466590	718922	1.12679e+06	381547	314429	768500	302334	710711	537316	430724	223482	460973	493037	165000	125602	299084	329999	501557	983289	793981	208800	382201	1.49166e+06	81368.8	954645	1.17711e+06	238849	187132	72971.9	280142	128021	157708	330372	178583	336103	345216	305277	429702	201744	252964
sp1096	186610	160077	214740	327097	144944	108241	237833	485453	264802	248819	290562	125993	225845	327249	136408	432967	249335	237686	137612	252601	116200	72311.9	77508.3	258191	299851	182151	104668	32919	213633	155187	108227	110801	18523	54387.8	94771.9	183937	116161	131632	78062.3	150506	247143	141821	229692	803391	672206	725951	85457.5	160299	102329
sp1099	64924.9	105754	99542	140052	102224	49461.9	66526.4	164841	76868.1	95623.8	165686	208376	197954	161520	261340	80744.4	157218	153343	90152.8	123667	125200	140858	79407.5	111077	73834	129643	322080	215477	192936	93117.4	107697	284246	124850	176929	103983	159677	127206	88668.9	142390	169026	120972	186062	115276	188563	192910	250392	121625	110544	102699
sp110	483316	905787	489810	1.05973e+06	604964	306924	478974	1.56427e+06	785443	522539	1.65769e+06	2.20689e+06	1.00819e+06	853664	1.14078e+06	1.00236e+06	783153	816361	886637	668336	1.04408e+06	567746	525132	503559	865895	734624	637484	629732	813995	535763	496460	513031	438884	554350	988654	795681	690628	558634	809582	760396	877042	1.08272e+06	852154	601939	990505	928931	775806	579238	444990
sp1105	40847.2	55752.8	15154.1	29742.4	26232.8	71290.3	16850.4	4105.17	61296.1	476006	4446.09	465289	1.52155e+06	938524	4809.81	19024.6	60634.1	1925.96	2873.39	5658.32	103240	36079.2	44742.3	35629.3	85260.9	24611.6	206107	204801	235968	19925.1	68314.8	199351	33567.5	206068	70236.8	436597	396072	602745	581300	574327	367106	847072	493159	386508	538288	362132	478582	300038	316829
sp1106	1.67425e+06	106187	246812	466361	318212	304258	470356	583799	808706	406066	673045	300069	1.42512e+06	1.41349e+06	273099	615230	212733	241938	349700	154502	260604	267471	406724	176180	160229	245864	2.92243e+06	3.75514e+06	1.07721e+06	186187	77078.4	50459.4	292093	2.88889e+06	3.07408e+06	320863	356085	184764	253975	166778	296889	162759	285838	245077	399411	268394	258164	200258	252992
sp1108	164927	137785	177455	346389	272243	114284	134101	301293	281850	145892	307957	182379	268367	372336	351354	272382	304029	74377.4	111097	23484.1	77384.7	122493	129933	39532.2	93608.1	100523	126335	197878	125325	117698	101868	117133	107910	140756	178487	344492	242082	258502	242934	209541	223368	221311	235472	201768	166623	90190.7	200591	167980	148776
sp1110	848679	1.95217e+06	1.3516e+06	2.03336e+06	1.53725e+06	1.50928e+06	1.81664e+06	1.4323e+06	2.07697e+06	721879	1.38752e+06	1.4378e+06	918471	1.58462e+06	2.04159e+06	3.38332e+06	1.55146e+06	1.81736e+06	999944	2.76532e+06	907329	1.36957e+06	1.32541e+06	2.20076e+06	1.43565e+06	774666	1.16668e+06	1.84837e+06	1.42004e+06	741660	1.10028e+06	1.56993e+06	949663	1.44614e+06	908486	1.81202e+06	1.83672e+06	1.50689e+06	1.24114e+06	1.34501e+06	2.01976e+06	1.84614e+06	1.72471e+06	2.87912e+06	2.1153e+06	2.47424e+06	1.59223e+06	1.92127e+06	1.50977e+06
sp1112	1.00277e+06	765963	1.17116e+06	1.39621e+06	788176	687996	920052	394807	555195	1.23903e+06	670532	551239	1.14892e+06	1.16276e+06	250539	452535	897050	945862	907787	734167	1.19761e+06	817713	1.23809e+06	888285	488367	929936	640666	731495	766067	1.19473e+06	944177	833619	1.51175e+06	866682	819207	516462	464285	474995	616452	585912	560904	573471	621143	341038	366108	437100	692877	389284	494587
sp1114	1.10266e+06	1.20135e+06	1.24787e+06	631497	422669	848180	1.53319e+06	551759	323504	1.66474e+06	272579	400325	749610	634766	263948	154107	1.18686e+06	1.2636e+06	1.55785e+06	2.2569e+06	1.98523e+06	1.84984e+06	1.10411e+06	1.88422e+06	1.6114e+06	1.52974e+06	312639	1.42131e+06	448876	750130	1.92992e+06	167027	1.842e+06	1.6344e+06	911803	209706	387621	192343	278991	315236	315129	207532	277547	1.00719e+06	679522	872758	141131	342073	441415
sp1115	1.32134e+06	2.75818e+06	2.37156e+06	987874	592503	268132	975852	859596	1.59101e+06	504356	1.85715e+06	1.01823e+07	1.15876e+06	953335	704822	4.52214e+06	1.17344e+06	2.11869e+06	3.00446e+06	1.68529e+06	521743	1.37182e+06	1.0594e+06	2.76354e+06	1.85129e+06	1.51424e+06	1.0332e+06	780125	1.44494e+06	1.35044e+06	4.81354e+06	1.86256e+06	1.78735e+06	1.15749e+06	1.39124e+06	4.1329e+06	4.04559e+06	3.44695e+06	3.29034e+06	2.56459e+06	3.2016e+06	3.30514e+06	3.81457e+06	1.97109e+06	3.56225e+06	2.31051e+06	5.61062e+06	2.96757e+06	2.23372e+06
sp1116	2.22106e+06	5.5249e+06	4.49541e+06	1.66768e+06	705672	7.01412e+06	2.18565e+06	1.129e+06	2.80533e+06	882555	4.34619e+06	1.92862e+07	2.57659e+06	2.26083e+06	1.24455e+06	7.5942e+06	1.17719e+06	5.86953e+06	4.00321e+06	3.72301e+06	803675	2.56166e+06	1.93617e+06	3.63718e+06	2.75636e+06	2.55238e+06	2.08066e+06	1.75214e+06	3.42792e+06	2.65705e+06	9.88344e+06	4.06426e+06	3.12045e+06	2.4828e+06	1.92059e+06	1.15088e+07	8.13627e+06	7.90804e+06	7.89291e+06	5.14678e+06	6.39101e+06	6.60168e+06	7.96491e+06	4.54962e+06	7.90095e+06	4.51396e+06	1.10374e+07	5.48384e+06	4.85133e+06
sp1117	3.4982e+06	3.04833e+06	3.82426e+06	8.41698e+06	5.81348e+06	5.28514e+06	1.15807e+06	3.11834e+06	4.68242e+06	572167	3.66458e+06	1.99928e+07	1.62222e+06	3.5641e+06	4.00534e+06	9.74796e+06	2.67985e+06	1.61278e+06	2.89223e+06	2.50619e+06	1.26241e+06	6.09058e+06	2.51316e+06	2.7528e+06	1.77461e+06	1.43273e+06	167297	2.01288e+06	2.89963e+06	1.7483e+06	1.63395e+07	3.9933e+06	5.71579e+06	1.99502e+06	5.29414e+06	9.32834e+06	5.58335e+06	7.18904e+06	7.83088e+06	5.56504e+06	5.10801e+06	8.24189e+06	7.75919e+06	4.55317e+06	6.76995e+06	4.04215e+06	9.54976e+06	4.82541e+06	4.94469e+06
sp1118	826059	1.16652e+06	1.00589e+06	904019	574325	360911	1.15476e+06	1.00871e+06	655207	1.79225e+06	419491	321387	730772	664648	668666	142182	830147	603368	1.3238e+06	443114	398974	621417	475889	422217	1.4732e+06	1.02781e+06	330839	212385	527461	242061	679530	145964	117280	173103	445362	270010	226745	214826	349299	209732	370698	267115	437167	182337	89691.1	60482.9	303351	214291	283750
sp112	77073.9	57743	68146	188232	194168	164537	143000	242541	323389	138690	227956	204289	160432	154748	176206	246986	127525	100683	99665	61292.3	103147	125305	49508	108222	67160.2	158742	116929	135383	152789	180187	129862	141581	125035	161061	154795	76679.7	103111	138137	66698.6	102251	108402	62139.9	37298.3	112313	88570.4	156373	102368	63325	64413.7
sp1123	2.36696e+06	2.83233e+06	2.17314e+06	2.59055e+06	3.19855e+06	1.48547e+06	3.05848e+06	3.21173e+06	2.71935e+06	2.2169e+06	4.54753e+06	1.7195e+06	5.48823e+06	2.92599e+06	3.0038e+06	2.3084e+06	3.09328e+06	3.25617e+06	2.59296e+06	3.09961e+06	4.18307e+06	5.82729e+06	3.69664e+06	2.66165e+06	2.15411e+06	3.54233e+06	5.61608e+06	2.48786e+06	2.72672e+06	2.37176e+06	6.27794e+06	5.29068e+06	3.49959e+06	3.33015e+06	3.07379e+06	2.49215e+06	3.14321e+06	3.69127e+06	2.2305e+06	1.74834e+06	3.32122e+06	2.4461e+06	2.59279e+06	3.03071e+06	3.86039e+06	2.44343e+06	2.91594e+06	3.97915e+06	3.09181e+06
sp1124	5581.59	1677.04	3257.73	13935.7	13170.1	4827.33	197075	58438.2	1400.24	7438.31	28061	2665	74458.5	54926.4	4352.73	24669.3	12955.9	17393.2	17246.6	8394.8	6707	23700.1	2729.54	4340.77	10199.5	29502.9	20583.4	11064.1	3562.37	9372.31	50302.7	3650.95	1474.61	4893.92	134609	2716.27	1551.19	6204.58	1787.24	1709.78	4541.33	9189.34	3206.3	1390.39	9009.51	1499.12	7419.94	2579.73	1724.44
sp1125	1.14425e+07	2.82034e+07	1.3072e+07	181323	173868	1.94738e+07	4.20232e+07	462661	18226.2	2.14662e+07	51560.6	6382.05	80291.4	102413	15625.6	17873.3	80735.7	5447.77	5.74915e+07	4297.11	2.64176e+07	9.42856e+06	3.84362e+07	1.14964e+07	1.57631e+07	7254.69	6645.93	3478.19	74889.9	5486.06	3417.01	6163.08	8.77134e+06	3828.02	828560	449.163	8169.04	827.336	6248.31	3631.64	4004.03	329.377	2340.36	6722	4344.01	947.016	4991.27	10718.1	4925.43
sp1126	12136.1	6537.21	12585.2	88462.6	98931.4	14317.8	19768.9	345558	1.03674e+06	8375.28	275714	12318.8	297105	440467	427418	62800.6	26867.2	19567.3	5112.68	9070.46	2229.67	16335	4798.59	4711.08	2412.12	21004.4	12521.6	5928.81	2681.06	5001.35	6386.95	2762.99	2557.91	4474.47	354830	17662.8	3788.27	6619.32	8628.61	3407.55	11657.7	10960.8	7303.2	8714.77	2078.84	2050.22	7790.28	2430.87	884.099
sp1127	4277.88	16778.3	10033	144237	236217	5493.02	16353.6	378475	787528	17397	271551	7778.54	247324	491021	537014	242974	9390.43	10121.8	14194.2	2241.1	12725.8	20098.8	2786.05	13545.2	3131.96	19147.2	9743.3	10178.4	5375.54	7970.56	3109.33	5755.93	19807.1	2444.84	265272	8713.29	6206.84	6484.53	2239.15	1909.35	10313.3	2175.47	3840.49	7727.6	1650.8	1893.91	1296.86	5126.32	5345.98
sp113	559480	983887	210471	1.21381e+06	761532	311638	462678	1.89271e+06	816203	535309	1.92813e+06	2.44721e+06	1.22406e+06	982352	1.34974e+06	697683	944253	948670	1.06851e+06	878191	1.19897e+06	586482	725479	523717	1.08052e+06	747979	715827	710836	891579	529449	564669	685224	498609	623506	1.11972e+06	913880	627511	675585	912410	955995	1.09279e+06	1.35796e+06	860798	742304	1.1314e+06	979829	898121	704469	577665
sp1130	1.79904e+06	2.16899e+06	1.5706e+06	2.7384e+06	2.2117e+06	2.16934e+06	3.77459e+06	3.76591e+06	2.75085e+06	1.7484e+06	1.41684e+07	1.47276e+07	3.88542e+06	3.66086e+06	3.818e+06	3.29006e+06	3.1091e+06	2.19652e+06	2.255e+06	2.89943e+06	2.43564e+06	1.27629e+06	2.36984e+06	5.47607e+06	9.59792e+06	2.0805e+06	2.49243e+06	1.89352e+06	3.171e+06	1.25394e+06	1.40622e+06	2.41328e+06	1.2473e+06	1.89383e+06	1.58675e+06	2.26028e+06	3.248e+06	3.51071e+06	1.8572e+06	4.37398e+06	3.30874e+06	7.49253e+06	1.93389e+06	4.14028e+06	5.9483e+06	3.91816e+06	5.09631e+06	4.90411e+06	1.32644e+06
sp1136	177593	54683.5	210701	197868	87410	16966.2	215388	335582	43438.8	39265.3	274895	15841.6	522247	751001	61349.4	338321	38081	180718	73257.4	66456.3	18769.9	139662	20436.5	50426.8	84138.6	124890	88405.3	122322	36939.4	42465.5	281346	8054.66	10893.7	151067	1.85821e+06	44394.4	22547.7	59329.2	41555.2	22643.8	28595.8	19409.8	59883	15715.8	59986.8	35142.4	57255.6	26611.1	51487.7
sp114	55223.8	60969.3	85662.3	63723.9	97772.3	34675.3	38651.7	113386	61406.9	126861	152758	182903	155469	212169	75569.1	146754	89692.7	97618	57722.4	28301.8	54361.6	47526.3	62871.8	34005.9	21179	59571.8	98837.5	87074.1	83007.5	39881.9	52079.9	43136.7	41123.5	74160.6	105126	131189	162420	184885	118107	117529	76284	114279	98008.7	160419	147897	207725	92851.5	77117.8	54660
sp1141	527599	586338	802308	2.21727e+06	697733	596199	1.07926e+06	2.09623e+06	1.41249e+06	886159	1.82897e+06	540552	1.15258e+06	1.14543e+06	959455	3.57067e+06	1.17604e+06	1.22298e+06	761529	756961	638983	466668	303359	1.57601e+06	1.71181e+06	1.26742e+06	423768	229738	968157	685567	427131	655325	123960	154982	363698	832887	745885	754405	597264	523455	1.00628e+06	924802	853730	4.23011e+06	4.49803e+06	5.38208e+06	209776	776753	448781
sp1143	194412	159817	108063	368969	245890	193301	216691	139741	455005	128736	464697	282927	152894	120721	619231	590755	1.1007e+06	130772	226365	105680	154562	254009	151836	246951	349795	196588	218146	553548	286384	167004	228811	486070	308096	518962	370024	285801	275614	251422	223582	246491	398419	263533	330764	658906	575817	622527	455245	427830	472865
sp1144	563453	620213	533470	891739	559107	569736	450208	529483	532745	926874	1.12861e+06	681405	1.03167e+06	981503	549321	561171	674801	452182	337482	584551	587887	457339	508892	468012	532940	622251	974351	735427	747133	472135	527579	632248	482281	858437	535820	96020.8	585777	449898	504131	787182	441025	629677	280483	772806	1.2714e+06	886797	598483	408188	533043
sp1146	230205	215076	280043	1.20424e+06	212752	217062	236993	213269	494328	156542	322700	504112	234168	151927	607675	536687	1.04691e+06	186558	243266	516362	163660	237407	138405	274584	239538	142224	358015	507032	203801	163626	232752	273045	186868	426919	301816	532159	412235	404964	222442	241165	577802	265501	263708	477824	658537	580631	292825	562273	435165
sp1148	715039	1.46585e+06	1.20562e+06	1.4286e+06	1.09249e+06	1.33567e+06	971979	1.9048e+06	2.40424e+06	969836	1.12612e+06	1.86253e+06	816443	843164	2.79784e+06	2.18346e+06	2.87008e+06	1.5016e+06	902514	5.00035e+06	1.0146e+06	1.51615e+06	818164	1.44329e+06	815501	166180	1.31743e+06	2.3882e+06	895847	717206	968110	1.73466e+06	491703	1.9755e+06	799761	1.76266e+06	2.26079e+06	1.55187e+06	1.25947e+06	1.01831e+06	1.86128e+06	862120	1.24403e+06	4.78134e+06	2.36981e+06	2.48038e+06	1.30999e+06	1.95194e+06	1.35129e+06
sp115	322674	241689	232140	1.03077e+06	1.09935e+06	262505	218013	1.14403e+06	1.41358e+06	214883	534416	11066	547491	754258	962074	1.23042e+06	363748	7003.28	83704.6	100	117446	154439	116033	78670.2	118100	4794.21	14825.7	7127.48	24762.5	7507.43	10698.9	14660	377505	18983.3	623126	3151.07	2772.54	5613.08	7003.53	14268.4	21671.2	9707.1	4756.4	26297.1	11324.2	25957.3	8643.13	5243.57	8888.65
sp1157	5.49862e+06	2.77672e+06	4.42893e+06	2.87566e+07	2.13115e+07	3.97962e+06	5.71939e+06	1.74155e+07	1.39343e+07	797549	8.59195e+06	3.88759e+06	1.52482e+06	1.8005e+06	8.66218e+06	7.67207e+06	1.23221e+07	1.47224e+06	7.40185e+06	2.18903e+06	4.58078e+06	5.45054e+06	6.29024e+06	3.56945e+06	3.26593e+06	1.81301e+06	8.12857e+06	7.69513e+06	341425	2.71634e+06	3.95676e+06	2.80705e+07	3.03784e+06	1.245e+07	1.65054e+07	3.52762e+07	3.1373e+07	1.90992e+07	2.90561e+07	2.04409e+07	2.94634e+07	3.56169e+07	2.85015e+07	2.15076e+07	2.74177e+07	3.7001e+07	2.81642e+07	1.71516e+07	1.85765e+07
sp1158	7.79669e+06	1.18177e+07	7.81325e+06	1.001e+07	1.04739e+07	7.56293e+06	5.66318e+06	9.19644e+06	1.1423e+07	1.73629e+07	1.42548e+07	9.98818e+06	1.3175e+07	7.40259e+06	4.68984e+06	6.41134e+06	9.7471e+06	5.54058e+06	6.36185e+06	5.73578e+06	8.21502e+06	7.56492e+06	7.91805e+06	6.24018e+06	5.39029e+06	1.1919e+07	9.20931e+06	8.90069e+06	7.80876e+06	7.69713e+06	5.59543e+06	7.73884e+06	6.37063e+06	8.69296e+06	1.173e+07	3.9812e+06	4.9592e+06	6.24508e+06	5.91162e+06	4.17889e+06	5.25593e+06	5.94531e+06	4.72822e+06	7.51114e+06	7.39043e+06	6.3671e+06	6.4782e+06	4.90142e+06	4.43703e+06
sp1159	753754	695910	719710	1.57315e+06	686336	662842	972263	1.63012e+06	1.18565e+06	821249	1.52537e+06	625499	1.00911e+06	1.4072e+06	1.14588e+06	2.65427e+06	1.11722e+06	1.08113e+06	905296	1.00346e+06	701799	608181	477768	1.28909e+06	1.60324e+06	1.14873e+06	432318	252057	1.09319e+06	699706	682634	679289	309712	230047	757427	915991	841196	862109	686061	692788	1.34474e+06	898191	995201	3.10824e+06	3.24455e+06	3.42285e+06	380904	961768	782485
sp1160	13076.3	133777	174312	142259	238631	18221.6	49777.9	106949	125448	43380.3	9.17675e+06	102908	467624	388816	38373.3	128158	128470	37992.2	31004.1	219468	184619	149186	191995	201028	64382.6	258439	77547	24458.7	129193	26835.1	358441	106422	8174.93	22414.1	130487	43802	26610	78390.4	73296.1	88175.4	77422.5	105772	22081.6	168134	264384	60825.7	69363.9	112856	37692.7
sp1162	136522	107034	7433.66	177118	171949	100	202642	100	140667	412734	8556.1	343948	394082	346824	192270	163747	100	326754	9427.77	488195	100	295952	218110	446238	39720	41267.9	289579	100	166756	233815	316058	7859.72	121573	201266	156079	325409	354562	671891	460821	270499	100	518902	259525	305121	184398	100	390490	98021.9	202510
sp1163	2.00537e+06	9458.07	759.383	1.35704e+06	940555	1.27165e+06	2151.86	4324.16	5054.94	409622	815749	886019	1.42145e+06	1.33391e+06	2.62003e+06	8840.25	15119.7	1.27207e+06	100	815844	7827.33	9390.04	5004.69	2868.43	100	105153	41717.4	6491.56	22568.3	963652	8737.38	1.72526e+06	2026.04	14262.2	2150.89	10730.3	10796.3	8000.92	16024	3739.43	7923.22	1447.61	2769.46	15058.5	2880.88	5052.84	5052.44	5007.38	2867.86
sp1170	306909	107793	137908	23538.8	49189.3	250701	170856	160822	144928	115329	126356	158129	304117	283126	102864	18197.2	50583.8	690058	124834	244145	65473.8	221228	271946	184914	132152	287278	113659	126595	352781	215722	319102	604190	12063.6	167516	439631	49197.2	40372.1	67071.6	96253.4	48462.1	64975.7	189316	167472	378282	167906	435066	79501.9	92434	100423
sp1172	10136.8	19976.7	7404.09	16803.7	33314.4	47255.5	35198.2	70843.5	32849	1136.86	18758.2	304707	21911.7	30431.8	4738.66	65674.2	54091.2	62414.6	79201.1	32500.3	12845.7	51607.7	49605	39493.4	14235.2	35381.4	29652.9	29635.8	52628.2	12860.4	131691	81420	39421.3	22690.2	76811.2	43520	75181.1	51383.5	50475.1	67152.7	91356.6	87209.8	143472	72290	81339.6	67261.1	64749.9	29037.2	44255.5
sp1175	369435	493172	850800	273965	254208	343467	731603	260464	65215.1	298174	193793	63130.8	173186	288667	149564	110878	277152	553302	617908	358910	397454	527189	274165	445952	343432	435652	116294	134310	296689	314090	576293	281601	147972	110118	242391	107251	140787	124438	99720.5	70354.2	116206	99638.2	125301	114520	213781	100159	94956.4	140347	110758
sp1178	11594.8	95212.1	18129.8	343004	291880	48934.4	102355	346821	156218	10867.3	615107	38497.7	1.11452e+06	1.05177e+06	5388	133704	1.13924e+06	191602	394969	134062	139199	280001	182065	270198	117183	185822	423651	375076	78760.8	242768	251263	2.34594e+06	177568	592908	932377	1.10316e+06	1.38422e+06	792776	848702	935760	1.00497e+06	1.02072e+06	726384	1.14147e+06	1.06743e+06	1.56368e+06	1.45089e+06	1.16503e+06	1.4766e+06
sp118	1.79654e+07	1.26176e+07	1.76894e+07	2.06645e+07	1.23356e+07	1.4702e+07	1.39521e+07	8.31534e+06	1.06645e+07	1.89712e+07	3.04083e+07	3.20998e+07	2.09669e+07	2.03254e+07	2.04486e+07	2.4917e+07	1.8968e+07	2.30036e+07	1.08574e+07	2.15963e+07	1.95498e+07	1.36025e+07	1.34701e+07	2.51262e+07	3.45536e+07	1.44655e+07	1.81359e+07	1.41187e+07	2.31567e+07	1.63796e+07	9.1771e+06	1.30274e+07	2.12881e+07	1.00274e+07	9.37856e+06	1.45654e+07	2.1019e+07	1.99457e+07	2.69261e+07	2.67398e+07	2.75556e+07	2.62147e+07	2.76633e+07	3.12123e+07	5.63032e+07	7.11068e+07	2.72096e+07	4.64588e+07	2.32677e+07
sp1189	48519.3	86095.1	68661.7	20134.3	64563.1	94528.7	92168.3	184785	17085.5	64582.7	150322	242502	81643	185356	48703.9	121071	61510.4	180801	109886	73638.2	77582.1	79540.2	91323.1	150065	111142	83075.1	266597	110382	165331	135733	143964	162163	128226	144687	150166	137957	183561	171984	131093	125596	333331	172127	84212.6	165685	202460	230972	98061.6	137102	179107
sp119	213608	308935	303162	293328	407815	352595	420545	501953	675434	543015	661541	1.06789e+06	432633	530550	588807	2.90565e+06	378078	600051	284465	385728	139893	303853	200252	194809	175744	1.35797e+06	654700	523482	1.12521e+06	273503	524554	1.49123e+06	366543	797330	545591	507745	1.07485e+06	784853	617523	605259	989960	1.12611e+06	415179	1.20143e+06	594427	1.1582e+06	1.27491e+06	514891	297304
sp1195	25054.9	55272	24824.9	18079.6	19163.6	28757	19834.2	52009.5	55387.2	13245.6	129753	97060.3	54177.8	42810.7	8659.86	136537	58504.2	49233.3	95657.9	36251.8	30351.6	126543	16300	62420.5	28659.7	48134.6	89726.9	413578	83284.3	28573.5	164697	423662	34246.6	325802	144273	385975	587546	470982	269710	469178	623033	622398	605597	718675	615410	806922	518999	270512	324640
sp1200	1.64954e+06	1.41105e+06	796988	555611	570501	1.70699e+06	2.02888e+06	1.32571e+06	1.26591e+06	646528	1.18688e+06	328822	2.10751e+06	2.67054e+06	638715	115263	122866	2.93044e+06	719335	1.04272e+06	510420	1.7605e+06	2.18718e+06	947558	806688	703817	629094	1.44161e+06	3.79579e+06	1.31553e+06	1.92677e+06	1.03579e+07	321771	1.24121e+06	6.44734e+06	323797	161740	230257	247470	132082	113778	516185	309634	1.02921e+06	306054	1.44166e+06	172545	86644.5	205291
sp1202	1.58494e+06	1.40779e+06	1.3029e+06	761824	906662	1.44397e+06	1.73596e+06	1.39599e+06	1.59006e+06	837405	1.33662e+06	668712	1.53618e+06	1.93438e+06	993958	426761	379687	2.27452e+06	1.02014e+06	1.17685e+06	802184	1.23831e+06	1.64292e+06	1.13351e+06	1.2764e+06	828518	890005	1.22894e+06	2.14722e+06	1.34199e+06	1.75502e+06	4.20809e+06	504294	1.48854e+06	3.14918e+06	800811	494638	551911	569622	368767	436952	739226	701562	1.39345e+06	703467	1.36862e+06	588669	343650	621682
sp1204	253894	231463	150008	109121	77977.9	176349	126896	48164.5	58038.4	139514	123108	156121	83863.1	103519	33950.9	58007.4	163719	93650	88353.1	111559	178149	129422	123793	139719	196776	236478	219061	196557	165654	139648	162164	108599	75876.8	138741	110167	31433	50147.2	51964.9	40893.8	67460.5	97111.8	48687.9	58435.8	96452.6	182398	139301	55688.9	60395.5	104612
sp1205	5.15323e+06	8.17518e+06	7.26927e+06	8.02249e+06	7.08213e+06	5.38011e+06	4.67045e+06	7.06849e+06	6.28115e+06	6.823e+06	7.99261e+06	7.12516e+06	6.65159e+06	6.60233e+06	8.09701e+06	6.76352e+06	6.93757e+06	5.90186e+06	5.75752e+06	5.70316e+06	5.97663e+06	7.24407e+06	7.33946e+06	6.72794e+06	6.5104e+06	8.16816e+06	6.46783e+06	4.56638e+06	4.67852e+06	6.03441e+06	6.66374e+06	6.24901e+06	8.00212e+06	6.5593e+06	7.16274e+06	1.1824e+07	9.70744e+06	9.7728e+06	1.05877e+07	8.93304e+06	6.41532e+06	8.56716e+06	5.10969e+06	9.63278e+06	8.23329e+06	5.96772e+06	5.50986e+06	6.81799e+06	6.93009e+06
sp1208	409659	365237	426519	307994	322753	548430	486117	259244	1.06636e+06	544334	730760	1.71572e+06	701999	894268	347849	813175	598003	369306	375945	364098	231901	229949	358204	317437	445639	462668	785352	990837	698228	131224	241786	794237	142722	714519	279733	395086	476136	486292	307396	299833	436671	475580	550674	261909	489425	98566.7	491700	276601	376070
sp1209	231951	275043	182849	176566	73503.8	141206	352471	180369	298657	210181	419487	478249	235011	252636	250620	230182	274543	153491	374542	257491	242414	343564	395964	377286	351841	229332	429778	268790	128232	155087	259223	149825	7827.5	223952	156499	188186	237762	288944	105311	213788	156844	257369	194643	159005	157842	7082.37	159239	107185	129915
sp121	26101.2	75274.1	57081.8	89083.2	63756.7	42917	149161	72115.5	62090	42316.5	87911.2	82516	73995.2	93100.3	37646.3	56334.2	74966.7	80297.3	119286	66519.3	134335	55628.9	109069	101787	105497	48773.6	188495	93466.3	127809	62174.3	53250.3	105200	227895	93375.1	53565.3	38282.8	56507.6	47794.8	53157.2	73297.9	56072.7	74338.9	59090.5	211495	202133	171839	60681.8	105880	80894.4
sp1212	196139	1.01376e+06	556289	280147	204273	89378.3	189456	221661	219811	309469	76447.3	30885	346120	203610	24335	108713	682940	411889	206009	146585	260827	296891	302644	125888	186010	289846	179739	104757	247705	288581	609581	145379	292810	97409.9	444522	93347.4	100782	71831.2	155840	89176.3	163242	88243	302142	307578	367805	377903	332858	290451	286939
sp1215	13428	948.619	1196.74	748.835	14256	1131.48	57072.2	7800.28	1038.47	33426.3	13217	3656.59	9269.53	10746.3	2528.41	738.846	7115.42	4009.7	567.797	8198.69	1670.75	29010.1	1764.04	1707.3	2734.49	3111.84	1573.65	154806	79981.6	13016.1	2228.1	3625.27	1951.96	47114.9	12234	11632.7	2637.66	7753.77	307.014	3599.63	4250.26	129002	11551.7	7171.45	4412.81	25878.5	4719	4558.21	2965.43
sp1216	50084.7	13707.8	13274.4	16268.1	85239.4	11002	552413	36802	14069.6	73675.8	2472.6	77570.8	32025.1	24862.9	3582.94	6773.91	65661.6	25272	27667.3	4676.27	19899.1	1.00342e+06	9340.7	846.144	10340.3	16447.9	14800.4	140000	51658.7	57172.1	507.889	4354.92	37006.9	33747.5	32223.2	24789.5	2637.48	21123.7	18395.5	13916.1	39869.9	207054	647.875	36590.9	3176.56	145930	35386.3	2803.36	8714.79
sp1217	58884.1	20441.7	4321.99	10189	49506.9	17036.9	697498	55477.9	7887.96	110263	23639.4	30580	29389.3	38673	10162.8	24312.3	75132.1	2104.55	32765.2	43676	6907.5	1.43407e+06	2561.93	9046.02	8551.35	7721.58	13147.1	254291	116934	49101.8	11316.4	14808.2	45516.5	177096	11539.3	33553.2	6855.1	16477.6	15088.2	4691.59	32447.7	155444	7068.57	34361.6	11483.7	165143	38544.5	7823.16	8138.69
sp1219	53345.5	5520.55	5001.64	19339.2	50764.7	6849.11	471207	19431.7	9392.25	72332.1	32405.6	51528.2	35489.9	16522.1	7538.02	8858.33	85530.9	15504.8	62446.3	30221.4	11386.5	1.12593e+06	11475.1	5506.17	13147.2	4178.77	14892.9	148622	57862.7	47866.6	3297.49	7034.49	35040.9	38448.9	26538.3	45781.3	4818.27	8698.58	4336.3	19869.1	53530.4	128952	5277.86	27350.6	19845.9	153193	14605.4	9295.82	3455.18
sp122	54959.1	47341.1	23036.1	99101.4	76318.2	39691.7	136575	41667.5	100117	73068.2	107285	173821	65021.2	62107.4	67623.7	104940	92142.2	51174.7	35871.2	132795	192595	75120.1	124007	91566.3	92440.7	54024	264743	81580.9	123126	80305.1	106851	91033	40948.2	109484	73016.3	45005.9	84720	51432.3	59571.7	70987	91423.9	156573	31079.3	155150	173648	184907	76994.7	111023	36917.7
sp1224	1.05581e+07	1.5319e+06	9.67941e+06	361370	253356	1.22842e+07	8.75319e+06	6.30993e+06	1.07357e+06	4.97407e+06	1.43443e+06	584137	4.26058e+06	7.05034e+06	1.52126e+06	92510.9	1.30425e+06	1.23655e+07	1.53022e+06	8.38457e+06	2.417e+06	6.51658e+06	6.96079e+06	5.62034e+06	3.39974e+06	7.15063e+06	7.14471e+06	3.43615e+06	1.08613e+07	1.51075e+07	3.01814e+07	1.79623e+07	2.24147e+06	3.4566e+06	1.8311e+07	5.45775e+06	2.45879e+06	3.62757e+06	3.95367e+06	1.35621e+06	2.16026e+06	7.67284e+06	3.62335e+06	8.33407e+06	4.06464e+06	7.04064e+06	3.65432e+06	1.99953e+06	4.59423e+06
sp1225	2.8996e+06	1.88356e+06	3.84862e+06	1.49371e+06	867313	2.56968e+06	2.75795e+06	1.24619e+06	2.119e+06	1.01501e+06	2.0606e+06	2.29166e+06	1.70299e+06	2.22574e+06	2.42882e+06	4.12015e+06	2.01798e+06	1.66537e+06	2.5675e+06	1.58747e+06	1.6939e+06	2.17247e+06	1.87018e+06	2.64901e+06	1.48254e+06	2.28701e+06	2.27161e+06	2.58112e+06	1.92703e+06	1.14776e+06	1.33898e+06	2.36806e+06	814827	2.02892e+06	1.24682e+06	2.38245e+06	2.25441e+06	2.44353e+06	1.02455e+06	1.90794e+06	2.36269e+06	2.18322e+06	2.39695e+06	1.11483e+06	1.89088e+06	400398	2.09904e+06	1.53543e+06	1.74623e+06
sp1226	86010.6	56485.9	35173.9	212123	206298	68968.9	164566	270546	176948	101530	638879	316164	506974	422208	44957.5	316424	243669	214121	644770	146159	247092	548913	168131	204898	135882	166202	449688	1.02312e+06	148036	242979	311422	781239	146501	1.23232e+06	608310	1.48654e+06	1.73396e+06	1.35276e+06	1.27944e+06	1.61188e+06	2.31905e+06	1.74269e+06	2.10295e+06	4.04297e+06	3.955e+06	6.22243e+06	1.48254e+06	1.50747e+06	1.28034e+06
sp1227	1.78356e+06	1.23345e+06	2.2223e+06	984634	674024	1.44898e+06	1.76721e+06	833112	1.18812e+06	633551	1.29726e+06	1.53365e+06	1.14338e+06	1.33114e+06	1.57506e+06	2.68274e+06	1.25303e+06	1.15091e+06	1.6009e+06	947727	1.03527e+06	1.44555e+06	1.29102e+06	1.64189e+06	889600	1.5388e+06	1.54011e+06	1.9258e+06	1.13952e+06	671926	947664	1.72604e+06	561190	1.37535e+06	976735	1.51444e+06	1.53051e+06	1.68699e+06	708555	1.06771e+06	1.46146e+06	1.58962e+06	1.80455e+06	712803	1.22146e+06	322685	1.38013e+06	995232	1.13958e+06
sp123	2.60548e+07	2.95585e+07	2.6054e+07	2.63685e+07	2.53276e+07	3.28059e+07	3.2043e+07	2.56759e+07	3.09136e+07	3.20551e+07	2.86883e+07	2.55368e+07	3.24333e+07	3.26448e+07	2.60431e+07	3.0438e+07	2.67726e+07	3.25586e+07	2.8611e+07	3.47024e+07	3.06068e+07	2.58127e+07	3.26264e+07	2.69484e+07	3.25742e+07	2.82212e+07	2.59311e+07	3.49734e+07	3.48655e+07	2.88763e+07	2.72324e+07	2.89835e+07	3.41958e+07	2.83026e+07	2.74878e+07	2.37329e+07	3.23294e+07	3.19779e+07	3.09854e+07	3.30878e+07	2.73838e+07	2.57408e+07	2.86539e+07	3.09277e+07	2.87297e+07	2.86015e+07	2.69405e+07	2.81963e+07	3.12212e+07
sp1231	848415	450007	859594	199995	174916	1.10015e+06	892863	701647	288354	555218	329313	288761	588402	793390	483131	64702.3	353414	1.10216e+06	460303	731427	446474	741063	811031	709065	644180	972857	771726	596487	978234	1.03105e+06	1.63166e+06	1.55874e+06	476061	625775	1.50692e+06	690035	463137	544098	692799	333210	425986	858883	547473	969929	711450	833931	596219	412947	588955
sp1233	966779	1.83564e+06	2.4151e+06	2.53405e+06	1.3699e+06	480304	1.0807e+06	1.56316e+06	1.05658e+06	1.41036e+06	2.08904e+06	295455	1.75611e+06	1.82242e+06	1.01071e+06	661603	2.45646e+06	1.50038e+06	700760	584470	916260	1.71768e+06	926882	1.13616e+06	754146	829691	526944	778099	964924	906474	1.60057e+06	931819	1.10476e+06	866166	2.48113e+06	670058	613087	542227	614597	485023	686489	886122	1.08907e+06	1.30118e+06	1.40039e+06	1.00213e+06	1.49805e+06	1.48507e+06	1.90282e+06
sp124	2.00116e+07	2.74886e+07	2.0171e+07	1.47059e+07	1.80991e+07	2.91273e+07	2.59352e+07	2.81131e+07	3.14704e+07	2.47676e+07	5.46757e+07	3.11719e+07	4.32677e+07	5.44708e+07	2.52304e+07	1.39332e+07	4.33101e+07	3.03795e+07	5.63442e+07	1.72849e+07	4.58104e+07	6.91761e+07	4.76696e+07	4.00347e+07	3.66853e+07	3.49749e+07	3.84687e+07	2.1378e+07	3.03776e+07	2.75213e+07	4.25085e+07	1.68374e+07	2.50824e+07	2.18358e+07	3.39003e+07	2.67716e+07	2.61963e+07	3.21801e+07	1.6981e+07	2.0645e+07	1.83187e+07	2.87733e+07	1.55367e+07	2.60269e+07	2.89698e+07	2.18532e+07	1.95859e+07	2.12293e+07	1.29883e+07
sp1244	51076.5	44310	20915.4	81067.9	28940.7	43191.2	11245.3	50224.5	68957.5	143582	100165	120553	122950	115592	30365.7	47674.4	51232.2	40868.6	161873	52453	102169	118291	88545.2	104240	58187.3	25656.5	70130.7	159918	154179	65454.1	70760.9	291604	61618	142370	35283.8	86102.1	33949.6	40108.7	58209	40280.6	60188	36049.5	29302.7	53152.4	73274.1	59020.8	37969.3	44432.9	30245.4
sp1245	104223	97948.8	57018	14959.4	11650.2	103959	120485	56516.1	13293.7	23148.8	25557.9	57419.7	12898.6	12596.2	75682.7	21181.5	12248.3	14516.6	67663.3	16856.5	62949.1	51094.2	46422.1	30633.7	54261.3	72291.4	71274.1	19745.2	42076.4	56739.1	53818	43974.7	15085.2	18963.2	25484.7	7540.06	71192.7	107267	6395.63	45651.9	40760.6	84568	40718.5	32445.8	34913.1	13709.8	26808.8	14405.4	27474.6
sp1246	694589	368929	607029	381998	188819	512133	409404	313156	429226	154998	239476	165805	404327	402765	428201	389431	269332	348250	381948	292183	393150	406496	89608.8	303696	145167	443018	273309	240360	235783	381724	293126	103839	230218	282414	453836	280160	267146	218710	174640	203531	213796	328325	290516	346675	323474	261771	163071	246041	239008
sp125	12503	88949	205244	209262	220068	53039.6	52288.7	284628	165666	134836	1.43588e+06	221332	617422	408654	390114	304464	265160	96300.1	273135	286649	105049	55434.4	150168	375075	1.22847e+06	23325.2	288145	26574.8	42803.8	33837.2	64954.7	101054	14801.4	31839.2	204148	21412.7	122392	61455.6	10868.6	55092.7	42917.9	113954	8531.53	184309	535105	81575.6	146398	176577	31264
sp1251	167096	194234	114617	112384	145564	93984.9	89063.3	133834	63894.7	101542	72114.9	125037	209567	232348	75502.2	21892.9	56897.8	155407	154873	190898	145605	79250.3	121732	162782	71650.4	28326.4	87755	135387	57832.5	65550.2	185043	24223.3	62435.1	100590	30735.6	49513.6	237675	136989	102119	155961	93034.4	98605.2	46433.6	93636.7	75771.4	122748	80005.3	106156	57907.2
sp1258	432444	330477	428201	278496	229220	321671	350457	92783.1	196265	299715	466456	173448	294348	432617	758568	105058	192038	342136	522190	664978	669024	1.24528e+06	599037	1.28833e+06	414880	300237	188726	197389	317951	247567	293748	265629	225581	180221	136552	272062	216941	246168	261955	184771	151988	180727	189446	239252	273274	225103	131584	184078	210951
sp126	1.3204e+06	1.14022e+06	2.05718e+06	2.97831e+06	2.06757e+06	1.19975e+06	2.0956e+06	2.89796e+06	2.03946e+06	2.41969e+06	2.42742e+06	1.30497e+06	2.63026e+06	2.70596e+06	1.88337e+06	2.52826e+06	2.36686e+06	1.78712e+06	1.73271e+06	2.6001e+06	1.53793e+06	1.84452e+06	1.45454e+06	2.30473e+06	1.81746e+06	2.67781e+06	1.91731e+06	1.25342e+06	2.72502e+06	1.21847e+06	1.16923e+06	1.92561e+06	1.03029e+06	796618	2.20439e+06	2.76024e+06	1.92852e+06	1.8749e+06	1.74121e+06	1.4125e+06	2.0597e+06	1.34968e+06	2.32201e+06	3.21958e+06	3.83768e+06	2.626e+06	1.24603e+06	1.94759e+06	1.0898e+06
sp1265	378625	379375	275278	912423	731043	344144	876120	774667	138608	771627	820009	968600	1.1692e+06	1.17118e+06	527143	670437	826614	669744	953810	1.09632e+06	675259	1.14133e+06	1.08184e+06	978265	620406	1.14898e+06	1.46884e+06	1.84566e+06	1.0099e+06	1.3506e+06	1.07421e+06	1.2973e+06	863146	1.4226e+06	928053	1.53604e+06	2.15037e+06	1.55554e+06	2.1212e+06	1.66293e+06	1.23995e+06	1.0933e+06	1.69867e+06	2.80519e+06	2.36746e+06	1.23719e+06	1.40968e+06	1.52714e+06	1.35595e+06
sp1267	6584.45	7176.97	9731.79	11574.4	5308.73	13440.5	12845	14720.7	7650.42	6626.25	27644.9	43350.9	11753.4	17865.4	13888	3059.56	2883.74	24714.9	30882.2	10894.3	2187.32	26732.4	2782.74	15980	10380.2	17464.2	102776	1107.72	16421.4	5992.63	15096.1	4294.47	15379.2	8982.61	26037.8	43284.1	48329.3	25128.8	30124.9	53255.7	47559.5	134218	57840.6	78868.4	112919	47700.4	46727.1	11587.4	20195
sp1269	2.68482e+06	3.4283e+06	3.42422e+06	5.93657e+06	4.87325e+06	1.70365e+06	4.69087e+06	5.63938e+06	2.90462e+06	3.59427e+06	6.46358e+06	5.47861e+06	9.00053e+06	8.71482e+06	6.5602e+06	9.1037e+06	4.64644e+06	6.02137e+06	4.99543e+06	4.74425e+06	4.1174e+06	5.63976e+06	4.73698e+06	5.80634e+06	4.26219e+06	5.9431e+06	9.11169e+06	1.03035e+07	7.67964e+06	5.36556e+06	5.61585e+06	8.05429e+06	4.43742e+06	9.67668e+06	6.00431e+06	1.03514e+07	9.34806e+06	7.73733e+06	7.09727e+06	8.48683e+06	8.94497e+06	1.22196e+07	1.12659e+07	1.15053e+07	1.19755e+07	1.09244e+07	1.017e+07	9.67191e+06	8.59046e+06
sp127	445786	317570	355550	143245	179313	569258	624069	299916	317102	297417	96762.8	189390	249313	281152	308367	215476	151983	241963	341240	228447	469128	331785	254579	419157	372972	451172	270645	238431	380973	234593	303374	316487	133307	303369	526411	148784	235886	176456	53191	82206.7	156743	144853	146562	89031.4	146664	54056.1	261410	112113	123603
sp1272	1.04206e+07	1.92004e+07	1.32841e+07	1.05693e+07	1.10351e+07	1.31923e+07	1.27024e+07	1.90157e+07	7.19299e+06	1.1622e+07	7.47089e+06	7.80079e+06	1.54174e+07	1.76075e+07	6.98936e+06	7.9261e+06	2.7836e+06	1.35516e+07	1.69412e+07	1.83782e+07	1.66799e+07	2.14558e+07	1.66333e+07	1.39621e+07	1.19266e+07	4.00131e+06	1.76215e+07	1.23595e+07	1.1364e+07	9.78406e+06	1.56572e+07	5.02346e+06	6.81736e+06	1.03936e+07	9.1632e+06	1.65251e+07	1.77157e+07	1.7467e+07	1.45608e+07	1.1751e+07	1.82695e+07	1.85967e+07	1.65984e+07	1.64646e+07	1.47776e+07	1.39266e+07	1.46774e+07	1.52815e+07	1.07128e+07
sp1274	5.30067e+06	4.76807e+06	6.69557e+06	2.94252e+06	1.93871e+06	5.48574e+06	4.81859e+06	4.29609e+06	6.60554e+06	4.92867e+06	4.94563e+06	3.0133e+06	6.15664e+06	7.88056e+06	1.14442e+06	7.46676e+06	3.82815e+06	2.66941e+06	2.94181e+06	2.76214e+06	2.19502e+06	3.3759e+06	2.20728e+06	3.29642e+06	553449	3.21338e+06	1.88216e+06	2.85908e+06	2.43557e+06	1.13923e+06	1.29078e+06	2.83165e+06	756610	2.48406e+06	2.22552e+06	1.55833e+06	1.46495e+06	1.35456e+06	899092	1.21679e+06	2.45898e+06	2.24274e+06	1.96041e+06	2.81825e+06	3.37195e+06	1.81939e+06	3.33925e+06	1.686e+06	2.01303e+06
sp1275	45877.9	50321	71615.4	54704.7	47239.9	40287.5	44626	59258.6	52546	49496.4	44247.2	42221.8	44168.1	26611.8	54662.5	45763.1	45046.1	35757.2	37921.4	12285.3	38654.2	54182.5	43753.7	44349.7	2582.06	47403.2	17263.3	39577.7	24944.6	42189.5	42474.1	28414.6	23256.9	26531.9	27330.1	27886	12264.7	17868	30249.8	17581.1	16762.9	15531.9	6469.04	27099.4	22490.2	6494.1	15404.5	19554.8	24996.5
sp1277	92653.5	111005	96172.4	62852.7	102290	76757.4	40001.5	99337.5	34304.7	76128.5	52201.2	56398.7	98990.6	73345.9	66398.3	28987.6	8327.53	99517.2	49765.9	122403	82087.1	109974	93419.6	67830.3	74792.3	20872	57365	42246.6	69658	65846.7	92606.7	13247.4	48439.7	60228.7	71424.6	82445	93303.1	106917	82694.2	99632.2	90038.2	87495.9	13622.3	72041.4	54974.4	42672.6	52688	56298.5	61488.1
sp1279	65583.2	166097	162011	17710.2	30677.1	9022.49	45023.7	84434.2	41109.6	19535.6	227407	136237	84149.3	58934.3	18208.9	46763.8	80611.8	176193	95337.8	115753	34110.6	93716.1	46155.6	211717	78869.1	76840.5	11498	21233.4	57609.2	143404	387237	147250	122632	17057.7	163846	247412	134517	137412	120546	90585.1	58503	168121	144006	40056.6	91328.1	36564	172218	78663.6	82534.8
sp1281	6155.6	7733.82	8510.39	5182.03	4334.74	5757.75	18042.9	11332.4	9075.79	37277.7	75580.2	62299.2	39312.7	61096.5	8881.28	32736.2	6298.75	65520.7	31387.9	32307.5	35980.8	37581.3	51717.5	47312.9	16103.6	75670.8	604378	2951.38	19313.9	15531.6	43996.9	5442.35	61592.6	2901.37	40277.9	91413.3	67571.5	19407.3	82026.1	72779.7	63304.1	127225	57422.8	97812.2	137632	118732	75273.4	38179.9	51900.5
sp1282	1.75362e+06	284682	133528	1.06767e+06	49111.4	89326.7	1.83489e+06	158229	49235.1	1.07126e+06	34769.4	74647.7	142122	183855	35885	40613.8	18732.7	1.32568e+06	89725.4	1.88366e+06	1.54779e+06	1.89243e+06	1.7535e+06	1.31446e+06	1.08561e+06	343349	1.43122e+06	1.02447e+06	620891	985547	1.72702e+06	472504	798039	905624	772863	1.06873e+06	1.69752e+06	1.50616e+06	1.41641e+06	1.46487e+06	979025	1.05177e+06	1.09334e+06	749679	906217	1.20696e+06	848993	545144	881768
sp1283	1.68953e+06	1.67066e+06	1.60703e+06	1.0709e+06	831422	1.00171e+06	1.89648e+06	1.73487e+06	1.05961e+06	1.30622e+06	759663	881956	2.42622e+06	2.353e+06	1.07092e+06	548850	313446	1.59916e+06	1.95561e+06	1.96821e+06	867067	1.77359e+06	1.9918e+06	1.23251e+06	1.2364e+06	368287	1.93972e+06	1.00858e+06	1.15493e+06	1.03104e+06	1.37731e+06	335703	867580	1.17705e+06	921854	1.5716e+06	1.78393e+06	1.2337e+06	1.22233e+06	1.38597e+06	967475	1.08669e+06	783171	455608	653585	1.09975e+06	951625	947320	600431
sp1284	210205	128046	339678	57388.2	74472.4	255443	269357	149198	195827	333271	166095	147632	182706	188140	175933	136811	123061	210275	332641	303218	310056	313745	201154	411023	231839	327721	157185	89498.1	162950	138278	148463	238473	59101.2	90096.6	188150	117897	142753	121416	87425.6	49573.2	150725	99399.7	202800	178853	250830	94680.4	128033	160967	158685
sp1286	4.58805e+06	5.44689e+06	6.81498e+06	7.9282e+06	4.88971e+06	4.69676e+06	4.21849e+06	5.85575e+06	4.28791e+06	6.4687e+06	6.50538e+06	5.56635e+06	5.72922e+06	7.97909e+06	5.90521e+06	4.73989e+06	5.53262e+06	6.33711e+06	5.0739e+06	7.24756e+06	5.39456e+06	6.20923e+06	5.04148e+06	6.94394e+06	5.90736e+06	4.29532e+06	6.51611e+06	5.26791e+06	4.67744e+06	5.78491e+06	7.88566e+06	6.41906e+06	7.60754e+06	5.97107e+06	7.51865e+06	8.00987e+06	7.74116e+06	9.27944e+06	8.90772e+06	6.0943e+06	4.67191e+06	5.91199e+06	3.2307e+06	8.38896e+06	6.94178e+06	3.96067e+06	3.97917e+06	5.96571e+06	4.59773e+06
sp1288	167683	240373	291959	426079	208483	220407	270986	437257	371582	311702	456889	216075	304677	382101	265504	765001	341720	313542	261578	260398	271175	216150	170191	340387	341983	312579	158220	108221	239221	221411	212752	225195	25116.8	70934	150287	223654	251418	269522	177043	180264	444040	211540	365980	790188	832897	1.0402e+06	76041.1	251944	205712
sp129	117669	261484	323713	409090	395052	205911	222111	811839	169874	293088	1.30405e+06	1.6644e+06	526479	734299	466510	673845	1.21551e+06	789744	424370	591411	1.34382e+06	379600	966285	251961	544138	399226	4.21329e+06	379419	703166	320806	616060	778177	298356	388362	593520	354665	443406	386485	393133	696478	347636	787750	161329	487389	674552	898474	189165	684831	432462
sp1293	237193	566431	453824	449731	229073	170803	312163	388529	312180	356076	371935	14175.4	290816	331956	2.16335e+06	562849	382299	153209	404063	206398	115757	241397	92127.3	538589	250810	220665	52487.3	100497	162198	153960	271491	154186	226712	110443	667854	62466.4	55539	35901.1	34562.8	36139.2	25745.8	43396.8	42489.9	131268	94082.4	34700.9	52030.6	55372.2	54478.9
sp1299	6435.93	10561.9	7665.75	5641.24	6833.12	7570.05	49610.4	1714.01	2615.18	22245.1	41643.7	75795.1	24182.3	43001.9	4038.29	4628.05	19216.2	11321.7	11285.2	33821.1	26411	13596.2	48212	13051.3	29076.7	63577.3	211595	383861	16654.6	24526.8	28627.9	1830.81	32777.5	234661	31368.3	25749.9	11927.2	4441.8	23429.3	21298.2	36670.8	39769	28865.2	39398.5	52157.6	56790.9	21064.2	2752.83	16201
sp130	330699	329401	266620	472149	493461	354795	239534	627080	391850	447207	421945	717209	560141	510352	746101	253296	378483	524654	321691	833575	423015	1.07843e+06	434698	423307	391096	592624	420804	705716	609803	579367	391752	640267	463302	402940	753592	427759	363879	427387	330052	585766	301567	474438	288266	628555	566409	370076	255897	374124	230537
sp1300	117563	105556	1642.89	107139	36257.2	293417	76230	117705	129984	721676	4403.82	2.0985e+06	2.13848e+06	1.14292e+06	120353	3556.55	165068	3688.75	562.148	1991.63	268729	169858	119375	315227	180430	92978.2	633268	555758	1.09786e+06	192302	771829	537167	253004	872188	269516	1.00916e+06	974249	1.23741e+06	1.3191e+06	847711	1.18504e+06	940581	720588	1.11843e+06	1.32121e+06	1.26793e+06	1.12552e+06	885580	604096
sp1301	142587	73647	4381.05	114731	30650.7	360179	88005.2	96403.3	115519	933217	12248.4	2.97581e+06	1.94982e+06	1.50465e+06	108478	2474.19	201646	9656.71	245.954	6145.11	200591	94355.3	131324	173150	146760	111548	560290	517020	1.08812e+06	181426	519488	455654	263202	797301	317596	1.1168e+06	810578	1.10496e+06	1.32449e+06	886970	1.25293e+06	1.14708e+06	921640	956337	1.82709e+06	844030	874918	656348	786843
sp1302	5924.46	21600.2	68743.9	4675.81	545.033	28188	126097	7248.1	2276.3	126936	197862	37868.9	813076	936210	6737.68	20333.2	31031.9	500989	130014	304816	44203.9	584653	12873.8	222176	305089	205545	171004	9411.23	25833	75281.4	1.53612e+06	3320.85	5962.03	1484.15	130186	102513	76049.3	89501.5	119667	108879	99173.6	159643	104191	164284	409698	349700	96637.6	29787.6	54135
sp1303	33235.9	20103.9	2247.57	47516.4	6359.05	71374.7	24847.1	19537.7	14072.9	194480	5819.97	615373	435330	420453	31809.4	11697.9	61947.7	413.246	100	1243.13	31879.2	49847.8	13954.1	38746.5	36355.6	21824	149782	142146	338167	47961.8	198876	124455	60283.7	154236	61013.5	362567	257076	264461	224380	228431	328429	318955	274661	201603	323065	119822	341545	206525	48623.3
sp1304	206537	183514	152950	42235.5	62775	285625	411910	163318	225014	75192.7	104102	124785	122953	130465	262378	160869	48610.8	58782.8	198244	33571	160724	130372	131732	92113.2	71902.3	247183	150800	123317	182681	54044.6	67856	67556.3	13959.3	106600	11660.7	73116.9	98783.7	124267	12399.5	121487	82308.6	160997	40291.3	14190.3	24630.2	3658.76	136963	15305.7	26806.7
sp1305	1.04124e+06	440651	1.21084e+06	132022	180138	412886	939998	1.43437e+06	152139	1.0409e+06	130483	148987	885829	947980	149610	132152	170137	1.17466e+06	683252	787341	1.23737e+06	1.25291e+06	708921	907016	588354	227428	756054	511177	523737	904822	881230	18746.1	355883	238562	223002	1.19402e+06	229563	630968	349884	355079	639537	597828	581006	445147	531738	408119	488385	278224	145802
sp1309	9985.56	53286.4	79960.8	228424	75558.5	38713.9	57632.8	13582.5	37663.8	112545	52958.7	381283	20587	45509.1	38098.9	357649	43490.9	16809.1	168459	106950	146465	34840.4	216873	32817.3	68479.6	28536.9	460332	267471	182357	37630.4	20661.1	213772	183784	239293	57616.8	193535	221204	157835	188593	336493	167178	177618	100911	246288	326302	96104.7	91775.8	215377	106540
sp131	89189.6	173661	86596.6	178349	136811	111708	241825	89010	195945	198053	198184	300641	91086	108771	177455	230183	231256	88718.1	83313	154930	163722	86432.8	151178	76737.1	159009	164102	356482	250972	248036	167046	134708	192870	97437.5	210739	99354.6	130983	275787	200998	179979	222958	171680	260502	136444	193735	209500	188042	189206	147040	111902
sp1313	4600.26	9588.82	3918.91	12954.4	5102.85	8573.59	2748.28	2040.33	7005.77	39574.7	9230.46	47382.9	124495	165645	6949.76	10808.1	3590.63	12584.6	14356.5	2989.17	14134.6	3336.65	6657.86	13362.2	15136.6	12239.5	164089	245139	32849.8	21089.2	13494.8	162362	3010.71	295952	24776.7	327701	346469	336181	294134	253948	383278	230587	272705	534130	453499	611972	322539	250050	96051.1
sp1318	1.71474e+06	1.49186e+06	1.44596e+06	366751	319994	3.51104e+06	3.1566e+06	1.20873e+06	1.06442e+06	1.95878e+06	356929	1.37701e+06	1.10349e+06	1.33989e+06	783204	373201	648181	814780	2.00061e+06	890525	2.7138e+06	918845	1.78628e+06	1.24164e+06	2.33207e+06	3.638e+06	1.12573e+06	528191	2.93709e+06	759866	1.76381e+06	1.06278e+06	258304	369925	1.88128e+06	194681	566892	559420	169772	278620	350966	443790	488998	109064	326480	28291.9	605089	93630.7	141292
sp132	61902	42167	50086.3	63114.7	82872.8	88490.4	58966.9	54416.1	18563.2	70866.9	66122.3	64128.7	54581.4	98024.4	43582.9	70974.5	76562.4	93782.3	19653.9	43745.2	55076.4	84238.2	47914.6	57989.7	66758.2	61386	78581.7	101747	82129.5	101679	85793.6	64873.2	68276.1	79817	74551.6	63692.3	27709	41091.7	33905.7	48769.3	58634.4	58022.7	37806.7	59570.4	62480.4	14814.2	60734.5	39284.7	40153.5
sp1321	1.35376e+06	913615	1.09789e+06	334507	239351	1.68157e+06	1.80815e+06	661471	482872	911381	184143	310774	478063	477599	634001	148473	223560	428684	1.40213e+06	772768	2.03387e+06	926080	903055	919566	1.35577e+06	1.44045e+06	1.08245e+06	291973	1.15948e+06	502228	817780	709265	228359	461646	946988	149845	414493	299490	110519	229294	266362	251820	207894	60388.5	136551	29124.7	322471	95233.1	75392.5
sp1329	251332	165090	169684	406824	204050	277622	112398	75842.1	106374	108663	36585.3	188379	38557.4	77822	248750	76169.2	101034	135150	41773.7	58218	254032	169698	415329	6881.51	109360	261564	280704	467254	133665	158855	204658	441724	162197	318577	240074	844705	966427	843086	1.20344e+06	737581	516793	351431	545257	141399	268747	24910.3	759088	426188	448606
sp133	2.67343e+06	2.29101e+06	1.12411e+06	3.00258e+06	3.01753e+06	3.59461e+06	1.70065e+06	2.8036e+06	1.66476e+06	3.91428e+06	4.37675e+06	4.13335e+06	3.46108e+06	4.64987e+06	5.54328e+06	2.27333e+06	3.05196e+06	4.34587e+06	1.67264e+06	3.88143e+06	4.9681e+06	2.43789e+06	4.16294e+06	1.78096e+06	2.92358e+06	4.76992e+06	4.24479e+06	3.96608e+06	1.12545e+07	3.19914e+06	2.49221e+06	9.29187e+06	1.95873e+06	3.05978e+06	2.25254e+06	2.71867e+06	3.19342e+06	2.98726e+06	3.15253e+06	2.59107e+06	3.33014e+06	3.83483e+06	2.31431e+06	2.67058e+06	3.50132e+06	2.84272e+06	3.61135e+06	2.64978e+06	1.7944e+06
sp1339	196430	141768	181160	387641	187560	192349	181771	322772	218728	148544	419760	180382	230329	236684	228377	766660	270619	255202	172290	198801	202821	130443	115759	402088	308168	307974	148564	67078.5	322602	182728	136177	214517	53796	60918.7	121336	247609	214385	212153	190739	202946	315077	245359	276036	754547	869701	987374	118913	249541	230587
sp1345	767663	458057	612847	129009	115019	623059	409717	985751	116549	453691	52723.4	273405	720028	981718	112273	28509.7	15839.8	1.75395e+06	652536	901966	410615	1.39823e+06	846771	630426	624858	230510	845494	400125	449143	820606	942968	34272.3	160229	349709	201360	942158	1.03553e+06	834798	761222	523826	795342	848684	978957	863522	495226	593657	553342	837689	481658
sp1346	58316.1	43439.2	42231.5	5899.25	16818.4	59287.2	17208.1	101501	323.684	31416.5	1670.5	16302.6	45332.1	49911.8	11671.4	2174.97	1965.03	120557	57099.1	71293.6	19052.3	102681	61672.1	49741.7	17451.7	8986.85	54089.3	38053	24415.2	49345.1	55258	1614.64	6881.4	22291.7	8730.81	46540.6	59224	57536.8	45194.8	28922.5	34732.7	32612.2	20150.4	28399.8	19224.6	1743.14	21526.2	25054.4	12051.3
sp135	1.02211e+06	1.15516e+06	744586	726104	904518	1.34181e+06	769416	1.45394e+06	615668	1.28305e+06	1.38399e+06	2.5232e+06	1.33701e+06	1.31807e+06	1.35973e+06	1.29942e+06	1.32428e+06	1.14582e+06	1.92445e+06	1.1814e+06	1.81074e+06	1.31121e+06	1.03196e+06	1.10758e+06	1.44886e+06	1.01848e+06	2.33805e+06	2.1638e+06	1.5591e+06	1.293e+06	1.40205e+06	1.8983e+06	1.29063e+06	2.15365e+06	2.26342e+06	3.15201e+06	2.9047e+06	3.04679e+06	2.72715e+06	2.52349e+06	2.44428e+06	2.78315e+06	2.59777e+06	2.48139e+06	2.19218e+06	1.84679e+06	3.19381e+06	3.13867e+06	3.01952e+06
sp1357	91155	86220.6	122719	107330	100580	87485.5	83441.5	79417.3	75616.8	92641.4	89054.5	108265	82020.2	99134.5	78131.4	85554.3	86667.6	91815.8	77528.7	78545.6	100564	74898.6	95812.6	82584.6	99234.5	81770.2	96805.5	123214	97032.5	94174.7	95033.3	96310.1	99687.9	95117.1	95060.6	118781	117418	99791.8	108253	106738	129755	173771	165120	178442	178180	148249	184929	175792	146530
sp136	343174	515401	502067	275852	237793	435039	572232	205841	242819	679606	660785	953639	458456	363294	408215	679997	242135	576717	408119	398687	553821	482105	436253	372041	406733	848497	791499	676404	1.13975e+06	867994	441800	1.07046e+06	320581	653050	234044	995223	765521	867165	966713	838940	762831	1.06227e+06	518514	869604	854661	719806	910170	745150	619825
sp1360	1.21213e+07	2.233e+07	1.84854e+07	1.7527e+07	1.63226e+07	1.29035e+07	1.65746e+07	2.40451e+07	1.86445e+07	1.40712e+07	1.53585e+07	1.11853e+07	1.26675e+07	1.30346e+07	2.67942e+07	2.26634e+07	1.66894e+07	1.2851e+07	1.28369e+07	1.06961e+07	1.36657e+07	1.21722e+07	1.72284e+07	1.31432e+07	1.66316e+07	7.03866e+06	1.30637e+07	2.03038e+07	1.50153e+07	1.17554e+07	1.25899e+07	1.07237e+07	8.02831e+06	1.94179e+07	9.93591e+06	1.50913e+07	1.75916e+07	1.35005e+07	1.4116e+07	1.29398e+07	1.62048e+07	1.45312e+07	1.24897e+07	1.47203e+07	1.00596e+07	1.19841e+07	1.35073e+07	1.55877e+07	1.1555e+07
sp1365	9.87776e+06	1.86681e+07	1.31181e+07	1.98482e+07	2.11963e+07	9.04854e+06	6.90983e+06	1.76582e+07	9.78692e+06	8.26721e+06	1.2e+07	9.00481e+06	6.36694e+06	7.07935e+06	1.94818e+07	1.25768e+07	3.13224e+07	7.50697e+06	1.08887e+07	1.01278e+07	1.39456e+07	1.35531e+07	6.64766e+06	1.38555e+07	8.28444e+06	2.66827e+06	1.01779e+07	1.71251e+07	8.45846e+06	6.91669e+06	7.98731e+06	5.57806e+06	3.81002e+06	1.26672e+07	4.81262e+06	1.652e+07	9.06915e+06	8.88407e+06	7.60584e+06	6.56431e+06	8.88632e+06	7.77678e+06	6.42291e+06	1.57098e+07	7.30071e+06	1.07985e+07	6.68918e+06	1.14688e+07	6.93566e+06
sp1367	289796	308362	213322	343716	252755	116349	217180	253390	186548	237518	259380	158992	241591	174766	302643	207701	232040	197761	160431	109314	89691.3	263350	219120	247232	210203	388353	219887	169064	161934	201020	341312	136735	211012	218265	139884	277346	287575	251446	206943	166797	1.27366e+06	1.41019e+06	1.21607e+06	1.33637e+06	1.01708e+06	1.09757e+06	1.21014e+06	1.15913e+06	1.25177e+06
sp1370	2.87887e+07	2.00131e+07	2.05593e+07	1.2434e+07	4.0263e+06	2.16982e+07	1.65042e+07	2.54693e+07	4.53448e+06	2.31499e+07	8.75954e+06	2.02426e+07	2.77435e+07	3.00586e+07	1.09542e+07	7.14172e+06	6.551e+06	4.25875e+07	2.99102e+07	3.38821e+07	7.23965e+06	2.59027e+07	2.64194e+07	2.67348e+07	6.6748e+06	1.32143e+07	2.11187e+07	1.84754e+07	2.41959e+07	2.88075e+07	2.63781e+07	3.85254e+06	1.09759e+07	1.83029e+07	1.44614e+07	3.30637e+07	3.96849e+07	4.30856e+07	3.76038e+07	1.22338e+07	2.57457e+07	3.68238e+07	3.02914e+07	3.98041e+07	2.12404e+07	4.13974e+07	1.99174e+07	3.50616e+07	1.63594e+07
sp1371	338950	557541	445112	279442	293392	384449	298587	344684	209055	215213	260120	495665	483474	634124	215596	322430	137946	660609	581654	706085	426971	781979	278350	419636	288884	114564	263176	181017	394843	363775	304010	117092	204478	226609	260663	715710	803233	987992	532861	629142	612084	437312	525094	805659	163917	605697	411875	683153	368407
sp1372	3.98065e+07	1.23015e+07	1.98379e+07	5.31837e+06	5.38959e+06	2.81505e+07	1.66262e+07	3.59354e+07	8.52963e+06	2.01898e+07	3.53294e+06	1.19585e+07	2.39892e+07	2.20326e+07	5.0429e+06	3.48088e+06	2.57261e+06	5.28293e+07	2.43492e+07	2.8396e+07	1.77776e+07	2.75675e+07	2.33956e+07	2.96855e+07	2.50163e+07	1.68666e+07	3.28744e+07	2.1168e+07	2.51404e+07	4.64305e+07	3.95772e+07	6.71266e+06	1.02761e+07	1.76932e+07	1.09384e+07	3.36316e+07	2.66724e+07	2.93837e+07	2.677e+07	2.09845e+07	2.43372e+07	2.14096e+07	2.32411e+07	2.95697e+07	2.08329e+07	1.95258e+07	1.60439e+07	2.32565e+07	1.69716e+07
sp1373	1.33661e+06	1.21939e+06	1.85399e+06	699972	494135	1.21716e+06	1.36089e+06	1.60193e+06	257311	2.28297e+06	722842	874958	1.66014e+06	1.59832e+06	908618	521798	535119	1.60039e+06	1.33399e+06	3.17632e+06	2.09669e+06	1.61967e+06	1.53225e+06	1.51896e+06	1.01273e+06	613117	984512	1.03441e+06	1.77831e+06	1.10215e+06	2.61976e+06	431864	681224	1.18274e+06	645901	2.01012e+06	3.36499e+06	2.90545e+06	2.13805e+06	1.64408e+06	2.7608e+06	1.94471e+06	1.34593e+06	3.2765e+06	1.51908e+06	1.8441e+06	2.31205e+06	2.41173e+06	1.6061e+06
sp1374	3.39721e+06	3.52856e+06	3.02759e+06	1.51461e+06	1.88522e+06	3.38476e+06	2.57643e+06	4.81649e+06	1.85959e+06	3.59365e+06	1.63188e+06	2.96767e+06	3.74096e+06	4.83932e+06	2.16254e+06	1.43539e+06	719025	2.21395e+06	4.03067e+06	5.9471e+06	4.85107e+06	4.16923e+06	4.05382e+06	3.96543e+06	2.18916e+06	702512	2.20749e+06	1.95408e+06	3.22466e+06	2.4683e+06	3.77331e+06	1.20153e+06	2.08263e+06	2.2554e+06	1.74576e+06	3.82727e+06	5.65968e+06	4.68905e+06	5.12623e+06	4.91996e+06	3.53857e+06	4.48118e+06	3.81459e+06	2.54541e+06	2.23913e+06	3.60753e+06	3.4157e+06	1.94791e+06	1.785e+06
sp1375	39043.8	70423.7	74310.6	82338.3	60765.8	107113	25763.4	186362	133047	65610.7	977632	73423.3	92947.1	73557	97738.3	540178	53924	101263	110860	235350	122782	105317	230206	100116	52620.9	12906.1	65258	45778.2	52484	47790.5	89421.5	40346.6	38991.3	96388	189905	93810.8	308782	169439	69800.9	195876	123596	137191	83954.7	164532	109360	147000	57755.4	204171	83416.7
sp1377	5.80513e+06	4.14318e+06	5.02916e+06	2.3147e+06	2.65216e+06	5.73237e+06	3.33158e+06	7.16479e+06	2.074e+06	5.09274e+06	1.58398e+06	3.2941e+06	6.2499e+06	6.66864e+06	2.36085e+06	1.51489e+06	1.02347e+06	9.88778e+06	6.27556e+06	2.78194e+06	5.45021e+06	8.14602e+06	5.97872e+06	5.586e+06	4.86465e+06	3.53644e+06	5.7711e+06	4.37988e+06	4.7353e+06	5.93219e+06	6.0283e+06	1.32586e+06	2.13721e+06	3.77403e+06	2.30398e+06	7.17928e+06	6.67861e+06	6.1611e+06	6.1817e+06	4.86336e+06	6.21939e+06	6.11294e+06	6.12205e+06	5.78903e+06	4.79337e+06	4.55622e+06	3.88934e+06	6.34022e+06	4.33662e+06
sp1378	5.50276e+06	3.1929e+06	4.9529e+06	2.52725e+06	2.05351e+06	5.72209e+06	3.31466e+06	7.58424e+06	2.04009e+06	4.25566e+06	1.29425e+06	2.77593e+06	5.29039e+06	6.21766e+06	2.08746e+06	1.186e+06	921006	9.90056e+06	5.87636e+06	5.78942e+06	4.35833e+06	7.03752e+06	5.99161e+06	5.40338e+06	4.49862e+06	3.53245e+06	6.43901e+06	4.71748e+06	4.23561e+06	5.44614e+06	6.25833e+06	1.05669e+06	2.22061e+06	3.05855e+06	2.80545e+06	7.04777e+06	7.73265e+06	6.92755e+06	7.13177e+06	4.31889e+06	5.58793e+06	5.48837e+06	5.80602e+06	5.26637e+06	3.95782e+06	3.80844e+06	1.64943e+06	5.4311e+06	4.49762e+06
sp1379	13512.9	125780	60657.8	23008.1	61983.9	47892.2	22568.5	67956.7	56096.5	48853.4	55405.2	55439.7	102185	85802.9	40898.2	61596.4	17910.6	75874.8	75820.1	126204	86308	83323.6	54355.3	18144	27586	12316.6	35885.1	11606.5	9043.75	11413.9	27696.3	17503.6	43942.3	34491	24114.2	59828.2	124665	60664.1	61253.9	67003.2	86889.6	73819.7	57995	163163	27071.7	68906.7	63582.3	35057.6	34827.4
sp1380	9.11507e+06	4.34472e+06	8.97321e+06	768522	846946	7.88659e+06	9.35045e+06	8.92775e+06	688703	5.98792e+06	652272	701058	3.9537e+06	4.6302e+06	963191	1.31294e+06	1.20739e+06	4.62852e+06	3.64817e+06	7.15424e+06	5.5926e+06	2.14862e+06	6.36034e+06	4.04107e+06	2.97354e+06	1.37225e+06	5.99098e+06	1.59035e+06	7.64458e+06	4.06929e+06	7.49466e+06	441517	2.13503e+06	1.93695e+06	888223	1.00725e+07	1.19691e+07	1.17604e+07	1.30962e+07	5.76992e+06	9.42341e+06	7.67367e+06	6.58145e+06	4.88366e+06	4.58123e+06	3.24913e+06	8.33604e+06	1.04066e+07	6.77444e+06
sp1381	1.95028e+06	1.22072e+06	2.48242e+06	207963	201125	1.87393e+06	2.00594e+06	1.94488e+06	259784	1.41051e+06	182949	159916	1.10383e+06	1.22192e+06	269101	339172	283980	1.24966e+06	1.0164e+06	1.64349e+06	1.20908e+06	666943	1.85328e+06	930311	705949	338143	1.30572e+06	449113	2.09069e+06	1.13124e+06	1.65652e+06	87055.3	509980	487028	220456	2.2896e+06	3.05164e+06	2.95325e+06	3.50998e+06	1.43531e+06	2.24419e+06	2.26181e+06	1.44102e+06	1.23757e+06	1.08676e+06	703729	2.09814e+06	2.98443e+06	1.61771e+06
sp1382	1.77652e+07	9.74931e+06	1.68183e+07	2.78336e+06	2.90124e+06	1.23657e+07	1.53798e+07	1.37874e+07	2.25979e+06	1.04646e+07	2.78795e+06	2.70266e+06	1.39976e+07	1.80269e+07	2.84521e+06	3.44761e+06	5.43454e+06	1.4478e+07	1.06552e+07	1.94415e+07	1.40101e+07	1.0323e+07	1.00034e+07	1.01081e+07	7.278e+06	3.07211e+06	1.0441e+07	4.0484e+06	1.15126e+07	1.38422e+07	1.58589e+07	1.56962e+06	5.79965e+06	5.43418e+06	4.55218e+06	1.65841e+07	1.21514e+07	1.88306e+07	1.64312e+07	1.3794e+07	1.55419e+07	1.38462e+07	1.31471e+07	1.72334e+07	1.13164e+07	9.73529e+06	1.43502e+07	1.20685e+07	9.7066e+06
sp1383	7.37214e+06	3.54816e+06	8.51093e+06	1.44256e+06	1.08297e+06	4.69886e+06	7.88101e+06	7.64331e+06	1.16337e+06	6.43222e+06	1.41689e+06	1.87271e+06	7.04961e+06	8.20651e+06	1.17546e+06	1.50853e+06	2.71579e+06	2.54905e+06	5.56221e+06	9.3966e+06	7.08582e+06	4.69781e+06	4.8414e+06	4.68933e+06	2.93205e+06	1.33911e+06	4.39942e+06	2.26435e+06	4.19183e+06	6.67102e+06	8.56447e+06	823850	2.1384e+06	2.80135e+06	1.39572e+06	8.21697e+06	1.01458e+07	8.62194e+06	7.45852e+06	5.09372e+06	8.61989e+06	7.3109e+06	6.19118e+06	7.26287e+06	4.88563e+06	4.45774e+06	5.88567e+06	7.85514e+06	5.14973e+06
sp1384	3.69403e+07	2.63026e+07	4.72314e+07	8.74227e+06	6.68136e+06	3.41871e+07	3.92176e+07	3.33194e+07	6.56682e+06	2.4455e+07	7.20738e+06	1.03278e+07	3.30838e+07	4.14254e+07	8.77617e+06	1.09994e+07	1.24124e+07	3.72981e+07	3.26222e+07	5.0769e+07	2.99675e+07	2.40154e+07	2.33896e+07	3.13396e+07	1.71225e+07	1.02679e+07	2.13705e+07	1.34584e+07	2.39903e+07	3.26611e+07	5.24312e+07	4.35395e+06	1.31815e+07	1.47562e+07	1.13983e+07	3.73814e+07	4.52736e+07	4.46284e+07	4.87936e+07	2.64618e+07	3.99392e+07	2.91584e+07	3.90093e+07	4.19789e+07	2.43832e+07	2.52968e+07	4.22655e+07	2.45377e+07	3.39883e+07
sp1385	2.6765e+06	2.15246e+06	4.2771e+06	669177	522194	2.39062e+06	3.92621e+06	3.07859e+06	675063	2.63099e+06	380783	544876	3.42048e+06	3.85844e+06	1.00369e+06	746862	581783	2.90179e+06	2.49077e+06	2.41159e+06	2.66163e+06	2.52896e+06	2.17975e+06	3.34423e+06	2.43606e+06	1.21029e+06	2.89493e+06	607231	1.95454e+06	3.36793e+06	4.03222e+06	277063	996052	722609	1.12625e+06	3.06955e+06	3.48842e+06	3.76807e+06	3.15081e+06	2.13322e+06	2.12564e+06	3.29755e+06	2.46097e+06	2.19196e+06	2.01422e+06	1.28244e+06	2.81486e+06	2.90796e+06	2.26344e+06
sp1386	9.66723e+06	9.9108e+06	1.43794e+07	1.14725e+07	9.05111e+06	1.42781e+07	9.99517e+06	1.11613e+07	1.14187e+07	2.05403e+07	7.87898e+06	1.93163e+07	9.57404e+06	1.31892e+07	3.65116e+06	1.2005e+07	2.41952e+07	1.86664e+07	1.68976e+07	4.20103e+07	2.03075e+07	1.32194e+07	1.48307e+07	1.63945e+07	4.21507e+06	2.55002e+06	1.00342e+07	1.82215e+07	1.68611e+07	8.33037e+06	1.05325e+07	8.79629e+06	5.29666e+06	4.78306e+06	4.94352e+06	1.24976e+07	2.02913e+07	2.61717e+07	2.91782e+07	1.80258e+07	2.06831e+07	1.7678e+07	1.46792e+07	1.77853e+07	1.39867e+07	1.59157e+07	1.14356e+07	8.17589e+06	1.06412e+07
sp1387	6.98661e+06	6.65961e+06	1.2835e+07	1.98159e+06	1.72962e+06	7.06954e+06	1.00816e+07	9.04681e+06	1.98364e+06	8.64817e+06	1.1529e+06	1.54994e+06	1.1438e+07	1.1828e+07	3.11422e+06	2.25983e+06	1.82917e+06	8.09785e+06	7.40583e+06	7.70376e+06	8.28175e+06	7.54013e+06	6.4378e+06	9.93615e+06	7.25919e+06	3.78448e+06	8.97936e+06	1.99207e+06	6.17761e+06	1.00835e+07	1.23053e+07	767970	3.16959e+06	2.05266e+06	3.40935e+06	9.41406e+06	1.14092e+07	1.09897e+07	8.8642e+06	7.06257e+06	5.91497e+06	1.07113e+07	7.45906e+06	6.99091e+06	6.06682e+06	3.89416e+06	8.66289e+06	8.96025e+06	7.178e+06
sp1388	455431	413753	898425	598006	448553	298212	479646	503113	305528	758284	358148	967092	460708	580267	506405	646619	610890	729767	587281	1.92437e+06	707382	560846	757952	681110	260915	78205.2	536837	810663	585293	413246	544407	365761	158096	682430	328308	458623	663645	804021	1.34367e+06	717168	769440	711971	277664	1.55095e+06	618382	920274	682027	369936	412934
sp139	3.61711e+06	4.0563e+06	4.30019e+06	6.30181e+06	4.17846e+06	3.80934e+06	3.91695e+06	6.0629e+06	5.67125e+06	4.0579e+06	5.74504e+06	3.35015e+06	5.59666e+06	5.96581e+06	3.96569e+06	7.54301e+06	5.37955e+06	4.6975e+06	3.60549e+06	4.10197e+06	3.4851e+06	3.42317e+06	2.67394e+06	6.12058e+06	5.46345e+06	4.93405e+06	3.53441e+06	2.16023e+06	4.26235e+06	3.73718e+06	3.15952e+06	3.79547e+06	1.62068e+06	1.81406e+06	3.2883e+06	4.64925e+06	3.7519e+06	3.57832e+06	3.7435e+06	3.66457e+06	5.43388e+06	3.92246e+06	4.81781e+06	7.99091e+06	9.73984e+06	1.04509e+07	2.63818e+06	4.25091e+06	3.48998e+06
sp1390	1.53976e+07	2.9648e+07	2.07642e+07	1.32314e+07	1.21901e+07	1.72645e+07	1.37831e+07	1.69429e+07	7.41199e+06	1.09444e+07	9.97098e+06	1.3353e+07	2.75713e+07	2.82318e+07	1.2506e+07	1.19215e+07	6.49147e+06	3.46863e+07	2.09042e+07	3.3836e+07	1.7012e+07	4.07174e+07	1.65498e+07	1.8106e+07	1.842e+07	6.09843e+06	1.84958e+07	1.17436e+07	1.2597e+07	1.03507e+07	1.58706e+07	5.63038e+06	8.97989e+06	1.05985e+07	1.10727e+07	3.40597e+07	3.45918e+07	3.13321e+07	2.02403e+07	1.66605e+07	2.0737e+07	2.03603e+07	1.88985e+07	2.02013e+07	1.42698e+07	1.42719e+07	1.66349e+07	2.15401e+07	1.72629e+07
sp1391	3.25281e+06	5.35092e+06	4.99575e+06	3.06201e+06	2.72148e+06	3.49756e+06	3.05334e+06	3.50519e+06	1.43083e+06	2.19936e+06	2.15528e+06	2.72204e+06	5.9022e+06	5.91263e+06	2.725e+06	2.4205e+06	1.42673e+06	7.15074e+06	4.43843e+06	7.40717e+06	3.50098e+06	9.18302e+06	3.77082e+06	3.34489e+06	3.82836e+06	1.34913e+06	4.31866e+06	2.50076e+06	2.54878e+06	2.26051e+06	3.68083e+06	1.11355e+06	1.90193e+06	2.33794e+06	2.36004e+06	7.77595e+06	8.49361e+06	7.30373e+06	5.28486e+06	3.69058e+06	4.63717e+06	4.44345e+06	3.86749e+06	4.67771e+06	3.5403e+06	3.15327e+06	3.6862e+06	5.36137e+06	4.30244e+06
sp1392	4.07856e+06	2.26832e+06	3.25712e+06	756185	887520	3.55209e+06	3.7149e+06	4.36262e+06	638033	2.31883e+06	492869	937578	2.63412e+06	3.07996e+06	1.52555e+06	898783	881483	1.74638e+06	2.94683e+06	4.05528e+06	3.98993e+06	3.23597e+06	2.15532e+06	2.85033e+06	2.07238e+06	1.37035e+06	5.63533e+06	1.71048e+06	2.40414e+06	5.24214e+06	5.85522e+06	375907	1.41582e+06	1.53435e+06	1.27874e+06	6.04468e+06	4.9659e+06	5.48384e+06	2.93642e+06	3.11647e+06	4.38007e+06	4.49904e+06	2.90624e+06	2.94555e+06	2.08784e+06	1.49036e+06	3.78071e+06	4.53116e+06	3.03137e+06
sp1393	4.6695e+06	2.97782e+06	4.29785e+06	849348	858328	4.16633e+06	3.64096e+06	5.01634e+06	718764	2.3607e+06	641976	961995	3.22175e+06	3.47372e+06	1.91551e+06	976535	986069	2.11619e+06	3.2296e+06	4.82456e+06	4.6229e+06	3.22451e+06	2.63845e+06	3.34237e+06	2.51691e+06	1.62534e+06	5.8009e+06	1.87728e+06	2.85681e+06	5.89943e+06	6.4427e+06	383617	1.50046e+06	1.85414e+06	1.56101e+06	6.87601e+06	5.99742e+06	5.84805e+06	3.74673e+06	3.5978e+06	5.02505e+06	5.07145e+06	3.60955e+06	3.19366e+06	2.63109e+06	1.54853e+06	4.08543e+06	4.93112e+06	3.53923e+06
sp1394	849269	562566	847867	391904	378609	819745	829611	858213	228310	611231	359675	419776	650723	770504	656063	559179	428208	504601	623711	1.0302e+06	1.02125e+06	687398	486182	769886	567452	370192	1.14307e+06	565842	534948	1.10637e+06	1.27195e+06	108923	240537	559841	321977	1.36365e+06	1.17574e+06	1.32883e+06	740722	860649	1.04032e+06	1.10128e+06	709697	763678	650522	468114	831230	1.08008e+06	712839
sp1395	4.84177e+06	5.55341e+06	6.97728e+06	5.02202e+06	5.80773e+06	2.77298e+06	2.5096e+06	1.08891e+07	2.44245e+06	7.1606e+06	6.00281e+06	3.34667e+06	1.00866e+07	9.59035e+06	5.64011e+06	5.72105e+06	7.06983e+06	6.84682e+06	8.39936e+06	1.63453e+07	3.76964e+06	6.34863e+06	5.45576e+06	8.32123e+06	3.9448e+06	2.9174e+06	1.21382e+07	7.30696e+06	5.92845e+06	8.82732e+06	1.03991e+07	2.39067e+06	3.49578e+06	7.37152e+06	3.98358e+06	1.26844e+07	1.40378e+07	1.62591e+07	1.0302e+07	8.1434e+06	1.1329e+07	8.11838e+06	6.66767e+06	1.15999e+07	7.8688e+06	6.21472e+06	9.89313e+06	1.10942e+07	9.74019e+06
sp1396	8.78842e+06	1.02592e+07	1.42677e+07	6.94028e+06	5.97895e+06	1.0506e+07	1.1773e+07	2.47125e+07	2.20781e+06	1.25583e+07	4.76075e+06	7.40225e+06	1.50793e+07	1.65846e+07	2.16266e+07	3.44748e+06	5.70086e+06	9.55807e+06	1.10639e+07	2.05325e+07	2.32513e+07	2.4901e+07	1.37989e+07	1.44185e+07	1.27105e+07	7.25196e+06	2.33467e+07	3.11008e+07	9.067e+06	1.31731e+07	1.39312e+07	3.00522e+06	7.697e+06	6.94693e+06	8.08537e+06	2.21159e+07	2.02437e+07	2.58442e+07	2.05374e+07	1.83252e+07	1.53254e+07	2.38954e+07	2.08709e+07	2.32859e+07	1.57359e+07	1.20251e+07	1.42381e+07	2.11261e+07	1.96805e+07
sp1398	1.43079e+07	2.55893e+07	1.95899e+07	1.50925e+07	1.55984e+07	1.7203e+07	1.74896e+07	2.549e+07	1.02464e+07	1.89099e+07	1.14956e+07	1.24647e+07	2.41285e+07	2.61323e+07	1.13319e+07	1.16755e+07	5.89878e+06	2.30336e+07	2.33972e+07	3.36247e+07	2.5733e+07	3.16487e+07	2.40826e+07	2.02144e+07	1.58075e+07	6.90393e+06	1.94044e+07	1.43287e+07	1.76473e+07	1.34988e+07	1.92761e+07	8.33383e+06	1.03945e+07	1.35748e+07	1.34585e+07	2.46934e+07	2.67057e+07	2.42418e+07	2.04264e+07	1.74537e+07	2.198e+07	2.31233e+07	2.33278e+07	2.27524e+07	1.64482e+07	1.80745e+07	1.89463e+07	1.83642e+07	1.3856e+07
sp1399	783813	393802	765183	248960	202323	841870	796605	744671	206295	644362	209108	193399	571947	679552	310653	281967	332040	799546	547917	1.10226e+06	660600	537853	768626	716604	322336	250995	498116	281127	636607	530120	612968	82310.4	399036	351812	189916	797428	1.12788e+06	986974	828887	686577	1.26283e+06	1.02842e+06	1.11143e+06	988211	941886	867342	990037	1.14655e+06	814474
sp1400	672018	609754	763858	249544	202208	725476	719340	623672	189316	591027	146028	248122	585689	737086	229650	351571	403662	770525	685953	1.11777e+06	633910	532513	588136	746999	378728	266260	511405	254803	780711	786263	708677	100767	311421	277291	219881	788949	1.08602e+06	1.27546e+06	1.0737e+06	666588	1.19479e+06	955504	973791	1.16682e+06	894558	768809	1.02993e+06	1.10058e+06	833154
sp1401	558588	677792	678533	701694	703800	480396	383371	806959	384961	576701	715046	1.22921e+06	735005	628394	602749	933023	755725	1.05369e+06	954442	1.13352e+06	549365	1.07066e+06	541635	587598	801280	505737	1.00039e+06	917866	586821	591259	540331	289493	442749	918763	479139	1.03908e+06	1.20667e+06	1.12195e+06	984921	764655	798039	659361	765066	1.09367e+06	778090	742804	635404	905565	686237
sp1402	1.07199e+06	1.58004e+06	1.60552e+06	770703	883251	1.55946e+06	1.19539e+06	2.28935e+06	718606	1.79551e+06	793619	1.4212e+06	1.86491e+06	1.88552e+06	1.00292e+06	958556	1.15411e+06	1.99888e+06	2.36867e+06	3.02405e+06	2.26531e+06	3.32739e+06	1.79696e+06	1.61104e+06	1.87153e+06	501252	3.1292e+06	1.76339e+06	1.42959e+06	1.31945e+06	1.79389e+06	648526	743218	1.753e+06	973888	3.13692e+06	3.18014e+06	4.01334e+06	2.72918e+06	2.03609e+06	2.10092e+06	2.54462e+06	2.07622e+06	3.00024e+06	2.11776e+06	1.92115e+06	1.7441e+06	2.32802e+06	1.57465e+06
sp1403	1.24054e+06	3.65016e+06	2.18426e+06	2.03902e+06	1.81477e+06	1.24972e+06	1.30885e+06	2.16557e+06	907499	1.30217e+06	1.58749e+06	1.599e+06	3.09605e+06	3.31139e+06	1.43043e+06	1.78392e+06	762875	2.60205e+06	2.32742e+06	4.20472e+06	2.70091e+06	4.89932e+06	1.85803e+06	2.06919e+06	1.57669e+06	430581	2.51412e+06	2.31942e+06	1.76456e+06	859216	1.60994e+06	1.18537e+06	1.0729e+06	1.84927e+06	1.38173e+06	3.26097e+06	3.70617e+06	3.50933e+06	2.44498e+06	2.03678e+06	2.70564e+06	2.52133e+06	2.10642e+06	3.68915e+06	2.02133e+06	2.5027e+06	1.96975e+06	2.384e+06	1.38942e+06
sp1405	1.31481e+07	7.59684e+06	1.43952e+07	1.99923e+06	3.82319e+06	9.39193e+06	1.48362e+07	1.87091e+07	2.13666e+06	1.16614e+07	1.25645e+06	3.0017e+06	7.76149e+06	8.0138e+06	2.64989e+06	2.23909e+06	3.48671e+06	8.45075e+06	6.17251e+06	9.08187e+06	9.14704e+06	6.41235e+06	7.50561e+06	6.84517e+06	5.80549e+06	3.19236e+06	1.56269e+07	5.21018e+06	9.7307e+06	1.08642e+07	1.26704e+07	731920	3.58883e+06	5.37073e+06	2.16893e+06	1.90326e+07	1.72635e+07	1.85838e+07	1.70973e+07	1.06317e+07	1.8147e+07	1.7615e+07	1.19753e+07	7.25415e+06	7.27484e+06	4.4599e+06	1.52622e+07	1.98144e+07	1.15337e+07
sp1406	1.4449e+07	8.56384e+06	1.59531e+07	1.84549e+06	1.99984e+06	1.44677e+07	1.60183e+07	2.69574e+07	1.99839e+06	1.25284e+07	1.77377e+06	1.81576e+06	9.4524e+06	1.02417e+07	2.64183e+06	2.79039e+06	2.24909e+06	9.27641e+06	9.27384e+06	1.31368e+07	1.03855e+07	9.39677e+06	1.1492e+07	9.03922e+06	8.78222e+06	4.08284e+06	1.74473e+07	5.10682e+06	1.04726e+07	1.17214e+07	1.40488e+07	816912	4.22571e+06	5.74719e+06	2.29729e+06	2.0538e+07	2.09325e+07	1.9046e+07	1.93549e+07	1.19979e+07	1.96384e+07	1.74657e+07	1.29213e+07	8.81863e+06	7.94597e+06	5.03494e+06	1.69271e+07	2.09474e+07	1.11539e+07
sp1407	1.31928e+07	1.21816e+07	1.64669e+07	3.41425e+06	4.47682e+06	1.53772e+07	1.28226e+07	2.10386e+07	2.96846e+06	1.24851e+07	3.31194e+06	3.88995e+06	1.51009e+07	1.3783e+07	4.49568e+06	3.57291e+06	5.12621e+06	1.48132e+07	1.24719e+07	2.22444e+07	1.55094e+07	1.82476e+07	1.44672e+07	1.40328e+07	9.56882e+06	4.5808e+06	1.72951e+07	6.93661e+06	8.90189e+06	1.51857e+07	2.11353e+07	1.62009e+06	6.66277e+06	7.12559e+06	4.83916e+06	1.69425e+07	1.82829e+07	2.04872e+07	1.49321e+07	1.10617e+07	1.93865e+07	1.72798e+07	1.55227e+07	1.43393e+07	1.15369e+07	8.2528e+06	1.52582e+07	1.49475e+07	1.24376e+07
sp1409	1.49172e+06	2.42034e+06	2.7254e+06	1.4244e+06	1.37035e+06	1.72057e+06	1.18498e+06	2.8259e+06	1.35894e+06	3.00651e+06	1.45618e+06	2.87141e+06	2.71565e+06	2.65179e+06	1.9204e+06	1.49081e+06	3.06241e+06	2.47337e+06	2.93748e+06	4.90817e+06	3.02478e+06	3.43602e+06	2.64499e+06	2.47217e+06	2.12416e+06	518361	3.17029e+06	2.53994e+06	1.88584e+06	1.35511e+06	1.9834e+06	1.10802e+06	922119	2.61366e+06	1.20549e+06	2.43146e+06	3.486e+06	4.01948e+06	3.24028e+06	2.56633e+06	2.34166e+06	2.87068e+06	2.50947e+06	3.76871e+06	2.62166e+06	2.57669e+06	2.1083e+06	1.81349e+06	2.01808e+06
sp141	671405	777881	991496	3.03519e+06	5.21823e+06	610884	345773	1.43191e+06	1.39306e+06	549032	3.54301e+06	6.62865e+06	1.46438e+06	1.16689e+06	4.15807e+06	811790	1.65211e+06	478632	1.31353e+06	921874	1.34723e+06	1.18294e+07	602112	1.05392e+06	2.01163e+06	463368	913536	2.77997e+06	1.88088e+06	716830	723330	8.3061e+06	244173	2.19551e+06	2.93705e+06	1.15968e+06	1.12437e+06	494533	550432	543261	722843	834165	422265	498254	798913	871153	1.01766e+06	373507	316745
sp1411	1.37459e+06	2.62527e+06	3.72912e+06	4.13888e+06	3.69895e+06	2.02846e+06	1.77144e+06	3.60275e+06	2.11544e+06	4.09771e+06	3.91301e+06	6.84896e+06	4.22657e+06	4.34548e+06	4.77286e+06	3.54672e+06	5.92686e+06	3.33591e+06	3.20149e+06	7.63643e+06	3.45595e+06	3.73987e+06	3.0418e+06	3.76771e+06	2.33559e+06	421004	3.7681e+06	5.31652e+06	2.15541e+06	2.18476e+06	2.72893e+06	1.58447e+06	1.11453e+06	4.58305e+06	1.63755e+06	3.50339e+06	5.67537e+06	5.5728e+06	3.57314e+06	3.26367e+06	3.473e+06	3.26071e+06	2.65482e+06	5.46806e+06	3.19128e+06	3.02779e+06	2.88352e+06	2.85674e+06	1.66182e+06
sp1413	3.00994e+06	7.99706e+06	3.48871e+06	4.02234e+06	4.64761e+06	4.46738e+06	4.2163e+06	8.69101e+06	2.12154e+06	5.56237e+06	5.0546e+06	4.09317e+06	7.4325e+06	8.27031e+06	2.76494e+06	3.06034e+06	2.07329e+06	4.20938e+06	5.57727e+06	9.64169e+06	7.15316e+06	7.10004e+06	7.21418e+06	4.54376e+06	3.80403e+06	829862	6.17143e+06	3.9526e+06	5.45634e+06	1.5792e+06	3.18981e+06	2.51428e+06	2.74725e+06	3.98824e+06	3.29529e+06	4.17995e+06	5.98324e+06	4.30025e+06	4.954e+06	4.49006e+06	4.52921e+06	5.25326e+06	4.83139e+06	3.36408e+06	3.28453e+06	3.37003e+06	4.01373e+06	3.86067e+06	2.30127e+06
sp1415	9.88968e+07	1.31881e+08	1.49955e+08	1.13126e+08	1.04794e+08	1.27724e+08	1.08074e+08	1.80558e+08	1.05204e+08	1.86482e+08	1.13063e+08	1.70926e+08	1.73245e+08	1.7447e+08	1.19164e+08	9.8798e+07	1.71243e+08	1.42232e+08	1.64203e+08	1.93346e+08	1.72645e+08	1.91418e+08	1.55686e+08	1.52387e+08	1.3628e+08	4.1509e+07	1.51445e+08	1.50139e+08	1.15016e+08	9.37317e+07	1.21753e+08	8.91424e+07	7.25482e+07	1.5996e+08	8.73183e+07	1.56437e+08	2.0936e+08	2.09982e+08	1.69666e+08	1.42407e+08	1.85584e+08	1.63553e+08	1.5869e+08	2.1391e+08	1.70037e+08	1.44858e+08	1.34703e+08	1.49739e+08	1.30458e+08
sp1416	623533	1.50567e+06	1.17801e+06	471402	542519	1.0783e+06	821158	2.16396e+06	500675	838489	329663	445783	897820	972448	920284	527455	349040	761112	688779	1.61692e+06	1.03564e+06	1.49358e+06	792964	842745	417742	218512	1.17378e+06	724112	746294	664376	1.69824e+06	160696	513111	749847	493971	2.04792e+06	1.7261e+06	1.55605e+06	952213	882547	1.47321e+06	1.47271e+06	1.00155e+06	1.14301e+06	844528	771805	1.38769e+06	1.15556e+06	607211
sp1417	1.02168e+06	3.2176e+06	2.13174e+06	2.18272e+06	2.02127e+06	1.73853e+06	1.42998e+06	3.39138e+06	2.22889e+06	2.77865e+06	1.58667e+06	3.23459e+06	2.19931e+06	1.93451e+06	2.65219e+06	1.96252e+06	2.13247e+06	1.90676e+06	2.17858e+06	4.03964e+06	2.30562e+06	3.4774e+06	2.13636e+06	2.08039e+06	1.13098e+06	359572	1.91417e+06	3.06005e+06	2.23133e+06	905754	1.74923e+06	1.37327e+06	927734	2.48119e+06	1.6719e+06	2.87133e+06	3.39046e+06	3.72021e+06	2.45829e+06	1.91724e+06	2.6416e+06	1.47999e+06	1.35549e+06	3.25159e+06	1.97656e+06	2.00479e+06	2.39106e+06	1.89115e+06	1.02028e+06
sp1421	82495.6	318408	57270.1	426542	364778	168780	107308	91733.8	158868	35709.4	258427	252960	70087.6	63732.4	375674	699459	108280	73890.5	50137	61584.7	78679.9	34496.5	32127.2	37595.5	1932.72	9007.12	28238.4	632141	325893	83397.8	29679.7	351645	30188.8	409553	214198	169485	443081	389550	325110	596323	489528	611885	425698	278515	286562	395487	245486	221620	105819
sp143	2.55206e+06	3.51661e+06	2.38885e+06	4.0512e+06	3.25771e+06	3.42397e+06	5.6976e+06	6.41408e+06	4.51641e+06	2.73689e+06	2.33769e+07	2.25964e+07	5.8181e+06	5.66991e+06	5.42173e+06	5.35165e+06	4.67917e+06	3.47903e+06	3.3155e+06	4.31832e+06	4.03555e+06	2.09126e+06	3.76257e+06	8.89918e+06	1.46555e+07	3.09706e+06	3.97442e+06	3.10117e+06	4.85422e+06	1.98051e+06	1.90641e+06	3.7241e+06	2.16824e+06	3.02184e+06	2.17555e+06	3.48812e+06	5.12341e+06	5.88572e+06	2.88035e+06	7.48281e+06	5.13263e+06	1.13267e+07	2.94471e+06	6.92518e+06	8.34298e+06	6.09443e+06	7.85613e+06	7.28916e+06	1.88379e+06
sp1431	64039	85640.4	53344.2	36032.9	35716.3	64440.6	75886.6	94283.3	29862.9	49715.8	22212.6	31319.8	69528.7	85856.6	53756	33106.4	29285	46653	56971	105213	53183.4	96615.9	23246.8	68126.9	58010.2	24596.6	63964.3	26981.4	44274.8	20138.7	42307.5	31075.1	41148.3	43094.4	34193.5	64980.7	28123.2	66529.5	36014.6	52781.9	63432.7	25188	47792.5	37094.9	35663.1	53503.8	48247.8	28894.7	30275.8
sp1435	528937	212848	442552	507374	192438	493861	456401	379928	185100	694796	319644	310477	1.1919e+06	1.00609e+06	437451	947820	990873	743899	877081	682677	781238	835061	299366	883934	384627	938826	988489	628928	1.57937e+06	918810	878000	973119	453279	755635	1.06582e+06	1.49129e+06	1.64818e+06	1.3819e+06	1.19625e+06	1.1978e+06	1.19589e+06	1.24408e+06	1.256e+06	1.25084e+06	1.083e+06	1.0025e+06	1.00667e+06	1.12424e+06	1.19434e+06
sp1436	3.5573e+06	3.54114e+06	6.47199e+06	988108	810819	3.46608e+06	4.95046e+06	4.63993e+06	936567	4.41686e+06	531762	762012	5.86078e+06	6.19223e+06	1.51414e+06	1.16344e+06	945025	4.20354e+06	3.79649e+06	3.75373e+06	4.72125e+06	3.89253e+06	3.54489e+06	5.09987e+06	3.76742e+06	1.72798e+06	4.52948e+06	947030	2.87966e+06	5.02879e+06	5.7959e+06	389975	1.48717e+06	1.09361e+06	1.72395e+06	4.70991e+06	5.31814e+06	5.81577e+06	4.61365e+06	3.61604e+06	3.07058e+06	5.03312e+06	4.05089e+06	3.36507e+06	2.92613e+06	2.11833e+06	4.11149e+06	4.36517e+06	3.58824e+06
sp1437	1.37953e+06	1.32038e+06	2.68186e+06	614848	529938	1.2402e+06	1.96592e+06	1.59491e+06	415785	1.63118e+06	478863	530582	2.26584e+06	2.62669e+06	765291	735241	515843	1.81171e+06	1.42727e+06	1.63978e+06	1.71928e+06	1.62391e+06	1.446e+06	2.00326e+06	1.51493e+06	791217	1.89649e+06	408629	1.30171e+06	2.13596e+06	2.62548e+06	167679	637930	480998	663183	1.88782e+06	2.13693e+06	2.31863e+06	1.91263e+06	1.45646e+06	1.31413e+06	2.04011e+06	1.58294e+06	1.45242e+06	1.17961e+06	812560	1.57413e+06	1.83693e+06	1.35044e+06
sp1438	8.47517e+06	1.49677e+07	9.90486e+06	7.30998e+06	7.12996e+06	1.11339e+07	9.56537e+06	1.51784e+07	4.46615e+06	9.84046e+06	6.03334e+06	6.4347e+06	1.48102e+07	1.62409e+07	6.30855e+06	5.88556e+06	2.62083e+06	1.20138e+07	1.34275e+07	2.1045e+07	1.51946e+07	1.54608e+07	1.38504e+07	1.04142e+07	1.0101e+07	3.54365e+06	1.48399e+07	1.05851e+07	8.6495e+06	8.2049e+06	1.11614e+07	3.68552e+06	4.34634e+06	8.93999e+06	6.2213e+06	1.42987e+07	1.74997e+07	1.5265e+07	1.31546e+07	1.0523e+07	1.22932e+07	1.3142e+07	1.25164e+07	1.4383e+07	1.03925e+07	9.50375e+06	1.03557e+07	9.81357e+06	8.00226e+06
sp1439	3.69488e+06	4.06493e+06	5.1491e+06	4.41412e+06	4.33781e+06	3.85904e+06	3.87938e+06	8.47289e+06	1.80496e+06	6.93607e+06	5.59185e+06	5.30135e+06	8.00839e+06	7.50692e+06	4.15612e+06	4.32067e+06	5.70975e+06	5.41203e+06	6.68535e+06	1.26765e+07	7.44018e+06	8.24044e+06	5.28121e+06	6.66208e+06	4.82557e+06	2.19557e+06	1.07767e+07	6.53735e+06	4.30225e+06	7.3294e+06	8.98497e+06	2.14543e+06	3.10363e+06	5.79552e+06	3.49231e+06	9.40911e+06	1.14521e+07	1.37581e+07	6.65961e+06	5.77328e+06	9.00296e+06	6.51831e+06	5.35274e+06	8.09313e+06	6.36157e+06	3.95041e+06	8.69201e+06	8.8834e+06	7.95426e+06
sp1440	328171	786932	530787	538764	481322	418506	329713	584949	199096	331523	366527	387313	1.01531e+06	932844	343009	327456	181723	698389	815852	1.29852e+06	729487	1.21732e+06	657637	521364	399233	132815	635304	649382	467010	316664	431732	235657	323947	443695	406246	944986	1.25793e+06	1.12791e+06	727093	504201	542339	499979	629878	891216	376663	610143	379893	625329	375991
sp1442	486871	750730	734018	404034	331832	507933	475892	1.04755e+06	306727	734023	342049	769127	852097	884639	508721	394831	592454	880571	939089	1.17854e+06	1.07468e+06	1.27769e+06	709008	807019	831116	183830	1.34618e+06	636102	603075	527126	670397	320537	350368	715694	378842	1.39382e+06	1.59635e+06	1.76985e+06	1.05341e+06	994479	896922	1.17458e+06	937713	1.46186e+06	905146	934536	1.04593e+06	924711	735935
sp1444	2.74239e+06	4.74338e+06	4.6553e+06	3.57065e+06	3.55342e+06	4.06026e+06	3.71588e+06	6.10354e+06	3.27072e+06	7.36088e+06	3.74671e+06	7.37478e+06	5.51945e+06	6.14036e+06	3.769e+06	2.93083e+06	6.688e+06	7.04582e+06	6.65779e+06	1.0682e+07	6.44369e+06	8.13501e+06	5.70873e+06	5.22304e+06	5.23654e+06	1.09749e+06	7.52487e+06	6.09522e+06	4.06707e+06	3.19996e+06	4.29823e+06	2.81705e+06	1.87368e+06	6.59494e+06	2.84999e+06	6.52464e+06	8.79951e+06	8.67071e+06	7.39821e+06	5.25612e+06	5.73539e+06	6.47203e+06	5.24715e+06	8.44824e+06	5.38224e+06	5.3836e+06	5.76888e+06	4.79166e+06	3.92022e+06
sp1445	1.82533e+07	1.48079e+07	2.21861e+07	4.70145e+06	5.48357e+06	2.00717e+07	1.80256e+07	2.56939e+07	4.04604e+06	1.64023e+07	3.59308e+06	5.38607e+06	2.01543e+07	2.18596e+07	6.58706e+06	4.95106e+06	6.98766e+06	1.90894e+07	1.96423e+07	3.09721e+07	2.07405e+07	2.33147e+07	1.54258e+07	1.7069e+07	1.40286e+07	7.00123e+06	2.24047e+07	8.93117e+06	1.27609e+07	1.77826e+07	2.73487e+07	2.12699e+06	7.8303e+06	9.43273e+06	7.77601e+06	2.61284e+07	2.79397e+07	2.68447e+07	1.6303e+07	1.80986e+07	2.56164e+07	2.37382e+07	1.86029e+07	1.67263e+07	1.3922e+07	1.05772e+07	1.60483e+07	1.97333e+07	1.64207e+07
sp1446	2.68586e+07	1.63306e+07	2.75534e+07	8.37379e+06	9.38571e+06	2.40847e+07	2.9574e+07	4.40747e+07	5.60635e+06	2.2096e+07	9.16938e+06	8.18541e+06	1.81572e+07	2.07478e+07	1.36427e+07	1.44771e+07	9.27333e+06	1.7098e+07	1.55389e+07	2.24358e+07	1.76092e+07	1.53129e+07	2.07219e+07	1.77044e+07	1.65342e+07	8.7409e+06	3.17263e+07	1.53402e+07	2.22202e+07	2.0633e+07	2.54533e+07	2.39419e+06	1.00482e+07	1.63697e+07	4.80208e+06	3.92353e+07	3.87619e+07	3.87198e+07	3.65413e+07	2.48732e+07	3.61168e+07	3.61135e+07	2.18085e+07	1.95087e+07	1.81945e+07	1.48432e+07	3.11458e+07	3.69698e+07	2.26544e+07
sp1449	121631	272689	213606	81051.6	80034.5	168695	93991.2	415173	98346.5	203116	62343.7	87969.4	183575	218389	169094	94865	82015.2	143791	174474	302237	207131	342583	210899	182851	108201	53487.9	241415	184119	83682.4	149225	272110	13069.5	133818	121708	116708	381175	381166	378099	216689	212296	333018	298650	235870	274943	157761	150516	250940	227730	195170
sp1452	3.33642e+06	3.93401e+06	2.54834e+06	1.4386e+06	1.94011e+06	1.62784e+06	3.50722e+06	3.47538e+06	1.49545e+06	4.84987e+06	1.27667e+06	4.73655e+06	2.74151e+06	8.23074e+06	2.23188e+06	492028	501717	5.51242e+06	5.38853e+06	2.88399e+06	5.17138e+06	6.76611e+06	6.02613e+06	5.91731e+06	3.3046e+06	2.50699e+06	5.34213e+06	3.28667e+06	8.01482e+06	1.97743e+06	5.87169e+06	1.57853e+06	1.43484e+06	3.78339e+06	1.50958e+06	7.25091e+06	7.85649e+06	3.61327e+06	3.38987e+06	5.30578e+06	7.03397e+06	2.94541e+06	6.06083e+06	3.24743e+06	6.70767e+06	8.47841e+06	2.79083e+06	6.16728e+06	2.36113e+06
sp1453	1.20615e+06	1.65335e+06	1.68924e+06	577760	1.02333e+06	1.72748e+06	625351	2.28023e+06	929017	1.98396e+06	696517	1.08992e+06	2.79454e+06	1.73822e+06	302145	1.02549e+06	376052	2.14228e+06	1.75137e+06	3.55306e+06	2.13738e+06	2.14376e+06	1.78722e+06	856119	1.2063e+06	467584	1.53731e+06	895529	1.5917e+06	869078	1.16485e+06	116559	330314	1.28203e+06	960428	1.55831e+06	2.83066e+06	2.07342e+06	1.20692e+06	1.35269e+06	2.66739e+06	2.59401e+06	2.13619e+06	1.97784e+06	1.364e+06	513204	1.71898e+06	2.58188e+06	1.00329e+06
sp1454	643269	440345	862737	768515	498999	892098	444516	636158	482231	904680	591536	1.61614e+06	710349	673579	646864	500635	981369	719706	511875	2.14521e+06	623208	799358	628216	801434	388639	125741	668927	784237	814522	622039	633128	355179	321607	996050	296255	689248	1.55898e+06	1.28328e+06	1.45683e+06	742631	1.03854e+06	1.03579e+06	792829	1.30305e+06	1.10763e+06	1.01783e+06	831743	528269	624682
sp1455	158881	195217	639214	373363	521931	274289	222966	232732	363572	522969	570496	1.04574e+06	401089	502917	193587	266183	601547	349638	385617	944468	172767	261612	321074	502204	290891	40665.5	294957	442854	404086	322529	337566	282758	150001	712744	280125	201077	468689	805015	252523	367219	220330	345050	223766	334567	832331	346897	293377	260468	168822
sp1456	2.6089e+06	1.87177e+06	3.88597e+06	1.76668e+06	2.07721e+06	4.52859e+06	2.45257e+06	3.52945e+06	1.08016e+06	2.3841e+06	1.54942e+06	2.6779e+06	4.09727e+06	3.96866e+06	2.5251e+06	2.81676e+06	2.46239e+06	1.48736e+06	3.48829e+06	1.04732e+07	4.36672e+06	3.73675e+06	3.61827e+06	4.796e+06	1.67101e+06	950094	2.82812e+06	1.66969e+06	3.71883e+06	1.7672e+06	7.31445e+06	626567	1.68413e+06	970398	571855	4.27488e+06	8.53717e+06	8.26584e+06	7.27143e+06	3.21233e+06	5.07137e+06	3.14379e+06	3.67461e+06	3.30182e+06	2.888e+06	1.66072e+06	3.93921e+06	4.71212e+06	2.33694e+06
sp1457	206674	95850.6	182350	84697.3	46789.6	226972	168187	177344	37817.8	177181	59776.2	82772.5	153969	188433	67941.1	63441.7	96916.2	218429	201928	387594	184877	111608	212949	232678	63825.1	62694.3	203427	47742.3	206556	185723	272633	32655	95745.2	80156.4	63567.4	224668	354416	317058	285718	193487	352974	297820	256254	290603	301205	227619	260965	254326	201322
sp1458	196828	115027	362928	142018	341372	429067	471358	195375	473352	573233	596625	242196	470010	287973	407539	536676	188181	174350	227338	179676	522503	526923	265690	312752	541058	294925	295964	579846	647717	279901	213332	281607	501330	424166	182866	327802	253686	461463	548346	597852	328202	604229	312868	189529	216994	158418	558682	512407	358205
sp1459	162833	414879	209144	339479	288342	191684	126212	225803	708305	152535	365326	567853	249418	291185	448421	543442	140019	371013	219263	122680	162902	354072	172383	140581	179488	220483	155419	537793	343738	147843	170787	373675	108492	475149	407013	200955	177767	122897	150451	126153	112777	136124	171195	147717	131399	156618	143605	126425	122748
sp146	12359.9	23758.2	11975.8	41978.3	41827.8	30403.8	37967.1	79364.7	47808	19879.7	266131	212219	28899.1	59773.4	35882.3	38748.8	48795.3	26876.4	17319.9	68003.9	24513.8	16140.5	34786.7	114954	164596	22114	52242.7	27567.3	40873.6	15900.3	9928.35	43575.7	25250.5	38327.8	30172.1	43921.4	59414.9	53019.8	25797.9	79728.1	43908.1	121414	32973.7	60575.9	91827	86717.6	75813.1	72002.3	10173.4
sp1464	1.20464e+07	2.87186e+07	1.73473e+07	4.34576e+07	3.28805e+07	1.30871e+07	1.48355e+07	2.51338e+07	3.87819e+07	2.02881e+07	3.77157e+07	3.99721e+07	2.08402e+07	1.87988e+07	4.30254e+07	4.05967e+07	4.39258e+07	1.83468e+07	2.01913e+07	1.53898e+07	2.35041e+07	3.09481e+07	2.12221e+07	1.78763e+07	2.17385e+07	1.85172e+07	2.6074e+07	4.44204e+07	2.79868e+07	1.62174e+07	1.56728e+07	4.10582e+07	1.62306e+07	3.9498e+07	3.77335e+07	1.92009e+07	1.58465e+07	1.48273e+07	1.69159e+07	1.7674e+07	1.66382e+07	1.92748e+07	2.16052e+07	1.98422e+07	1.8011e+07	2.05989e+07	1.94825e+07	1.79437e+07	1.7681e+07
sp1472	1.75985e+07	2.97508e+07	2.80005e+07	2.83499e+07	3.5718e+07	2.91841e+07	2.79638e+07	6.91125e+07	1.94724e+07	2.45473e+07	4.91178e+07	3.10667e+07	3.28468e+07	4.17785e+07	3.60578e+07	4.95899e+07	2.86372e+07	2.45971e+07	2.13335e+07	4.16144e+07	2.78036e+07	3.79027e+07	2.72309e+07	2.32008e+07	5.01711e+07	4.51177e+07	4.09253e+07	2.18532e+07	3.16505e+07	2.69535e+07	2.22003e+07	1.68623e+07	2.81236e+07	2.14554e+07	2.27085e+07	3.46497e+07	4.24807e+07	3.20475e+07	3.30384e+07	4.07576e+07	3.51597e+07	3.93125e+07	3.40744e+07	1.94366e+07	3.36435e+07	1.58333e+07	3.85286e+07	3.57327e+07	2.89261e+07
sp1476	1.60268e+06	2.19605e+06	1.43118e+06	2.69553e+06	2.06157e+06	1.76745e+06	3.40984e+06	3.71466e+06	2.60176e+06	1.66567e+06	1.33117e+07	1.4142e+07	3.6077e+06	3.28188e+06	3.49379e+06	3.2335e+06	2.84405e+06	2.1423e+06	2.0547e+06	2.60353e+06	2.41626e+06	1.17805e+06	2.51429e+06	5.11613e+06	9.64858e+06	2.0144e+06	2.45638e+06	1.80627e+06	2.95567e+06	1.10731e+06	1.22857e+06	2.29046e+06	1.33766e+06	1.78973e+06	1.55562e+06	2.11756e+06	3.03326e+06	3.38056e+06	1.69745e+06	4.72074e+06	3.26063e+06	7.80775e+06	1.82625e+06	4.39754e+06	5.35904e+06	3.94884e+06	4.66473e+06	4.85504e+06	1.13895e+06
sp1477	12007.9	63961.2	34388	117026	214673	71455.4	26961.6	29340.9	96726.6	31335.1	1.26217e+06	190662	153882	63790.3	124463	106342	80360.5	28031.5	14497.8	123142	153313	43690.8	282773	91774.8	154513	53312.9	255602	37040	77776.3	24350.8	56123.8	63953.7	18963.5	46298.2	87052.1	53207.5	59090.8	56268.9	13318.1	42706.9	35780.3	130191	34908	67256.7	152522	81646.2	100284	85777.6	34578.7
sp1479	4.72132e+06	6.9364e+06	2.72022e+06	5.85767e+06	8.22669e+06	7.81565e+06	8.44906e+06	4.29806e+06	1.31495e+07	6.58516e+06	5.96001e+06	7.80998e+06	5.59688e+06	9.13032e+06	1.21475e+07	8.69373e+06	3.24149e+06	3.66469e+06	2.91542e+06	2.1924e+06	5.29565e+06	2.95391e+06	1.02497e+07	5.41973e+06	8.04155e+06	3.93435e+06	4.81347e+06	7.5534e+06	1.37739e+07	5.91646e+06	4.266e+06	8.00802e+06	3.21743e+06	6.49308e+06	7.11569e+06	4.92789e+06	7.78567e+06	5.37232e+06	5.07382e+06	6.04247e+06	7.414e+06	1.53681e+07	3.07829e+06	6.99966e+06	5.88211e+06	7.37361e+06	7.10472e+06	4.11784e+06	5.21805e+06
sp148	239835	149904	100370	4.31374e+06	4.52072e+06	240594	180827	4.14146e+06	5.63369e+06	262861	4.28219e+06	193772	3.13444e+06	2.70822e+06	5.64792e+06	3.40491e+06	3.11018e+06	83673.1	74697.7	107882	113960	137879	176981	105339	106075	259713	281355	216620	295097	356190	152555	216139	213992	237603	4.21982e+06	175055	227408	217060	166919	296740	230468	255796	189137	238642	309622	358600	173937	181326	232219
sp1480	5.82379e+06	1.47712e+06	1.32597e+06	6.21731e+06	5.06198e+06	7.48785e+06	1.39128e+06	663525	872636	8.69504e+06	7.17505e+06	4.92686e+06	7.54573e+06	7.06428e+06	7.20462e+06	3.47199e+06	1.08839e+06	7.39715e+06	824105	7.45551e+06	917066	962422	1.25851e+06	2.59115e+06	1.47686e+06	1.14211e+06	976482	1.00606e+06	1.04518e+06	3.10771e+06	747556	2.07799e+06	2.61323e+06	966858	1.1052e+06	879641	1.90746e+06	1.61923e+06	1.39858e+06	1.52525e+06	1.29587e+06	1.37636e+06	905040	1.32269e+06	1.90284e+06	1.91239e+06	1.23038e+06	1.1542e+06	707992
sp1481	2.5033e+07	2.80595e+07	2.37486e+07	1.38233e+07	2.48315e+07	2.59567e+07	2.54714e+07	2.59572e+07	1.10492e+07	2.23575e+07	2.58524e+07	2.72908e+07	2.11295e+07	2.28514e+07	5.08533e+07	1.63136e+07	2.7738e+07	3.88221e+07	3.22598e+07	1.86056e+07	1.74741e+07	2.18932e+07	3.0628e+07	5.47848e+07	3.1443e+07	3.05788e+07	3.91736e+07	2.74804e+07	7.45475e+07	2.14796e+07	2.02909e+07	6.28929e+07	2.13479e+07	4.14045e+07	2.1122e+07	6.47771e+07	4.26922e+07	4.47245e+07	8.02904e+07	3.86683e+07	4.19989e+07	4.97818e+07	4.2535e+07	2.98103e+07	3.10177e+07	3.1926e+07	8.24295e+07	6.08887e+07	5.4193e+07
sp1482	5.87629e+07	8.69249e+07	4.87701e+07	5.23829e+07	8.18969e+07	7.67009e+07	6.59081e+07	6.24231e+07	6.88596e+07	6.51594e+07	1.21856e+08	1.0547e+08	6.50855e+07	6.49889e+07	1.85628e+08	8.3322e+07	5.30985e+07	7.00157e+07	6.65608e+07	4.82407e+07	4.8392e+07	6.41044e+07	8.48943e+07	4.9211e+07	8.27232e+07	7.61999e+07	1.21986e+08	7.03157e+07	8.65894e+07	5.08476e+07	4.93916e+07	1.20584e+08	4.03227e+07	6.74377e+07	4.4503e+07	1.03451e+08	1.09437e+08	1.1775e+08	8.77814e+07	7.63247e+07	1.02479e+08	8.10915e+07	7.54209e+07	9.42396e+07	1.16344e+08	8.89381e+07	1.12934e+08	5.9423e+07	4.35495e+07
sp1483	2.34299e+07	3.13106e+07	4.59577e+07	4.82796e+07	2.55222e+07	3.11055e+07	5.20219e+07	4.96945e+07	3.75635e+07	2.78715e+07	1.66286e+08	1.64893e+08	4.75728e+07	4.23774e+07	4.97874e+07	3.1162e+07	4.53981e+07	3.21792e+07	2.49799e+07	4.61497e+07	3.3068e+07	2.18474e+07	3.4915e+07	6.4963e+07	7.88808e+07	3.85555e+07	2.80042e+07	2.25206e+07	6.15548e+07	2.11472e+07	2.293e+07	3.57747e+07	2.78315e+07	2.15487e+07	2.15372e+07	2.85903e+07	3.35788e+07	2.96001e+07	2.63143e+07	4.30585e+07	3.65583e+07	5.76151e+07	2.83823e+07	4.6275e+07	5.31356e+07	3.86572e+07	4.64107e+07	5.18408e+07	1.57824e+07
sp1485	2.53875e+07	3.52126e+07	4.94497e+07	5.47439e+07	2.814e+07	3.4503e+07	6.21326e+07	5.77153e+07	4.02387e+07	3.20587e+07	1.72156e+08	1.81e+08	5.11393e+07	4.58537e+07	5.38961e+07	3.22365e+07	5.2145e+07	3.56864e+07	2.76537e+07	5.02527e+07	3.61808e+07	2.41142e+07	3.85875e+07	7.24026e+07	8.73232e+07	4.20742e+07	3.10385e+07	2.60744e+07	6.88381e+07	2.41362e+07	2.57691e+07	4.06793e+07	3.05705e+07	2.31141e+07	2.35227e+07	3.02189e+07	3.81232e+07	3.14868e+07	2.92692e+07	4.76038e+07	4.13685e+07	6.21671e+07	3.03084e+07	4.83484e+07	5.51459e+07	4.09035e+07	4.73123e+07	5.85067e+07	1.70939e+07
sp1488	3.61478e+06	6.24236e+06	5.23348e+06	4.73919e+06	4.51548e+06	5.11558e+06	4.10789e+06	3.50032e+06	2.87874e+06	2.83261e+06	2.62403e+06	2.46816e+06	2.57722e+06	2.62617e+06	9.86482e+06	2.96391e+06	1.75304e+06	3.0462e+06	3.86963e+06	4.97119e+06	6.26343e+06	4.95165e+06	2.95589e+06	5.8287e+06	6.91809e+06	4.69917e+06	1.60666e+06	1.93844e+06	4.80792e+06	4.02524e+06	1.70548e+06	3.28315e+06	7.96667e+06	1.75828e+06	1.7415e+06	9.98411e+06	5.29744e+06	5.1642e+06	6.0948e+06	3.98209e+06	3.79684e+06	3.39793e+06	6.69063e+06	2.81913e+06	3.97693e+06	4.66021e+06	5.91892e+06	4.07025e+06	3.49547e+06
sp149	641292	1.12516e+06	877712	1.1972e+06	1.20124e+06	969624	1.13104e+06	1.41323e+06	1.03635e+06	732984	712163	2.58887e+06	1.07905e+06	1.08374e+06	2.14344e+06	493432	504150	1.03263e+06	716344	500457	1.00438e+06	595932	1.09741e+06	702472	565268	1.11245e+06	937776	1.32696e+06	1.75891e+06	743843	912056	888123	535841	1.12055e+06	612696	866082	1.08054e+06	946808	917028	926754	918695	1.5382e+06	877069	580588	471380	379424	1.48297e+06	478140	393071
sp1490	1.6707e+07	3.77176e+07	3.29657e+07	3.18282e+07	1.83478e+07	2.89493e+07	2.59642e+07	2.09206e+07	2.19902e+07	1.40087e+07	2.61818e+07	3.10012e+07	2.71542e+07	2.57891e+07	5.1041e+07	9.58433e+06	2.5821e+07	3.30638e+07	3.14872e+07	3.43633e+07	3.20075e+07	3.07494e+07	2.01546e+07	2.91995e+07	2.18854e+07	3.68958e+07	2.467e+07	1.6843e+07	2.85283e+07	2.36111e+07	2.57952e+07	4.38968e+07	2.58139e+07	1.89929e+07	3.25841e+07	4.81398e+07	3.92999e+07	2.82192e+07	5.90418e+07	5.37924e+07	4.23929e+07	5.10001e+07	4.3724e+07	5.70841e+07	5.58925e+07	6.84392e+07	3.6076e+07	4.61977e+07	4.47952e+07
sp1493	2.71693e+07	3.38074e+07	1.53853e+07	2.06098e+07	2.93447e+07	5.93872e+07	5.80713e+07	3.63132e+07	7.5907e+07	4.81649e+07	6.20262e+07	5.6969e+07	2.52948e+07	2.43156e+07	7.04758e+07	9.63048e+07	2.20934e+07	2.88047e+07	1.3737e+07	1.26531e+07	2.27385e+07	1.87549e+07	1.72629e+07	1.83267e+07	2.79037e+07	4.78255e+07	4.30052e+07	7.80221e+07	1.04529e+08	1.09265e+07	2.19213e+07	9.72626e+07	1.55254e+07	5.59075e+07	2.71532e+07	1.65978e+07	2.86837e+07	2.95353e+07	2.14679e+07	1.86448e+07	2.67925e+07	5.69794e+07	1.72437e+07	3.39048e+07	4.20352e+07	3.6901e+07	3.76398e+07	1.59404e+07	7.93426e+06
sp1494	161975	629471	349976	453649	399044	515572	487181	537695	420259	2.60014e+06	2.05838e+06	1.8811e+06	342251	513111	1.20628e+06	780438	406646	242965	310081	596507	655770	225381	18859.9	455865	883466	857973	510571	707108	1.71554e+06	127126	288025	511991	335948	482020	456741	187757	276105	347131	312257	252774	346855	476425	110451	282006	332302	351728	339447	224232	72446
sp1495	434704	426681	370669	387394	256466	442522	383344	331000	291813	306727	319752	315910	432213	415484	535166	260951	337049	430779	639719	221316	625851	607940	635881	369186	431546	1.44415e+06	873749	582227	747091	813269	629420	726601	598476	800962	711326	338645	305848	325642	413615	304987	287740	441897	491024	206483	298217	190770	560211	392424	578766
sp1497	29320.2	12316.2	19749.1	73066	67187.6	38305.6	29184.3	573458	141212	35143.5	451520	123695	148618	177651	172856	49459.8	77463	43837.9	31713.4	25257.3	22957.5	40995.1	26677.8	46959	37711.9	22316.9	25714.5	13904.3	17174.7	23512.1	6779.07	119159	15397.3	11336.8	298898	12965.8	36735	59585.6	22664.3	15513.6	14427.6	71991.2	10256	29528.3	45443.7	39073.9	43064.2	16090.6	29721.7
sp1499	1.84221e+07	1.48486e+07	1.96213e+07	2.30647e+07	2.15808e+07	3.21717e+07	2.67663e+07	2.81145e+07	1.81597e+07	2.32293e+07	1.63893e+07	9.13329e+07	1.85904e+07	1.89838e+07	1.65084e+07	2.48501e+07	1.64359e+07	2.22004e+07	1.94959e+07	1.41021e+07	2.72547e+07	2.04361e+07	1.86472e+07	1.17767e+07	8.94118e+06	2.58887e+07	3.64486e+07	1.36601e+07	1.52265e+07	2.06383e+07	1.4916e+07	2.25842e+07	3.10498e+07	1.50217e+07	2.28579e+07	4.73243e+07	5.7669e+07	4.20528e+07	6.61457e+07	6.43163e+07	6.98928e+07	9.49083e+07	8.4118e+07	1.05115e+08	1.0519e+08	9.82097e+07	5.61032e+07	5.84016e+07	5.83052e+07
sp1500	279736	388117	310668	409128	424495	209012	347843	573315	323768	288626	555338	339314	484045	522633	355745	369603	515501	324423	555547	546979	607489	679743	349268	458939	299002	365616	588493	603856	15248.3	409909	354790	506768	511433	562792	701515	481181	372311	381753	363496	399649	350792	371054	340223	1.04013e+06	698647	901004	332067	475940	497077
sp1502	3.03743e+06	539445	593676	1.2926e+06	1.26132e+06	2.32528e+06	1.39322e+06	1.05895e+06	1.89434e+06	861289	1.00839e+06	3.39379e+06	1.48916e+06	1.45216e+06	1.72387e+06	2.52002e+06	2.40769e+06	1.14884e+06	732226	742485	861728	3.10152e+06	1.39613e+06	1.98701e+06	751801	877628	2.79109e+06	1.22394e+06	1.52155e+06	1.09627e+06	1.0266e+06	1.31226e+06	1.22345e+06	1.51633e+06	1.63754e+06	1.67754e+06	2.41152e+06	2.24631e+06	1.99436e+06	3.22524e+06	1.76903e+06	3.11441e+06	1.88224e+06	5.13754e+06	4.30891e+06	4.02719e+06	2.32926e+06	2.85445e+06	2.74721e+06
sp1503	1.14254e+07	1.21325e+07	1.07421e+07	7.21729e+06	9.24493e+06	1.50989e+07	1.94388e+07	1.35865e+07	1.54904e+07	1.19748e+07	2.4228e+07	1.41244e+07	1.82911e+07	2.52479e+07	1.00135e+07	6.47094e+06	2.32279e+07	1.57647e+07	4.28878e+07	8.27135e+06	2.12111e+07	2.7865e+07	2.72458e+07	2.16378e+07	1.75001e+07	1.58051e+07	1.90289e+07	1.02837e+07	1.44821e+07	1.60431e+07	2.32742e+07	7.80938e+06	1.2452e+07	1.14514e+07	1.47555e+07	1.35755e+07	1.38322e+07	1.58571e+07	8.65237e+06	9.67839e+06	1.03004e+07	1.31035e+07	7.5423e+06	1.21121e+07	1.11879e+07	9.08691e+06	1.09172e+07	1.17176e+07	7.43902e+06
sp1504	3.69366e+06	6.65159e+06	5.37186e+06	1.22697e+07	8.69653e+06	3.86714e+06	1.85691e+07	1.14554e+07	6.45806e+06	5.08791e+06	1.20915e+07	1.13246e+07	1.01422e+07	9.63804e+06	4.05703e+06	1.59252e+07	7.64357e+06	5.78742e+06	1.51682e+07	9.90668e+06	1.83709e+07	4.68904e+06	1.23453e+07	1.08394e+07	1.14283e+07	4.47159e+06	2.31641e+07	8.60629e+06	1.12863e+07	5.60586e+06	5.34095e+06	1.30571e+07	2.18586e+07	9.01184e+06	5.492e+06	3.43036e+06	6.64691e+06	4.37178e+06	4.85907e+06	5.74964e+06	8.02186e+06	9.373e+06	6.00925e+06	1.88895e+07	2.19918e+07	2.20289e+07	6.18367e+06	1.27953e+07	8.19996e+06
sp1505	1.00243e+07	1.17897e+07	1.50072e+07	7.80079e+06	9.7038e+06	1.41224e+07	1.35084e+07	1.38436e+07	1.28114e+07	1.00319e+07	2.36331e+07	1.38288e+07	2.13502e+07	2.78774e+07	1.09434e+07	6.02315e+06	1.96703e+07	1.47659e+07	2.36056e+07	7.17294e+06	1.8213e+07	3.20916e+07	2.52504e+07	2.15814e+07	1.8505e+07	2.1325e+07	1.98944e+07	9.01823e+06	1.43649e+07	1.42623e+07	1.87293e+07	6.18432e+06	1.28527e+07	9.10684e+06	1.41303e+07	1.27142e+07	1.19922e+07	1.38254e+07	8.98083e+06	8.38911e+06	8.9894e+06	1.45483e+07	9.64157e+06	1.1235e+07	9.84928e+06	9.00676e+06	9.73125e+06	1.27308e+07	8.02673e+06
sp1506	5.15326e+06	8.38088e+06	3.68783e+06	5.19301e+06	5.25166e+06	5.82187e+06	4.20019e+06	4.69082e+06	3.48315e+06	6.93057e+06	7.37675e+06	5.07065e+06	5.58561e+06	5.5386e+06	5.95767e+06	3.58186e+06	5.89118e+06	6.66099e+06	8.47932e+06	6.36456e+06	7.56635e+06	7.7915e+06	8.64178e+06	6.74652e+06	6.00555e+06	5.40435e+06	5.36713e+06	6.20888e+06	8.86376e+06	6.64355e+06	5.18971e+06	6.65844e+06	8.54505e+06	6.19846e+06	5.23355e+06	5.22156e+06	7.11118e+06	5.24989e+06	6.10609e+06	7.03098e+06	6.2422e+06	7.78694e+06	6.10853e+06	6.25969e+06	5.97214e+06	5.52936e+06	7.32997e+06	6.27192e+06	6.55278e+06
sp1508	379868	405121	471008	422865	237027	634323	383656	665464	437791	369615	844415	536460	1.02371e+06	762735	392920	299642	558177	384166	1.39006e+06	434344	765002	1.00571e+06	781548	691078	464994	547868	595267	292600	535441	462270	548562	217528	328777	379982	442469	434388	427554	602205	246112	274746	548411	442371	339909	357650	321000	216114	311512	528619	223618
sp1512	8.59058e+06	8.99705e+06	9.32566e+06	4.67365e+06	8.867e+06	7.44962e+06	7.626e+06	9.55305e+06	4.73354e+06	6.27294e+06	9.20168e+06	8.78518e+06	8.09916e+06	8.30687e+06	1.17728e+07	6.41961e+06	1.06521e+07	1.42443e+07	9.82448e+06	7.39405e+06	6.18855e+06	1.04765e+07	5.31087e+06	1.20434e+07	8.67606e+06	1.42548e+07	1.23967e+07	1.08454e+07	1.9271e+07	8.59482e+06	7.84159e+06	2.66836e+07	9.02321e+06	1.12714e+07	8.41641e+06	1.96733e+07	1.61564e+07	1.4092e+07	1.99033e+07	1.51453e+07	1.52843e+07	1.68609e+07	1.45915e+07	1.78762e+07	1.59815e+07	1.58418e+07	1.67321e+07	1.55e+07	1.5693e+07
sp1515	927312	1.0266e+06	1.11744e+06	1.71987e+06	1.40943e+06	967396	1.3871e+06	1.25906e+06	1.02984e+06	1.7317e+06	1.06601e+07	7.23103e+06	2.14662e+06	2.73303e+06	1.9009e+06	970598	1.5768e+06	1.60124e+06	1.48621e+06	2.41353e+06	2.36239e+06	941810	1.65139e+06	2.60765e+06	3.21038e+06	1.61718e+06	1.94287e+06	2.28042e+06	3.75988e+06	1.20972e+06	1.04271e+06	1.90641e+06	1.16779e+06	2.97493e+06	1.22197e+06	2.74898e+06	1.19378e+06	1.44062e+06	1.17207e+06	2.08896e+06	1.58347e+06	3.86297e+06	1.37527e+06	2.30511e+06	6.20307e+06	2.20736e+06	2.80576e+06	2.27218e+06	1.99572e+06
sp1517	8.50033e+06	1.27667e+07	1.41476e+07	1.59954e+07	1.1411e+07	1.0919e+07	1.23877e+07	2.84862e+07	1.6807e+07	1.30345e+07	4.99674e+07	3.95354e+07	2.70765e+07	2.23318e+07	3.22497e+07	1.57855e+07	3.05976e+07	1.20831e+07	1.17107e+07	1.41551e+07	1.42454e+07	1.36163e+07	6.39507e+06	1.35011e+07	1.06609e+07	1.30077e+07	1.71569e+07	1.09462e+07	1.63975e+07	8.66059e+06	1.23355e+07	1.33442e+07	9.77138e+06	1.21259e+07	1.19776e+07	1.41444e+07	1.36149e+07	1.20405e+07	1.66015e+07	1.53226e+07	1.68787e+07	2.1001e+07	1.26611e+07	2.08434e+07	2.45875e+07	2.15631e+07	1.29154e+07	1.31179e+07	1.10068e+07
sp1518	2.6734e+06	2.65248e+06	1.90387e+06	2.87314e+06	1.90967e+06	3.30913e+06	2.50437e+06	2.35413e+06	6.52354e+06	9.40144e+06	1.02277e+07	6.71263e+06	1.70888e+06	2.05928e+06	5.63161e+06	1.55855e+07	1.63559e+06	773724	729327	2.23835e+06	3.17232e+06	968729	3.18473e+06	958727	3.187e+06	2.62449e+06	2.67246e+06	5.53942e+06	4.54519e+06	1.52985e+06	794002	1.20902e+06	1.90153e+06	4.47344e+06	1.26028e+06	437125	1.20757e+06	792003	2.20858e+06	567455	2.78909e+06	1.31071e+06	1.77289e+06	726892	3.08994e+06	5.3065e+06	868975	523984	264362
sp1519	2.61756e+06	2.81671e+06	2.90285e+06	3.8253e+06	3.17068e+06	2.75567e+06	2.94327e+06	2.8354e+06	2.01677e+06	2.62376e+06	2.62139e+06	2.20768e+06	1.60801e+06	2.13932e+06	2.58355e+06	2.23406e+06	1.80601e+06	2.55905e+06	1.67876e+06	1.73967e+06	1.77215e+06	2.37702e+06	1.88314e+06	1.89801e+06	1.73407e+06	4.09314e+06	3.169e+06	3.70831e+06	3.54324e+06	4.01899e+06	2.90964e+06	3.35365e+06	3.38284e+06	3.61466e+06	2.7118e+06	4.99572e+06	4.56391e+06	4.66594e+06	4.09401e+06	5.43452e+06	4.30084e+06	5.73243e+06	3.94868e+06	5.08669e+06	5.25395e+06	5.39886e+06	3.89552e+06	4.9011e+06	3.96653e+06
sp152	404286	231588	208401	266965	311447	268335	220459	214764	160212	371534	374290	733190	282560	256465	275981	133136	384018	261156	202506	242252	364977	347325	250105	430077	203896	345354	523131	269958	240733	296712	206905	418823	396380	254300	239365	467125	698162	313298	445951	1.43417e+06	402624	646641	332903	403040	366817	461336	386447	531938	474531
sp1520	254501	431903	336910	467154	416129	252215	275709	359523	307628	308467	405551	424814	357787	298541	503431	429648	519760	373896	299916	398091	385633	350637	343993	373485	315411	188161	326297	451165	267510	288389	305912	306069	259051	348702	261755	416289	424252	371457	282147	288352	347611	324791	295705	421883	291779	320446	282897	297674	318795
sp1523	671464	733916	706555	430059	271644	411524	681151	571578	297973	476149	281748	240027	317661	383268	556229	220686	478281	771832	623758	626633	508041	544493	674423	518625	474429	538636	601287	266007	418798	506121	541219	346758	894663	274098	488077	282361	265679	277753	285995	277732	306499	328835	239234	470705	424956	446727	241173	236161	251783
sp1524	6858.86	103663	195979	250928	252521	24594	59296.5	278643	227987	156855	1.65018e+06	293013	787823	403036	467604	291304	268586	137834	328183	284648	141213	66919.7	181580	406796	1.31298e+06	35765.1	321430	21511.7	43719.6	18468.9	37368	76919.6	9967.97	33668.2	234998	16245.5	167136	55979.5	21389	45209	44057.7	142966	30852.8	237296	554610	89416.4	171044	205941	51548.8
sp1526	349295	564891	251228	358852	464166	408467	275360	688583	406049	415117	469095	846591	535249	582887	731875	281237	398697	534869	405761	540390	561957	1.24939e+06	551570	471094	580892	614289	503473	504138	749235	697995	537829	515992	530563	644819	1.03686e+06	515627	831141	913302	401230	698924	304090	552076	401415	716439	495075	487752	307996	296987	308541
sp1527	7.53953e+06	1.05874e+07	1.09903e+07	1.16071e+07	8.95147e+06	1.00915e+07	1.80186e+07	1.96336e+07	1.08258e+07	1.0291e+07	4.55005e+07	1.11506e+08	1.86614e+07	1.4292e+07	1.06132e+07	1.14281e+08	1.5026e+07	2.15439e+07	2.1664e+07	1.58201e+07	1.66642e+07	1.75107e+07	3.06982e+07	3.14156e+07	3.50849e+07	2.14006e+07	1.29246e+08	2.3504e+07	3.67387e+07	8.18665e+06	1.07528e+07	1.40337e+08	1.73239e+07	1.62597e+07	1.25459e+07	3.5132e+07	4.98474e+07	4.813e+07	2.86356e+07	4.45158e+07	3.48959e+07	4.22307e+07	3.71511e+07	7.31709e+07	7.51635e+07	5.5462e+07	3.45271e+07	3.85085e+07	3.04784e+07
sp1528	1.70379e+06	3.10521e+06	2.82925e+06	3.35374e+06	2.28349e+06	2.091e+06	3.58148e+06	3.79136e+06	2.22619e+06	2.29519e+06	1.1672e+07	1.30569e+07	4.33963e+06	3.99183e+06	3.05433e+06	1.07149e+07	3.26054e+06	4.03776e+06	3.07844e+06	4.03929e+06	4.52646e+06	2.96663e+06	3.93652e+06	6.02953e+06	9.6999e+06	3.51393e+06	1.08764e+07	3.63217e+06	6.6544e+06	2.49861e+06	2.84914e+06	1.19049e+07	4.37156e+06	3.2965e+06	2.22634e+06	4.30157e+06	6.00742e+06	5.75936e+06	4.46221e+06	6.281e+06	4.75614e+06	6.15097e+06	5.11355e+06	9.63021e+06	1.22649e+07	1.09831e+07	5.70136e+06	6.08057e+06	3.92798e+06
sp1529	771267	1.36947e+06	938022	1.15729e+06	1.12124e+06	864112	760800	1.07593e+06	1.06683e+06	982222	1.05587e+06	1.12679e+06	977409	970264	1.36491e+06	1.26712e+06	1.24335e+06	967301	964468	1.09098e+06	992384	958380	932416	950519	935027	529235	1.06753e+06	1.25681e+06	902290	877637	933528	930357	728941	1.20445e+06	933863	1.11711e+06	1.15636e+06	1.12735e+06	818273	883343	1.04957e+06	978126	897129	1.14278e+06	856577	918495	924684	1.04713e+06	843439
sp1530	1.13517e+07	1.51758e+07	1.04139e+07	1.78678e+07	1.41358e+07	1.46696e+07	2.43205e+07	2.61005e+07	1.95705e+07	1.18068e+07	9.90685e+07	9.93622e+07	2.56296e+07	2.40319e+07	2.58789e+07	2.38e+07	2.11822e+07	1.48237e+07	1.58433e+07	1.92522e+07	1.81932e+07	8.95691e+06	1.71903e+07	3.83466e+07	6.42323e+07	1.37881e+07	1.76049e+07	1.37576e+07	2.16536e+07	8.51794e+06	7.94378e+06	1.69071e+07	9.70809e+06	1.34269e+07	1.07046e+07	1.54071e+07	2.17558e+07	2.49833e+07	1.21011e+07	3.24552e+07	2.47641e+07	5.29254e+07	1.41127e+07	3.22875e+07	4.20801e+07	2.64052e+07	3.16985e+07	3.45149e+07	7.88936e+06
sp1532	2.75352e+06	5.47522e+06	2.29293e+06	5.86057e+06	7.76994e+06	3.80378e+06	5.39153e+06	6.47214e+06	5.94719e+06	6.46687e+06	7.51596e+06	1.25776e+07	8.03889e+06	7.30886e+06	9.05094e+06	1.18399e+07	3.45553e+06	1.78894e+06	3.44513e+06	1.08682e+06	4.38225e+06	4.41064e+06	4.96898e+06	3.35326e+06	5.66218e+06	1.5833e+06	3.60114e+06	7.28958e+06	5.93507e+06	1.5669e+06	1.92457e+06	4.94542e+06	2.51728e+06	6.96632e+06	3.89161e+06	3.69858e+06	3.65473e+06	4.94076e+06	2.32465e+06	3.90823e+06	3.70729e+06	9.93953e+06	2.506e+06	3.52907e+06	3.6494e+06	4.22147e+06	4.59169e+06	1.81888e+06	1.24873e+06
sp1534	1.72865e+06	2.45345e+06	1.605e+06	1.42278e+06	1.55884e+06	2.2986e+06	2.14678e+06	3.70562e+06	1.49491e+06	2.26408e+06	6.08538e+06	8.77608e+06	2.13936e+06	2.19594e+06	2.31466e+06	2.76739e+06	1.69462e+06	1.44418e+06	2.23614e+06	2.73329e+06	2.27266e+06	3.47898e+06	2.40459e+06	2.66965e+06	3.07092e+06	4.2034e+06	3.78874e+06	2.62277e+06	3.2711e+06	2.82864e+06	2.5412e+06	3.01308e+06	3.65876e+06	2.32892e+06	4.33041e+06	6.51649e+06	6.79203e+06	5.49437e+06	4.72641e+06	4.69142e+06	4.55187e+06	4.2879e+06	4.53304e+06	5.07555e+06	4.56146e+06	3.79492e+06	4.2101e+06	4.05752e+06	4.84168e+06
sp1535	8.91264e+06	7.77407e+06	1.07952e+07	1.3804e+07	9.71029e+06	1.37388e+07	1.31454e+07	4.6335e+06	8.60655e+06	1.57858e+07	2.2046e+07	4.72797e+07	1.29862e+07	1.21629e+07	1.05721e+07	4.14182e+07	1.05402e+07	1.39757e+07	4.61827e+06	1.57027e+07	1.18701e+07	7.18014e+06	4.18003e+06	1.95159e+07	2.60053e+07	1.15853e+07	2.25575e+07	1.10473e+07	1.23483e+07	1.37465e+07	8.32904e+06	9.56084e+06	1.38847e+07	9.62612e+06	3.12669e+06	2.55048e+07	3.32672e+07	4.02973e+07	2.88785e+07	2.45798e+07	3.05458e+07	3.07906e+07	4.56309e+07	3.72564e+07	6.38671e+07	6.8645e+07	2.62355e+07	3.21303e+07	1.40488e+07
sp1537	1.94332e+07	2.59574e+07	1.94957e+07	1.10555e+07	1.13792e+07	2.69486e+07	2.93335e+07	1.75462e+07	1.82643e+07	1.36881e+07	1.20954e+07	2.29744e+07	1.41357e+07	1.43467e+07	2.66916e+07	1.27856e+07	1.24992e+07	1.54436e+07	1.89324e+07	1.1392e+07	2.32203e+07	2.10532e+07	1.95547e+07	1.72174e+07	1.22283e+07	1.76702e+07	2.86428e+07	1.81092e+07	4.03426e+07	1.43355e+07	2.15724e+07	2.09168e+07	1.6613e+07	1.91981e+07	1.91241e+07	1.53939e+07	2.20665e+07	1.73853e+07	1.35806e+07	1.20686e+07	1.88592e+07	1.65078e+07	1.47046e+07	9.40087e+06	8.86683e+06	7.24526e+06	1.76466e+07	1.11407e+07	1.11798e+07
sp1538	3.46551e+06	6.32221e+06	4.62243e+06	2.62922e+07	2.86381e+07	1.77684e+06	1.95314e+06	7.73715e+06	5.94177e+06	3.85515e+06	3.854e+07	2.71635e+06	2.89475e+07	2.55953e+07	4.48585e+06	3.06692e+07	1.04686e+07	4.20241e+06	9.64839e+06	1.06104e+07	1.39409e+07	7.88961e+06	5.18483e+06	1.48622e+07	7.02251e+06	3.70279e+06	1.07201e+07	996478	1.62385e+06	4.61783e+06	3.23655e+06	1.02407e+06	997517	1.06818e+06	9.03524e+06	4.45606e+06	4.33335e+06	2.64663e+06	2.07735e+06	5.9445e+06	4.63716e+06	7.35048e+06	2.00082e+06	1.31524e+07	1.04696e+07	6.54954e+06	3.37839e+06	1.27655e+07	3.53676e+06
sp154	101436	554273	147654	696619	456870	207301	164892	126553	703503	347818	395477	378993	111767	183039	373780	706108	325044	155952	126923	139671	141158	81772.9	122045	94948.8	143339	246748	325896	705980	449527	126102	187267	739934	84495.1	694276	301026	262206	352692	244381	286948	676251	478492	959901	369316	895882	916632	978350	335493	653591	284867
sp1540	3.25385e+06	6.5486e+06	4.95863e+06	2.75066e+07	2.74257e+07	1.94067e+06	1.71127e+06	7.99534e+06	6.95833e+06	3.76183e+06	3.62096e+07	3.03209e+06	2.99928e+07	2.64798e+07	4.87847e+06	2.95289e+07	1.07307e+07	4.36484e+06	9.90603e+06	1.04193e+07	1.46223e+07	8.24047e+06	5.63322e+06	1.50003e+07	7.33279e+06	3.89513e+06	1.05075e+07	860692	1.80277e+06	4.31102e+06	3.3261e+06	915573	1.03213e+06	1.15993e+06	9.09026e+06	4.34675e+06	4.48359e+06	2.83855e+06	1.85704e+06	5.65931e+06	4.54606e+06	6.95234e+06	1.87336e+06	1.0517e+07	1.17056e+07	7.22972e+06	3.70502e+06	1.23443e+07	3.42322e+06
sp1544	210546	1.35703e+06	423871	1.52888e+06	1.42503e+06	410444	664160	1.08175e+06	1.34484e+06	621824	1.25786e+06	1.70801e+06	504862	580580	1.45724e+06	2.26362e+06	2.29898e+06	458988	587373	349016	802250	436868	263909	325491	532163	242459	1.29342e+06	1.40184e+06	521736	225983	311818	702648	157566	1.80661e+06	661848	1.88433e+06	1.77617e+06	1.94131e+06	683027	1.44701e+06	1.39149e+06	1.37531e+06	996285	2.4063e+06	1.13583e+06	1.82418e+06	1.23708e+06	1.28846e+06	617721
sp1546	98675.2	32380.6	152627	181170	156262	59536.4	396758	627315	57105.8	83992	128312	20825.3	183587	205504	203958	120526	210879	127409	101523	93815.7	135644	131114	112501	112381	59131.8	295770	109253	86257.5	188511	133609	292202	204651	77718	93429.6	167662	179891	223777	268320	187185	150142	146338	283508	134174	145575	127048	103999	198356	84350.9	64144.9
sp1547	1.15362e+06	2.01306e+06	2.10959e+06	2.42005e+06	1.59738e+06	1.79313e+06	3.05984e+06	3.52002e+06	1.99551e+06	1.7305e+06	9.53326e+06	9.88082e+06	2.9722e+06	2.80194e+06	1.94112e+06	3.30086e+06	2.4309e+06	1.9364e+06	1.67581e+06	3.17865e+06	3.07383e+06	1.32921e+06	2.19558e+06	4.892e+06	7.74257e+06	2.82977e+06	3.75975e+06	2.11701e+06	3.86058e+06	1.78711e+06	1.43686e+06	3.02292e+06	2.56677e+06	2.11599e+06	1.62047e+06	1.86075e+06	2.36574e+06	2.15577e+06	2.42739e+06	3.70028e+06	2.85921e+06	4.65051e+06	2.28583e+06	5.19091e+06	6.16537e+06	5.66742e+06	3.05458e+06	4.16027e+06	1.68157e+06
sp1549	857448	1.37598e+06	1.32123e+06	1.59053e+06	1.05252e+06	976733	1.63959e+06	1.90877e+06	1.42056e+06	1.1322e+06	5.23696e+06	5.13937e+06	2.34643e+06	1.77418e+06	1.22519e+06	2.27548e+06	1.53726e+06	1.22285e+06	1.02046e+06	1.58196e+06	1.7054e+06	867978	1.31463e+06	2.2232e+06	4.37043e+06	1.9729e+06	2.18042e+06	1.15063e+06	2.21639e+06	802110	855664	2.13978e+06	1.79419e+06	1.14369e+06	981064	1.1969e+06	1.5144e+06	1.28426e+06	1.16891e+06	1.83576e+06	1.57204e+06	2.55949e+06	1.42062e+06	3.19847e+06	3.41423e+06	3.03676e+06	1.68323e+06	2.35866e+06	1.03311e+06
sp1550	3.18288e+07	5.46289e+07	2.40357e+07	3.31427e+07	2.52225e+07	2.41461e+07	4.56835e+07	4.81801e+07	2.18752e+07	4.04161e+07	2.45565e+07	2.31427e+07	5.6627e+07	4.6869e+07	2.32099e+07	2.32063e+07	1.40954e+07	3.16275e+07	5.62721e+07	7.89385e+07	4.45628e+07	6.90636e+07	3.66651e+07	3.56789e+07	3.9651e+07	1.61638e+07	4.14978e+07	3.95179e+07	3.49067e+07	2.75134e+07	2.8328e+07	1.72622e+07	1.5994e+07	2.60788e+07	2.62885e+07	4.92271e+07	5.59096e+07	3.52448e+07	4.3334e+07	2.20643e+07	4.41256e+07	4.19731e+07	4.89234e+07	4.23528e+07	2.63435e+07	2.69973e+07	3.74496e+07	4.86496e+07	2.46317e+07
sp1551	151300	179306	123066	331249	396598	263784	140287	350866	320122	116705	467491	365862	237835	262219	433441	499418	417612	474314	222951	216050	307272	1.29472e+06	699388	175281	438634	387757	737706	235125	218436	79957.4	88913.6	267290	64593.9	245901	754650	798674	913892	270399	120962	528322	194939	350272	124393	209404	136384	227286	147264	64684.4	68387
sp1552	994806	920617	627643	769281	766085	1.22105e+06	548452	577223	799210	726435	1.04835e+06	1.23906e+06	1.37251e+06	1.35705e+06	683019	1.25529e+06	760494	995938	1.04775e+06	992762	1.00011e+06	1.18956e+06	1.31366e+06	758053	679763	824030	1.19679e+06	915426	1.12347e+06	589587	681160	978037	716618	861048	542170	1.5248e+06	1.67375e+06	1.56347e+06	1.52802e+06	2.55241e+06	1.94099e+06	2.62512e+06	1.34146e+06	1.25489e+06	1.2147e+06	1.10538e+06	2.38583e+06	1.83073e+06	1.87066e+06
sp1553	588924	1.66402e+06	1.4404e+06	5.85704e+06	9.61268e+06	718482	508056	2.63005e+06	2.22242e+06	1.26582e+06	7.18113e+06	1.25233e+07	2.7428e+06	1.79972e+06	8.67357e+06	1.9516e+06	2.40888e+06	1.14645e+06	2.75486e+06	1.39308e+06	1.97667e+06	2.36128e+07	1.28497e+06	2.28384e+06	3.58261e+06	962634	1.92339e+06	5.46335e+06	4.73736e+06	1.38239e+06	898436	1.73961e+07	249891	5.61843e+06	5.92512e+06	1.76085e+06	1.57238e+06	810827	1.08842e+06	1.26106e+06	1.27341e+06	1.63384e+06	643487	782011	1.7522e+06	1.86623e+06	2.13363e+06	1.2075e+06	482685
sp1555	1.30459e+06	809767	1.08595e+06	324161	432301	3.30356e+06	1.6782e+06	536637	1.2582e+06	581902	333773	1.97017e+06	764787	484318	1.21788e+06	397053	217132	1.18934e+06	400300	379043	903976	499252	823007	842147	923385	1.87924e+06	2.19729e+06	736672	3.90873e+06	771485	1.18283e+06	1.57615e+06	517484	603212	903177	590315	1.04179e+06	984553	581970	555887	756497	1.32386e+06	1.02887e+06	165962	299244	125212	1.30499e+06	232903	175332
sp1556	2.59772e+06	2.79661e+06	2.91527e+06	2.90886e+06	2.69097e+06	3.03609e+06	2.90285e+06	3.0989e+06	2.83801e+06	2.91307e+06	3.10298e+06	2.79468e+06	3.21783e+06	2.97344e+06	3.27619e+06	2.91818e+06	2.98307e+06	3.0258e+06	3.34411e+06	3.09095e+06	3.15679e+06	3.43147e+06	3.18032e+06	3.54546e+06	3.06005e+06	3.41792e+06	3.517e+06	3.81066e+06	3.57554e+06	3.64991e+06	3.88394e+06	3.72237e+06	3.57997e+06	3.87378e+06	2.88868e+06	3.56326e+06	3.73627e+06	3.74415e+06	3.54831e+06	4.00131e+06	4.08692e+06	3.73398e+06	3.89413e+06	3.6595e+06	3.27266e+06	3.53469e+06	3.08095e+06	3.75557e+06	3.42264e+06
sp1557	1.57733e+06	1.20416e+06	2.17417e+06	1.21691e+06	844986	1.76614e+06	1.92622e+06	1.00312e+06	1.55589e+06	1.8038e+06	2.21395e+06	1.85127e+06	1.36978e+06	1.45275e+06	1.87236e+06	1.99511e+06	961306	1.92884e+06	1.68857e+06	1.23723e+06	1.82436e+06	1.62474e+06	2.06211e+06	2.36703e+06	2.492e+06	2.21941e+06	1.6985e+06	1.76073e+06	2.00252e+06	1.51019e+06	1.22781e+06	1.55632e+06	1.74474e+06	1.99161e+06	1.1671e+06	1.73249e+06	1.67303e+06	1.74717e+06	1.51779e+06	1.24263e+06	1.27408e+06	1.43407e+06	1.29128e+06	2.51259e+06	2.26363e+06	1.73808e+06	1.36794e+06	1.80992e+06	1.23826e+06
sp1559	12707.5	20082.2	252148	88137.9	108177	23487.1	38303.5	11697.4	17149.1	6777.85	3.80002e+06	493824	111408	91204.6	673228	333951	282103	10556.7	7135.54	111049	15721.8	17838.4	16490.8	28743.8	5.79588e+06	14101.1	557394	73308.4	13714.1	9049.73	6597.58	121493	18251.6	37951	3572.98	39402.3	250176	36335.1	6068.42	82015.2	79781.3	196682	41952.2	215975	1.12687e+06	176301	49323	290250	37270.3
sp156	1.04222e+07	2.67876e+07	1.15429e+07	175692	173649	1.84086e+07	4.16312e+07	449753	25832	2.03297e+07	55364.8	6884.8	76215.3	101279	29461.3	19774.1	61044.3	12950.9	5.18419e+07	418.459	2.46009e+07	9.01726e+06	3.64112e+07	1.02464e+07	1.45653e+07	19478.2	1491.43	9171.91	88425.1	648.553	7057.32	2631.8	8.60956e+06	1583.68	789900	588.268	3293.96	1361.24	6118.79	2190	6460.91	1278.09	5833.67	1524.63	1825.61	1541.96	628.598	7818.37	2856.15
sp1560	228471	245054	193554	290410	185732	210688	312853	491232	342477	273080	495705	135547	129854	237557	239830	413820	357013	337688	297713	336748	325253	301605	184189	337233	248815	395038	167558	155750	231003	325635	146287	189406	82904.2	106986	232869	180895	260815	266794	180345	244244	382027	229239	233099	369336	474470	391487	184433	219731	184098
sp1561	1.13521e+06	827217	743788	990518	801293	852462	897214	844428	943378	837321	1.06213e+06	722239	759004	730804	981908	1.0337e+06	910011	925388	800985	559709	656499	760428	896060	895977	1.01977e+06	1.17504e+06	791847	651628	633265	879724	886382	905292	982568	746870	838078	1.23516e+06	915787	980388	1.02245e+06	1.13894e+06	903681	1.01597e+06	748527	876718	1.00532e+06	755857	774889	834096	976454
sp1562	2.30288e+07	4.57951e+07	3.44524e+07	8.15333e+07	5.4707e+07	2.63689e+07	1.17626e+08	7.56257e+07	4.43486e+07	3.64623e+07	8.57967e+07	8.60649e+07	6.83539e+07	6.41175e+07	2.54174e+07	9.96804e+07	5.2268e+07	3.9487e+07	9.98054e+07	6.75733e+07	1.2784e+08	3.29204e+07	8.07547e+07	6.69454e+07	7.28962e+07	2.86797e+07	1.49707e+08	5.90226e+07	8.18452e+07	3.92707e+07	3.40512e+07	7.85986e+07	1.46833e+08	6.58129e+07	3.57235e+07	2.39844e+07	4.19985e+07	2.7515e+07	3.18885e+07	4.01961e+07	4.80037e+07	6.19939e+07	4.14418e+07	1.20905e+08	1.43907e+08	1.28812e+08	3.88701e+07	8.37254e+07	5.31307e+07
sp1564	561051	843463	667790	1.19747e+06	1.09303e+06	671969	2.0656e+06	1.23222e+06	833013	636129	1.40686e+06	1.76799e+06	1.12946e+06	1.12753e+06	3.54387e+06	1.68336e+06	690242	637437	1.23783e+06	1.12746e+06	1.73228e+06	1.05298e+06	1.64006e+06	1.38158e+06	1.3488e+06	728735	2.76817e+06	1.23465e+06	1.38096e+06	895561	588403	1.15667e+06	2.33702e+06	1.08051e+06	119501	587307	852146	855794	761088	920718	718330	1.09972e+06	674664	1.79404e+06	2.51496e+06	2.03454e+06	740985	1.72999e+06	869673
sp1565	419063	541129	503322	487309	500361	526312	560037	493091	491334	525470	517747	514829	475585	528752	520519	477714	509359	562309	560440	518854	609962	565960	606235	532934	529668	588072	589352	667680	645750	627523	669328	650704	696170	627091	509719	611891	603858	637132	682824	642572	664921	634878	627397	611906	569581	537611	660548	668136	704791
sp1566	152353	5.43338e+06	470461	1.3964e+07	9.60021e+06	136569	443313	2.09523e+06	1.11814e+07	647038	7.94617e+06	1.00526e+07	434286	298905	1.12366e+07	6.586e+06	7.48487e+06	94651.6	490527	315150	977881	2.28142e+06	1.09423e+06	314033	1.01898e+06	144149	1.2679e+06	9.46734e+06	2.63234e+06	172508	216640	7.41805e+06	29294.4	7.96807e+06	9.28556e+06	396404	371381	188574	37446.6	145541	425025	228843	133017	1.83016e+06	1.08384e+06	1.10667e+06	274960	491472	185442
sp1569	59833.7	359178	68159.1	496160	312869	142246	120985	102012	559421	128858	237717	232708	102498	111241	378728	662641	191180	42498.8	121367	43609	101982	86155.9	54250	26845.1	88438.6	129444	224544	408573	207400	60893.3	56583.8	345437	30524.9	469198	153255	153016	173908	160192	121551	201189	161961	202430	165494	258007	184894	245355	162954	208257	72624.1
sp157	2.50973e+07	3.09707e+07	4.507e+07	5.03224e+07	2.61234e+07	3.22529e+07	5.71403e+07	5.23749e+07	3.84052e+07	2.92927e+07	1.6976e+08	1.75773e+08	4.98479e+07	4.48286e+07	4.91737e+07	3.28782e+07	4.9098e+07	3.3444e+07	2.52099e+07	4.75809e+07	3.41242e+07	2.35242e+07	3.53157e+07	6.84112e+07	7.80797e+07	4.05303e+07	2.96567e+07	2.31173e+07	6.57691e+07	2.29549e+07	2.49007e+07	3.69236e+07	2.83019e+07	2.24762e+07	2.32446e+07	2.81508e+07	3.52406e+07	3.0388e+07	2.71329e+07	4.45952e+07	3.79093e+07	5.91129e+07	3.08434e+07	4.91194e+07	5.66519e+07	4.02557e+07	4.63133e+07	5.4975e+07	1.61216e+07
sp1570	346338	152586	593712	785126	243006	3.34311e+06	4.24297e+06	471545	1.1703e+07	419105	1.17924e+06	1.64737e+06	674487	363233	193331	455384	237114	1.02365e+06	251586	567057	336867	330186	289884	247626	394796	845387	3.44886e+06	1.44809e+06	3.87552e+06	1.6721e+06	743937	1.91826e+06	601725	1.72112e+06	223922	569307	1.28051e+06	1.18179e+06	1.08427e+06	1.49386e+06	1.20957e+06	3.73037e+06	968249	3.45566e+06	4.09613e+06	3.93852e+06	3.51461e+06	1.88435e+06	1.17037e+06
sp1571	7.30105e+06	1.68897e+07	1.05878e+07	1.03581e+07	1.11805e+07	1.23574e+07	1.43064e+07	1.4872e+07	1.55199e+07	1.14273e+07	1.73844e+07	1.80984e+07	1.42442e+07	1.3431e+07	1.87727e+07	8.50318e+06	1.19188e+07	1.01949e+07	1.03292e+07	5.65011e+06	1.00949e+07	1.2595e+07	1.15423e+07	1.0219e+07	9.95459e+06	1.97028e+07	1.12758e+07	1.48015e+07	1.44593e+07	1.34436e+07	1.53695e+07	1.25313e+07	7.74847e+06	1.18576e+07	1.48884e+07	1.53877e+07	1.32778e+07	1.38959e+07	8.45289e+06	1.23836e+07	8.37456e+06	1.814e+07	9.10038e+06	9.32742e+06	8.84135e+06	6.6853e+06	1.41226e+07	5.50197e+06	4.85217e+06
sp1573	629629	394480	689575	1.22527e+06	611142	581742	588225	713618	812174	896584	998726	373838	521031	604679	740200	1.3326e+06	792111	592066	465395	557578	445033	592241	538615	610748	689811	634413	902480	563407	840261	449242	514070	605134	338798	280335	501684	546331	547999	541815	402993	1.188e+06	688604	720291	695004	1.24558e+06	1.28181e+06	1.4911e+06	436009	730900	644072
sp1574	4.42652e+06	4.97295e+06	5.24603e+06	3.50201e+06	1.89893e+06	3.66843e+06	5.30282e+06	4.53789e+06	1.89907e+06	3.10112e+06	2.47548e+06	1.93867e+06	2.2164e+06	2.48886e+06	4.20197e+06	1.31813e+06	3.23159e+06	5.36174e+06	4.57053e+06	4.20137e+06	4.40413e+06	4.24255e+06	4.43383e+06	3.81783e+06	3.66256e+06	4.39684e+06	4.07294e+06	1.96927e+06	2.84231e+06	3.41558e+06	3.4881e+06	2.39429e+06	5.93336e+06	1.99109e+06	3.27752e+06	2.19894e+06	2.008e+06	1.95533e+06	2.35845e+06	1.95228e+06	1.89508e+06	2.23866e+06	1.94297e+06	3.5138e+06	3.19778e+06	3.53037e+06	1.69904e+06	1.42465e+06	1.65351e+06
sp1575	37341.8	97267.6	176980	77488.7	57535.9	102658	85023.6	53405.5	67618.8	82641.6	278991	438375	85502.9	54193.4	135990	176250	312443	142596	19696.2	513385	52823.8	35098.3	59918.7	157534	257045	38260.3	117414	89711.8	217995	13709	57553	22345.3	29868.5	43977.3	17406.3	68848.9	325909	111428	58524.2	195779	193488	183778	73171.8	54607.6	66007.6	91763.1	104347	299174	115980
sp1576	169891	202643	418788	428153	420548	331197	312962	999384	615302	344099	467154	276202	707929	732571	932629	289686	314768	273324	224840	278105	350654	436671	300900	385114	215696	176934	169007	301087	282340	169923	236478	233641	270768	257073	446179	118874	127060	142884	126873	130231	195449	183245	96740.4	149631	192088	156456	163509	122032	61752.9
sp1578	3.01252e+07	3.52978e+07	3.08846e+07	4.20959e+07	3.17123e+07	3.22227e+07	3.34787e+07	3.4686e+07	3.37565e+07	3.58926e+07	3.10083e+07	3.99444e+07	3.84011e+07	4.13342e+07	4.00311e+07	3.62687e+07	3.17578e+07	3.54734e+07	3.38553e+07	5.44366e+07	3.84716e+07	4.08818e+07	5.42736e+07	6.14237e+07	3.52068e+07	4.45604e+07	3.5173e+07	3.50452e+07	3.43272e+07	2.84051e+07	3.77397e+07	3.37551e+07	3.25535e+07	3.54556e+07	3.30495e+07	3.99606e+07	3.71807e+07	3.76791e+07	3.93099e+07	3.57743e+07	2.87427e+07	2.91833e+07	2.18626e+07	2.96164e+07	2.60843e+07	2.47562e+07	2.72225e+07	2.56447e+07	2.80907e+07
sp1579	418559	4.05957e+06	927868	1.65337e+06	1.88514e+06	639499	303233	759355	341690	7.78992e+06	2.461e+06	847957	1.11056e+06	952153	1.60798e+06	3.49549e+06	1.71208e+06	934606	346388	1.57573e+06	610305	1.65454e+06	471224	1.00782e+06	5.23376e+06	855182	1.23169e+06	912525	908982	771756	535829	424580	186883	850513	213319	1.06346e+06	1.36255e+06	871489	961815	984028	834467	645401	635256	498305	2.02332e+06	891459	534474	1.07957e+06	788718
sp158	35017.7	135919	51189.5	108895	123525	65048.5	41835.6	22760.8	97653.2	140956	89428.1	133659	52254.8	66955.1	81340.5	156492	117495	66935.9	49770.8	50770.9	55390	19571.4	32491.6	35529.7	59425.8	72133.1	121511	151565	114691	60863	67971.3	224430	19133.2	210581	101579	99562.4	180079	119298	187849	324539	275275	385104	217711	414295	566493	487983	124478	356718	210104
sp1580	56432.3	8.89597e+06	1.2373e+06	4.72452e+06	519605	121612	1.26412e+06	1.29063e+06	817901	1.44592e+06	3.81908e+06	3.09737e+06	4.94023e+06	9.22949e+06	3.28107e+06	1.74655e+06	3.2182e+06	1.38256e+06	6.62965e+06	456816	266430	940554	2.54875e+06	1.43397e+06	3.46182e+06	44236	1.00858e+06	18787.6	153510	12780.7	38487.3	147553	33518.1	85427.6	202344	100180	303197	368164	40613.8	204773	185903	766398	194939	555992	3.66116e+06	492105	678761	1.62279e+06	522005
sp1581	1.83376e+06	1.15674e+06	1.65833e+06	1.44385e+06	1.65582e+06	1.39852e+06	1.72595e+06	1.27758e+06	1.45472e+06	1.6347e+06	2.17068e+06	1.52668e+06	1.33479e+06	1.27454e+06	2.37022e+06	1.42879e+06	2.01905e+06	1.29255e+06	1.30179e+06	1.04223e+06	1.29503e+06	1.70747e+06	1.32671e+06	2.04184e+06	1.44613e+06	3.15605e+06	1.25311e+06	1.41035e+06	1.76912e+06	1.68512e+06	1.47738e+06	2.03478e+06	3.57442e+06	1.4498e+06	1.55718e+06	3.8693e+06	2.58586e+06	1.70765e+06	2.92558e+06	1.84355e+06	1.7223e+06	1.57175e+06	1.07111e+06	1.83826e+06	1.75171e+06	1.46317e+06	1.70317e+06	1.51325e+06	2.99462e+06
sp1583	1.47518e+06	1.19449e+06	1.85394e+06	1.38295e+06	1.34839e+06	1.55917e+06	1.78699e+06	1.14378e+06	1.74091e+06	1.6942e+06	2.06141e+06	1.47338e+06	1.27096e+06	1.32254e+06	2.20522e+06	1.70518e+06	2.01137e+06	1.37072e+06	1.5721e+06	883338	1.33558e+06	1.24156e+06	1.38844e+06	1.71603e+06	1.49242e+06	2.42201e+06	1.69477e+06	1.40624e+06	1.76103e+06	1.75965e+06	1.59894e+06	2.0214e+06	3.28762e+06	1.59339e+06	1.59085e+06	3.61492e+06	2.53853e+06	1.56335e+06	2.40753e+06	1.99376e+06	1.75297e+06	1.79914e+06	1.38218e+06	1.7358e+06	2.06648e+06	1.53104e+06	1.63304e+06	1.64091e+06	2.40451e+06
sp1584	210909	228643	276317	291319	541614	462618	278076	1.28343e+06	161256	221669	946596	671576	846247	442884	745216	1.00016e+06	176315	163836	189199	713217	284876	472500	615159	263925	1.00418e+06	745483	451043	166970	369983	240892	142269	153518	279234	227372	111572	445062	829438	521975	343101	479785	536130	393718	500401	175328	197040	102143	1.0051e+06	479486	435068
sp1585	1.99306e+06	791776	3.1423e+06	2.63319e+06	1.29633e+06	2.06042e+06	2.49776e+06	4.72472e+06	4.24359e+06	3.84055e+06	4.47147e+06	3.63558e+06	2.96305e+06	1.8075e+06	4.56414e+06	2.9348e+06	2.38823e+06	1.72042e+06	1.33241e+06	1.88378e+06	2.36776e+06	2.2041e+06	1.37755e+06	1.77729e+06	1.55294e+06	2.42316e+06	2.51794e+06	1.10614e+06	1.02457e+06	757064	1.05368e+06	1.37043e+06	1.61933e+06	1.33013e+06	1.51038e+06	1.57014e+06	2.75753e+06	1.20973e+06	1.61025e+06	1.65477e+06	1.51864e+06	2.05013e+06	1.65211e+06	1.72742e+06	3.00199e+06	1.48162e+06	1.61532e+06	1.73719e+06	1.60344e+06
sp1587	131868	154395	264349	203302	123825	231405	120085	274926	137400	205977	948359	694882	338962	174537	173462	359960	113835	136536	137259	185035	230295	218487	172357	326660	316002	171537	380986	171081	266136	110010	128864	181623	177267	218205	215903	268533	374671	286496	212002	252624	241230	291311	195601	310373	135556	354984	240362	185234	205515
sp1588	14776.3	304896	33661.6	299190	80173.9	30490.6	29180.5	99800.6	86331.2	60166	445509	8884.89	307775	201495	97311.5	34201.7	180546	83635	108697	42501	19396.2	74434.8	113913	124988	165068	10439.9	26732.3	7078.74	29745.7	16587.9	6534.25	8062.88	3978.14	20312.7	17470.6	11039.2	14520.8	3934.58	22259.7	55808.7	37698.7	36079.6	17571.7	34391.4	98107.4	105760	18035	187773	87647.7
sp1589	867969	1.89303e+06	612458	596823	977576	960605	3.6039e+06	4.07914e+06	1.32428e+06	1.40512e+06	4.75081e+06	2.04572e+06	1.32536e+06	1.04081e+06	1.62688e+06	1.25622e+06	1.5636e+06	466950	1.06667e+06	256687	1.2878e+06	893121	1.19216e+06	819897	891477	1.65209e+06	1.08581e+06	854581	1.82869e+06	465224	674294	1.95516e+06	1.26021e+06	574969	3.12162e+06	523135	559491	637364	550883	707850	507623	1.01469e+06	455150	451946	728977	370751	518325	498800	160481
sp1592	7.73526e+07	7.3956e+07	1.06171e+08	8.85199e+07	7.82036e+07	7.40908e+07	5.3591e+07	6.01075e+07	6.25473e+07	9.54301e+07	9.79978e+07	1.11262e+08	1.12004e+08	9.94018e+07	9.00151e+07	7.00804e+07	1.09766e+08	9.38875e+07	9.47182e+07	1.61759e+08	1.05031e+08	1.06164e+08	7.02495e+07	1.02027e+08	6.7981e+07	4.40422e+07	1.17952e+08	8.65511e+07	5.13154e+07	7.85507e+07	6.45967e+07	6.20156e+07	7.64949e+07	8.72781e+07	6.0738e+07	8.10236e+07	9.20282e+07	8.09844e+07	9.2632e+07	7.99973e+07	7.71817e+07	7.71311e+07	8.67194e+07	6.18866e+07	6.56169e+07	5.90434e+07	9.36732e+07	1.1438e+08	8.11445e+07
sp1593	4.22561e+06	1.88514e+06	4.61535e+06	4.41967e+06	4.00879e+06	4.1755e+06	6.88284e+06	6.38047e+06	4.37938e+06	6.85404e+06	5.00021e+06	9.19847e+06	1.00352e+07	1.08184e+07	5.79758e+06	3.4113e+06	7.31977e+06	1.19865e+07	4.78375e+06	1.19346e+07	3.69505e+06	7.48379e+06	7.20581e+06	1.03029e+07	2.8893e+06	9.18142e+06	9.20779e+06	1.08501e+07	1.20571e+07	1.28864e+07	1.22036e+07	7.60933e+06	3.64533e+06	1.03859e+07	3.86044e+06	1.38968e+07	1.51319e+07	1.84614e+07	1.45473e+07	1.55266e+07	8.64154e+06	1.29407e+07	1.43331e+07	9.17803e+06	9.3703e+06	8.45078e+06	1.57609e+07	1.57546e+07	1.14279e+07
sp1594	6.35904e+06	8.72314e+06	4.9304e+06	4.10184e+06	2.71838e+06	1.99826e+07	1.79062e+07	1.54717e+07	1.87135e+07	1.83942e+07	1.03244e+07	1.31825e+07	7.03285e+06	8.62364e+06	3.94645e+07	1.7365e+06	1.96668e+06	9.73375e+06	2.63677e+07	435475	4.36244e+06	7.52081e+06	1.41201e+07	1.28749e+07	1.00429e+07	7.66205e+06	4.00296e+06	4.57544e+06	1.5796e+07	1.01336e+06	2.58562e+06	1.24186e+07	500202	3.27824e+06	2.30337e+07	2.41476e+06	2.6572e+06	3.58441e+06	869061	939679	888019	1.52721e+06	765462	1.04601e+06	2.30315e+06	1.06179e+06	2.99023e+06	2.37498e+06	501571
sp1595	84657.4	913739	548919	1.41796e+06	1.14709e+06	179777	476214	125218	381009	352999	1.16848e+06	1.11638e+06	1.27453e+06	423692	928489	1.92335e+06	74228.5	55064.8	226252	468554	51813	821687	409037	731295	9.3006e+06	174761	1.86853e+06	558040	237210	104231	204687	661938	3871.29	349379	246398	128613	844426	315797	131071	262061	207008	553897	108665	700985	914577	442921	299258	1.14356e+06	66228.3
sp1598	2.35072e+08	3.02821e+08	2.77905e+08	3.1803e+08	2.89277e+08	2.20639e+08	2.69945e+08	4.02162e+08	2.63616e+08	2.98849e+08	4.59984e+08	4.63166e+08	3.83458e+08	3.85593e+08	4.30034e+08	3.09937e+08	3.85471e+08	3.27689e+08	2.75944e+08	3.18477e+08	3.43678e+08	3.79283e+08	2.7941e+08	3.05077e+08	2.62256e+08	3.60321e+08	4.67945e+08	3.96611e+08	4.28056e+08	3.03561e+08	3.11578e+08	4.63009e+08	3.29401e+08	4.09391e+08	3.44217e+08	3.66751e+08	3.33098e+08	3.25538e+08	3.42537e+08	3.44226e+08	3.1162e+08	4.24326e+08	3.0385e+08	4.87713e+08	5.09697e+08	5.10599e+08	3.36059e+08	3.45201e+08	3.29222e+08
sp160	387443	371019	581711	265905	190926	729444	1.08153e+06	507385	455684	463854	229438	290867	397825	511577	721147	274279	205795	487303	472976	260114	645637	650455	664632	791837	638159	859213	609831	524052	877864	523751	702938	567873	249169	445400	924496	299480	437637	410251	210439	296176	486150	507866	342002	171209	254977	142175	549069	296491	297412
sp1600	1.89741e+07	2.57726e+07	2.34981e+07	2.81341e+07	2.37384e+07	1.81144e+07	2.28106e+07	3.63685e+07	2.17789e+07	2.49292e+07	4.47756e+07	4.55683e+07	3.40167e+07	3.39879e+07	3.9581e+07	2.58467e+07	3.36259e+07	2.89923e+07	2.30478e+07	2.62886e+07	2.96666e+07	3.25641e+07	2.3927e+07	2.54545e+07	2.15994e+07	3.293e+07	4.64464e+07	3.53167e+07	3.92254e+07	2.58455e+07	2.63134e+07	4.44421e+07	2.7189e+07	3.65745e+07	2.98233e+07	3.3865e+07	2.80155e+07	2.68106e+07	2.97526e+07	3.02875e+07	2.7327e+07	3.8652e+07	2.66825e+07	4.75612e+07	5.20425e+07	4.8705e+07	2.8311e+07	3.12336e+07	2.78065e+07
sp1601	1.26734e+07	1.66227e+07	1.49916e+07	1.89966e+07	1.57101e+07	1.21365e+07	1.48968e+07	2.43425e+07	1.43056e+07	1.64376e+07	2.99118e+07	3.00592e+07	2.32499e+07	2.28731e+07	2.664e+07	1.77272e+07	2.26994e+07	1.97078e+07	1.57384e+07	1.85339e+07	1.9996e+07	2.16327e+07	1.6393e+07	1.77562e+07	1.40346e+07	2.21065e+07	2.8668e+07	2.39647e+07	2.61781e+07	1.73872e+07	1.85372e+07	3.0594e+07	1.77716e+07	2.4294e+07	1.95596e+07	2.20771e+07	1.87863e+07	1.77022e+07	1.89362e+07	2.01374e+07	1.64928e+07	2.52961e+07	1.69175e+07	3.18745e+07	3.3881e+07	3.37152e+07	1.94431e+07	2.02369e+07	1.78716e+07
sp1605	31521.7	419944	105709	503658	419952	95596.5	40341.3	315681	518445	116658	99273.9	195443	84215.2	101187	134489	641496	70488.6	83010.2	75993	16145.4	45933	18812.5	76788.6	33001.3	47406.6	63556.8	136980	428660	53737.4	28077.6	65944	154314	14907	180198	146227	602144	553810	592529	522998	235649	639261	541927	460530	1.44623e+06	882125	900550	263516	462953	330638
sp1606	292578	570971	252760	309223	241173	461344	553016	304028	410953	456870	678955	815708	374883	383543	842237	2.28486e+06	408272	689831	338877	377243	495329	315894	471261	438332	475850	1.27414e+06	1.50554e+06	1.08845e+06	1.84418e+06	655402	311457	1.68086e+06	604582	1.08011e+06	270029	471251	514560	416879	526216	342254	375694	586503	355475	355219	519254	325282	766743	351825	414646
sp1607	2.08524e+06	3.56705e+06	2.36434e+06	4.5429e+06	4.91134e+06	3.17874e+06	3.04383e+06	2.69971e+06	4.19503e+06	7.10748e+06	4.74682e+06	2.7566e+06	5.03208e+06	4.57864e+06	5.26772e+06	4.42169e+06	3.94329e+06	4.36405e+06	3.84895e+06	4.98521e+06	4.62979e+06	3.49393e+06	5.4188e+06	4.06958e+06	4.79016e+06	3.49738e+06	9.86761e+06	4.00778e+06	5.48507e+06	3.15492e+06	1.69174e+06	7.47701e+06	2.45272e+06	3.68269e+06	3.51099e+06	3.70771e+06	3.00401e+06	2.87962e+06	5.21929e+06	2.74024e+06	2.55191e+06	3.90245e+06	2.25599e+06	3.12209e+06	4.38968e+06	4.23878e+06	3.49215e+06	2.68933e+06	2.26737e+06
sp1609	3.21072e+06	1.06316e+07	1.85185e+06	1.34606e+07	1.28661e+07	3.44206e+06	5.62967e+06	5.4075e+06	1.21165e+07	3.91463e+06	1.08994e+07	3.7587e+06	4.05912e+06	4.51603e+06	1.75469e+07	1.80281e+07	1.18182e+07	1.01689e+06	3.94667e+06	1.58808e+06	3.43483e+06	1.54958e+06	1.27702e+06	1.47033e+06	1.93909e+06	1.80072e+06	4.4934e+06	6.35934e+06	3.68427e+06	1.82484e+06	1.18737e+06	3.13481e+06	938759	8.11682e+06	4.21508e+06	1.27519e+07	9.81809e+06	1.05789e+07	6.46025e+06	5.37701e+06	1.14934e+07	1.0767e+07	3.97598e+06	7.98449e+06	9.83062e+06	1.46592e+07	7.82707e+06	6.84307e+06	5.15892e+06
sp161	540090	235336	175441	283838	224152	726106	355094	144505	131301	215084	1.10043e+06	639248	302982	352073	423869	314051	326425	472576	171244	298053	856024	224822	2.82414e+06	456442	544196	597974	640615	315109	617908	385266	221197	842309	289147	271432	180650	523570	667659	590981	638978	264268	741820	735801	716897	499210	711633	1.32455e+06	708399	727502	336830
sp1610	13519.8	9205.67	11265.6	73989.7	32418	18695.5	34819.6	113855	56200.9	35939.6	3.18698e+06	1.6679e+06	158297	65473.4	107423	35216.9	62164.1	25857.1	51334.7	905452	27586.7	18406.4	11469.9	166195	32733.6	29669.5	40011.4	31521.7	26684.5	9583.95	23097.8	21079.6	6128.31	25547	72639.3	22105.3	67933.2	33310.9	30481.2	51483	32566.9	112608	6268.96	101733	112248	75424.1	78232.1	69617.8	10439.2
sp1612	549742	2.28377e+06	650210	4.17968e+06	2.94436e+06	853227	1.21386e+06	938369	3.97415e+06	1.12002e+06	1.85884e+06	1.80996e+06	683058	588965	3.90892e+06	5.28438e+06	4.87995e+06	559857	782564	315166	805476	554890	426254	635959	581791	1.28349e+06	1.53712e+06	6.61982e+06	1.34777e+06	557316	445858	4.25886e+06	673042	6.13024e+06	1.36293e+06	1.98579e+06	3.46426e+06	1.96867e+06	1.23631e+06	3.27916e+06	2.04861e+06	2.56969e+06	2.5847e+06	4.52341e+06	1.82856e+06	2.21066e+06	3.60986e+06	2.81412e+06	1.03687e+06
sp1614	296791	563963	132690	916954	832004	295206	296836	219026	1.35652e+06	277065	435419	986254	105648	392489	811736	996295	1.17869e+06	181959	169612	97742.7	179925	124586	226938	206282	350649	225154	347713	711200	378431	171096	232067	1.24069e+06	184758	1.76604e+06	721541	508132	928261	780728	559384	900353	406677	398032	289865	1.14122e+06	299975	454531	631952	796351	201140
sp1615	169071	271652	145421	293947	326618	126350	210447	111035	205735	127463	437058	188003	296753	274889	433711	320051	236488	90684.4	90464.7	97294.5	84972.6	138061	220185	114772	348305	133111	81223.6	52609.6	124121	96437.2	139181	99074.7	219508	51205.7	237078	45027.5	79122.9	28617.3	56609	43404.3	151500	42267.9	37716.1	51625.8	72577.8	78741.6	42898.1	47716	38374.9
sp1617	89904.9	701199	809559	480424	401827	306172	700859	981594	1.17843e+06	579198	1.00947e+06	2.02583e+06	375720	459273	1.38125e+06	782429	3.16429e+06	324178	157888	395617	513625	344834	270722	444909	607960	23814.5	976320	1.56587e+06	466605	88461.9	133978	1.32832e+06	51280.4	1.71076e+06	496187	1.50047e+06	2.7579e+06	2.47123e+06	428247	1.18697e+06	1.57451e+06	1.38116e+06	1.09537e+06	2.74736e+06	1.41329e+06	680701	1.17379e+06	1.40658e+06	283186
sp1618	4439.29	574931	151693	308738	214295	32784.8	41140.9	89335.9	108902	128552	132394	52421.4	255860	158940	223135	553148	9234.99	8688.48	169489	90308.4	9645.15	115070	49012.7	178169	387925	33146.6	255823	78690	29228.4	52760.6	33871	26037.6	140.067	47357.5	66613.4	3871.1	39788.7	66393.7	10604.3	42009.9	82534.6	100012	1924.26	256323	343865	139128	105579	263539	19814.7
sp162	897937	684351	1.03295e+06	1.6715e+06	956123	1.18268e+06	1.54204e+06	417563	744481	1.25447e+06	1.71326e+06	3.74481e+06	1.14135e+06	988070	1.2863e+06	4.8241e+06	1.01043e+06	1.2035e+06	463243	1.53785e+06	1.05959e+06	620971	100	1.64503e+06	3.24738e+06	1.03949e+06	1.99187e+06	978084	1.08986e+06	1.32714e+06	850154	861954	1.65633e+06	809994	378607	2.20983e+06	4.17937e+06	3.58307e+06	2.57227e+06	2.31164e+06	3.31365e+06	3.0736e+06	3.87745e+06	4.20337e+06	7.28376e+06	7.32092e+06	2.18054e+06	3.36637e+06	1.46712e+06
sp1622	5.22929e+06	9.18971e+06	1.11321e+07	1.09032e+07	8.33111e+06	7.25549e+06	9.19122e+06	1.89983e+07	1.35419e+07	9.38485e+06	3.34371e+07	2.74191e+07	2.0037e+07	1.44805e+07	2.14456e+07	1.16443e+07	2.0616e+07	9.35181e+06	8.25855e+06	1.07153e+07	9.33769e+06	9.90247e+06	4.15129e+06	9.11726e+06	6.65421e+06	9.17656e+06	1.19887e+07	7.82986e+06	1.10877e+07	6.3784e+06	7.90688e+06	9.46158e+06	6.94175e+06	6.84065e+06	9.17244e+06	9.86649e+06	1.01367e+07	8.40197e+06	1.28583e+07	1.06392e+07	9.83933e+06	1.50869e+07	7.00352e+06	1.33907e+07	1.47473e+07	1.4545e+07	8.57617e+06	8.6476e+06	6.27098e+06
sp1623	720016	1.00225e+06	1.14917e+06	1.0171e+06	1.06088e+06	764973	773924	934566	914623	897454	889045	884964	920613	742266	920773	682978	664501	726364	654686	570274	659131	855397	772026	798793	873281	868318	771440	484660	431724	729667	763451	637531	746157	710199	742863	1.42858e+06	926533	860218	874076	677372	545061	724077	572743	965904	782914	563659	451420	726795	643640
sp1624	499459	123199	105547	6.88977e+06	1.00062e+07	143476	168686	1.43771e+07	4.87647e+06	29426.5	6.33012e+06	56855.8	3.51161e+06	4.14445e+06	6.59553e+06	4.1807e+06	1.0038e+06	4157.85	134644	23720.6	374150	106253	168608	130658	81227.8	9102.55	13123.8	6020.16	3968.91	12711.7	7496.92	3677.1	78136.2	3790.62	577159	8676.89	11113.8	5966.64	11278	8660.5	1149.51	27114.3	3538.22	16041.6	31490.3	33125.2	11092	22698	9853.45
sp1626	765.02	2921.37	27922.7	86326.5	7947.82	421.544	2826.47	683.175	6117.68	1250.88	1.6315e+06	34318.9	10682.8	3203.67	3695.44	46293.6	61832.8	1156.24	20753	1163.54	5627.28	10978.5	714.576	17590.7	16135.2	73.8707	47839.2	3532.18	2696.06	516.412	760.991	3280.06	1478.5	3011.38	539.803	1629.02	17886.1	15642.6	1994.78	3174.49	2179.53	3203.27	2484.96	2529.64	14198.2	1192.56	826.953	60048.4	531.048
sp1628	148542	403054	179784	3542	8803.94	198676	502072	9729.55	1445.62	269257	3394.55	716.69	1735.87	5423.58	6548.54	6789.32	1587.21	2003.65	829416	2934.83	364053	126190	566474	156622	229263	2006.7	4258.44	953.617	4051.73	1791.87	1776.98	3738.41	138044	2929.43	12379.7	6979.7	2573.59	3665.04	1162.36	871.452	6992.97	974.63	4810.81	4585.77	1410.27	8605.73	4006.95	3357.06	4656.59
sp1629	19770.2	175919	35637.8	463897	271671	20389.8	32763	48245.4	422542	51906.4	100455	123438	49813.1	80553.5	212771	267219	104907	13915.8	35614.8	24979.8	33584.6	30823	8260.13	24806.6	34538.7	11330	53233	186126	84401.8	12597.1	20042.8	139665	6578.41	187168	77203.8	57160.2	91624.5	50948.5	37330.8	140094	55001.7	33784.5	20407.7	29343.3	76651.2	123553	23767.5	86753.7	18285
sp163	50077.4	12792.1	50605.9	59505	108126	46544.9	264774	61271.8	108812	83610.8	95848.3	107880	106088	67039.8	44789.1	202570	57850.9	44925.1	36592.5	55347.3	160319	47989.2	121882	65213.9	78008.7	83580.9	150737	55597.5	70169.4	68944.4	59927.5	44541.9	29368.6	39348.2	72249.6	6864.12	44355.5	65659.4	15864	12561.1	26165.8	85544.7	1037.84	49743.3	98586.2	53296.6	64848.7	16849.2	23993.3
sp1631	745809	1.23966e+06	1.07833e+06	787724	734746	1.11752e+06	1.04757e+06	966175	630241	925146	892111	743411	1.11089e+06	1.02662e+06	618962	613726	922295	646382	1.39102e+06	789344	1.09378e+06	1.18896e+06	931005	1.26798e+06	697034	1.41045e+06	2.13065e+06	1.65725e+06	1.49744e+06	687839	1.01555e+06	1.36999e+06	519590	1.72292e+06	913168	1.40888e+06	1.36613e+06	1.33224e+06	1.13784e+06	972278	1.05843e+06	1.35062e+06	1.03561e+06	1.59139e+06	1.3491e+06	1.3429e+06	1.11079e+06	1.1979e+06	1.04693e+06
sp1633	1.51561e+06	1.19907e+07	2.24798e+06	9.62139e+06	1.03613e+07	1.15544e+07	6.62397e+06	1.74276e+07	1.2329e+07	2.65007e+06	1.0486e+07	1.33239e+07	6.79685e+06	9.02933e+06	3.45016e+07	1.39706e+07	7.3445e+06	1.70888e+07	6.84609e+06	1.2601e+06	1.59652e+07	1.477e+06	2.7754e+06	1.54298e+06	1.77471e+06	4.18203e+06	4.5938e+06	3.79017e+07	2.97291e+07	1.30013e+06	3.62565e+06	1.84973e+07	1.09348e+06	2.61574e+07	6.72866e+06	4.06933e+06	5.76136e+06	4.36091e+06	5.52647e+06	3.50142e+06	4.75326e+06	7.59062e+06	3.32322e+06	3.115e+06	3.89634e+06	2.37941e+06	1.01074e+07	5.57848e+06	1.5471e+06
sp1636	2.24627e+06	378011	536309	5.09245e+06	5.53842e+06	1.62173e+06	281212	3.11879e+06	2.3498e+06	834895	1.9417e+06	1.84686e+06	6.9606e+06	8.35211e+06	1.13547e+06	9.03315e+06	1.46179e+06	172720	527543	377715	708798	950566	855568	609752	372086	150532	141345	695932	261013	268045	387349	320952	802017	527317	2.33435e+06	611953	573072	561791	652749	542774	988490	2.08846e+06	928229	221707	818329	241304	1.18241e+06	171045	219681
sp1637	192118	1.73167e+06	585423	4.09993e+06	4.23597e+06	347067	250310	264436	347784	623744	3.83705e+07	2.21863e+06	2.67259e+07	2.88725e+07	893077	1.03015e+06	3.09985e+06	802940	253680	4.24688e+06	245198	1.8125e+06	675583	1.35883e+06	2.43698e+06	250620	1.79945e+06	549703	62813.6	12417	323853	73041.3	213775	499975	126969	2.35435e+06	240857	391908	183762	176522	28966.9	307990	74507.8	1.01334e+06	800413	108835	687230	1.13285e+06	120242
sp1639	9799.81	164863	22020.1	115149	177169	7420	7990.28	5118.86	1505.54	9357.69	1.34844e+06	63004.6	288433	203660	38177.3	78953.2	30265.5	23931.7	1990.39	117723	2138.24	79552.4	29649.1	28978.5	19856.8	9830.45	18974.3	10838	5438.98	1729.94	8285.63	6429.44	5651.38	12307	2795.79	21250.2	5196.99	17628	10737	17335.3	9288.12	2256.77	5573.51	52812.6	34023.3	8914.18	16564.9	18735.4	7177.8
sp164	9.92831e+06	1.3895e+07	1.0386e+07	5.57188e+06	6.06183e+06	1.40339e+07	1.55659e+07	8.52524e+06	9.12875e+06	7.02936e+06	5.94658e+06	1.17984e+07	7.23719e+06	7.70181e+06	1.37791e+07	6.63736e+06	6.88667e+06	8.21282e+06	8.6107e+06	5.95773e+06	1.23851e+07	1.06675e+07	9.44158e+06	8.62128e+06	6.00907e+06	8.94642e+06	1.49909e+07	8.58056e+06	1.8886e+07	6.68916e+06	1.11631e+07	1.11366e+07	9.03643e+06	9.9342e+06	8.90834e+06	7.66332e+06	1.1463e+07	8.94522e+06	6.7458e+06	5.97452e+06	8.88689e+06	8.39773e+06	7.78751e+06	5.16766e+06	4.42834e+06	4.01352e+06	9.73314e+06	6.37265e+06	5.6017e+06
sp1640	4.05712e+06	5.79039e+06	3.52478e+06	3.85907e+06	5.10398e+06	6.42603e+06	4.2536e+06	9.80869e+06	3.84059e+06	8.16998e+06	7.16225e+06	8.53591e+06	6.30629e+06	6.72218e+06	8.14471e+06	4.30969e+06	6.03687e+06	5.66321e+06	1.52251e+07	6.68758e+06	2.074e+07	6.18074e+06	8.63551e+06	1.03157e+07	7.99275e+06	4.37596e+06	1.02143e+07	5.16162e+06	8.2923e+06	6.45151e+06	4.56607e+06	9.80532e+06	7.89688e+06	4.83822e+06	1.00533e+07	1.44542e+07	1.20188e+07	1.00934e+07	1.55903e+07	1.18187e+07	1.34108e+07	1.48207e+07	1.35103e+07	1.32625e+07	1.3793e+07	1.24991e+07	2.25917e+07	1.61511e+07	1.8965e+07
sp1641	4167.95	179977	55249.8	872025	876008	99774.5	158381	76482.4	321428	25637.9	131169	113238	10805.4	32162.5	2.61338e+06	167026	37635.1	20715.5	82779.7	9458.71	2527.99	36937.8	20349.1	62581.1	32646	16818.3	112498	52882.2	114793	2977.38	8692.49	133909	14687.2	55904.9	39430.1	149199	79869.6	184756	462447	35917.5	218259	47442.9	277086	14112.6	23392.1	758.037	450820	149460	62173.2
sp1642	97677.6	2.92512e+06	248252	4.43337e+06	2.8227e+06	288827	275788	558167	6.45961e+06	306385	4.67611e+06	2.69804e+06	281785	249439	6.5871e+06	1.85601e+06	3.60925e+06	154565	168180	142101	578222	1.5177e+06	414759	215641	272898	274454	609164	4.89279e+06	2.10477e+06	326975	132690	1.1089e+07	42866.4	4.6208e+06	4.82561e+06	157991	127594	75704	4043.29	57926.2	392218	133596	44714.8	1.17053e+06	401753	848622	95384.3	225705	159589
sp1643	2.04822e+06	1.21646e+06	1.49681e+06	1.48856e+06	1.8045e+06	1.9353e+06	1.82212e+06	6.2588e+06	2.02701e+06	2.03364e+06	1.49761e+07	1.07466e+07	3.88338e+06	5.16428e+06	7.95008e+06	1.54218e+06	2.31145e+06	2.87348e+06	1.6078e+06	1.75682e+06	2.39179e+06	2.23931e+06	1.39752e+06	4.32803e+06	3.60928e+06	5.28693e+06	2.63751e+06	2.23062e+06	9.42741e+06	1.46567e+06	2.03098e+06	7.69223e+06	1.54462e+06	1.99398e+06	2.04921e+06	2.3316e+06	2.17128e+06	3.06084e+06	2.90012e+06	1.99533e+06	2.46839e+06	3.16817e+06	1.94145e+06	2.69985e+06	2.33968e+06	1.94386e+06	3.49585e+06	3.70574e+06	1.83974e+06
sp1645	466462	107397	89774.7	116169	128763	60346.5	172781	266816	343041	162134	735956	392010	211609	178219	213653	335422	272029	55122.2	73049.5	91906.4	192338	44879.3	73328.5	77382.7	148396	124772	108847	75979.2	151306	52711.7	79734.9	76234.2	102436	64757.4	145191	15909.4	68081.4	30931.7	35668.5	79322.7	726301	112971	53769.8	30642.2	63278.3	132682	55762.3	58823.7	23370.2
sp1647	61690.2	109983	78695.5	178573	202968	191111	111317	650246	1.15413e+06	99965.3	399950	30408.5	128364	172018	569483	544774	67753.8	16304.8	159500	2502.64	50764.1	136388	47701.7	49484.9	11570.1	1562.41	66427.9	40243.7	16825.4	5974.62	5964.89	12142.8	154199	14544.1	265818	10308	1075.94	21701.9	13013.5	2609.77	2770.38	16551.3	2090.63	1433.38	24240.8	2082.17	2165.85	1796.22	1969.05
sp1648	55531.5	2.16951e+07	9.0467e+06	156385	122219	3.27118e+06	1.56172e+06	4.42872e+06	1.98003e+06	4.04022e+06	2.66965e+06	12423.4	1.26613e+06	1.7104e+06	8.18963e+06	17294.1	3.25964e+06	724663	1.32375e+06	2.5774e+06	1.62886e+06	4.0152e+06	2.72283e+06	2.93109e+06	2.62364e+06	1.52472e+06	54422.2	58346.4	714003	261417	1.37553e+06	25189.8	147625	20788.4	1.32388e+06	2706.72	4987.68	11624.8	19005.1	20040.2	24486.4	11257.2	13501	5706.66	16194.2	8841.36	4931.13	13234.8	10512.8
sp1649	309371	316181	108656	959658	602060	10431.8	848299	538302	237542	1.76253e+06	3.04166e+06	1.10935e+06	824352	1.16793e+06	686264	1.17136e+06	603660	103716	30298.6	604197	788578	453820	956188	435122	9666.62	979328	219487	72404.5	567171	336045	158540	84499.9	9225.03	39364.6	221704	282822	687749	779645	822478	633200	346034	433164	454278	350134	708627	219072	115956	953761	131839
sp165	3.15981e+06	6.35317e+06	4.35827e+06	2.55886e+07	2.67794e+07	1.90929e+06	1.79898e+06	8.06303e+06	6.17868e+06	3.9016e+06	3.81457e+07	2.76095e+06	2.35149e+07	2.57454e+07	4.97481e+06	2.80767e+07	1.06168e+07	4.02406e+06	8.94454e+06	9.45775e+06	1.39282e+07	6.84881e+06	4.957e+06	1.3833e+07	7.14075e+06	3.33454e+06	1.01565e+07	923244	1.44549e+06	4.13638e+06	3.23285e+06	1.06471e+06	877994	985979	8.62399e+06	4.45946e+06	4.26368e+06	2.47463e+06	1.84929e+06	5.80723e+06	4.95844e+06	6.84152e+06	1.71071e+06	1.20069e+07	9.82331e+06	6.00615e+06	3.45345e+06	1.25735e+07	2.86001e+06
sp1653	2.09985e+07	1.79396e+07	2.22442e+07	2.14307e+07	1.92099e+07	1.73216e+07	1.79958e+07	1.97854e+07	2.003e+07	2.06228e+07	2.19277e+07	1.88677e+07	1.94278e+07	1.99989e+07	2.16576e+07	2.06904e+07	1.9918e+07	1.85111e+07	1.87332e+07	1.85912e+07	1.82519e+07	2.26951e+07	2.17908e+07	2.18812e+07	1.9135e+07	2.36367e+07	2.03691e+07	1.84537e+07	1.38855e+07	1.97158e+07	2.01725e+07	1.86852e+07	1.42499e+07	2.01654e+07	1.95823e+07	2.09663e+07	1.71282e+07	1.88746e+07	1.87972e+07	1.56967e+07	1.1718e+07	1.35446e+07	1.20965e+07	1.54818e+07	1.62925e+07	1.04746e+07	9.2867e+06	1.3103e+07	1.43135e+07
sp1656	42468.3	104884	93594.2	42038.1	39571.8	88680.7	23043.5	82656.2	85075.5	41366.4	87775.3	45512.5	123847	82211.5	24537.9	53236.2	82385.3	129301	41530.9	28026.9	50287.6	76655.1	40843.7	61115.8	71732.6	64089.9	136733	75828.6	68605.4	63459.8	112676	133925	43572.5	61805.6	67544	97656.9	73681.3	65800.2	44717.6	89741.9	76687.2	121508	94819.8	98799.7	143691	82743.3	119902	85995.1	97511.5
sp1657	2.35989e+06	1.00824e+07	2.39608e+06	4.12791e+07	7.5189e+07	4.59748e+06	1.95373e+06	6.862e+06	2.56272e+07	1.20156e+06	3.16819e+07	269146	3.8256e+07	3.3739e+07	4.5663e+07	2.38005e+07	2.35702e+06	168075	7.07808e+06	33886.4	1.94362e+06	743656	3.43144e+06	2.34587e+06	636898	147042	676817	247410	251807	67028.2	85035.8	302821	186972	166889	5.34559e+06	293744	138002	377005	147416	165554	282484	239487	68442.8	138032	221490	102948	98289.1	58840.8	85218.9
sp1658	695300	320321	325617	536442	418921	384087	382285	625523	391230	661962	391331	522182	630413	630144	272713	320547	454511	516503	847050	976722	1.01078e+06	1.26771e+06	473577	924555	666008	478094	418515	625789	775267	840178	955069	519761	714120	623755	714734	569017	533939	530789	631692	797993	806067	701667	712752	771542	815687	906859	492323	1.27675e+06	1.2656e+06
sp166	153945	336499	237869	1.22336e+06	1.44657e+06	128803	147136	433242	365565	233931	1.91382e+06	191581	1.36643e+06	1.22303e+06	307880	1.56347e+06	573860	245786	485567	569050	664790	396529	251503	780424	382985	179488	544812	83419.4	127640	234745	180354	30385.6	45251.2	71482.7	470164	287055	315270	147514	164093	317152	242109	361111	137854	622726	600626	321272	180863	624949	206775
sp1660	6.63302e+06	1.17605e+06	1.89922e+06	5.36004e+07	5.17833e+07	2.2045e+06	2.66388e+06	4.50098e+07	1.33407e+07	3.70221e+06	1.71009e+07	1.13469e+06	2.32305e+07	2.29603e+07	1.15429e+07	3.94321e+07	2.64042e+07	460477	3.30479e+06	2.79659e+06	3.47742e+06	2.26837e+06	2.06047e+06	1.64682e+06	1.49005e+06	782288	785382	1.47565e+07	2.59061e+06	3.04947e+06	1.26719e+06	1.54113e+06	2.30227e+06	5.08787e+06	2.42097e+07	1.04629e+06	1.21915e+06	1.2918e+06	674497	1.60155e+06	2.12915e+06	3.18884e+06	1.80653e+06	1.64092e+06	2.87155e+06	3.37821e+06	1.60888e+06	1.00221e+06	930404
sp1661	25004.4	36189.2	20490.6	864141	284805	245896	134946	610102	58081.7	373752	4.12535e+06	3.03691e+06	2.00125e+06	2.48779e+06	200876	3.79252e+06	278131	253283	33761.2	1.17169e+06	754454	976993	1.22416e+06	935124	243876	417058	1.07669e+06	152568	707675	184618	87301.8	230211	11051.5	174534	57771.2	925995	910169	2.56283e+06	2.11415e+06	1.69888e+06	1.46614e+06	1.60793e+06	877388	954585	2.12009e+06	1.67637e+06	890521	2.49759e+06	377073
sp1663	1.56518e+07	1.98983e+07	1.45477e+07	4.88121e+07	3.59991e+07	7.6213e+06	1.04361e+07	5.17499e+07	2.90713e+07	2.63893e+07	4.64024e+07	1.48723e+07	3.71855e+07	3.36243e+07	2.62752e+07	3.77203e+07	4.70732e+07	1.30126e+07	1.63996e+07	1.24423e+07	1.49338e+07	2.07781e+07	1.83979e+07	8.59827e+06	1.53363e+07	1.45595e+07	2.46675e+07	2.03182e+07	1.0315e+07	1.17854e+07	1.31791e+07	2.34882e+07	1.74288e+07	2.04367e+07	2.45476e+07	5.48174e+07	4.71395e+07	3.49344e+07	4.59629e+07	3.4989e+07	2.58338e+07	2.89424e+07	3.50972e+07	5.85513e+07	4.75909e+07	3.95033e+07	2.99095e+07	3.12791e+07	1.35602e+07
sp1664	1.54118e+07	2.34126e+07	1.42728e+07	4.95159e+07	3.82742e+07	8.68379e+06	1.26433e+07	5.29007e+07	3.09482e+07	2.33152e+07	4.7333e+07	1.44177e+07	3.87929e+07	4.47042e+07	2.70453e+07	3.51063e+07	4.3745e+07	1.29574e+07	1.68645e+07	1.41653e+07	1.57697e+07	2.24111e+07	1.80177e+07	9.98364e+06	1.61654e+07	1.54108e+07	2.20357e+07	1.93804e+07	9.60206e+06	1.18353e+07	1.33065e+07	2.36434e+07	1.8653e+07	1.98786e+07	2.59425e+07	5.24894e+07	5.07756e+07	3.89253e+07	4.53628e+07	3.52616e+07	2.44602e+07	3.20154e+07	3.6499e+07	5.9271e+07	5.39107e+07	3.7625e+07	3.37518e+07	3.01013e+07	1.37653e+07
sp1665	1.51553e+07	2.3093e+07	1.47604e+07	4.79018e+07	3.639e+07	8.56987e+06	1.09171e+07	5.24502e+07	2.75043e+07	2.40322e+07	4.98113e+07	1.44472e+07	3.90422e+07	4.16485e+07	2.56167e+07	3.55691e+07	4.66599e+07	1.43633e+07	1.61602e+07	1.16489e+07	1.53613e+07	2.16916e+07	1.71653e+07	9.77411e+06	1.55278e+07	1.51567e+07	2.39565e+07	2.04739e+07	9.87011e+06	1.16227e+07	1.36726e+07	2.32643e+07	1.53893e+07	2.177e+07	2.646e+07	5.86547e+07	4.97661e+07	3.75636e+07	4.5922e+07	3.61433e+07	2.43241e+07	2.86496e+07	3.47801e+07	6.23838e+07	4.96941e+07	3.89194e+07	3.16654e+07	3.00886e+07	1.48761e+07
sp1666	24338.9	10646.8	4489.3	52519.2	40333.6	43663.7	48506.5	37590.3	27059.4	42793.4	517904	115365	66631.1	149529	111552	73464.2	42359.5	22660.4	1683.41	27010.3	29797.8	55315.9	89497.1	29518.3	37076.5	15349.3	23972.2	11383.9	18799.6	10913.3	7518.64	1253.09	646.287	5800.67	24920.2	13530.4	41795.6	50156.6	31297	21513.3	43367.5	46662.8	4097.11	35481.8	41888.3	37024	29613.2	29837	13463.4
sp1669	242895	585367	629976	1.55544e+06	1.51377e+06	356962	363342	376925	470994	262031	3.22704e+06	347512	539738	558626	786173	1.23867e+06	167249	73607.3	188562	430412	200987	619630	364197	380897	155919	381401	91493.3	67788.6	290633	127832	186702	214645	13868.2	46514.1	187409	292584	311770	672627	642649	366260	267340	430303	199940	172943	297009	96626.6	241993	238915	14297
sp167	45880.2	20408.5	23106.7	46765.6	62786.7	45488	29032.2	87881.3	67584.7	61028.7	36118.9	26726.9	31021.9	9983.34	70525.5	54340.2	68904.1	353826	110089	112455	57942.1	53417.7	77205.4	13621.6	31072.9	76335.7	28966.3	60303.6	38276.7	170632	21891.1	57809.2	93044	19793.6	67284.2	27394.7	27444.9	32118.1	75545.1	45939.8	28942.9	54677	56945.9	26204.7	60103.4	65794.8	37860.8	37659	256562
sp1670	1.00992e+06	1.92604e+06	1.5557e+06	1.57636e+06	2.15888e+06	860575	606276	1.11023e+06	915731	726482	1.49497e+06	1.5373e+06	609337	712247	2.17009e+06	1.83133e+06	3.17003e+06	820912	1.27627e+06	1.9153e+06	2.11326e+06	2.5192e+06	896560	1.24576e+06	1.60514e+06	284082	2.22126e+06	2.18271e+06	934445	908628	1.19485e+06	930473	893087	1.46041e+06	724585	1.66773e+06	1.31407e+06	1.2791e+06	1.08809e+06	1.4449e+06	1.2365e+06	1.16398e+06	1.40742e+06	2.51236e+06	1.219e+06	1.62141e+06	1.05865e+06	1.17643e+06	990125
sp1673	180393	277768	254734	246468	331046	182855	188564	237008	238087	124119	216200	183328	162410	162427	266744	177948	199394	159000	179852	247846	194346	145838	123500	130428	94437.9	114665	155096	198657	177189	168384	187209	144043	118548	178360	138686	189154	182956	126874	129220	156814	132844	125314	117778	138895	131978	73952.9	113615	123754	104681
sp1676	117915	87876.8	97230.3	104874	93153.6	66789.2	110897	91661.9	26558	138012	68144.8	31412.3	64987.1	41476.5	72145.8	123162	36777.6	35730.5	121444	27483	131578	94094.6	73480	118217	122066	73897	52134.4	62810.4	75448.1	21327.8	23426.1	36809	89731.9	78798.8	34798.1	1.34036e+06	891170	891101	941393	909488	780847	991873	754055	1.14188e+06	1.21574e+06	1.19725e+06	80153	81972.7	13528.9
sp1677	23724.3	42089.4	22202.4	48123.6	28847	18199.9	17943.4	33085.8	15435.1	20617	38025.2	26975.6	33535.4	39744.3	54758.8	8893.7	41549.1	50780.9	24889.7	25968.8	31411.6	29200.4	28564.1	30285.1	32165.1	25680.2	27078.8	23160.7	20165.2	32731.3	32545.6	57709.7	20526.8	17132.3	27043.8	46064.3	42340.4	50719.6	41803.5	41500.1	32542.3	34555.1	16119.7	26450.5	18041.1	24016.9	13707.5	20456.1	36560.9
sp168	10333.2	20950	2208.15	38694.9	417267	13491.1	16318.1	11983	39912.1	15515.4	10102.7	6865.85	39736.7	14650.5	18932.7	11099.6	70008.3	7694.42	11520.2	3116.75	16025.3	24582.5	20210.5	18328.5	13100.9	18080.7	2294.27	35012.5	8445.61	16365.4	9752.13	27091	22546.5	9700.8	27270.3	7569.08	5964.42	10431.6	7343.25	19001.1	8171.61	1951.86	3143.34	6917.04	28053.6	12457.8	17891.1	12791.2	5285.18
sp1680	2.7298e+06	3.0601e+06	2.21335e+06	6.51304e+06	5.03643e+06	2.23877e+06	2.5928e+06	5.10208e+06	5.49711e+06	4.07479e+06	6.18435e+06	2.22555e+06	7.16462e+06	7.22186e+06	2.41056e+06	3.29796e+06	5.48525e+06	1.97904e+06	2.22961e+06	2.85598e+06	2.31586e+06	3.76166e+06	472294	1.70325e+06	2.62282e+06	1.52475e+06	3.59694e+06	1.49475e+06	1.46834e+06	2.09161e+06	3.39589e+06	850583	1.81373e+06	1.83141e+06	4.98543e+06	2.86286e+06	1.87115e+06	1.80098e+06	2.55136e+06	3.0154e+06	2.48995e+06	2.7977e+06	2.5779e+06	7.57413e+06	9.134e+06	1.13304e+07	1.85119e+06	3.80574e+06	3.10756e+06
sp1683	2103.2	6.65692e+06	18556.9	5336.72	3233.24	2884.11	4893.5	2643.33	1490.22	413.241	5700.84	67986.9	75872.7	5205.6	117561	55757.3	2165.09	2254.89	714.87	4561.96	3577.07	35594.8	24960.4	2567.73	9395.44	1397.28	680.239	507.996	706.855	420.981	4577.59	563.609	2413.6	1631.65	1552.97	527.935	105995	3341.59	3206.6	20119.2	18420.1	24504.6	15886.9	39636.6	1979.8	8422.24	4448.11	7455.72	67578.6
sp1687	344248	236120	402637	438805	255310	407866	592850	642075	314661	200681	604446	326381	574756	256491	358482	507360	336300	474831	92335.4	523569	495320	219611	350634	2941.11	247457	332558	348539	393443	332068	337006	72459.2	295375	537004	281114	134367	164312	321123	198747	272662	285404	255974	330779	382531	431261	364093	448604	318701	220359	201783
sp1688	39106.5	418122	298723	1.91281e+06	2.04978e+06	402002	177935	226744	316151	651202	7.40007e+06	242035	2.1918e+06	1.4811e+06	271704	2.75893e+06	747435	1.40603e+06	181393	1.56823e+07	3.15365e+06	1.47447e+06	741416	2.97238e+06	1.03905e+06	457856	3.02977e+06	67140.1	97693	1.91129e+06	932163	218197	11856.4	135583	247915	494354	816514	1.90141e+06	609676	1.85962e+06	4.20666e+06	2.12177e+06	720467	6.24883e+06	7.16067e+06	4.85618e+06	1.55975e+06	4.77306e+06	408560
sp1689	192757	194596	155371	350976	519648	115901	177323	251671	166643	128987	299258	620220	137583	103629	292921	384631	1.65394e+06	127047	183955	105443	293414	137175	124664	116762	132565	69221.9	340778	349858	118380	118678	158046	116637	63079.1	293813	100478	612440	339240	470130	271632	373662	393319	382869	294310	590663	687441	780252	340194	420689	271626
sp169	285129	274201	236743	200954	152035	271058	241326	233705	99465.7	374731	194398	148600	217547	163575	304793	206054	212368	517428	481979	367023	265548	343892	347535	455189	505650	308615	141018	136678	424222	247316	437155	111031	203613	187679	148336	130399	129961	103230	144055	132057	353565	120382	122001	153871	181370	247310	146098	179816	106225
sp1690	319537	3.36699e+06	526635	5.25487e+06	8.82405e+06	1.22339e+06	511244	638967	5.44523e+06	337007	5.77297e+06	30943.2	6.95915e+06	5.51537e+06	1.1282e+07	5.84519e+06	368897	21132.2	2.17946e+06	20239.5	437008	260258	541559	656083	208098	58443.4	460452	73357.9	62339.4	11183.7	24591.3	45651.1	71826.4	12877	796760	54943.5	12270.4	61111.9	28120.1	46370	76116	100724	3713.66	92510.1	139515	151236	32561.4	61459.9	82842.7
sp1694	907810	2.64492e+06	1.43417e+06	743980	651321	1.26365e+06	820038	1.17468e+06	1.46472e+06	575447	1.64389e+06	1.03591e+06	1.26014e+06	1.36961e+06	684393	714453	639798	2.51281e+06	943052	462367	1.0587e+06	1.09974e+06	646471	1.2629e+06	1.0099e+06	1.12186e+06	1.71467e+06	1.24324e+06	1.52648e+06	794854	1.3324e+06	1.53777e+06	1.39752e+06	1.38283e+06	1.42652e+06	2.13441e+06	1.18724e+06	1.43694e+06	1.37976e+06	1.54336e+06	981927	1.34767e+06	1.59435e+06	1.75474e+06	1.67651e+06	1.71442e+06	1.2656e+06	1.4254e+06	1.64393e+06
sp1697	1.33571e+06	588197	525495	688967	427342	514726	1.45718e+06	1.20039e+06	1.41653e+06	488819	522435	1.05106e+06	355660	1.69201e+06	594501	674748	429674	1.26509e+06	570717	312029	376286	425895	725769	1.1611e+06	784231	358324	324266	826351	709806	1.11496e+06	821912	883579	1.03143e+06	913256	1.48588e+06	808815	474720	613074	709715	457308	728257	852116	1.67515e+06	343287	629878	1.88458e+06	456086	882663	385612
sp1698	4.69016e+07	4.43312e+07	5.45705e+07	3.89239e+07	5.21611e+07	6.66983e+07	5.9702e+07	5.65764e+07	4.52813e+07	4.40015e+07	5.21996e+07	5.98515e+07	4.87814e+07	5.45686e+07	4.95591e+07	7.51869e+07	5.46893e+07	5.70284e+07	5.34406e+07	4.69559e+07	6.06491e+07	6.39516e+07	1.4318e+08	7.06376e+07	5.59289e+07	7.17288e+07	8.54671e+07	1.10989e+08	7.3842e+07	7.02339e+07	4.67207e+07	9.67901e+07	6.2381e+07	9.7543e+07	3.76323e+07	8.13929e+07	6.47334e+07	1.08102e+08	6.44778e+07	6.81323e+07	1.73266e+08	1.53852e+08	1.25958e+08	1.56968e+08	1.82123e+08	1.91162e+08	1.6845e+08	1.7414e+08	1.8858e+08
sp1700	2.28307e+06	2.63606e+06	2.63872e+06	2.95866e+06	3.46501e+06	1.2208e+06	3.33014e+06	3.95975e+06	1.18908e+06	2.45884e+06	4.48193e+06	6.32399e+06	4.57481e+06	4.66274e+06	3.59408e+06	4.0345e+06	2.33694e+06	3.31591e+06	4.32181e+06	3.62311e+06	2.67512e+06	3.73352e+06	3.42581e+06	3.7111e+06	3.43021e+06	4.86247e+06	5.3762e+06	7.85084e+06	6.20265e+06	4.0542e+06	5.27949e+06	7.83663e+06	4.49302e+06	7.66925e+06	2.63736e+06	8.67014e+06	8.10891e+06	5.88723e+06	5.58655e+06	8.32739e+06	5.7598e+06	1.0743e+07	9.63234e+06	7.8606e+06	7.74367e+06	7.92399e+06	5.97132e+06	5.71995e+06	7.94851e+06
sp1702	1.17715e+07	1.04784e+07	8.85611e+06	1.18514e+07	1.19021e+07	6.86853e+06	9.68729e+06	1.31522e+07	5.55103e+06	5.36531e+06	9.13122e+06	2.1916e+06	9.72379e+06	9.41755e+06	1.36488e+07	4.09466e+06	1.31171e+07	7.70213e+06	7.02718e+06	9.89459e+06	7.40168e+06	6.73324e+06	4.28858e+06	7.677e+06	9.36175e+06	6.0207e+06	7.34337e+06	3.61219e+06	2.75154e+06	6.51401e+06	4.62407e+06	2.86631e+06	5.48783e+06	3.72568e+06	9.78971e+06	6.75223e+06	6.02658e+06	6.46035e+06	5.79676e+06	6.08082e+06	6.04912e+06	6.77636e+06	7.47652e+06	8.76774e+06	7.62427e+06	6.65981e+06	5.44352e+06	7.77783e+06	5.90558e+06
sp1704	1.38948e+06	2.24392e+06	1.27112e+06	6.29177e+06	4.87513e+06	1.29556e+06	1.68793e+06	4.77166e+06	4.86334e+06	1.15673e+06	5.35194e+06	1.91461e+06	3.5203e+06	3.41058e+06	5.34685e+06	7.43476e+06	3.83822e+06	477423	999918	591918	1.09248e+06	1.22418e+06	1.15161e+06	1.20156e+06	1.73205e+06	1.00083e+06	960341	731871	699576	456340	650058	627755	900666	597711	3.50897e+06	757633	852765	821970	745911	524759	758854	1.04243e+06	574206	681473	600452	506791	785165	569862	482458
sp1706	320394	647621	637701	366436	263741	451537	539145	314669	300294	777341	841196	383355	386332	396531	174069	217468	540344	111732	409057	198508	276490	483566	594125	430210	360125	251634	309938	384548	117635	268867	411945	226256	212586	267512	464005	326794	250525	166546	185451	227942	385578	129101	295567	704210	703254	750437	96623.5	345226	266707
sp1708	5.58201e+06	1.27985e+07	7.74157e+06	8.96882e+06	8.83328e+06	8.27335e+06	7.68813e+06	1.48341e+07	1.41608e+07	8.47354e+06	2.30743e+07	9.40092e+06	1.13209e+07	9.84485e+06	1.93607e+07	3.3383e+07	9.56094e+06	1.10376e+07	7.17798e+06	6.23211e+06	8.46551e+06	9.79925e+06	8.11427e+06	5.66743e+06	9.01084e+06	1.22749e+07	1.17528e+07	9.50749e+06	1.33842e+07	4.29181e+06	6.7538e+06	1.52361e+07	3.5196e+06	1.14696e+07	1.28129e+07	8.89559e+06	7.63932e+06	6.92324e+06	9.19587e+06	8.59384e+06	7.01878e+06	1.06062e+07	6.29694e+06	1.72119e+07	1.22523e+07	1.54198e+07	7.80105e+06	6.4184e+06	5.05571e+06
sp171	4.51263e+06	8.46312e+06	7.42542e+06	1.04512e+07	6.55888e+06	5.97432e+06	1.17218e+07	1.16523e+07	7.22303e+06	7.81101e+06	3.7846e+07	3.7346e+07	1.30627e+07	1.22288e+07	7.85988e+06	1.22197e+07	1.0442e+07	7.67077e+06	7.83931e+06	1.33961e+07	1.28423e+07	5.97676e+06	9.8467e+06	1.95515e+07	3.48203e+07	1.25036e+07	1.50754e+07	9.21612e+06	1.6135e+07	7.43115e+06	5.70607e+06	1.28427e+07	1.18923e+07	9.00407e+06	6.8473e+06	7.60233e+06	9.41536e+06	9.75637e+06	9.47989e+06	1.46429e+07	1.15872e+07	1.69321e+07	9.14371e+06	1.99046e+07	2.89046e+07	2.36024e+07	1.27821e+07	1.70036e+07	8.19144e+06
sp1711	4.12866e+07	5.51335e+07	6.41965e+07	8.28095e+07	7.84228e+07	9.22132e+06	1.26298e+07	1.57984e+07	1.22728e+07	4.5972e+07	1.60825e+07	1.18282e+07	8.75736e+06	3.55342e+07	9.80311e+06	1.67718e+07	1.15139e+07	1.12005e+07	5.464e+07	8.85624e+06	3.15717e+07	1.06324e+07	6.0366e+07	5.68394e+07	8.55085e+07	1.03528e+07	5.08498e+07	2.34649e+07	5.14486e+07	4.48373e+07	1.03905e+08	7.64396e+07	1.59675e+07	6.24552e+07	9.85328e+06	1.38145e+07	1.15967e+07	1.00342e+07	4.64037e+07	3.39621e+07	2.44802e+07	9.40465e+06	7.95239e+06	3.72351e+07	2.79279e+07	2.55475e+07	6.81592e+06	2.62376e+07	1.04599e+07
sp1713	585162	688520	866539	537178	522224	1.07296e+06	562067	348498	695329	631527	1.06194e+06	707837	1.09405e+06	1.14475e+06	203557	90005.7	902700	1.53987e+06	905750	316471	711180	2.01463e+06	904406	1.04163e+06	1.00588e+06	931991	497898	638359	940601	1.05916e+06	742262	1.19808e+06	491139	671761	1.6012e+06	555627	546654	690930	923681	747206	815734	1.57462e+06	885626	720265	1.05335e+06	794028	909388	796313	644575
sp1716	30234.8	416976	83405.3	178156	96436.9	35636.1	52884.3	96620.6	22796.3	79974.3	353112	174156	108629	49166.1	257801	510392	33968.6	3905.31	66235.6	73177	52744.6	34027	49134	43477.6	59068	46961.8	108743	128688	75092	29162.2	25226.6	187662	6119.49	102138	76671.2	111771	79060.2	18546.2	173907	87692.7	168909	195475	100195	405389	286669	219140	115326	300338	74592.3
sp1717	838035	965737	1.3458e+06	1.51471e+06	1.19376e+06	769542	626327	990186	942450	1.3179e+06	4.04276e+06	1.97874e+06	2.75151e+06	1.9497e+06	2.15026e+06	1.13712e+06	1.06388e+06	571807	786602	1.05026e+06	1.99727e+06	2.20061e+06	1.21074e+06	2.0469e+06	3.04473e+06	631115	481043	1.08005e+06	812041	692642	502301	516897	501457	918711	1.01789e+06	1.29526e+06	1.28371e+06	1.601e+06	617238	577741	793466	1.13808e+06	541697	850320	1.14312e+06	440876	560423	745317	570504
sp1718	1.37803e+06	224439	139532	185098	122476	543932	312506	25094.5	240494	147659	96102.7	466934	226896	249424	21485.2	6297.37	806612	295712	490883	117284	228685	453326	100837	212355	368432	94421.1	209990	475177	470529	299112	34398.2	830015	1.43138e+06	660341	343829	275989	244854	992908	849221	1.85396e+06	627845	1.88063e+06	682759	351993	511764	603334	428371	602126	710851
sp1720	188885	243673	175096	217358	263833	240817	159506	396192	109038	464159	369579	244172	366255	242610	101912	86165.7	430372	278959	590176	274983	432726	628849	311747	547011	486300	402791	629326	168801	321120	383702	656601	444431	174532	168381	434565	372360	312092	341179	204549	241740	285793	267008	248267	254676	263320	268289	233884	233245	225452
sp1723	179704	212468	202779	195988	142130	173179	223034	166738	178307	98105.7	279372	202891	189288	163150	71104	174016	328564	163575	110765	177927	135961	96375.2	112146	144432	226567	134838	44679.5	45897	78861.1	99743.8	112189	69588.7	135615	24885.5	191263	34473.9	22377	35134.7	38445.6	36720.7	37142.7	42795.5	23640.6	32973.1	58486.1	33831.5	28477	42555.3	30353.5
sp1724	164596	205796	243880	160331	116920	194196	265538	186573	182293	142102	245572	188610	214233	163030	198027	181384	344736	122346	75595.6	183104	203914	106898	157279	177155	250515	153255	85727.4	40021.4	85400	137623	143652	44062.2	129032	50320.8	141781	46922.9	43460.9	16204.7	44255.2	46577.8	72940.4	49340.6	22624.2	38816.7	34875.8	43729.4	34296.2	38392.6	4543.69
sp1726	1.63912e+06	1.29982e+06	2.23251e+06	2.86046e+06	1.45826e+06	1.03433e+07	3.44715e+06	1.82636e+06	1.81733e+06	937582	3.56961e+06	1.41836e+06	1.94548e+06	1.29094e+06	1.70498e+06	2.95323e+06	1.68989e+06	4.65682e+06	1.01315e+06	2.23517e+06	1.97491e+06	2.89773e+06	1.83048e+06	1.18733e+06	1.12344e+06	1.39172e+06	2.02699e+06	9.95519e+06	1.13337e+06	1.4352e+06	4.97647e+06	1.24612e+06	2.92242e+06	1.25423e+06	1.67944e+06	1.55517e+06	1.57278e+06	1.89873e+06	1.41564e+06	830231	735484	1.46694e+06	1.01006e+06	1.04564e+06	6.73648e+06	632130	963079	923201	1.5468e+06
sp173	46572.4	153004	220082	624927	555680	55764.7	58511.4	42871.6	311127	132756	748803	303134	253301	220753	1.04566e+06	421018	235872	37202.6	80855	468888	239738	274620	164700	144605	140009	8767.24	245377	155804	13687.9	121372	48901.8	71218.2	64082.4	226388	202984	56525.7	82686	36860.4	63753.2	76806	63644.9	15706.7	61918.9	94878.2	189053	133200	37312.6	162974	28313.4
sp1730	1.48525e+06	1.40832e+06	1.69424e+06	980332	514733	874639	894372	567123	1.40839e+06	2.6715e+06	2.26136e+06	395707	433522	364326	1.03611e+06	169176	400152	5.21969e+06	5.028e+06	281956	911809	2.82784e+06	2.24249e+06	3.30923e+06	2.084e+06	2.32792e+06	337314	161344	786014	466499	857053	676876	389640	124706	560636	231709	197936	146744	171451	61692.9	102087	96036.7	79301.8	247371	166492	160390	228041	78159.8	2371.79
sp1732	1.52477e+06	1.30274e+06	1.64567e+06	957590	522710	861282	904300	512633	1.49493e+06	3.14048e+06	2.28897e+06	364654	488377	332146	1.13483e+06	146966	337561	4.82856e+06	5.24067e+06	294856	961399	2.83934e+06	2.24319e+06	3.50099e+06	2.08631e+06	2.46074e+06	356907	186909	775461	432711	852809	736586	353377	135482	664580	236405	217884	192254	189704	86636.7	92807.3	91882.1	131571	294728	142053	216958	270235	60487.2	31095.2
sp1733	221704	278164	183379	175676	121615	185806	248710	241325	142172	280521	386989	198294	222118	272546	164172	196571	236412	136512	198653	108867	172647	162146	281268	192657	225677	249535	151059	107497	143950	141223	213343	102026	163559	111720	207763	106141	120366	116590	69757.2	84560.5	85982.9	149692	71569.3	100230	85970.5	72430.6	108233	71035.8	103175
sp1737	2.35916e+07	582366	253652	5.79931e+06	3.79872e+06	1.29082e+06	1.50116e+06	1.01775e+06	4.87309e+06	394252	554251	1.0864e+06	1.48009e+06	1.52478e+06	1.5323e+06	1.48977e+06	1.12696e+06	51279.8	369410	3700.62	142897	179322	321032	153114	262744	239161	4.10609e+06	3.1485e+06	1.07236e+06	110541	62088.5	194051	2.63611e+06	2.72154e+06	3.40477e+06	667960	496234	433419	361243	414568	562208	1.12758e+06	666426	345437	805740	190605	1.03165e+06	232298	238144
sp1738	236430	1.37164e+06	717130	262617	156059	156225	222445	436656	323069	205327	1.13589e+06	1.53198e+07	285131	161787	286225	1.61236e+06	431033	482843	1.39622e+06	725347	252107	273953	461790	519604	248495	634870	397819	508393	1.74637e+06	499822	1.16336e+06	1.21169e+06	918539	553219	705136	2.48486e+06	1.40008e+06	1.48404e+06	1.2935e+06	907131	1.67134e+06	1.62186e+06	1.34443e+06	864288	1.23155e+06	665369	3.10173e+06	1.68906e+06	1.17444e+06
sp174	315295	388295	490624	684726	375966	374489	404622	504768	451201	409098	525729	326842	399881	512360	444199	966483	451231	465801	323410	463856	431332	370181	244065	624144	608966	730686	271653	267308	470694	399397	360772	296111	199789	197274	334685	434116	461788	323786	491685	714069	465406	331153	423113	829409	809396	1.05197e+06	260275	421974	378250
sp1740	576699	746682	649222	318912	350959	544245	785266	542588	440007	821161	969194	402848	580654	504224	204586	278827	936232	209702	776087	330119	450099	776939	904065	545200	380240	606078	490710	345604	251930	503169	634777	380095	375007	334488	596375	412020	374687	350054	377008	331452	399897	234273	378920	1.28677e+06	1.15207e+06	1.35996e+06	196513	426444	470048
sp1742	797316	418287	926392	474947	253239	1.13183e+06	611622	500523	729018	1.05218e+06	343579	788779	100935	107458	1.09867e+06	334849	191716	615463	1.36604e+06	811061	561441	681258	1.32884e+06	2.60413e+06	1.10619e+06	1.32288e+06	521933	940173	1.542e+06	651762	529455	1.82746e+06	700531	790276	809033	406932	419793	563238	333294	249282	374748	195996	445618	4.86641e+06	3.99141e+06	3.84718e+06	483569	584552	403193
sp1745	1.68262e+06	609027	481761	3.78834e+06	3.0751e+06	902534	820858	1.74396e+06	3.11012e+06	633778	559503	10543.5	1.85494e+06	2.2146e+06	8.49032e+06	17775.4	1.01319e+06	830003	532424	732877	502567	1.11575e+06	368343	944019	725369	1.45201e+06	455457	6952.33	1.76279e+06	560353	558077	761.21	6.33481e+06	9878.03	1.75924e+06	56124.7	6830.27	2779.38	13920.7	7523.51	9563.75	14446.4	5083.11	1268.62	2426.14	3507.91	4650.02	5790.03	9829.78
sp175	949470	1.0466e+06	1.44998e+06	2.35724e+06	1.15607e+06	1.03286e+06	1.27936e+06	2.07894e+06	2.14044e+06	1.38726e+06	2.78585e+06	787688	1.60531e+06	2.14074e+06	1.54248e+06	4.04141e+06	1.79928e+06	1.69881e+06	1.17322e+06	1.59637e+06	1.07671e+06	1.09196e+06	685685	2.3176e+06	2.4128e+06	1.73534e+06	791246	533357	1.33765e+06	1.11553e+06	904965	1.17396e+06	334543	401308	958320	1.33387e+06	875158	1.31604e+06	1.04787e+06	911981	1.80632e+06	1.27389e+06	1.33825e+06	4.94839e+06	4.55942e+06	5.65715e+06	651406	1.38201e+06	919957
sp1752	1.00915e+07	1.32267e+06	1.09339e+06	1.09249e+07	1.03792e+07	1.4653e+06	2.32599e+06	4.72991e+06	1.34237e+07	1.00274e+06	1.50152e+06	538810	4.09622e+06	4.31322e+06	4.89532e+06	3.37903e+06	816733	925783	1.11469e+06	454059	361807	834598	171405	663310	846703	752840	1.78855e+06	1.599e+06	810096	292760	3.05681e+06	62202.5	530980	1.35814e+06	1.2059e+07	630099	500446	469039	413058	474290	613509	1.69057e+06	925069	591205	1.52365e+06	472398	710106	276405	263806
sp1754	7.08554e+06	878060	828934	8.4416e+06	7.78564e+06	1.09688e+06	1.68366e+06	3.35972e+06	9.66096e+06	1.07704e+06	1.02174e+06	522269	3.24334e+06	3.25916e+06	3.52154e+06	2.46534e+06	628670	756523	710775	249862	218083	908537	218982	384656	629188	536071	1.35298e+06	1.32941e+06	581259	193297	2.19584e+06	29418.8	435949	871597	9.1763e+06	486514	394580	320181	311244	381115	477596	1.40358e+06	706088	348280	1.09988e+06	378931	590561	192753	234747
sp1756	262844	400282	264244	361941	261640	206223	165221	352192	413244	722539	595337	499424	701430	756984	246487	713341	778918	744903	508281	231246	755736	237570	7275.27	359379	823214	507138	736492	4283.83	484452	325822	535250	14175.7	202698	6164.55	832286	13345.2	9569.61	8915.54	1403.46	9480.03	18169.3	2192.57	2673.59	16503.1	5461.29	10518.9	4439.3	618.412	11398.2
sp1757	336732	274199	553057	935691	449628	2.32283e+06	1.04979e+06	637874	656094	328926	962491	479632	612100	355630	875892	482253	652862	1.812e+06	348147	525863	804684	805728	479381	308628	399875	638732	680986	2.55762e+06	391433	481772	1.40708e+06	450721	970237	372442	642141	509149	562957	487776	492901	183152	277670	414505	267437	281874	1.93825e+06	190205	218229	287377	454687
sp1759	5.81447e+07	4.775e+06	5.1408e+06	5.1003e+07	3.71655e+07	2.01542e+06	4.86056e+06	9.33072e+06	6.04701e+07	2.77226e+06	4.75458e+06	576969	1.4362e+07	1.53464e+07	1.12453e+07	4.58747e+06	6.93144e+06	297228	3.51672e+06	17918.3	313280	1.06471e+06	797731	498010	825621	342394	2.17343e+06	1.34284e+06	759166	155756	452580	71743.6	659806	1.04137e+06	5.45828e+07	866355	799262	547434	746160	507234	729171	1.27225e+06	944900	716274	1.09274e+06	567756	1.06481e+06	461275	400379
sp1766	6.80963e+06	532618	664018	6.54412e+06	4.78835e+06	257603	621453	1.13991e+06	8.12271e+06	348163	556998	71106.3	1.77994e+06	2.0238e+06	1.42074e+06	529189	887423	45625.6	470796	3622.23	31523.4	127279	113077	38893.1	141122	52289.7	312264	173213	109825	25262.9	44538.2	28780.7	41951.6	149979	7.24986e+06	111532	88208.7	66578.5	83043.7	94300.9	81176	156889	98477.1	104742	117253	60025.4	149067	54639.3	61148.7
sp1768	835365	859566	2.26996e+06	3.14306e+06	2.31983e+06	1.30991e+06	685317	2.4628e+06	1.45927e+06	2.87786e+06	7.97204e+06	4.5452e+06	6.63561e+06	4.64418e+06	2.34803e+06	3.7652e+06	6.17309e+06	2.92245e+06	1.117e+06	4.27477e+06	1.25471e+06	879088	566354	2.09947e+06	4.90744e+06	940560	8.91881e+06	7.95784e+06	6.10936e+06	1.58286e+06	1.44599e+06	2.13548e+06	3.09607e+06	7.33552e+06	1.44799e+06	3.52213e+06	4.22441e+06	2.82129e+06	6.01433e+06	9.12305e+06	4.20431e+06	1.66332e+06	1.67488e+06	2.29209e+06	3.43312e+06	4.16392e+06	1.29726e+06	2.72169e+06	662397
sp1769	1.60762e+06	1.78668e+06	2.60204e+06	4.81315e+06	2.37695e+06	1.50577e+06	839759	2.79453e+06	1.60213e+06	3.28118e+06	8.49774e+06	3.29676e+06	7.81159e+06	5.57532e+06	2.85322e+06	6.26874e+06	6.32369e+06	5.26924e+06	675100	6.94966e+06	1.46061e+06	1.5145e+06	951976	3.70494e+06	4.94844e+06	2.00166e+06	1.42176e+07	9.03375e+06	7.96126e+06	1.13301e+06	1.83673e+06	2.68804e+06	3.50333e+06	7.1605e+06	1.35522e+06	5.89598e+06	4.55072e+06	1.72687e+06	6.3062e+06	7.23252e+06	4.97861e+06	2.09994e+06	1.65416e+06	2.33029e+06	3.75183e+06	4.93093e+06	1.32129e+06	2.69083e+06	853729
sp177	95629	133271	106571	339421	249611	232571	137201	228039	199599	90948	239143	96416.6	127512	152603	170562	132110	98444.5	145293	112787	57133.6	58658.4	124370	128707	105833	92249.7	245454	220719	147887	237360	233960	164157	183409	137554	157970	172036	183220	156690	146079	106052	89119.2	86641.6	116126	134626	130811	134521	116746	163687	150101	109768
sp1770	1.63145e+06	1.76515e+06	1.43e+06	5.23468e+06	2.62644e+06	1.30394e+06	949866	1.77318e+06	1.36008e+06	2.10414e+06	9.20902e+06	4.99261e+06	7.3871e+06	5.84919e+06	2.78003e+06	6.75864e+06	6.26097e+06	4.94275e+06	504841	6.77932e+06	870252	1.28849e+06	999243	2.24256e+06	3.58914e+06	2.05545e+06	1.20772e+07	9.38304e+06	7.11347e+06	1.2468e+06	1.2794e+06	2.08999e+06	3.13117e+06	7.7091e+06	1.5847e+06	4.41855e+06	4.66714e+06	1.65311e+06	8.9056e+06	6.66587e+06	4.69701e+06	1.76046e+06	1.48731e+06	2.48693e+06	3.68238e+06	4.65744e+06	1.09958e+06	2.78931e+06	804762
sp1772	1.82217e+06	1.60771e+06	2.40752e+06	5.2084e+06	2.69333e+06	1.38128e+06	984507	2.51138e+06	1.37419e+06	1.53374e+06	8.88541e+06	4.83082e+06	5.74484e+06	5.77636e+06	1.57242e+06	6.72734e+06	6.66617e+06	4.97e+06	1.03353e+06	7.62631e+06	965264	1.52054e+06	804584	2.86704e+06	5.23312e+06	1.04958e+06	1.36771e+07	9.45587e+06	7.55124e+06	1.18043e+06	1.51842e+06	3.42767e+06	2.86428e+06	7.52161e+06	1.29608e+06	4.71568e+06	4.83163e+06	1.98278e+06	9.03904e+06	7.49219e+06	5.04845e+06	2.00754e+06	1.83675e+06	2.55178e+06	3.58849e+06	4.00462e+06	1.12561e+06	3.04778e+06	727167
sp1774	3.04835e+07	3.56508e+07	4.35722e+07	2.95138e+07	2.9859e+07	3.59693e+07	3.43843e+07	5.24381e+07	3.44202e+07	3.69038e+07	3.9826e+07	5.82944e+07	3.5824e+07	3.54088e+07	4.60678e+07	7.98086e+07	3.50607e+07	5.71158e+07	2.51252e+07	3.21178e+07	2.93704e+07	1.42414e+07	2.24693e+07	2.99286e+07	2.5998e+07	4.47346e+07	6.49381e+07	4.45948e+07	4.11832e+07	1.69068e+07	1.85417e+07	4.99729e+07	2.40331e+07	4.62018e+07	2.86514e+07	5.8827e+07	5.27391e+07	4.49974e+07	4.82471e+07	4.95178e+07	5.39931e+07	5.94988e+07	4.11028e+07	8.74825e+07	8.14149e+07	8.02906e+07	4.64902e+07	5.08839e+07	4.30017e+07
sp1775	43474.7	56872.4	124686	652290	398614	81771	131600	270767	376227	34507.5	95927.4	1530.17	291185	278091	875090	8322.98	82286	108026	5904.3	26636.7	24729.7	109432	4795.72	86110.1	107744	74441.4	5422.95	3869.21	25342.8	36472.1	181410	8545.1	33755	5107.92	127369	10756	1770.58	3049.98	3291.65	7390.15	9318.07	1861.79	12004.2	8609.97	6815.82	11371.9	1504.47	8932.53	6955.31
sp1776	62669.8	61190	153707	574777	467466	123225	110503	267099	419181	75149.9	84565.1	4560.61	214484	291137	998716	8711.9	46273.1	107643	33296.7	55662.9	15144.7	127342	5566.48	72960	77156	71081.7	22732.6	6179.52	40410.8	54349.6	154586	14120.3	31749.9	720.663	180569	7069.22	10591.6	4701.75	9930.62	3057.35	5570.96	5149.5	6297.78	4786.05	7052.82	2382.74	7526.76	4301.78	4248.38
sp1777	116703	102823	142533	996495	656979	134645	153100	416556	643252	62673.1	196267	5524.64	361701	523187	1.13745e+06	194192	134885	192620	47292.8	67063.9	28576.9	183246	13002.5	92530.6	159687	114500	26658.3	1656.34	62561.9	63524.4	160206	8428.27	42559.3	3089.89	224361	12457.6	6608.8	5678.17	7696.16	1359.51	7081.69	4920.27	6520.12	2410.49	1540.62	1519.86	8890.64	4738.44	1365.25
sp1778	154620	14519.7	40443.1	1.88197e+06	3.79012e+06	872239	65105.8	3.56138e+07	4.0188e+06	571614	1.05149e+07	15838	2.97833e+07	3.35391e+07	1.4314e+06	1.97963e+06	8.88848e+06	12517.2	109274	17835.9	40785.7	38188.3	25307.3	49762	18213.4	93140.5	53881.2	7322.55	63799.8	11131.6	11758.8	63232.8	46077.1	15025.5	9.6031e+07	34469.6	8032.8	12711.6	7695.52	11461.5	13709.4	3839.66	25618	11938.9	6661.7	12105.3	36722.7	13415.7	8326.63
sp1779	280095	55370.7	27067.3	3.18766e+06	4.63764e+06	172461	46853.2	4.14284e+07	9.80099e+06	139861	3.75806e+06	19321.8	2.32127e+07	1.83334e+07	3.45295e+06	2.97103e+06	1.08301e+06	3079.69	64178.5	1479.32	73757	30655.8	34053.7	28012.5	11091.6	4926.78	9844.2	17237.1	16229.3	11602	12539.8	6165.73	205757	23796.9	3.49606e+07	23013	9361.95	17705.6	21281.1	15778.2	14548.6	20155.6	14940.6	16460.1	40852.7	30501.6	11511.8	11304.8	27743.5
sp178	95100.7	52679.1	35705.6	77949.6	69016.9	76634.6	53380.4	207276	89850.3	97717.2	72740	463942	423965	420710	78109.6	164883	55461.7	6989.2	50906.5	102757	132796	66029	83829.4	68065	34169.6	13095.6	17658.7	148873	76160	34116.8	38821	32558.7	12240.1	48045.7	116381	23502.1	23454	31607.5	8166.63	34166.8	53989.3	64625.7	37485.8	11081.7	27498.5	8859.02	39794.9	20171.1	2803.9
sp1780	97992.2	150650	144602	1.04927e+06	600985	174217	140856	422607	897632	54611.7	187852	7448.45	468528	458899	1.31028e+06	9775.13	166500	204019	36269.3	76336.9	42883.2	94481.4	9871.3	106487	156961	87368.4	6025.91	1931.22	68262.6	76723.6	217553	2997.69	40232.8	5073.5	352099	6601.98	1020.23	992.986	3217.77	9216.61	714.413	967.51	4990.01	1505.1	12651.5	3071.93	2632.47	11206.2	2058.47
sp1781	109962	67716.8	29975.8	1.13583e+06	1.38603e+06	214341	81214.4	3.16488e+07	8.78271e+06	243021	3.7706e+06	59238.4	3.82184e+07	2.6354e+07	1.6444e+06	2.67039e+06	2.739e+06	13131.8	82320.7	5778.32	105960	48450.9	49429.8	26951.8	19681.9	3212.11	36613.5	40606.2	56918.1	16322.3	100	86493.6	118199	50373.2	1.84743e+07	65637.4	65285.5	34095.1	29633.9	35081	60965	47374.2	31781.1	34932.9	84588.6	79133.3	41404.7	42058.4	15912.3
sp1782	209551	58794.8	31737	2.82959e+06	4.37918e+06	224262	42054.9	1.2279e+07	1.31909e+07	217752	3.73241e+06	35120.3	1.07689e+07	2.07737e+07	3.76571e+06	3.15662e+06	668587	28256.7	50666.2	15774.5	82428.3	63553.9	62715.5	38050.6	37547.5	17832.2	17840.1	39173.9	22624.9	2137.63	39848.5	20186.3	106030	11679.2	3.1275e+07	53278.5	65516.8	34566.8	31498.1	12421.5	6157.94	60960.3	19242.3	32941.3	51029.8	36936.6	6611.51	12225	21147.3
sp1783	27741.1	55199.3	86104.8	49239.7	49931.2	52120	27093.4	75597.2	51148.9	100222	47615	138924	70353.9	64211.7	29000.9	64230.8	99897.1	73918.6	74513.2	220634	69323.6	55125.4	76828.4	64105.7	41250	13486.2	47505.2	104890	76937.2	44548.3	54998.7	11587.2	10190	74120.7	27760.7	35819.4	88233.6	111356	117611	88643.4	81081.7	68798.7	72402.3	155306	75936.9	54902.3	36984.1	53770.9	37182.8
sp1785	4.01e+06	2.30945e+06	3.83392e+06	866535	801707	3.64275e+06	3.6299e+06	4.37974e+06	640644	2.50184e+06	506993	789786	2.85616e+06	2.97948e+06	1.7045e+06	819902	834901	1.81993e+06	2.8648e+06	3.99836e+06	4.03375e+06	3.02949e+06	2.15533e+06	2.9836e+06	1.93856e+06	1.65164e+06	5.54415e+06	1.63225e+06	2.23195e+06	4.93912e+06	5.89651e+06	325941	1.38009e+06	1.65234e+06	1.38568e+06	5.82879e+06	5.3239e+06	5.33484e+06	3.03523e+06	3.35159e+06	4.36972e+06	4.30178e+06	3.13908e+06	2.67511e+06	2.00789e+06	1.4622e+06	3.5442e+06	4.34485e+06	2.96595e+06
sp1787	3.32652e+06	6.52993e+06	6.76392e+06	7.27994e+06	7.19979e+06	6.17524e+06	5.02803e+06	1.58134e+07	1.15382e+07	2.49035e+06	1.47885e+07	9.5687e+06	2.50861e+07	2.2272e+07	3.92549e+06	2.68095e+07	1.16486e+07	8.42908e+06	8.4155e+06	5.72195e+06	5.20857e+06	1.02411e+07	5.73627e+06	1.26839e+07	4.642e+06	9.99785e+06	1.55982e+07	3.26483e+07	7.59015e+06	9.77617e+06	2.25855e+07	4.2842e+07	5.85067e+06	4.70211e+07	1.47276e+07	5.75186e+07	6.47645e+07	4.86185e+07	3.99244e+07	4.23456e+07	4.9816e+07	6.05419e+07	5.87304e+07	4.30061e+07	3.84605e+07	4.5308e+07	6.53002e+07	2.60771e+07	2.53725e+07
sp179	2.44412e+06	3.34308e+06	3.44297e+06	3.64129e+06	2.97434e+06	2.7863e+06	5.25839e+06	5.8968e+06	3.37383e+06	3.20436e+06	1.44672e+07	1.34566e+07	4.93907e+06	4.82086e+06	3.26141e+06	6.32942e+06	3.76635e+06	2.97623e+06	2.47389e+06	4.36011e+06	4.62009e+06	2.36982e+06	3.48179e+06	6.72268e+06	1.13263e+07	4.75049e+06	5.41056e+06	3.34496e+06	6.05199e+06	2.45043e+06	1.99063e+06	4.70753e+06	5.0717e+06	3.52221e+06	2.63764e+06	2.89563e+06	3.71146e+06	3.62914e+06	3.74583e+06	5.63646e+06	4.18722e+06	6.17182e+06	3.40567e+06	7.51485e+06	8.90924e+06	8.13927e+06	3.95941e+06	5.60499e+06	2.51289e+06
sp1790	3.32425e+06	6.75538e+06	6.59057e+06	8.11557e+06	6.82687e+06	6.72801e+06	5.25264e+06	1.41688e+07	1.20399e+07	2.30021e+06	1.45663e+07	9.46396e+06	2.15275e+07	2.30743e+07	3.99861e+06	2.56048e+07	1.16863e+07	8.68391e+06	7.76864e+06	5.50753e+06	4.65123e+06	1.05406e+07	5.97857e+06	1.29336e+07	4.42176e+06	9.87659e+06	1.52298e+07	3.30155e+07	7.76682e+06	9.78857e+06	2.12367e+07	4.0559e+07	6.43492e+06	4.38069e+07	1.43857e+07	5.57929e+07	6.33888e+07	5.18436e+07	3.93191e+07	4.07631e+07	5.11393e+07	5.88362e+07	5.70589e+07	3.94565e+07	3.97045e+07	4.278e+07	6.48827e+07	2.59918e+07	2.59126e+07
sp1791	3.13236e+07	2.2808e+07	3.03165e+07	1.29758e+07	1.72107e+07	3.16638e+07	1.88494e+07	6.37464e+07	1.13497e+07	4.63071e+07	9.84145e+06	1.92222e+07	4.9044e+07	5.18142e+07	2.04783e+07	1.42478e+07	2.20452e+07	3.366e+07	3.52338e+07	7.45852e+07	3.62654e+07	5.63078e+07	3.59786e+07	4.72555e+07	3.60276e+07	1.70223e+07	7.75617e+07	2.85139e+07	3.08086e+07	4.9619e+07	5.95793e+07	9.7261e+06	2.14112e+07	2.92663e+07	2.33667e+07	5.09102e+07	7.30788e+07	5.73461e+07	5.58572e+07	2.74998e+07	5.60771e+07	4.11324e+07	4.33383e+07	6.2185e+07	4.53312e+07	3.66244e+07	6.11147e+07	6.40395e+07	5.36891e+07
sp1795	968167	119682	89027.1	426841	332298	293997	293372	434075	91891.3	1.61751e+06	149184	68381.1	294539	243980	89853.5	35032.3	774050	75268.1	95128.9	747123	364238	538415	97019.9	266108	35801.5	122430	29761.9	5.47814e+06	764937	754717	605772	151164	144416	1.54166e+06	909077	30026.2	13562.3	29116.5	1276.28	98064.6	91561.2	525692	164963	37815.3	19850.6	104763	3742.07	1630.84	52089.3
sp1799	823593	854571	579592	850027	978208	901009	772433	771765	1.22563e+06	935052	510434	760717	562187	863729	1.26028e+06	1.11097e+06	974502	932654	611696	573555	406083	723966	932595	620400	874931	1.01412e+06	1.02943e+06	1.19851e+06	861282	461259	743791	1.28755e+06	741070	1.25659e+06	785369	543766	911934	640957	937642	441867	627831	793165	463021	705862	754110	918583	722596	499455	1.03291e+06
sp1801	24133.9	77325.5	147116	116802	112161	112188	14147.5	66094.4	119934	577807	225080	210143	329055	222148	267208	123165	165832	114143	97604.2	183071	262970	469046	144330	149171	290593	37479.9	96773.7	292446	91296.4	72779.2	47095.8	254299	22655.9	132421	109964	127537	276402	185920	86189.7	160608	122406	237333	90791.6	211953	162370	56852.4	124865	100240	83062.2
sp1805	924556	876870	794944	985176	680601	926595	1.09466e+06	603093	998242	938880	886002	1.15493e+06	1.00475e+06	1.13309e+06	562299	1.28481e+06	1.09288e+06	1.17809e+06	888779	709263	1.03613e+06	1.11611e+06	1.57763e+06	996459	1.11744e+06	1.02515e+06	1.49913e+06	1.87341e+06	1.58391e+06	1.25194e+06	1.1505e+06	1.61966e+06	1.13903e+06	1.70203e+06	865926	841751	1.13114e+06	1.10035e+06	925450	1.0059e+06	1.1763e+06	998086	1.09973e+06	1.0148e+06	1.35973e+06	1.54321e+06	1.19746e+06	1.00305e+06	1.63062e+06
sp1807	424262	362555	302362	343771	251813	429567	246611	404256	362500	308514	186366	452625	374442	150446	359100	214179	200364	512806	208521	184149	235595	430931	396710	211394	211820	397150	405632	204348	551115	252674	311870	572227	344630	288817	273556	172094	411069	418506	185842	242877	172063	426128	316987	227493	253655	397984	359089	300334	325439
sp1809	1.02366e+06	3.80605e+06	1.16694e+06	5.48288e+06	7.48723e+06	1.57036e+06	2.02159e+06	6.973e+06	6.37088e+06	1.16612e+06	4.40488e+06	207212	3.88436e+06	3.67889e+06	1.62311e+07	8.07977e+06	1.75218e+06	573326	2.17342e+06	114263	1.19053e+06	1.26576e+06	1.33352e+06	1.24503e+06	1.20205e+06	1.05338e+06	613889	284290	494835	837341	615115	990599	3.02991e+06	174682	6.89163e+06	456490	716756	631950	733394	335344	539804	805865	523929	789837	1.11807e+06	1.09539e+06	534934	747783	219648
sp181	266237	224945	249138	561566	543384	250507	249205	359706	175956	64230.5	240740	1556.12	100936	86196.4	242790	24961.6	219318	80856.2	222491	59681.5	168665	383785	253420	259790	243024	304831	134116	96740	31502.8	168337	265875	24199.9	111655	56530.2	166595	11053.7	16677.5	16717.8	8855	3793.6	17714.4	32724	3752.25	25849.8	26158.8	44086.6	27510.8	27037.2	8436.35
sp1811	1.88655e+07	1.48599e+07	1.82173e+07	5.30074e+06	4.78908e+06	2.08431e+07	1.49932e+07	2.5597e+07	3.59524e+06	1.90489e+07	3.73696e+06	5.03483e+06	2.13399e+07	1.84013e+07	6.74917e+06	5.13829e+06	6.28568e+06	2.13401e+07	1.79379e+07	2.78203e+07	2.11375e+07	2.37849e+07	1.94393e+07	1.85806e+07	1.44006e+07	6.44778e+06	1.71326e+07	9.79816e+06	1.25263e+07	1.70326e+07	2.60882e+07	2.21622e+06	8.87109e+06	9.25314e+06	7.33623e+06	2.45614e+07	2.71198e+07	2.70086e+07	1.96839e+07	1.71281e+07	2.12083e+07	2.43198e+07	2.05246e+07	1.77814e+07	1.5872e+07	1.24092e+07	2.10369e+07	2.01632e+07	1.78594e+07
sp1817	6.15988e+06	612616	399556	1.65641e+06	2.38846e+06	2.61126e+06	2.55348e+06	4.38762e+06	626220	9.41413e+06	1.02048e+06	434952	2.72298e+06	1.53435e+06	1.27128e+06	454641	5.75147e+06	151725	1.03974e+06	3.59025e+06	3.43402e+06	4.7539e+06	577067	1.40604e+06	32684.5	788893	42222.2	3.68808e+07	4.9845e+06	4.36309e+06	1.64266e+06	709402	1.09504e+06	8.44801e+06	6.17865e+06	195171	27151.7	98880.1	58301.5	545555	444574	2.43652e+06	806920	210938	15603.6	590929	9841.74	17046.5	478313
sp1819	42007	1244.98	1707.76	4.32149e+06	3.0477e+06	21725.1	1478.57	4.25683e+06	4.70625e+06	43466.3	2.93642e+06	3082.49	5.43247e+06	5.63638e+06	4.2974e+06	3.05754e+06	1.24379e+06	7273.91	12519.8	27769.5	13546	8663.77	894.892	4622.13	3447.68	12927.8	5167.93	3112.65	1666.82	4295.5	5736.97	1561.8	4026.63	3715.46	4.44853e+06	4982.18	4161.01	3124.14	3430.3	3265.3	12492	4310.4	2043.54	1384.58	6233.9	24178.1	5253.17	2408.91	15189.7
sp182	77277.1	48320.9	275179	431248	553758	191760	309060	379733	106551	211673	504205	44699.5	439191	400691	178651	84393.3	123133	73068.5	81113.7	184370	229962	170230	208627	236471	185183	266926	479959	216932	193289	257935	132680	12052.5	61422.8	193646	122084	12034	29440.9	36091.7	19981.9	29905.9	25254	36277.5	19864.1	21676.1	61243.6	28906.4	36535.4	47410	13287.1
sp1823	3.66248e+06	3.64479e+06	2.57115e+06	4.28179e+06	3.03623e+06	5.09331e+06	3.92507e+06	5.57714e+06	6.34416e+06	3.69862e+06	9.96814e+06	19807.7	6.41458e+06	7.5329e+06	232724	16441.7	4.48013e+06	1.04911e+07	3.36334e+06	4.40864e+06	1.71655e+06	6.84878e+06	42071.3	2.06963e+06	5.0829e+06	5.51208e+06	104400	186594	4.97413e+06	3.70643e+06	5.57123e+06	62134.7	492002	130700	9.08724e+06	389799	105706	141065	33974	85745.2	61067.4	23620.9	46268.4	45369.2	100072	168624	52647.5	37163.8	22682.6
sp183	241261	72187.2	76216.3	95423.9	286585	219309	116885	230651	239373	213606	87264.7	163070	107444	99083.5	112297	101891	90600.4	329100	101152	54014.7	134194	239939	85493.1	117633	135436	2591.37	78962.3	122402	87037	100	105571	100	100	100	2876.84	100	98311.1	3494.9	2283.55	138915	155627	149882	100	126836	100	103420	100953	100	117933
sp1830	8.45695e+06	1.06828e+07	5.83018e+06	1.19736e+07	1.30138e+07	6.61547e+06	1.05372e+07	4.91726e+06	2.61582e+07	8.66968e+06	1.00727e+07	1.28883e+06	9.2605e+06	1.98941e+07	2.51457e+07	7.97279e+06	3.29391e+06	2.34582e+06	1.47342e+07	985215	7.78635e+06	1.17758e+07	6.78623e+06	7.05571e+06	7.63085e+06	2.45364e+06	2.54111e+06	1.81296e+06	2.01604e+06	3.83419e+06	1.2768e+06	3.77244e+06	8.89449e+06	1.75475e+06	1.14191e+07	3.61648e+06	3.49962e+06	3.25106e+06	3.88195e+06	3.1542e+06	2.7112e+06	6.30451e+06	3.04907e+06	3.20659e+06	5.00615e+06	1.92347e+06	2.03503e+06	3.70719e+06	1.6667e+06
sp1837	101636	116173	51911	416362	654785	10906.8	188344	724469	80060.9	162307	257571	63824.3	299153	449970	59877	284004	456456	39135	53460.2	91460.4	41737.8	263423	106052	121711	50155.9	35088.3	256428	95993.7	189781	18761.5	174739	1.19666e+06	82539.8	231064	623431	318491	260749	174357	221187	125881	281848	286706	150471	293637	479462	591855	147081	217638	158975
sp1838	125878	1.58638e+06	518303	275112	180746	507297	218321	443453	212255	189519	1.16879e+06	1.49796e+07	178481	151186	376726	2.48033e+06	479070	440036	1.45839e+06	741982	207469	297390	514598	356916	323341	423954	498224	454370	1.08264e+06	803125	1.16734e+06	1.21309e+06	1.04148e+06	910537	622749	2.41744e+06	1.62669e+06	1.14747e+06	1.46028e+06	967129	1.6767e+06	1.87891e+06	1.34747e+06	889319	1.14943e+06	706627	2.53135e+06	1.27619e+06	1.01235e+06
sp1842	27708.1	27264	21447.4	22512.6	18440.6	20604.3	23587.2	19791.5	18709.2	27258.8	24705.2	19962.2	23348.7	18046.6	22732.9	22817.1	30508.6	27087.1	20790.5	18038.8	27666	16716.6	28905.2	16890.1	24192.7	20987.7	29330.1	31580.6	38761.5	19813	22442.2	24844.3	34201.3	22657.8	25671.5	22792.4	22145.6	32174.3	29513.8	34088.8	29748.5	29061.2	56.6017	31.3756	25615.4	33159.5	33750.4	29659.3	37058.5
sp1844	2.31192e+06	197934	436136	321949	236018	150325	336640	130790	293923	232399	157533	86321.2	314717	331402	235296	416185	213973	262938	263679	86204.2	117428	287740	163258	195934	143523	108656	257380	353596	165124	120090	222888	96389.6	67810.7	324474	578101	495624	435344	470342	469691	306432	490321	428868	541114	564478	1.09883e+06	730289	376715	188657	189861
sp1849	52139.1	198130	99288.1	94973.9	99189	76199.2	66993.1	346276	28719.1	160570	543767	375806	480719	506919	76031.4	76369.4	275648	101706	334233	164378	147313	139422	279661	172292	38441.9	66372.1	13923.3	15136.9	155845	87007.5	339810	222634	253238	54596.1	365821	175851	190945	139997	204456	178613	118388	172197	151233	117410	74151	132859	250265	194193	236434
sp185	8.50918e+06	1.15182e+07	1.15179e+07	1.08927e+07	1.35855e+07	8.74725e+06	6.92591e+06	2.7117e+07	1.01473e+07	1.06358e+07	2.05192e+07	3.88913e+07	1.22789e+07	1.02707e+07	1.38133e+07	9.84513e+06	2.6929e+07	1.33355e+07	1.71406e+07	1.49079e+07	1.27568e+07	1.32234e+07	1.12487e+07	9.59942e+06	8.39108e+06	4.34568e+06	1.49033e+07	2.24641e+07	1.27699e+07	7.32628e+06	7.06939e+06	4.06743e+07	8.23372e+06	2.04255e+07	3.08256e+07	1.21422e+07	1.25327e+07	1.17945e+07	1.01618e+07	1.31216e+07	1.5233e+07	1.98066e+07	1.077e+07	8.97451e+06	9.60157e+06	1.06162e+07	2.09975e+07	1.42462e+07	9.5015e+06
sp1850	1.32469e+06	64414.7	213154	318591	143667	168134	347737	340211	362107	269518	440925	159831	907283	831907	163693	387801	118214	189817	299724	108372	129862	209526	195284	168831	100146	133053	1.57188e+06	1.63412e+06	523029	72507	121041	56529	166275	1.34002e+06	1.45806e+06	255238	240574	195837	200160	152298	231311	204976	185358	231517	263281	234688	236021	106744	138373
sp1851	47555.8	353687	288578	10206.9	32837.1	59489.4	241132	66009.8	61257.4	40668.3	72234.9	1.50214e+06	103321	204887	52000.7	322892	86513.7	343577	213775	217003	33396.5	137697	46059.5	198312	197025	238144	134263	63714.7	261942	89657.3	1.179e+06	216842	230913	155778	150257	497999	256145	374607	434529	270765	333044	479144	386165	105774	464961	173172	428373	201046	224899
sp1854	66980.2	78232.4	75783.9	72425.6	68056.8	70044.5	76115.6	69891.2	60163.5	73821.9	75291.9	76335.6	69045.4	75287.3	70945.1	80301.7	73316.5	65243.7	74101.5	74616.2	74166.3	67730.4	73338.6	84348.7	72075.8	75123.4	89836	77602.2	77914.8	75880.3	77468.5	79529.7	74627	78986.1	80976	86290	88802.5	76900.4	81681.6	75959.3	100670	112125	103729	111298	116822	104572	109688	104527	100929
sp1855	2.44272e+06	5.99377e+06	4.76085e+06	1.87346e+06	976184	469944	2.33501e+06	1.78113e+06	3.41226e+06	1.02773e+06	4.66548e+06	2.01099e+07	1.99273e+06	4.55177e+06	1.29444e+06	1.2274e+07	2.38589e+06	4.57327e+06	4.82167e+06	4.06854e+06	1.16574e+06	2.79876e+06	2.13279e+06	4.31406e+06	3.27492e+06	2.84713e+06	1.99094e+06	2.01428e+06	3.90129e+06	2.37527e+06	1.04261e+07	4.0914e+06	3.60209e+06	2.53629e+06	2.34541e+06	1.23676e+07	8.54962e+06	7.92218e+06	8.55937e+06	6.16013e+06	8.54036e+06	7.79043e+06	8.61251e+06	5.63583e+06	7.05301e+06	5.84317e+06	1.14947e+07	6.40224e+06	4.97196e+06
sp1857	2.12326e+06	6.42502e+06	5.64555e+06	1.73897e+06	738427	426534	2.09939e+06	1.91842e+06	3.12571e+06	813225	4.27258e+06	2.17887e+07	2.30391e+06	1.74289e+06	1.38423e+06	1.03795e+07	1.78328e+06	6.37054e+06	3.97098e+06	2.86272e+06	976096	2.32858e+06	1.49298e+06	3.36724e+06	2.23146e+06	2.19378e+06	2.07126e+06	1.89486e+06	3.36795e+06	2.51431e+06	9.56151e+06	3.96957e+06	3.30099e+06	2.50862e+06	2.28601e+06	1.16878e+07	8.1163e+06	7.25138e+06	8.42306e+06	5.25876e+06	5.73506e+06	7.56581e+06	7.4572e+06	4.70086e+06	8.19602e+06	4.41652e+06	1.01431e+07	5.67888e+06	5.1873e+06
sp1858	17759.3	12693.4	25344.2	81927.7	46750.9	27473.2	876692	408229	93594.5	63165	108879	11184	304258	356095	55749.8	172961	11002.7	116589	89561.8	30611.7	23375.2	148558	19508.4	14783.5	40884.2	39118.5	102052	49644.1	16711	26138.4	199633	195.55	14813.1	40866.1	637580	6111.18	830.677	10232	11302.9	3082.19	17613.1	24965.4	13558.2	7510.06	9672.42	3875.81	12112.3	4974.68	4594.26
sp186	6.93642e+06	5.51471e+06	7.38085e+06	2.93835e+06	3.31246e+06	8.84661e+06	4.70415e+06	1.45851e+07	2.96172e+06	8.02874e+06	2.47381e+06	4.28414e+06	1.06662e+07	7.82432e+06	2.77925e+06	2.25263e+06	1.77791e+06	1.21934e+07	9.09048e+06	1.28563e+07	7.25315e+06	1.66992e+07	5.68266e+06	9.48389e+06	8.32858e+06	5.52245e+06	1.15218e+07	6.31005e+06	5.84394e+06	1.28224e+07	6.29419e+06	2.29964e+06	3.60025e+06	6.00014e+06	4.16984e+06	1.23147e+07	1.10021e+07	1.33525e+07	1.01971e+07	9.74021e+06	1.05379e+07	1.03307e+07	1.03393e+07	6.74682e+06	6.68895e+06	8.17259e+06	8.10147e+06	1.0389e+07	8.56395e+06
sp1860	101193	129472	118902	83596	62164.4	13334.2	83740.3	94429.6	120634	22050	159608	609784	64489.2	83448	41328.4	300561	76576.6	153900	118266	141312	29187.4	62640.2	71180.8	140314	83318.7	110190	84025.5	50697.4	120295	109385	450718	134337	147780	87617.3	56623.8	419694	159737	215930	263869	188381	254848	246952	208031	142750	296479	134981	355138	138840	172630
sp1861	15924.9	9805.91	11187.4	44641.3	257667	8037.41	14956.6	355624	808973	7559.57	247926	23811.5	335717	481508	618870	193511	7101.49	26993.6	17471.1	1175.61	11949.7	8485.76	13466.1	14060.4	7215.2	39747.1	13058.6	5889.04	4655.95	780.399	8467.78	7956.24	3042.09	3789.54	443568	2660.23	10434	3483.83	8917.46	8237.63	5481.22	3037.9	6627.02	16794.7	4635.07	6058.81	6547.83	4635.53	2050.63
sp1862	66453.5	85595.1	59846.2	57832.8	30652	72968.5	57854.6	82047.2	120977	139519	87518.6	33400.3	51811.8	95955.6	109564	78893.9	89685.4	30484.7	23571.2	52342.8	111018	41267.6	54619.3	49796.4	83562.1	180035	76184.6	17512.8	46079.9	11303.3	11524.2	85659.8	44212.1	24128.8	90168.3	17221.8	17749.4	7588.49	7330.33	19128.1	6241.5	4390.95	100	33608.2	50532.9	87643.5	20028.2	7518.07	2224.04
sp1864	364079	490086	512373	889690	693945	318112	454574	571367	381623	206074	355331	413006	217391	279479	546069	339461	576951	529579	290852	453679	382753	267338	191872	257191	202135	119174	420498	927133	657625	560041	412962	657975	550851	856937	645657	349774	357784	308551	284418	307682	366719	435401	233598	532906	629139	571890	385202	430899	507389
sp1868	19986.8	77134.6	17697.6	13592.4	21168.4	40275.1	32695.8	90403.5	54230.7	5686.75	79533.4	277134	26289.7	43430.4	8488.8	55345.3	61019.6	48200.5	107106	38301.8	46153.2	63877.8	29816.8	30614.7	20682.5	24896.6	22421.2	54648.7	115281	27805.1	256354	80401.8	36786.1	48509.6	109350	71905.3	100391	58259.1	31215.4	71945.1	81925.7	83226.5	106212	51462.2	59939	57919.9	99497.4	30406.7	41247.9
sp1870	540634	448276	743248	1.87231e+06	521328	448237	836167	1.78703e+06	1.20922e+06	765669	1.62782e+06	396166	912283	1.11917e+06	707129	3.83883e+06	1.08144e+06	977626	545448	848022	454631	455892	242903	1.39368e+06	1.66161e+06	1.03811e+06	407701	184187	684905	577062	338054	568445	139041	172724	353153	728070	526061	493630	499220	496166	1.11575e+06	566017	736889	3.49571e+06	3.69312e+06	5.05939e+06	252724	561653	459943
sp1871	4368.44	8793.3	706.999	216531	120630	7449.96	5649.14	372604	1.14566e+06	8918.79	374108	3872.46	159931	232589	324791	159044	24241.2	100	10496.6	616.279	13584.3	4060.58	2446.93	4356.77	1228.89	989.546	6809.43	12905.2	3549.68	100	4819.07	4685.28	1653.22	602.592	439703	100	4587.38	4323.78	1701.71	3919.11	996.74	13159.3	985.96	1731.34	782.901	2700.7	2490.79	1916.78	3929.15
sp1872	202278	322843	202157	320661	259689	205398	298753	208266	347133	180591	306865	330560	361301	107255	529543	547556	988369	222691	242382	421062	179892	333101	146674	234481	236182	120183	308933	397443	180399	164402	192775	175336	165668	423386	193914	522794	565311	308208	260424	257341	553884	444633	210466	19794.6	388165	491248	473905	302344	291709
sp1873	144764	102357	123739	113456	88786.2	92369.5	96839.5	155754	95220.2	198577	122341	114693	119478	206516	52764	130400	150611	156698	172761	86532.3	179138	165203	132105	163263	140767	80829.4	157337	176211	167282	190672	151481	138949	173267	161673	109390	90845.8	72295.6	90224.8	119627	133242	98244.6	159345	129949	60267.7	212552	159038	185768	50958.5	176214
sp1875	4.95486e+06	2.75473e+06	5.30074e+06	2.60906e+07	1.98524e+07	3.63024e+06	4.69383e+06	1.88909e+07	1.38038e+07	891564	7.98709e+06	1.9724e+06	1.29634e+06	1.68244e+06	8.136e+06	5.74777e+06	1.34856e+07	1.47401e+06	7.85649e+06	1.75226e+06	3.82296e+06	5.91734e+06	5.31375e+06	3.23089e+06	3.18673e+06	1.51397e+06	4.61222e+06	4.92283e+06	216927	2.68914e+06	3.48053e+06	100	2.87708e+06	6.76558e+06	1.51959e+07	1.91791e+07	2.55787e+06	1.10848e+07	100	100	1.48696e+07	1.84868e+07	100	9.85569e+06	1.88792e+07	100	1.5309e+07	1.49287e+06	100
sp1878	68009.4	36223.4	73643.5	188858	227733	19515.3	65335.1	229602	89415.5	72532.6	434526	19836.9	802615	713738	18522.9	38852.9	704944	44718.2	247781	74170.9	57076.8	115784	96582.9	135085	51440.4	140776	270378	199741	41089.2	101123	161481	1.04977e+06	149059	290772	751749	670321	730733	584743	599482	523229	649524	719292	422652	724543	547304	955486	754117	571512	729036
sp188	3.37439e+07	1.33532e+07	3.05089e+07	1.47131e+07	1.75694e+07	2.44182e+07	2.69378e+07	3.65916e+07	7.59053e+06	3.77942e+07	1.28363e+07	1.20957e+07	3.70376e+07	4.10146e+07	2.06928e+07	1.79348e+07	2.32554e+07	3.4689e+07	2.18488e+07	5.78112e+07	3.57388e+07	5.38411e+07	1.89855e+07	2.85967e+07	2.61169e+07	1.42466e+07	4.0065e+07	1.86709e+07	2.41277e+07	3.04413e+07	4.13751e+07	4.28081e+06	9.88325e+06	1.69923e+07	1.19666e+07	4.69884e+07	6.06493e+07	5.44365e+07	3.55848e+07	2.59531e+07	4.38984e+07	4.27021e+07	3.18465e+07	4.22018e+07	3.43395e+07	2.30786e+07	3.52766e+07	4.94629e+07	2.75103e+07
[truncated: 413 more rows]
[truncated: 65 more columns]

## Sheet: Table S4
Table S4. Differential metabolites in cultivated and landrace seeds.
ID	VIP	class	Compounds	Fold Change
hua001	1.10952	Anthocyanins	Cyanidin	32.2969
hua011	1.25583	Anthocyanins	Peonidin O-hexoside	0.335717
hua014	1.00293	Anthocyanins	Petunidin 3-O-glucoside	0.450736
[truncated: 170 more rows]

## Sheet: Table S5
Table S5. Loadings (correlation coefficients between the original variables and the principal components) of the three Dims (PC1, PC2 and PC3) for germinated rice sample.
[truncated: 899 more rows]

[truncated: 8 more sheets: Table S6, Table S7, Table S8, Table S9, Table S10, Table S11, Table S12, Table S13]
